# Supplementary material for: Comparative Transcriptomic Analyses of Different Jujube Cultivars Reveal the Co-Regulation of Multiple Pathways during Fruit Cracking
Source: MDPI journal article supplement (doi:10.3390/genes13010105), 2022-01-02
Supplement: s1 [file s1]

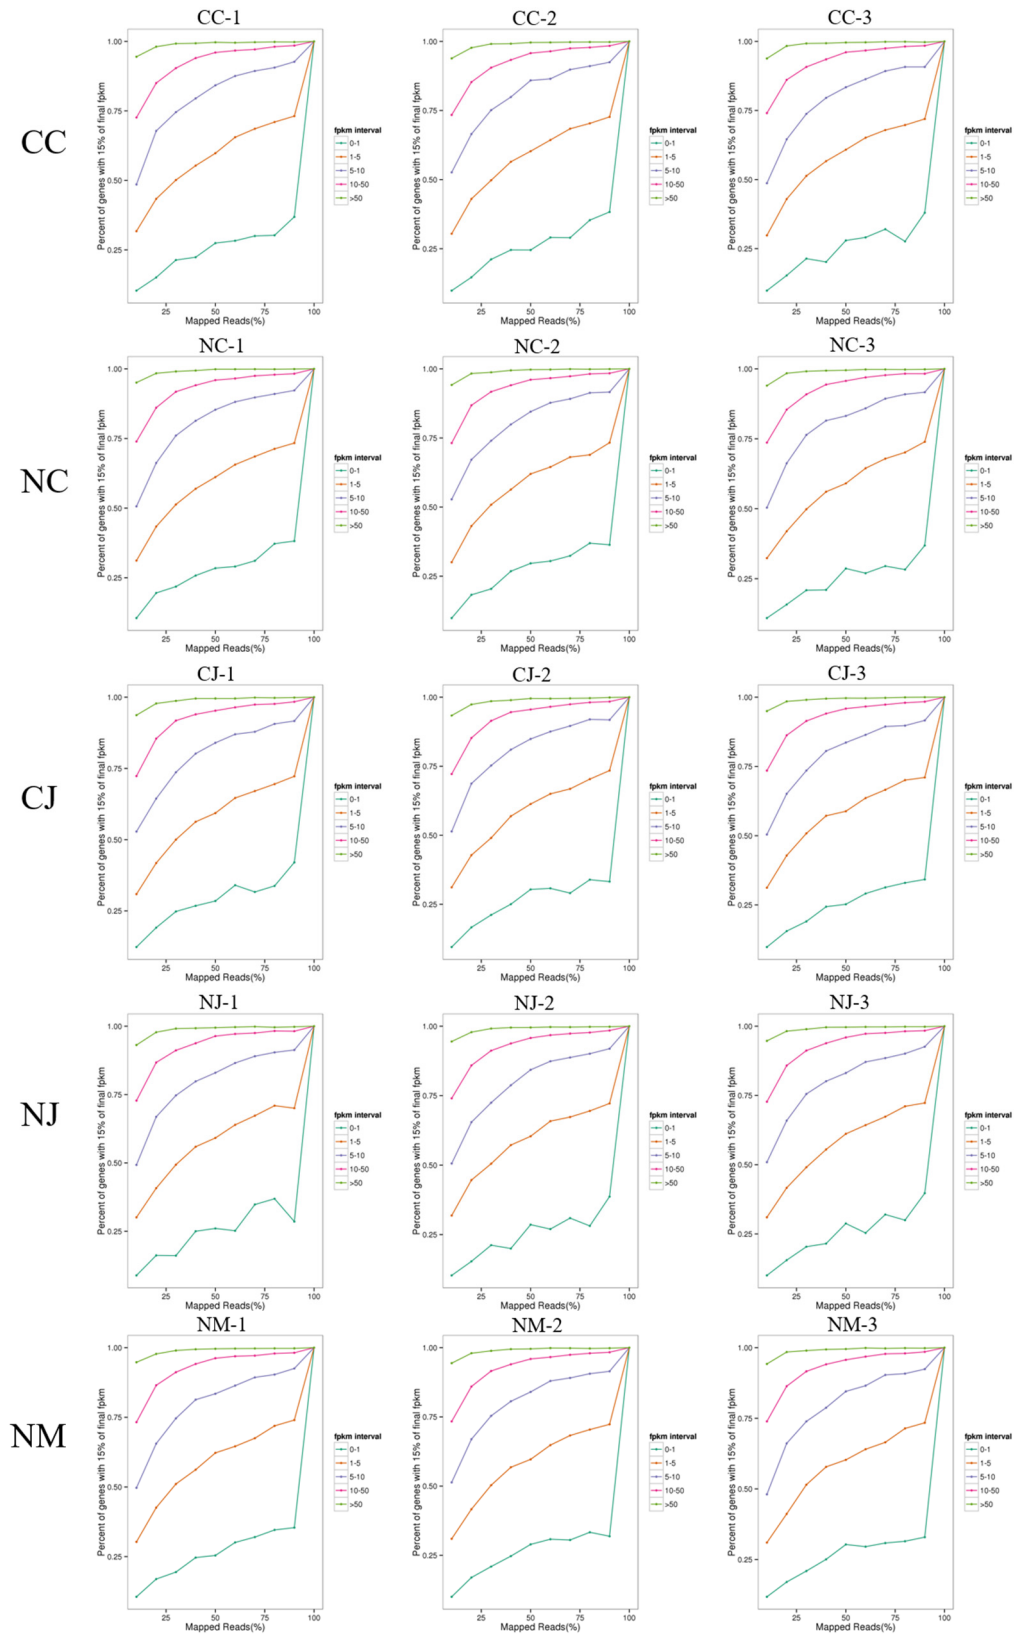

**Figure S1.** The saturation curve of different ripening stages. The X axis represents the percent of mapped reads. The Y axis represents the percent of the genes of which FPKM deviates within 15% of the final value. Different color of the curves stands for the saturation curve of the genes in different expression levels.
