# Supplementary material for: Comparative Transcriptomic Analyses of Different Jujube Cultivars Reveal the Co-Regulation of Multiple Pathways during Fruit Cracking
Source: MDPI journal article supplement (doi:10.3390/genes13010105), 2022-01-02
Supplement: s1 [file s1]

CC

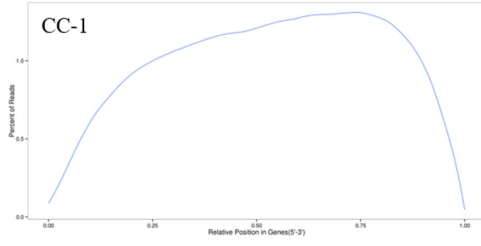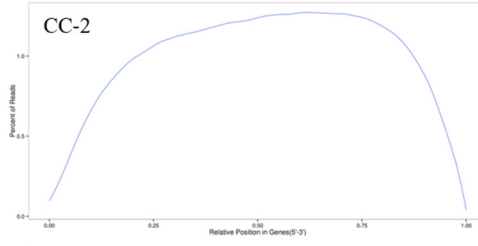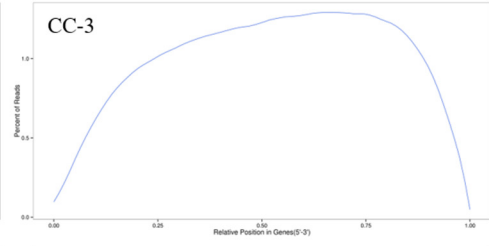

NC

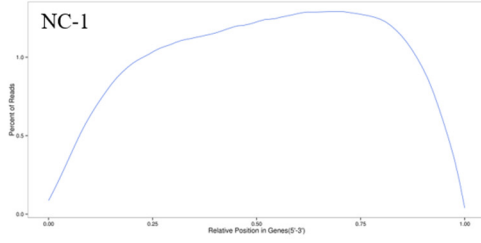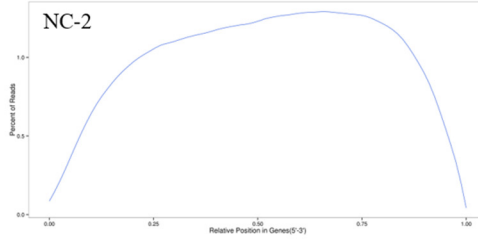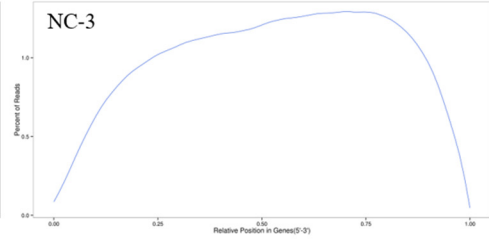

CJ

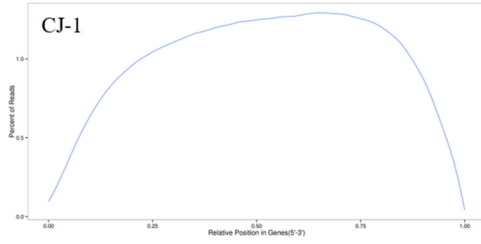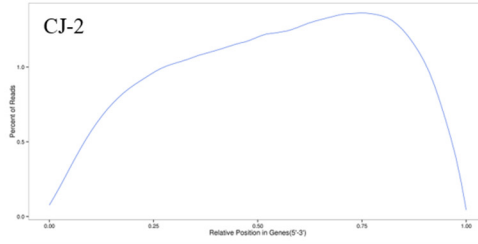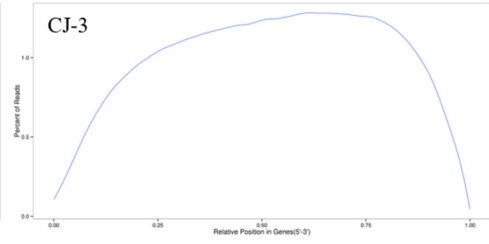

NJ

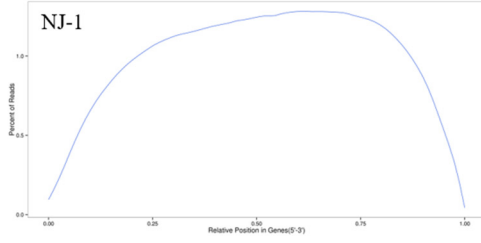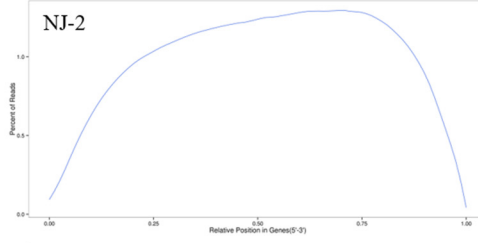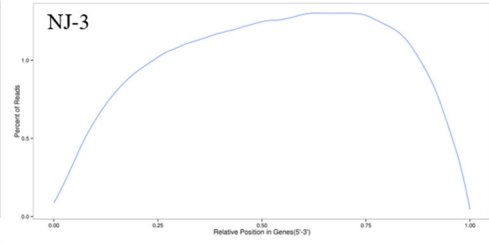

NM

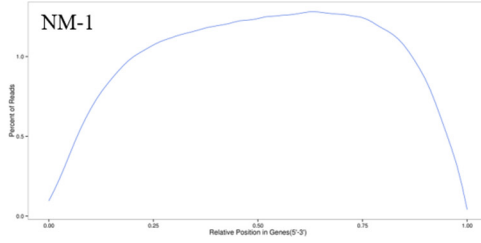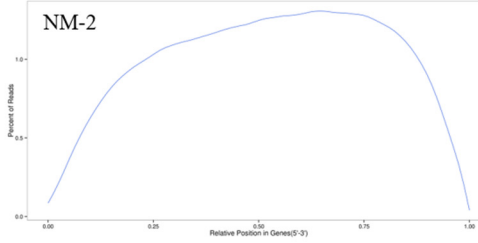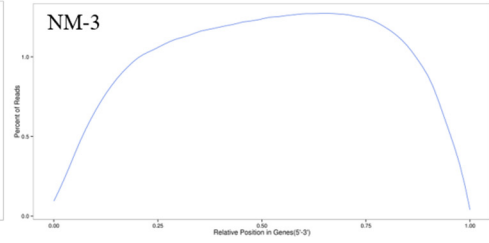

**Figure S2.** The Coverage of sequencing. The X axis represents the relative position in genes body (from 5' to 3'). The Y axis represents the percent of reads.
