# Supplementary material for: Comparative Transcriptomic Analyses of Different Jujube Cultivars Reveal the Co-Regulation of Multiple Pathways during Fruit Cracking
Source: Genes (Basel). 2022 Jan 2;13(1):105. doi: 10.3390/genes13010105 (PMC8775106; doi:10.3390/genes13010105)
Supplement: Supplementary file 1 [file genes-13-00105-s001.zip]

Archive with 12 entries (12 files):
- Figure S1.pdf
- Figure S2.pdf
- Figure S3.pdf
- Figure S4.pdf
- Table S1.xls
- Table S2.xls
- Table S3.xls
- Table S4.xls
- Table S5.xls
- Table S6.xls
- Table S7.xls
- Table S8.xls
