# Supplementary material for: Comparative Transcriptomic Analyses of Different Jujube Cultivars Reveal the Co-Regulation of Multiple Pathways during Fruit Cracking
Source: Genes (Basel). 2022 Jan 2;13(1):105. doi: 10.3390/genes13010105 (PMC8775106; doi:10.3390/genes13010105)
Supplement: Supplementary file 1 [file genes-13-00105-s001.zip › Table S1.xls]

## Sheet: Sheet1
Table S1 Primer used for qRT-PCR
Gene name	Forward primer (5’-3’)	Reverse primer (5’-3’)	Product size (bp)
ACA12	ATAGCCATCCTCTTGACATTGC	ACTCCTTGAATTGAACTCGTTGAA	129
CML41	AATCCAGTTCCACAGTAAGTTCC	TTTACCATCTCCATTCCCATCAAA	122
EP1	CTTGGGCTACTGCTTCTTGTTTGT	GTATTCGGCGGTCGGTTGTC	106
EXLB1	GCAACGCTTAATGGTGGAGATGTA	GAGCACTTGAACCTTGGTCTGT	154
MYB44	TTGATTGGAGGAGGAAATGGGTTA	CGCTGTGATGTTGCTCTTATTGG	147
TIP1-3	TCACTGGCTCACGCATTCG	GCAAGCAAGCGACGACTGA	175
ABR1	GCCGCAGCCGTCTACTATA	CAGAAGAAGGAGAAGGAGAAGGA	161
LUS1	CTGGGTGTGTATGATTGGGAAG	CTGTTGAATGAGTGGTGTTATGGA	177
EXT2	TCTAAGACCGAGGATGAAGTTGTG	AGGAGGATGAGATGGCTTGTG	102
NCED1	CTTACTTGGCAATCGCAGAAC	ATGTCCTCTCGTCGTGAAC	198
XTH2	GCCTTCCACACCTATTCTCTTG	TCCTCATTGGTTGGTTGATTGG	130
Actin	AGCCTTCCTGCCAACGAGT	TTGCTTCTCACCCTTGATGC	125
