# Supplementary material for: Comparative Transcriptomic Analyses of Different Jujube Cultivars Reveal the Co-Regulation of Multiple Pathways during Fruit Cracking
Source: Genes (Basel). 2022 Jan 2;13(1):105. doi: 10.3390/genes13010105 (PMC8775106; doi:10.3390/genes13010105)
Supplement: Supplementary file 1 [file genes-13-00105-s001.zip › Table S2.xls]

## Sheet: Sheet1
Table S2 Summary of sequence assembly after Illumina sequencing
Sample	Raw Reads	Clea reads	Clea bases	Clean reads in raw reads (%)	Error rate (%)	Q30(%)	Q20(%)	GC(%)
CC1	27911956	27348063	8187810312	0.979797	0.02	0.915	96.29	0.4432
CC2	23093454	22645386	6777033092	0.980598	0.02	0.9133	96.21	0.4455
CC3	28084892	27460852	8203249066	0.97778	0.02	0.9143	96.25	0.4438
NC1	26807333	26312225	7878761828	0.981531	0.01	0.8729	94.45	0.447
NC2	25162026	24678477	7387371730	0.980783	0.01	0.8662	94.07	0.448
NC3	26976458	26431793	7909753392	0.97981	0.01	0.8686	94.2	0.4508
CJ1	27391979	26885481	8049808378	0.981509	0.01	0.8648	93.98	0.4441
CJ2	25997926	25482417	7623730220	0.980171	0.01	0.8716	94.36	0.4477
CJ3	34074022	33412172	9996045764	0.980576	0.01	0.871	94.34	0.4426
NJ1	27172135	22880862	6840299092	0.842071	0.01	0.8676	94.13	0.4612
NJ2	25015586	24546843	7346811690	0.981262	0.01	0.8728	94.45	0.4453
NJ3	30165262	29484329	8814042432	0.977427	0.01	0.8671	94.12	0.4569
NM1	31317678	30684937	9174771620	0.979796	0.01	0.8713	94.36	0.4451
NM2	27201745	26688488	7986463930	0.981131	0.01	0.872	94.4	0.4456
NM3	27983535	27383331	8154807470	0.978552	0.01	0.8748	94.56	0.4446
