# Supplementary material for: Comparative Transcriptomic Analyses of Different Jujube Cultivars Reveal the Co-Regulation of Multiple Pathways during Fruit Cracking
Source: Genes (Basel). 2022 Jan 2;13(1):105. doi: 10.3390/genes13010105 (PMC8775106; doi:10.3390/genes13010105)
Supplement: Supplementary file 1 [file genes-13-00105-s001.zip › Table S3.xls]

## Sheet: Sheet1
Table S3 Clean reads mapped to the reference genome
Sample	Total Reads	Mapped Reads	Uiq Mapped Reads	Multiple Map Reads	Reads Map to '+'	Reads Map to '-'
CC1	54696126	40,251,203 (73.59%)	35,368,007 (64.66%)	4,883,196 (8.93%)	18,839,418 (34.44%)	18,951,973 (34.65%)
CC2	45290772	33,032,792 (72.93%)	28,756,178 (63.49%)	4,276,614 (9.44%)	15,390,468 (33.98%)	15,463,090 (34.14%)
CC3	54921704	40,064,605 (72.95%)	35,115,006 (63.94%)	4,949,599 (9.01%)	18,783,583 (34.20%)	18,847,626 (34.32%)
NC1	52624450	37,169,933 (70.63%)	32,555,423 (61.86%)	4,614,510 (8.77%)	17,336,358 (32.94%)	17,434,369 (33.13%)
NC2	49356954	34,686,328 (70.28%)	30,143,597 (61.07%)	4,542,731 (9.20%)	16,130,368 (32.68%)	16,203,239 (32.83%)
NC3	52863586	37,162,938 (70.30%)	30,850,910 (58.36%)	6,312,028 (11.94%)	16,805,790 (31.79%)	16,828,528 (31.83%)
CJ1	53770962	37,799,931 (70.30%)	33,333,343 (61.99%)	4,466,588 (8.31%)	17,772,995 (33.05%)	17,828,435 (33.16%)
CJ2	50964834	35,886,720 (70.41%)	31,243,895 (61.30%)	4,642,825 (9.11%)	16,763,874 (32.89%)	16,824,912 (33.01%)
CJ3	66824344	47,616,430 (71.26%)	42,203,163 (63.16%)	5,413,267 (8.10%)	22,452,594 (33.60%)	22,514,892 (33.69%)
NJ1	45761724	33,012,761 (72.14%)	24,847,225 (54.30%)	8,165,536 (17.84%)	14,030,625 (30.66%)	14,000,731 (30.59%)
NJ2	49093686	34,853,418 (70.99%)	30,816,004 (62.77%)	4,037,414 (8.22%)	16,393,725 (33.39%)	16,435,754 (33.48%)
NJ3	58968658	42,479,197 (72.04%)	33,071,666 (56.08%)	9,407,531 (15.95%)	18,423,163 (31.24%)	18,418,988 (31.24%)
NM1	61369874	43,618,737 (71.08%)	38,312,463 (62.43%)	5,306,274 (8.65%)	20,498,240 (33.40%)	20,487,383 (33.38%)
NM2	53376976	37,896,831 (71.00%)	33,281,369 (62.35%)	4,615,462 (8.65%)	17,776,890 (33.30%)	17,784,339 (33.32%)
NM3	54766662	39,026,024 (71.26%)	34,421,331 (62.85%)	4,604,693 (8.41%)	18,323,520 (33.46%)	18,355,841 (33.52%)
