# Supplementary material for: Comparative Transcriptomic Analyses of Different Jujube Cultivars Reveal the Co-Regulation of Multiple Pathways during Fruit Cracking
Source: Genes (Basel). 2022 Jan 2;13(1):105. doi: 10.3390/genes13010105 (PMC8775106; doi:10.3390/genes13010105)
Supplement: Supplementary file 1 [file genes-13-00105-s001.zip › Table S4.xls]

## Sheet: CC vs. NC
#ID	gene_name	CC1 FPKM	CC2 FPKM	CC3 FPKM	NC1 FPKM	NC2 FPKM	NC3 FPKM	P-value	log2FC	regulated	COG_class	COG_class_annotation	GO_annotation	KEGG_annotation	KEGG_pathway_annotation	Swiss-Prot_annotation	eggNOG_class	eggNOG_class_annotation	NR_annotation
gene30138	LOC107406762	21.2975	44.1169	37.3287	60.3886	86.5438	474.03	1.1499e-05	2.58618	up	[L]	Replication, recombination and repair	Molecular Function: nucleic acid binding (GO:0003676);; Molecular Function: catalytic activity (GO:0003824);; Biological Process: DNA metabolic process (GO:0006259);;	--	--	RNA-directed DNA polymerase homolog OS=Oenothera berteroana (Bertero&apos;s evening primrose) PE=4 SV=1	L	Replication, recombination and repair	hypothetical protein VITISV_001313 [Vitis vinifera]
jujube_newGene_2304	--	0.379131	8.20721	1.94525	21.3051	24.9983	11.5629	0.000170988	2.50991	up	--	--	--	--	--	--	--	--	--
jujube_newGene_1560	--	2.38898	6.31135	6.27555	7.68804	13.0093	59.7154	5.16771e-05	2.4387	up	--	--	Cellular Component: chloroplast (GO:0009507);; Molecular Function: hydrolase activity (GO:0016787);;	--	--	Protein TIC 214 {ECO:0000250|UniProtKB:P56785} OS=Vitis vinifera (Grape) PE=3 SV=1	S	Function unknown	Cell wall-associated hydrolase, partial [Medicago truncatula]
jujube_newGene_2122	--	5.08424	9.74415	9.21252	13.7243	18.0464	91.1325	3.85436e-05	2.36234	up	--	--	Cellular Component: chloroplast (GO:0009507);;	--	--	--	J	Translation, ribosomal structure and biogenesis	hypothetical protein M569_00222, partial [Genlisea aurea]
jujube_newGene_1603	--	2.00271	4.03186	3.57457	5.01391	7.05797	34.7608	5.1216e-05	2.24501	up	[CP]	Energy production and conversion;; Inorganic ion transport and metabolism	Molecular Function: NADH dehydrogenase (ubiquinone) activity (GO:0008137);; Cellular Component: chloroplast (GO:0009507);; Cellular Component: integral component of membrane (GO:0016021);; Biological Process: ATP synthesis coupled electron transport (GO:0042773);; Molecular Function: quinone binding (GO:0048038);;	K05577|0|pmum:18668087|ndhF, CP95_p018; NADH-plastoquinone oxidoreductase subunit 5; K05577 NAD(P)H-quinone oxidoreductase subunit 5 [EC:1.6.5.3] (A)	Oxidative phosphorylation (ko00190)	NAD(P)H-quinone oxidoreductase subunit 5, chloroplastic GN=ndhF OS=Eucalyptus globulus subsp. globulus (Tasmanian blue gum) PE=3 SV=1	C	Energy production and conversion	NADH-plastoquinone oxidoreductase subunit 5, partial (chloroplast) [Ceanothus prostratus]
gene17121	LOC107425343	0.0812547	0.807703	0.594516	3.37104	1.67916	0.332125	0.0130573	1.87669	up	--	--	Molecular Function: acidic amino acid transmembrane transporter activity (GO:0015172);; Molecular Function: neutral amino acid transmembrane transporter activity (GO:0015175);; Molecular Function: primary active transmembrane transporter activity (GO:0015399);; Biological Process: acidic amino acid transport (GO:0015800);; Biological Process: neutral amino acid transport (GO:0015804);; Cellular C…	--	--	Amino acid permease 3 GN=AAP3 OS=Arabidopsis thaliana (Mouse-ear cress) PE=1 SV=2	E	Amino acid transport and metabolism	PREDICTED: amino acid permease 3 isoform X1 [Vitis vinifera]
gene23270	LOC107432019	0.345252	0.6757	0.745701	1.50568	1.9011	2.19176	0.000176833	1.66469	up	--	--	Molecular Function: transferase activity, transferring glycosyl groups (GO:0016757);;	K13496|0|gmx:100777956|UDP-glycosyltransferase 73C3-like; K13496 UDP-glucosyl transferase 73C [EC:2.4.1.-] (A)	--	UDP-glycosyltransferase 73C3 GN=UGT73C3 OS=Arabidopsis thaliana (Mouse-ear cress) PE=2 SV=1	CG	Energy production and conversion;; Carbohydrate transport and metabolism	hypothetical protein VITISV_041695 [Vitis vinifera]
jujube_newGene_2633	--	12.8684	14.4685	17.8618	15.9743	24.8833	97.9108	0.00102899	1.60049	up	--	--	Cellular Component: mitochondrion (GO:0005739);;	--	--	Uncharacterized mitochondrial protein AtMg00030 GN=AtMg00030 OS=Arabidopsis thaliana (Mouse-ear cress) PE=4 SV=1	S	Function unknown	Mitochondrial protein, putative [Medicago truncatula]
gene8046	LOC107415405	16.7675	20.4642	7.1423	70.3998	34.9163	29.5154	5.20007e-05	1.58812	up	[CR]	Energy production and conversion;; General function prediction only	Molecular Function: zinc ion binding (GO:0008270);; Molecular Function: oxidoreductase activity (GO:0016491);; Biological Process: oxidation-reduction process (GO:0055114);;	--	--	2-methylene-furan-3-one reductase GN=EO OS=Fragaria ananassa (Strawberry) PE=1 SV=1	Q	Secondary metabolites biosynthesis, transport and catabolism	hypothetical protein PRUPE_ppa008661mg [Prunus persica]
gene21569	LOC107430150	0.738763	0.4776	1.07053	1.85635	2.86608	2.55018	0.00237658	1.55564	up	--	--	Molecular Function: DNA binding (GO:0003677);; Molecular Function: sequence-specific DNA binding transcription factor activity (GO:0003700);; Cellular Component: nucleus (GO:0005634);; Biological Process: regulation of transcription, DNA-templated (GO:0006355);; Molecular Function: protein dimerization activity (GO:0046983);;	--	--	Agamous-like MADS-box protein AGL19 GN=AGL19 OS=Arabidopsis thaliana (Mouse-ear cress) PE=1 SV=1	K	Transcription	PREDICTED: agamous-like MADS-box protein AGL19 [Populus euphratica]
gene1731	LOC107425856	1.80422	1.07046	1.48625	5.23359	3.92384	3.09255	0.000146166	1.49215	up	--	--	--	--	--	Protein PHLOEM PROTEIN 2-LIKE A1 GN=PP2A1 OS=Arabidopsis thaliana (Mouse-ear cress) PE=2 SV=1	R	General function prediction only	PREDICTED: protein PHLOEM PROTEIN 2-LIKE A1-like [Vitis vinifera]
jujube_newGene_3241	--	1.14545	0.347259	0.868978	1.66951	2.33588	2.17541	0.00499686	1.45693	up	--	--	--	K13457|2.78703e-42|pmum:103336812|disease resistance protein RPM1-like; K13457 disease resistance protein RPM1 (A)	Plant-pathogen interaction (ko04626)	--	T	Signal transduction mechanisms	PREDICTED: disease resistance protein RPM1-like isoform X1 [Prunus mume]
gene3748	LOC107410788	0.789127	0.926061	0.0558983	2.18795	0.877495	1.31655	0.0251979	1.40578	up	--	--	--	--	--	BURP domain-containing protein 3 (Precursor) OS=Oryza sativa subsp. japonica (Rice) PE=2 SV=1	R	General function prediction only	hypothetical protein PRUPE_ppa008862mg [Prunus persica]
gene28904	LOC107405433	1.10385	1.07678	0.736614	1.13715	1.21524	5.26319	0.011703	1.38291	up	[L]	Replication, recombination and repair	Molecular Function: nucleic acid binding (GO:0003676);; Molecular Function: catalytic activity (GO:0003824);; Biological Process: DNA metabolic process (GO:0006259);;	--	--	RNA-directed DNA polymerase homolog OS=Oenothera berteroana (Bertero&apos;s evening primrose) PE=4 SV=1	L	Replication, recombination and repair	PREDICTED: uncharacterized protein LOC102625991 [Citrus sinensis]
gene18276	LOC107426712	0.764121	1.03526	0.844636	0.924078	3.38732	2.29147	0.00527568	1.31713	up	[J]	Translation, ribosomal structure and biogenesis	Molecular Function: tRNA binding (GO:0000049);; Molecular Function: methionine-tRNA ligase activity (GO:0004825);; Molecular Function: ATP binding (GO:0005524);; Cellular Component: cytoplasm (GO:0005737);; Biological Process: methionyl-tRNA aminoacylation (GO:0006431);;	K01874|0|pper:PRUPE_ppa002951mg|hypothetical protein; K01874 methionyl-tRNA synthetase [EC:6.1.1.10] (A)	Selenocompound metabolism (ko00450);; Aminoacyl-tRNA biosynthesis (ko00970)	Probable methionine--tRNA ligase OS=Oryza sativa subsp. japonica (Rice) PE=2 SV=2	J	Translation, ribosomal structure and biogenesis	putative methionine--tRNA ligase [Morus notabilis]
gene16647	LOC107424824	2.97518	4.04114	3.45881	16.9541	5.08204	3.57349	0.00725497	1.30613	up	--	--	Cellular Component: membrane (GO:0016020);;	--	--	--	S	Function unknown	hypothetical protein JCGZ_12276 [Jatropha curcas]
gene23201	LOC107431905	4.7977	2.5886	1.39552	7.84583	7.34512	6.30628	0.00147314	1.30178	up	--	--	Biological Process: metabolic process (GO:0008152);; Molecular Function: transferase activity, transferring hexosyl groups (GO:0016758);;	--	--	UDP-glycosyltransferase 86A1 GN=UGT86A1 OS=Arabidopsis thaliana (Mouse-ear cress) PE=2 SV=1	CG	Energy production and conversion;; Carbohydrate transport and metabolism	UDP-Glycosyltransferase superfamily protein [Theobroma cacao]
gene22810	LOC107431501	0.201887	0.636657	0.261994	0.809325	1.03533	1.03282	0.0130583	1.29224	up	--	--	Biological Process: response to stress (GO:0006950);; Biological Process: response to abiotic stimulus (GO:0009628);;	K11647|1.554e-12|gmx:100796912|transcription regulatory protein SNF2-like; K11647 SWI/SNF-related matrix-associated actin-dependent regulator of chromatin subfamily A member 2/4 [EC:3.6.4.-] (A)	--	Probable ATP-dependent DNA helicase CHR12 GN=F2O10.3 OS=Arabidopsis thaliana (Mouse-ear cress) PE=2 SV=1	K	Transcription	PREDICTED: probable ATP-dependent DNA helicase CHR12 [Vitis vinifera]
gene22780	LOC107431474	16.4554	14.4335	10.4642	58.4772	22.2699	18.5677	0.00137343	1.27877	up	[P]	Inorganic ion transport and metabolism	--	--	--	Rhodanese-like domain-containing protein 15, chloroplastic (Precursor) OS=Arabidopsis thaliana (Mouse-ear cress) PE=2 SV=1	P	Inorganic ion transport and metabolism	hypothetical protein PRUPE_ppa012088mg [Prunus persica]
gene16317	LOC107424510	18.6672	12.2565	11.8729	58.7513	21.9303	20.7781	0.00115643	1.2623	up	[P]	Inorganic ion transport and metabolism	--	--	--	Rhodanese-like domain-containing protein 15, chloroplastic (Precursor) OS=Arabidopsis thaliana (Mouse-ear cress) PE=2 SV=1	P	Inorganic ion transport and metabolism	hypothetical protein PRUPE_ppa012088mg [Prunus persica]
gene5801	LOC107412967	0.180161	0.179695	0.0660336	0.525803	0.224748	0.253152	0.0191671	1.25216	up	--	--	--	--	--	Disease resistance protein At4g27190 GN=At4g27190 OS=Arabidopsis thaliana (Mouse-ear cress) PE=2 SV=1	T	Signal transduction mechanisms	Disease resistance protein [Morus notabilis]
gene25043	LOC107433962	0.188474	0.60528	0.172617	0.941494	0.775342	0.534932	0.0209567	1.22573	up	[RTKL]	General function prediction only;; Signal transduction mechanisms;; Transcription;; Replication, recombination and repair	Biological Process: cellular process (GO:0009987);; Molecular Function: kinase activity (GO:0016301);;	--	--	G-type lectin S-receptor-like serine/threonine-protein kinase RLK1 (Precursor) GN=RLK1 OS=Arabidopsis thaliana (Mouse-ear cress) PE=2 SV=2	T	Signal transduction mechanisms	PREDICTED: G-type lectin S-receptor-like serine/threonine-protein kinase RLK1 [Prunus mume]
gene13504	LOC107421403	6.53214	2.06304	8.80145	21.4283	9.60358	8.56871	0.0207277	1.21829	up	--	--	--	--	--	Uncharacterized protein At5g65660 GN=At5g65660 OS=Arabidopsis thaliana (Mouse-ear cress) PE=2 SV=1	S	Function unknown	hypothetical protein PRUPE_ppa017170mg [Prunus persica]
gene22616	LOC107431275	1.01903	3.21026	1.67649	2.5532	5.68008	5.43426	0.0148281	1.21629	up	--	--	Molecular Function: peroxidase activity (GO:0004601);; Cellular Component: extracellular region (GO:0005576);; Molecular Function: heme binding (GO:0020037);; Biological Process: hydrogen peroxide catabolic process (GO:0042744);; Molecular Function: metal ion binding (GO:0046872);; Biological Process: oxidation-reduction process (GO:0055114);;	K00430|2.36916e-152|vvi:100263665|cationic peroxidase 1-like; K00430 peroxidase [EC:1.11.1.7] (A)	Phenylalanine metabolism (ko00360);; Phenylpropanoid biosynthesis (ko00940)	Cationic peroxidase 1 (Precursor) GN=PNC1 OS=Arachis hypogaea (Peanut) PE=1 SV=2	R	General function prediction only	PREDICTED: cationic peroxidase 1-like [Vitis vinifera]
gene23783	LOC107432571	4.31894	1.66691	5.01289	9.52805	9.26276	6.69809	0.00328231	1.21488	up	--	--	--	--	--	Pathogen-related protein OS=Hordeum vulgare (Barley) PE=2 SV=2	S	Function unknown	PREDICTED: pathogen-related protein-like [Populus euphratica]
gene7175	LOC107414434	1.57802	1.92172	1.49335	2.87349	4.4839	3.92098	0.00223254	1.20169	up	--	--	Molecular Function: binding (GO:0005488);; Biological Process: transcription, DNA-templated (GO:0006351);;	K09264|2.01583e-84|vvi:100232868|MADS3; MADS-box protein 3; K09264 MADS-box transcription factor, plant (A)	--	MADS-box transcription factor 6 OS=Oryza sativa subsp. japonica (Rice) PE=1 SV=1	K	Transcription	MADS-box protein [Ficus carica]
gene1723	LOC107425702	1.09649	0.861022	1.69159	3.65017	2.31254	2.20712	0.00580927	1.18308	up	--	--	--	--	--	Protein PHLOEM PROTEIN 2-LIKE A1 GN=PP2A1 OS=Arabidopsis thaliana (Mouse-ear cress) PE=2 SV=1	R	General function prediction only	PREDICTED: protein PHLOEM PROTEIN 2-LIKE A1-like [Vitis vinifera]
gene26478	LOC107435543	1.49498	0.982745	1.72779	2.41382	3.60812	3.43631	0.0129619	1.17764	up	--	--	--	--	--	--	--	--	--
gene27398	LOC107403801	0.74025	0.476348	0.298944	1.33478	1.1113	0.842175	0.0187752	1.17391	up	--	--	Molecular Function: serine-type endopeptidase activity (GO:0004252);; Biological Process: proteolysis (GO:0006508);; Molecular Function: identical protein binding (GO:0042802);; Biological Process: negative regulation of catalytic activity (GO:0043086);;	--	--	Subtilisin-like protease SBT3.5 {ECO:0000303|PubMed:16193095} (Precursor) OS=Arabidopsis thaliana (Mouse-ear cress) PE=1 SV=1	O	Posttranslational modification, protein turnover, chaperones	PREDICTED: subtilisin-like protease SDD1-like [Fragaria vesca subsp. vesca]
gene3941	LOC107411002	0.992309	1.07444	1.52841	3.49041	2.67554	1.8531	0.00571787	1.17098	up	--	--	--	--	--	Protein PHLOEM PROTEIN 2-LIKE A1 GN=PP2A1 OS=Arabidopsis thaliana (Mouse-ear cress) PE=2 SV=1	R	General function prediction only	PREDICTED: protein PHLOEM PROTEIN 2-LIKE A1-like [Vitis vinifera]
gene1569	LOC107423847	29.5709	26.6027	13.2369	76.9025	42.4297	34.6571	0.00057524	1.16293	up	--	--	--	--	--	Stem-specific protein TSJT1 GN=TSJT1 OS=Nicotiana tabacum (Common tobacco) PE=2 SV=1	S	Function unknown	TSJT1-like protein [Theobroma cacao]
gene2604	LOC107435104	21.8433	10.7037	6.46441	44.6996	26.5223	16.7309	0.00694039	1.16235	up	--	--	--	--	--	--	S	Function unknown	PREDICTED: auxin-repressed 12.5 kDa protein-like [Pyrus x bretschneideri]
gene8988	LOC107416461	25.7693	11.6572	55.272	106.327	58.5108	42.2038	0.0118837	1.15849	up	--	--	--	--	--	--	--	--	--
gene25027	LOC107433945	6.6405	11.5325	15.1405	26.1184	28.1164	18.7069	0.000752601	1.14433	up	--	--	--	--	--	23 kDa jasmonate-induced protein OS=Hordeum vulgare (Barley) PE=2 SV=1	S	Function unknown	23 kDa jasmonate-induced protein [Citrullus lanatus]
gene5253	LOC107412364	1.69902	1.10372	0.814161	2.30901	2.10088	3.38376	0.018615	1.14224	up	--	--	--	--	--	Uncharacterized protein At4g13230 (Precursor) GN=At4g13230 OS=Arabidopsis thaliana (Mouse-ear cress) PE=2 SV=1	S	Function unknown	Late embryogenesis abundant protein family protein, putative [Theobroma cacao]
gene22611	LOC107431261	1.51071	1.16201	0.899275	1.67357	3.0488	3.12041	0.00791983	1.14119	up	[L]	Replication, recombination and repair	--	--	--	Alpha-ketoglutarate-dependent dioxygenase alkB GN=At1g11780 OS=Arabidopsis thaliana (Mouse-ear cress) PE=2 SV=2	A	RNA processing and modification	PREDICTED: uncharacterized protein LOC105110292 [Populus euphratica]
gene2774	LOC107404288	2.33556	2.0841	1.7209	4.29727	3.7908	6.33388	0.0150962	1.12494	up	--	--	Biological Process: transcription, DNA-templated (GO:0006351);; Biological Process: response to auxin (GO:0009733);; Biological Process: regulation of gene expression (GO:0010468);; Cellular Component: intracellular membrane-bounded organelle (GO:0043231);; Biological Process: regulation of primary metabolic process (GO:0080090);; Biological Process: regulation of cellular macromolecule biosynthe…	K14484|1.91085e-147|pmum:103327885|auxin-responsive protein IAA27-like; K14484 auxin-responsive protein IAA (A)	Plant hormone signal transduction (ko04075)	Auxin-responsive protein IAA27 GN=F19B15.110 OS=Arabidopsis thaliana (Mouse-ear cress) PE=1 SV=1	S	Function unknown	PREDICTED: auxin-responsive protein IAA27-like [Prunus mume]
gene11563	LOC107419267	1.07417	2.22384	1.66031	3.10809	4.41923	2.90862	0.015614	1.12177	up	[R]	General function prediction only	Molecular Function: GTPase activity (GO:0003924);; Molecular Function: GTP binding (GO:0005525);; Biological Process: GTP catabolic process (GO:0006184);;	K17065|2.62759e-79|mdm:103412050|dynamin-related protein 3A-like; K17065 dynamin 1-like protein [EC:3.6.5.5] (A)	--	Dynamin-related protein 3A GN=T16L1.140 OS=Arabidopsis thaliana (Mouse-ear cress) PE=1 SV=2	U	Intracellular trafficking, secretion, and vesicular transport	PREDICTED: dynamin-related protein 3A-like [Malus domestica]
gene18683	LOC107427006	0.102447	0.496983	0.694271	0.848032	0.947146	1.02595	0.0457356	1.09555	up	--	--	Biological Process: metabolic process (GO:0008152);; Molecular Function: limonoid glucosyltransferase activity (GO:0050645);;	--	--	Putative UDP-glucose glucosyltransferase OS=Fragaria ananassa (Strawberry) PE=2 SV=1	CG	Energy production and conversion;; Carbohydrate transport and metabolism	PREDICTED: putative UDP-glucose glucosyltransferase [Prunus mume]
gene27565	LOC107403973	1.42454	0.502146	1.54806	3.50298	2.07084	1.79135	0.0257898	1.08872	up	--	--	--	--	--	--	S	Function unknown	hypothetical protein L484_003734 [Morus notabilis]
gene9196	LOC107416699	4.70289	4.40904	3.45431	16.7955	4.41719	4.80849	0.0277202	1.08824	up	[O]	Posttranslational modification, protein turnover, chaperones	Molecular Function: threonine-type endopeptidase activity (GO:0004298);; Cellular Component: nucleus (GO:0005634);; Cellular Component: vacuole (GO:0005773);; Biological Process: ubiquitin-dependent protein catabolic process (GO:0006511);; Cellular Component: proteasome core complex, alpha-subunit complex (GO:0019773);; Cellular Component: cytosolic ribosome (GO:0022626);; Biological Process: res…	K02728|5.21647e-170|tcc:TCM_005989|20S proteasome alpha subunit C1 isoform 1; K02728 20S proteasome subunit alpha 3 [EC:3.4.25.1] (A)	Proteasome (ko03050)	Proteasome subunit alpha type-4 GN=PAC1 OS=Spinacia oleracea (Spinach) PE=2 SV=1	O	Posttranslational modification, protein turnover, chaperones	Proteasome subunit alpha type-4 [Morus notabilis]
gene16419	LOC107424584	3.73688	3.91382	2.41521	8.61855	6.17725	6.16363	0.000685002	1.08761	up	[Q]	Secondary metabolites biosynthesis, transport and catabolism	Molecular Function: oxidoreductase activity (GO:0016491);; Biological Process: oxidation-reduction process (GO:0055114);;	--	--	Prolycopene isomerase, chloroplastic (Precursor) GN=F4H5.10 OS=Arabidopsis thaliana (Mouse-ear cress) PE=2 SV=2	Q	Secondary metabolites biosynthesis, transport and catabolism	FAD/NAD(P)-binding oxidoreductase family protein [Theobroma cacao]
gene1589	LOC107424282	8.15431	8.41345	8.26902	18.4028	16.3763	17.0876	4.70239e-05	1.08118	up	--	--	Molecular Function: DNA binding (GO:0003677);; Molecular Function: chromatin binding (GO:0003682);;	--	--	Myb family transcription factor APL GN=APL OS=Arabidopsis thaliana (Mouse-ear cress) PE=2 SV=2	K	Transcription	PREDICTED: myb family transcription factor APL isoform X2 [Vitis vinifera]
gene6181	LOC107413385	0.635863	0.472433	1.29872	2.14081	1.4322	1.53414	0.0118572	1.0804	up	--	--	--	--	--	Disease resistance protein RPP8 GN=MWF20.19 OS=Arabidopsis thaliana (Mouse-ear cress) PE=1 SV=2	T	Signal transduction mechanisms	Disease resistance protein RPP8 [Morus notabilis]
gene27130	LOC107403497	0.445614	0.369012	0.192368	0.69454	0.659778	0.733649	0.0283256	1.06286	up	--	--	Molecular Function: structural constituent of cytoskeleton (GO:0005200);; Molecular Function: ATP binding (GO:0005524);; Cellular Component: Arp2/3 protein complex (GO:0005885);; Biological Process: multidimensional cell growth (GO:0009825);; Biological Process: trichome morphogenesis (GO:0010090);; Biological Process: Arp2/3 complex-mediated actin nucleation (GO:0034314);;	K17260|0|vvi:100242912|actin-related protein 2; K17260 actin-related protein 2 (A)	--	Actin-related protein 2 GN=MOJ10.7 OS=Arabidopsis thaliana (Mouse-ear cress) PE=1 SV=1	Z	Cytoskeleton	PREDICTED: actin-related protein 2 [Vitis vinifera]
gene2254	LOC107431569	1.3815	2.80902	1.2324	5.74016	2.49316	2.66161	0.0389978	1.06001	up	--	--	Cellular Component: chloroplast (GO:0009507);;	--	--	--	S	Function unknown	hypothetical protein L484_011904 [Morus notabilis]
gene5563	LOC107412708	7.41991	9.59093	11.1619	18.9283	18.4207	22.0002	9.03566e-05	1.0581	up	[RTKL]	General function prediction only;; Signal transduction mechanisms;; Transcription;; Replication, recombination and repair	Molecular Function: protein serine/threonine kinase activity (GO:0004674);; Molecular Function: ATP binding (GO:0005524);; Biological Process: protein phosphorylation (GO:0006468);;	--	--	Serine/threonine-protein kinase UCNL {ECO:0000305} OS=Arabidopsis thaliana (Mouse-ear cress) PE=2 SV=1	T	Signal transduction mechanisms	Serine/threonine-protein kinase OXI1 [Morus notabilis]
gene1507	LOC107423224	1.26181	2.21832	5.07543	4.16373	5.48204	7.98131	0.0340657	1.0552	up	--	--	Molecular Function: DNA binding (GO:0003677);; Biological Process: regulation of transcription, DNA-templated (GO:0006355);;	--	--	NAC transcription factor 25 GN=At1g61110 OS=Arabidopsis thaliana (Mouse-ear cress) PE=2 SV=1	K	Transcription	NAC domain containing protein 25 [Theobroma cacao]
gene26767	LOC107435829	10.787	11.7676	9.26937	23.6137	20.8524	19.0181	0.0056071	1.04843	up	--	--	--	--	--	--	--	--	hypothetical protein L484_016054 [Morus notabilis]
gene1896	LOC107427743	11.4964	14.8491	7.00272	35.4278	15.2956	19.7771	0.00449455	1.04587	up	[O]	Posttranslational modification, protein turnover, chaperones	Biological Process: protein peptidyl-prolyl isomerization (GO:0000413);; Molecular Function: peptidyl-prolyl cis-trans isomerase activity (GO:0003755);; Biological Process: protein folding (GO:0006457);; Cellular Component: chloroplast (GO:0009507);; Cellular Component: thylakoid lumen (GO:0031977);;	K03768|2.19484e-132|pmum:103341195|peptidyl-prolyl cis-trans isomerase, mitochondrial; K03768 peptidyl-prolyl cis-trans isomerase B (cyclophilin B) [EC:5.2.1.8] (A)	--	Peptidyl-prolyl cis-trans isomerase CYP28, chloroplastic (Precursor) GN=CYP28 OS=Arabidopsis thaliana (Mouse-ear cress) PE=1 SV=1	O	Posttranslational modification, protein turnover, chaperones	hypothetical protein JCGZ_03969 [Jatropha curcas]
gene27977	LOC107404435	1.78327	1.49001	2.4348	3.11155	4.90149	3.55822	0.0146821	1.0223	up	--	--	--	--	--	Zinc finger protein 4 GN=ZFP4 OS=Arabidopsis thaliana (Mouse-ear cress) PE=2 SV=2	R	General function prediction only	Zinc finger protein 7, putative [Theobroma cacao]
gene10262	LOC107417839	1.95794	2.81831	1.57275	5.23679	3.28993	3.96123	0.03265	1.02044	up	--	--	--	--	--	--	S	Function unknown	PREDICTED: uncharacterized protein LOC103454502 [Malus domestica]
gene11263	LOC107418937	1.35692	1.53278	1.34836	2.90759	2.37645	3.39371	0.00339166	1.01673	up	--	--	--	--	--	Ninja-family protein AFP1 OS=Arabidopsis thaliana (Mouse-ear cress) PE=1 SV=1	S	Function unknown	RNA binding-like protein [Theobroma cacao]
gene28098	LOC107404556	0.294323	0.597701	0.841496	1.03186	1.12973	1.30994	0.0397962	1.00778	up	--	--	--	--	--	--	R	General function prediction only	PREDICTED: uncharacterized protein LOC103336604 [Prunus mume]
gene29584	LOC107406174	10.7789	12.0321	18.4634	4.27062	8.53782	7.61827	0.00849315	-1.00288471021086	down	--	--	--	--	--	Uncharacterized protein At5g01610 GN=At5g01610 OS=Arabidopsis thaliana (Mouse-ear cress) PE=1 SV=1	S	Function unknown	hypothetical protein PRUPE_ppa012348mg [Prunus persica]
gene16343	LOC107424505	5.75953	14.1801	12.7769	3.93887	3.8576	8.57953	0.0146934	-1.00342960938894	down	[RTKL]	General function prediction only;; Signal transduction mechanisms;; Transcription;; Replication, recombination and repair	Biological Process: MAPK cascade (GO:0000165);; Molecular Function: nucleotide binding (GO:0000166);; Molecular Function: protein serine/threonine kinase activity (GO:0004674);; Biological Process: protein phosphorylation (GO:0006468);;	--	--	Mitogen-activated protein kinase kinase kinase NPK1 GN=NPK1 OS=Nicotiana tabacum (Common tobacco) PE=1 SV=1	T	Signal transduction mechanisms	hypothetical protein PRUPE_ppa007987mg [Prunus persica]
gene27473	LOC107403879	148.235	413.683	550.87	202.968	123.2	235.918	0.00866668	-1.004549729	down	--	--	--	--	--	--	--	--	--
gene29056	LOC107405594	5.33091	9.46057	7.03287	1.74129	3.46857	5.59438	0.00883186	-1.00570663012894	down	[RTKL]	General function prediction only;; Signal transduction mechanisms;; Transcription;; Replication, recombination and repair	--	--	--	G-type lectin S-receptor-like serine/threonine-protein kinase At1g61550 (Precursor) GN=At1g61550 OS=Arabidopsis thaliana (Mouse-ear cress) PE=2 SV=1	T	Signal transduction mechanisms	PREDICTED: G-type lectin S-receptor-like serine/threonine-protein kinase At1g61500 [Prunus mume]
gene1776	LOC107426671	8.76075	8.71577	16.7519	4.44384	6.1606	6.04244	0.00157812	-1.00606463664667	down	--	--	Cellular Component: integral component of membrane (GO:0016021);;	K17086|0|pmum:103341271|transmembrane 9 superfamily member 4; K17086 transmembrane 9 superfamily member 2/4 (A)	--	Transmembrane 9 superfamily member 9 {ECO:0000305} (Precursor) OS=Arabidopsis thaliana (Mouse-ear cress) PE=2 SV=1	U	Intracellular trafficking, secretion, and vesicular transport	PREDICTED: transmembrane 9 superfamily member 4 [Prunus mume]
gene14440	LOC107422381	1.07431	2.84395	1.94744	0.578857	0.970068	1.29479	0.0337571	-1.00758530615397	down	--	--	--	--	--	--	S	Function unknown	PREDICTED: uncharacterized protein LOC103324630 [Prunus mume]
gene9128	LOC107416623	4.64532	3.34522	6.01759	2.75263	1.6019	2.50675	0.0216995	-1.00842848431535	down	[V]	Defense mechanisms	Biological Process: drug transmembrane transport (GO:0006855);; Molecular Function: drug transmembrane transporter activity (GO:0015238);; Molecular Function: antiporter activity (GO:0015297);; Cellular Component: membrane (GO:0016020);;	K03327|4.11983e-67|cic:CICLE_v10018340mg|hypothetical protein; K03327 multidrug resistance protein, MATE family (A)	--	Protein TRANSPARENT TESTA 12 GN=F17J16_80 OS=Arabidopsis thaliana (Mouse-ear cress) PE=2 SV=1	R	General function prediction only	Protein TRANSPARENT TESTA 12 -like protein [Gossypium arboreum]
gene16147	LOC107424316	3.19643	3.39769	2.30357	1.57965	1.36973	1.553	0.00918589	-1.00932063486037	down	--	--	--	--	--	--	S	Function unknown	PREDICTED: uncharacterized protein LOC100852615 [Vitis vinifera]
gene732	LOC107414858	57.2815	52.6616	173.827	79.8924	36.9603	24.0275	0.0241596	-1.01178034213203	down	[P]	Inorganic ion transport and metabolism	Molecular Function: transporter activity (GO:0005215);; Biological Process: sodium ion transport (GO:0006814);; Cellular Component: membrane (GO:0016020);; Biological Process: transmembrane transport (GO:0055085);;	K14445|0|mdm:103434430|tonoplast dicarboxylate transporter; K14445 solute carrier family 13 (sodium-dependent dicarboxylate transporter), member 2/3/5 (A)	--	Tonoplast dicarboxylate transporter GN=MNJ7.15 OS=Arabidopsis thaliana (Mouse-ear cress) PE=2 SV=2	P	Inorganic ion transport and metabolism	PREDICTED: tonoplast dicarboxylate transporter [Malus domestica]
gene22013	LOC107430644	1.80435	3.22209	3.93824	0.925917	1.26416	2.27491	0.0175481	-1.01402844079724	down	[RTKL]	General function prediction only;; Signal transduction mechanisms;; Transcription;; Replication, recombination and repair	--	--	--	L-type lectin-domain containing receptor kinase IV.1 (Precursor) GN=F13M22.21 OS=Arabidopsis thaliana (Mouse-ear cress) PE=2 SV=1	T	Signal transduction mechanisms	PREDICTED: L-type lectin-domain containing receptor kinase IV.1-like [Pyrus x bretschneideri]
jujube_newGene_1729	--	9.11798	10.7853	7.84322	2.69798	4.74132	6.37065	0.00368967	-1.01557904236131	down	--	--	Cellular Component: nucleus (GO:0005634);; Cellular Component: Golgi apparatus (GO:0005794);; Cellular Component: plasma membrane (GO:0005886);; Molecular Function: methyltransferase activity (GO:0008168);; Molecular Function: zinc ion binding (GO:0008270);; Biological Process: methylation (GO:0032259);;	--	--	Probable methyltransferase PMT3 GN=At4g14360 OS=Arabidopsis thaliana (Mouse-ear cress) PE=2 SV=1	R	General function prediction only	PREDICTED: probable methyltransferase PMT3 [Populus euphratica]
gene10632	LOC107418254	6.23458	12.2477	20.8155	4.85647	7.00439	7.64963	0.00942254	-1.01626325011901	down	--	--	Molecular Function: transcription cofactor activity (GO:0003712);; Molecular Function: histone acetyltransferase activity (GO:0004402);; Cellular Component: nucleus (GO:0005634);; Biological Process: regulation of transcription, DNA-templated (GO:0006355);; Molecular Function: zinc ion binding (GO:0008270);; Biological Process: histone acetylation (GO:0016573);;	--	--	BTB/POZ and TAZ domain-containing protein 1 GN=BT1 OS=Arabidopsis thaliana (Mouse-ear cress) PE=1 SV=1	K	Transcription	hypothetical protein PRUPE_ppa006416mg [Prunus persica]
gene10201	LOC107417773	7.84546	9.42996	20.5254	5.28723	6.15108	7.24542	0.0195713	-1.01929451407702	down	--	--	--	--	--	Dirigent protein 23 (Precursor) GN=DIR23 OS=Arabidopsis thaliana (Mouse-ear cress) PE=2 SV=1	R	General function prediction only	hypothetical protein PRUPE_ppa019658mg [Prunus persica]
gene27114	LOC107403487	17.7012	15.09	33.7586	12.6162	9.37443	10.9527	0.00126708	-1.01931914001498	down	--	--	Biological Process: metabolic process (GO:0008152);; Molecular Function: transferase activity, transferring hexosyl groups (GO:0016758);;	--	--	7-deoxyloganetin glucosyltransferase GN=UGT85A24 OS=Gardenia jasminoides (Cape jasmine) PE=1 SV=1	CG	Energy production and conversion;; Carbohydrate transport and metabolism	hypothetical protein PRUPE_ppa015357mg [Prunus persica]
gene15553	LOC107423634	2.78994	2.75367	4.82476	1.42044	1.52092	2.20635	0.0161403	-1.02025903874596	down	--	--	--	--	--	Uncharacterized protein At4g00950 GN=At4g00950 OS=Arabidopsis thaliana (Mouse-ear cress) PE=2 SV=1	S	Function unknown	PREDICTED: uncharacterized protein At4g00950 [Prunus mume]
gene12984	LOC107420822	2.53365	3.02031	4.00409	0.957096	1.45934	2.31712	0.0116095	-1.02084943315848	down	[R]	General function prediction only	--	K09527|0|pmum:103319855|TPR repeat-containing thioredoxin TTL1; K09527 DnaJ homolog subfamily C member 7 (A)	--	TPR repeat-containing thioredoxin TTL1 GN=TTL1 OS=Arabidopsis thaliana (Mouse-ear cress) PE=1 SV=1	R	General function prediction only	PREDICTED: TPR repeat-containing thioredoxin TTL1 [Prunus mume]
gene27421	LOC107403814	1.53947	1.21484	2.0637	0.637822	0.87686	0.851519	0.00840421	-1.02352315983293	down	[RTKL]	General function prediction only;; Signal transduction mechanisms;; Transcription;; Replication, recombination and repair	Molecular Function: protein serine/threonine kinase activity (GO:0004674);; Molecular Function: protein tyrosine kinase activity (GO:0004713);; Molecular Function: ATP binding (GO:0005524);; Biological Process: protein phosphorylation (GO:0006468);;	--	--	Protein kinase PVPK-1 OS=Phaseolus vulgaris (Kidney bean) PE=2 SV=1	T	Signal transduction mechanisms	Protein kinase PVPK-1 [Morus notabilis]
gene18386	LOC107426811	9.47312	14.8831	20.718	7.30084	4.89182	10.0033	0.00245019	-1.02437760882536	down	[H]	Coenzyme transport and metabolism	Biological Process: protoporphyrinogen IX biosynthetic process (GO:0006782);; Molecular Function: glutamyl-tRNA reductase activity (GO:0008883);; Cellular Component: chloroplast (GO:0009507);; Biological Process: chlorophyll biosynthetic process (GO:0015995);; Molecular Function: NADP binding (GO:0050661);; Biological Process: oxidation-reduction process (GO:0055114);;	K02492|0|pmum:103335812|glutamyl-tRNA reductase 2, chloroplastic-like; K02492 glutamyl-tRNA reductase [EC:1.2.1.70] (A)	Porphyrin and chlorophyll metabolism (ko00860)	Glutamyl-tRNA reductase 2, chloroplastic (Precursor) GN=HEMA2 OS=Cucumis sativus (Cucumber) PE=2 SV=1	H	Coenzyme transport and metabolism	PREDICTED: glutamyl-tRNA reductase 2, chloroplastic-like [Prunus mume]
gene23639	LOC107432422	4.69413	6.43017	3.30585	1.82312	2.45458	2.76624	0.0017339	-1.02438931996391	down	--	--	--	--	--	--	S	Function unknown	PREDICTED: uncharacterized protein LOC103339339 [Prunus mume]
gene22231	LOC107430870	5.16212	8.00955	7.56458	1.91736	3.86949	4.62914	0.00804359	-1.02461748437456	down	[H]	Coenzyme transport and metabolism	--	--	--	Uroporphyrinogen-III C-methyltransferase GN=cobA OS=Cyanidium caldarium PE=3 SV=1	H	Coenzyme transport and metabolism	PREDICTED: uroporphyrinogen-III C-methyltransferase [Prunus mume]
gene28477	LOC107404981	10.2178	20.1854	31.2041	11.7473	6.0559	12.0594	0.00757392	-1.0284696723164	down	--	--	--	K13464|9.14229e-109|pper:PRUPE_ppa009778mg|hypothetical protein; K13464 jasmonate ZIM domain-containing protein (A)	Plant hormone signal transduction (ko04075)	Protein TIFY 10A GN=T29M8.5 OS=Arabidopsis thaliana (Mouse-ear cress) PE=1 SV=1	S	Function unknown	hypothetical protein PRUPE_ppa009778mg [Prunus persica]
gene6654	LOC107413918	12.4412	24.6287	64.039	17.7149	15.1356	16.7537	0.0158025	-1.02847925070942	down	[RTKL]	General function prediction only;; Signal transduction mechanisms;; Transcription;; Replication, recombination and repair	--	--	--	Inactive receptor-like serine/threonine-protein kinase At2g40270 (Precursor) GN=At2g40270 OS=Arabidopsis thaliana (Mouse-ear cress) PE=2 SV=2	T	Signal transduction mechanisms	PREDICTED: probable inactive receptor-like protein kinase At3g56050 [Prunus mume]
gene9210	LOC107416691	0.940082	2.00851	1.53947	0.536898	0.596254	1.02611	0.0432249	-1.03212542761613	down	--	--	Molecular Function: transferase activity, transferring glycosyl groups (GO:0016757);;	--	--	Putative UDP-glucose flavonoid 3-O-glucosyltransferase 3 {ECO:0000250|UniProtKB:Q2V6K0} OS=Fragaria ananassa (Strawberry) PE=2 SV=1	CG	Energy production and conversion;; Carbohydrate transport and metabolism	PREDICTED: putative UDP-glucose flavonoid 3-O-glucosyltransferase 3 [Prunus mume]
gene7605	LOC107414982	31.3014	54.5707	65.8126	21.6405	26.4664	26.7588	0.00105615	-1.03272591288094	down	[QR]	Secondary metabolites biosynthesis, transport and catabolism;; General function prediction only	Biological Process: lignin biosynthetic process (GO:0009809);; Molecular Function: catechol O-methyltransferase activity (GO:0016206);; Biological Process: methylation (GO:0032259);; Molecular Function: protein dimerization activity (GO:0046983);; Molecular Function: caffeate O-methyltransferase activity (GO:0047763);;	K13066|5.22057e-144|pmum:103333559|caffeic acid 3-O-methyltransferase; K13066 caffeic acid 3-O-methyltransferase [EC:2.1.1.68] (A)	Phenylpropanoid biosynthesis (ko00940)	Caffeic acid 3-O-methyltransferase GN=COMT1 OS=Prunus dulcis (Almond) PE=2 SV=1	R	General function prediction only	PREDICTED: caffeic acid 3-O-methyltransferase [Prunus mume]
gene430	LOC107411331	24.7548	29.6115	57.4338	15.2665	21.596	18.0075	0.000639112	-1.03315787311051	down	[RTKL]	General function prediction only;; Signal transduction mechanisms;; Transcription;; Replication, recombination and repair	Molecular Function: calmodulin-dependent protein kinase activity (GO:0004683);; Molecular Function: ATP binding (GO:0005524);; Biological Process: protein phosphorylation (GO:0006468);; Biological Process: signal transduction (GO:0007165);;	--	--	CBL-interacting serine/threonine-protein kinase 12 GN=F28A21.110 OS=Arabidopsis thaliana (Mouse-ear cress) PE=1 SV=1	T	Signal transduction mechanisms	PREDICTED: CBL-interacting serine/threonine-protein kinase 12-like [Prunus mume]
gene2127	LOC107430493	8.58784	7.50126	26.0574	8.82286	4.94524	7.08009	0.0126044	-1.03436902356088	down	--	--	Biological Process: ion transport (GO:0006811);; Cellular Component: integral component of membrane (GO:0016021);;	--	--	Cyclic nucleotide-gated ion channel 4 GN=MDK4.7 OS=Arabidopsis thaliana (Mouse-ear cress) PE=2 SV=2	P	Inorganic ion transport and metabolism	hypothetical protein L484_018733 [Morus notabilis]
gene343	LOC107410287	2.09755	2.0175	8.10673	1.31242	2.25807	2.48318	0.0457822	-1.03649981669951	down	[E]	Amino acid transport and metabolism	--	K01703|0|pper:PRUPE_ppa004448mg|hypothetical protein; K01703 3-isopropylmalate/(R)-2-methylmalate dehydratase large subunit [EC:4.2.1.33 4.2.1.35] (A)	Valine, leucine and isoleucine biosynthesis (ko00290);; C5-Branched dibasic acid metabolism (ko00660);; 2-Oxocarboxylic acid metabolism (ko01210);; Biosynthesis of amino acids (ko01230)	3-isopropylmalate dehydratase large subunit (Precursor) GN=IIL1 OS=Arabidopsis thaliana (Mouse-ear cress) PE=1 SV=1	E	Amino acid transport and metabolism	hypothetical protein PRUPE_ppa004448mg [Prunus persica]
gene16634	LOC107424852	8.94334	12.8098	15.9259	6.1921	5.80876	10.3093	0.00328805	-1.03897802135349	down	--	--	Biological Process: response to sucrose (GO:0009744);; Biological Process: response to glucose (GO:0009749);; Biological Process: response to fructose (GO:0009750);;	--	--	Cold-regulated 413 plasma membrane protein 4 GN=At4g37220 OS=Arabidopsis thaliana (Mouse-ear cress) PE=2 SV=2	S	Function unknown	PREDICTED: cold-regulated 413 plasma membrane protein 4-like [Fragaria vesca subsp. vesca]
gene972	LOC107417503	31.0741	44.8584	51.6672	27.898	16.0939	17.8782	0.000154632	-1.03903936443044	down	--	--	--	--	--	Probable amino acid permease 7 GN=AAP7 OS=Arabidopsis thaliana (Mouse-ear cress) PE=1 SV=1	E	Amino acid transport and metabolism	PREDICTED: probable amino acid permease 7 isoform X2 [Malus domestica]
gene28057	LOC107404515	3.35053	5.1744	10.749	3.15334	3.36099	2.82321	0.00965739	-1.03964882127383	down	[R]	General function prediction only	Cellular Component: plasma membrane (GO:0005886);; Molecular Function: zinc ion binding (GO:0008270);; Biological Process: salicylic acid biosynthetic process (GO:0009697);; Biological Process: response to ethylene (GO:0009723);; Biological Process: abscisic acid-activated signaling pathway (GO:0009738);; Biological Process: salicylic acid mediated signaling pathway (GO:0009863);; Biological Proc…	K16675|0|fve:101292593|probable S-acyltransferase At3g26935-like; K16675 palmitoyltransferase ZDHHC9/14/18 [EC:2.3.1.225] (A)	--	Probable protein S-acyltransferase 7 GN=PAT07 OS=Arabidopsis thaliana (Mouse-ear cress) PE=1 SV=1	R	General function prediction only	putative S-acyltransferase [Morus notabilis]
gene10873	LOC107418515	10.3199	9.33364	15.6027	8.01685	4.83753	5.3992	0.00387543	-1.04022469657449	down	--	--	--	--	--	Uncharacterized protein At3g17950 GN=Y-3 OS=Arabidopsis thaliana (Mouse-ear cress) PE=1 SV=1	S	Function unknown	hypothetical protein L484_008807 [Morus notabilis]
gene20517	LOC107429018	5.98202	14.9563	25.3995	6.72872	6.74771	8.95059	0.00707621	-1.04213294007876	down	--	--	Cellular Component: Golgi apparatus (GO:0005794);; Biological Process: protein glycosylation (GO:0006486);; Molecular Function: UDP-galactose:N-glycan beta-1,3-galactosyltransferase activity (GO:0010488);; Biological Process: Lewis a epitope biosynthetic process (GO:0010493);; Cellular Component: integral component of membrane (GO:0016021);; Molecular Function: carbohydrate binding (GO:0030246);;…	K14413|0|pper:PRUPE_ppa002802mg|hypothetical protein; K14413 beta-1,3-galactosyltransferase [EC:2.4.1.-] (A)	--	Beta-1,3-galactosyltransferase 15 GN=T24P13.20 OS=Arabidopsis thaliana (Mouse-ear cress) PE=2 SV=1	W	Extracellular structures	Beta-1,3-galactosyltransferase 15 [Morus notabilis]
gene10369	LOC107417974	32.5719	38.5697	123.49	32.6043	35.3814	26.2111	0.00815283	-1.04575742471377	down	--	--	--	--	--	BTB/POZ domain-containing protein At1g04390 GN=At1g04390 OS=Arabidopsis thaliana (Mouse-ear cress) PE=2 SV=3	R	General function prediction only	PREDICTED: BTB/POZ domain-containing protein At1g04390 isoform X1 [Prunus mume]
gene30564	LOC107407227	7.84603	10.5244	15.8397	5.21532	5.15333	6.05386	0.0211284	-1.04755301213584	down	--	--	--	K09645|3.91484e-60|fve:101300046|serine carboxypeptidase-like 50-like; K09645 vitellogenic carboxypeptidase-like protein [EC:3.4.16.-] (A)	--	Serine carboxypeptidase-like 50 (Precursor) GN=SCPL50 OS=Arabidopsis thaliana (Mouse-ear cress) PE=2 SV=1	O	Posttranslational modification, protein turnover, chaperones	PREDICTED: serine carboxypeptidase-like 50-like [Fragaria vesca subsp. vesca]
gene11205	LOC107418882	1.64484	4.63349	4.47895	1.63564	2.12399	1.52932	0.0209392	-1.04930947494311	down	[C]	Energy production and conversion	Molecular Function: L-lactate dehydrogenase activity (GO:0004459);; Cellular Component: cytoplasm (GO:0005737);; Biological Process: glycolytic process (GO:0006096);; Biological Process: cellular carbohydrate metabolic process (GO:0044262);; Biological Process: oxidation-reduction process (GO:0055114);;	K00016|0|mdm:103403474|L-lactate dehydrogenase B; K00016 L-lactate dehydrogenase [EC:1.1.1.27] (A)	Glycolysis / Gluconeogenesis (ko00010);; Cysteine and methionine metabolism (ko00270);; Pyruvate metabolism (ko00620);; Propanoate metabolism (ko00640)	L-lactate dehydrogenase A OS=Hordeum vulgare (Barley) PE=1 SV=1	C	Energy production and conversion	L-lactate dehydrogenase B [Gossypium arboreum]
gene16956	LOC107425160	3.90658	4.13764	7.50028	2.26995	2.72598	2.55643	0.000805332	-1.0497011626378	down	--	--	--	--	--	--	S	Function unknown	hypothetical protein PRUPE_ppa026542mg [Prunus persica]
gene6861	LOC107414129	0.592604	1.21246	1.10764	0.43037	0.387945	0.594547	0.0164348	-1.05009653014942	down	[S]	Function unknown	--	--	--	Receptor-like protein 12 (Precursor) GN=RLP12 OS=Arabidopsis thaliana (Mouse-ear cress) PE=2 SV=2	R	General function prediction only	PREDICTED: LRR receptor-like serine/threonine-protein kinase FLS2 [Malus domestica]
gene13182	LOC107421061	19.2468	31.4617	54.1307	24.6035	12.1123	13.8993	0.00500821	-1.05026662646026	down	--	--	Biological Process: lipid metabolic process (GO:0006629);; Molecular Function: hydrolase activity, acting on ester bonds (GO:0016788);;	--	--	Esterase (Precursor) OS=Hevea brasiliensis (Para rubber tree) PE=1 SV=1	I	Lipid transport and metabolism	PREDICTED: LOW QUALITY PROTEIN: esterase-like [Prunus mume]
gene7209	LOC107414521	6.8315	12.087	8.37015	2.35526	5.63826	5.35371	0.00627111	-1.05167132218222	down	[Z]	Cytoskeleton	Molecular Function: GTPase activity (GO:0003924);; Molecular Function: structural constituent of cytoskeleton (GO:0005200);; Molecular Function: protein binding (GO:0005515);; Molecular Function: GTP binding (GO:0005525);; Cellular Component: Golgi apparatus (GO:0005794);; Cellular Component: microtubule (GO:0005874);; Biological Process: gluconeogenesis (GO:0006094);; Biological Process: GTP cat…	K07375|0|cic:CICLE_v10004755mg|hypothetical protein; K07375 tubulin beta (A)	Phagosome (ko04145)	Tubulin beta-8 chain GN=MRO11.10 OS=Arabidopsis thaliana (Mouse-ear cress) PE=2 SV=2	Z	Cytoskeleton	hypothetical protein CICLE_v10004755mg [Citrus clementina]
gene22448	LOC107431123	23.3567	23.6694	46.1453	10.1556	16.64	18.5702	0.00431758	-1.05222700415299	down	--	--	--	--	--	RING-H2 finger protein ATL33 GN=ATL33 OS=Arabidopsis thaliana (Mouse-ear cress) PE=2 SV=2	O	Posttranslational modification, protein turnover, chaperones	PREDICTED: RING-H2 finger protein ATL33-like [Malus domestica]
gene445	LOC107411800	4.9287	5.90971	9.94655	2.57176	3.55308	3.99295	0.00707971	-1.05942497903767	down	--	--	--	--	--	--	R	General function prediction only	PREDICTED: OPA3-like protein [Vitis vinifera]
gene5066	LOC107412127	0.86829	0.817526	1.04538	0.278803	0.428852	0.629485	0.0380269	-1.06160045687965	down	--	--	--	--	--	Pentatricopeptide repeat-containing protein At3g18970 GN=PCMP-E93 OS=Arabidopsis thaliana (Mouse-ear cress) PE=2 SV=1	R	General function prediction only	hypothetical protein L484_004418 [Morus notabilis]
gene10498	LOC107418102	48.6159	50.947	163.483	42.9435	45.0473	37.9964	0.00457936	-1.06360324561383	down	--	--	Molecular Function: protein binding (GO:0005515);; Cellular Component: cell wall (GO:0005618);; Cellular Component: mitochondrion (GO:0005739);; Cellular Component: plasma membrane (GO:0005886);; Biological Process: transport (GO:0006810);; Cellular Component: chloroplast (GO:0009507);; Cellular Component: integral component of membrane (GO:0016021);;	K15102|1.10775e-168|cit:102607266|mitochondrial phosphate carrier protein 3, mitochondrial-like; K15102 solute carrier family 25 (mitochondrial phosphate transporter), member 3 (A)	--	Mitochondrial phosphate carrier protein 3, mitochondrial (Precursor) GN=MUA22_4 OS=Arabidopsis thaliana (Mouse-ear cress) PE=1 SV=1	C	Energy production and conversion	mitochondrial phosphate translocator [Betula pendula]
gene24232	LOC107433066	1.52954	3.66861	3.95616	1.11958	1.24362	1.80832	0.0216074	-1.06449915066137	down	--	--	Molecular Function: acetylglucosaminyltransferase activity (GO:0008375);; Cellular Component: membrane (GO:0016020);;	--	--	--	G	Carbohydrate transport and metabolism	PREDICTED: xylosyltransferase 1-like [Pyrus x bretschneideri]
gene5356	LOC107412514	10.6071	20.2413	42.4277	12.4508	9.64213	11.503	0.0101765	-1.06495006486481	down	--	--	Molecular Function: protein tyrosine phosphatase activity (GO:0004725);; Biological Process: peptidyl-tyrosine dephosphorylation (GO:0035335);;	K18045|3.94519e-115|tcc:TCM_025250|Tyrosine phosphatase family protein; K18045 tyrosine-protein phosphatase SIW14 [EC:3.1.3.48] (A)	--	Probable tyrosine-protein phosphatase At1g05000 GN=At1g05000 OS=Arabidopsis thaliana (Mouse-ear cress) PE=1 SV=1	V	Defense mechanisms	putative tyrosine-protein phosphatase [Morus notabilis]
gene6750	LOC107413997	16.7873	23.0428	49.4713	14.5156	14.6404	13.1589	0.00328571	-1.06932375227682	down	--	--	Biological Process: anthocyanin-containing compound biosynthetic process (GO:0009718);; Biological Process: response to sucrose (GO:0009744);; Biological Process: response to UV-B (GO:0010224);; Biological Process: cellular modified amino acid biosynthetic process (GO:0042398);; Molecular Function: chalcone isomerase activity (GO:0045430);;	--	--	Probable chalcone--flavonone isomerase 3 GN=K18I23.7 OS=Arabidopsis thaliana (Mouse-ear cress) PE=1 SV=1	R	General function prediction only	hypothetical protein CICLE_v10032749mg [Citrus clementina]
gene3180	LOC107409203	26.5839	40.7133	95.1949	23.7782	24.1604	29.4309	0.0027885	-1.0711764592242	down	--	--	Molecular Function: inorganic anion exchanger activity (GO:0005452);; Biological Process: anion transport (GO:0006820);; Cellular Component: integral component of membrane (GO:0016021);;	--	--	Boron transporter 4 GN=BOR4 OS=Arabidopsis thaliana (Mouse-ear cress) PE=2 SV=1	P	Inorganic ion transport and metabolism	Boron transporter, putative [Theobroma cacao]
gene10705	LOC107418332	15.7296	10.4896	4.01186	3.27263	5.60274	5.50652	0.0100434	-1.07619557351123	down	[Q]	Secondary metabolites biosynthesis, transport and catabolism	Molecular Function: oxidoreductase activity (GO:0016491);; Molecular Function: metal ion binding (GO:0046872);;	--	--	Cytochrome P450 71A26 GN=CYP71A26 OS=Arabidopsis thaliana (Mouse-ear cress) PE=3 SV=1	Q	Secondary metabolites biosynthesis, transport and catabolism	PREDICTED: cytochrome P450 71A3-like [Pyrus x bretschneideri]
gene7188	LOC107414482	36.328	59.0735	53.199	17.0806	24.4564	28.9794	0.000471983	-1.07806756819553	down	--	--	Biological Process: metal ion transport (GO:0030001);; Molecular Function: metal ion binding (GO:0046872);;	--	--	--	S	Function unknown	hypothetical protein L484_001022 [Morus notabilis]
gene28435	LOC107404928	11.202	15.6732	22.3385	7.95631	7.44203	7.75883	4.26947e-05	-1.07993540962473	down	--	--	Cellular Component: plasmodesma (GO:0009506);; Cellular Component: chloroplast (GO:0009507);;	--	--	C2 and GRAM domain-containing protein At1g03370 GN=At1g03370 OS=Arabidopsis thaliana (Mouse-ear cress) PE=2 SV=4	R	General function prediction only	PREDICTED: multiple C2 and transmembrane domain-containing protein 2-like [Fragaria vesca subsp. vesca]
gene32253	LOC107409054	39.7425	32.5561	93.091	22.8994	28.9078	25.8191	0.00123057	-1.07998047282787	down	[EH]	Amino acid transport and metabolism;; Coenzyme transport and metabolism	--	K12261|2.32949e-133|pmum:103328654|2-hydroxyacyl-CoA lyase; K12261 2-hydroxyacyl-CoA lyase 1 [EC:4.1.-.-] (A)	Peroxisome (ko04146)	2-hydroxyacyl-CoA lyase OS=Oryza sativa subsp. japonica (Rice) PE=3 SV=3	EH	Amino acid transport and metabolism;; Coenzyme transport and metabolism	2-hydroxyacyl-CoA lyase [Morus notabilis]
jujube_newGene_1196	--	2.92507	3.9817	6.67114	2.00236	2.15517	2.22333	0.00080229	-1.08044938334678	down	[V]	Defense mechanisms	--	K08869|9.76406e-56|pmum:103320134|uncharacterized LOC103320134; K08869 aarF domain-containing kinase (A)	--	--	R	General function prediction only	PREDICTED: uncharacterized protein LOC103320134 isoform X2 [Prunus mume]
gene11396	LOC107419097	2.51021	3.79536	0.787243	1.03915	1.15878	1.11613	0.044274	-1.08122231289625	down	--	--	Molecular Function: (1->3)-beta-D-glucan binding (GO:0001872);; Cellular Component: plasma membrane (GO:0005886);; Cellular Component: plasmodesma (GO:0009506);; Cellular Component: anchored component of membrane (GO:0031225);;	--	--	PLASMODESMATA CALLOSE-BINDING PROTEIN 3 (Precursor) GN=PDCB3 OS=Arabidopsis thaliana (Mouse-ear cress) PE=1 SV=1	R	General function prediction only	PREDICTED: PLASMODESMATA CALLOSE-BINDING PROTEIN 3 [Vitis vinifera]
gene15666	LOC107423762	4.11724	8.18985	4.63565	3.16652	2.06404	2.78907	0.0190263	-1.08329041728088	down	--	--	--	--	--	--	S	Function unknown	hypothetical protein JCGZ_07115 [Jatropha curcas]
gene5490	LOC107412659	9.80257	10.0122	2.99572	3.26488	3.87121	3.71347	0.00539111	-1.0836179230875	down	--	--	Molecular Function: iron ion binding (GO:0005506);; Molecular Function: linoleate 13S-lipoxygenase activity (GO:0016165);; Biological Process: oxylipin biosynthetic process (GO:0031408);; Biological Process: oxidation-reduction process (GO:0055114);;	K00454|0|pper:PRUPE_ppa000968mg|hypothetical protein; K00454 lipoxygenase [EC:1.13.11.12] (A)	Linoleic acid metabolism (ko00591);; alpha-Linolenic acid metabolism (ko00592)	Linoleate 13S-lipoxygenase 2-1, chloroplastic (Precursor) GN=LOX2.1 OS=Solanum tuberosum (Potato) PE=1 SV=1	E	Amino acid transport and metabolism	hypothetical protein PRUPE_ppa000968mg [Prunus persica]
gene21704	LOC107430302	117.355	180.893	122.764	72.3904	43.7417	81.8793	4.79123e-05	-1.08775835555337	down	[G]	Carbohydrate transport and metabolism	Cellular Component: plant-type vacuole (GO:0000325);; Molecular Function: sucrose alpha-glucosidase activity (GO:0004575);; Biological Process: carbohydrate metabolic process (GO:0005975);; Cellular Component: plant-type cell wall (GO:0009505);; Molecular Function: bile-acid-CoA hydrolase activity (GO:0033881);; Molecular Function: sucrose 1F-fructosyltransferase activity (GO:0050306);; Molecular…	K01193|0|pmum:103337231|acid beta-fructofuranosidase-like; K01193 beta-fructofuranosidase [EC:3.2.1.26] (A)	Galactose metabolism (ko00052);; Starch and sucrose metabolism (ko00500)	Acid beta-fructofuranosidase 38 kDa subunit (Precursor) GN=INVA OS=Vigna radiata var. radiata (Mung bean) PE=1 SV=1	G	Carbohydrate transport and metabolism	Acid beta-fructofuranosidase [Morus notabilis]
gene7229	LOC107414526	6.2279	5.45878	10.358	3.43664	3.44082	3.51016	0.000216969	-1.09016142609433	down	[V]	Defense mechanisms	Molecular Function: ATP binding (GO:0005524);; Biological Process: ATP catabolic process (GO:0006200);; Cellular Component: integral component of membrane (GO:0016021);; Molecular Function: 2-alkenal reductase [NAD(P)] activity (GO:0032440);; Molecular Function: ATPase activity, coupled to transmembrane movement of substances (GO:0042626);; Biological Process: transmembrane transport (GO:0055085)…	--	--	ABC transporter C family member 10 GN=F17J16.190 OS=Arabidopsis thaliana (Mouse-ear cress) PE=2 SV=2	Q	Secondary metabolites biosynthesis, transport and catabolism	ABC transporter C family member 10 [Morus notabilis]
gene26645	LOC107435712	44.4121	98.5741	171.126	47.0496	42.1086	57.9176	0.00289933	-1.09050063145711	down	--	--	--	--	--	U-box domain-containing protein 28 GN=PUB28 OS=Arabidopsis thaliana (Mouse-ear cress) PE=1 SV=1	R	General function prediction only	PREDICTED: U-box domain-containing protein 28-like [Prunus mume]
gene11923	LOC107419704	1.38536	1.44138	1.66182	0.220976	0.847034	1.06447	0.025981	-1.09074263134238	down	[S]	Function unknown	Biological Process: transmembrane transport (GO:0055085);;	--	--	Probable metal-nicotianamine transporter YSL8 GN=YSL8 OS=Arabidopsis thaliana (Mouse-ear cress) PE=1 SV=2	P	Inorganic ion transport and metabolism	putative metal-nicotianamine transporter YSL7 [Morus notabilis]
gene12897	LOC107420747	0.528133	1.01822	1.26882	0.286811	0.324855	0.665385	0.0362164	-1.09167421644755	down	[V]	Defense mechanisms	Biological Process: drug transmembrane transport (GO:0006855);; Molecular Function: drug transmembrane transporter activity (GO:0015238);; Molecular Function: antiporter activity (GO:0015297);; Cellular Component: membrane (GO:0016020);;	K03327|0|fve:101308088|protein TRANSPARENT TESTA 12-like; K03327 multidrug resistance protein, MATE family (A)	--	Protein TRANSPARENT TESTA 12 GN=F17J16_80 OS=Arabidopsis thaliana (Mouse-ear cress) PE=2 SV=1	R	General function prediction only	PREDICTED: protein TRANSPARENT TESTA 12-like [Fragaria vesca subsp. vesca]
gene14733	LOC107422768	0.757058	1.62003	0.729339	0.355587	0.475891	0.610859	0.0230623	-1.092825459172	down	[I]	Lipid transport and metabolism	Biological Process: pentacyclic triterpenoid biosynthetic process (GO:0019745);; Molecular Function: lupeol synthase activity (GO:0042299);; Biological Process: cuticle development (GO:0042335);;	K15813|0|pmum:103327456|beta-amyrin synthase-like; K15813 beta-amyrin synthase [EC:5.4.99.39] (A)	Sesquiterpenoid and triterpenoid biosynthesis (ko00909)	Lupeol synthase OS=Ricinus communis (Castor bean) PE=1 SV=1	I	Lipid transport and metabolism	hypothetical protein L484_012176 [Morus notabilis]
gene9546	LOC107417069	5.0332	6.52535	8.29593	1.82264	3.86552	3.52363	0.00338597	-1.09304067987416	down	--	--	Cellular Component: plasma membrane (GO:0005886);; Cellular Component: anchored component of membrane (GO:0031225);;	--	--	Uncharacterized GPI-anchored protein At1g61900 (Precursor) GN=At1g61900 OS=Arabidopsis thaliana (Mouse-ear cress) PE=1 SV=1	R	General function prediction only	PREDICTED: uncharacterized GPI-anchored protein At1g61900-like [Fragaria vesca subsp. vesca]
gene28597	LOC107405107	6.47846	6.60307	17.3473	5.53208	3.2258	6.15874	0.0094181	-1.09316051926871	down	--	--	--	--	--	--	S	Function unknown	PREDICTED: uncharacterized protein LOC103322754 [Prunus mume]
gene18008	LOC107426263	17.4178	25.106	28.3812	11.8961	9.46279	11.7544	6.855e-05	-1.09322501324581	down	--	--	--	K09286|2.12254e-109|pper:PRUPE_ppa008730mg|hypothetical protein; K09286 EREBP-like factor (A)	--	Ethylene-responsive transcription factor RAP2-3 OS=Arabidopsis thaliana (Mouse-ear cress) PE=1 SV=2	K	Transcription	hypothetical protein PRUPE_ppa008730mg [Prunus persica]
gene19814	LOC107428263	5.4476	5.40211	18.6375	7.0165	3.68393	2.98418	0.0249974	-1.09387116390066	down	--	--	--	--	--	--	S	Function unknown	hypothetical protein L484_026553 [Morus notabilis]
gene1214	LOC107420715	88.5302	147.873	381.265	86.8126	86.3281	114.709	0.00487644	-1.09408692609424	down	[EH]	Amino acid transport and metabolism;; Coenzyme transport and metabolism	--	K05907|0|vvi:100854884|5'-adenylylsulfate reductase 3, chloroplastic; K05907 adenylyl-sulfate reductase (glutathione) [EC:1.8.4.9] (A)	Sulfur metabolism (ko00920)	5&apos;-adenylylsulfate reductase 1, chloroplastic (Precursor) GN=F4H6.13 OS=Arabidopsis thaliana (Mouse-ear cress) PE=1 SV=2	E	Amino acid transport and metabolism	5&apos;-adenylylsulfate reductase 1 [Morus notabilis]
gene656	LOC107413887	3.60866	6.73187	1.44005	1.55721	2.15732	1.8778	0.0248866	-1.0973919754067	down	--	--	--	--	--	Auxilin-related protein 1 GN=At4g12780 OS=Arabidopsis thaliana (Mouse-ear cress) PE=1 SV=2	O	Posttranslational modification, protein turnover, chaperones	PREDICTED: J domain-containing protein required for chloroplast accumulation response 1 isoform X1 [Prunus mume]
gene5847	LOC107413046	65.8259	113.466	124.503	40.8059	50.8742	50.0245	1.22986e-05	-1.09876590176097	down	[I]	Lipid transport and metabolism	--	K01597|0|pper:PRUPE_ppa006290mg|hypothetical protein; K01597 diphosphomevalonate decarboxylase [EC:4.1.1.33] (A)	Terpenoid backbone biosynthesis (ko00900)	--	I	Lipid transport and metabolism	PREDICTED: diphosphomevalonate decarboxylase-like [Nicotiana sylvestris]
gene17507	LOC107425754	7.13927	17.0867	26.8907	4.96559	4.45208	14.3403	0.0286802	-1.09906657787306	down	[KAD]	Transcription;; RNA processing and modification;; Cell cycle control, cell division, chromosome partitioning	Molecular Function: binding (GO:0005488);;	K09422|3.0475e-97|tcc:TCM_004046|Myb domain protein 13, putative; K09422 myb proto-oncogene protein, plant (A)	--	Myb-related protein Myb4 GN=OSJNBa0073E02.6 OS=Oryza sativa subsp. japonica (Rice) PE=2 SV=2	K	Transcription	Myb domain protein 13, putative [Theobroma cacao]
gene17856	LOC107426112	10.2244	25.8374	32.1896	9.95037	11.6139	10.4318	0.00255381	-1.09936190054721	down	--	--	--	--	--	--	S	Function unknown	hypothetical protein PRUPE_ppa008545mg [Prunus persica]
gene10412	LOC107418028	1.71989	1.58404	3.3655	1.02926	0.747985	1.28947	0.00750397	-1.10987634503016	down	--	--	--	--	--	--	S	Function unknown	PREDICTED: uncharacterized protein LOC103338077 [Prunus mume]
gene9306	LOC107416804	10.201	24.9362	49.0572	10.1455	10.7081	17.6678	0.0143811	-1.11157096094468	down	--	--	--	--	--	--	S	Function unknown	hypothetical protein L484_006882 [Morus notabilis]
gene8923	LOC107416390	11.5711	17.5967	31.9175	9.32052	8.15528	10.573	0.00201349	-1.1136484693915	down	[R]	General function prediction only	--	--	--	Probable ADP-ribosylation factor GTPase-activating protein AGD11 GN=AGD11 OS=Arabidopsis thaliana (Mouse-ear cress) PE=2 SV=1	R	General function prediction only	PREDICTED: probable ADP-ribosylation factor GTPase-activating protein AGD13 [Vitis vinifera]
gene2196	LOC107431162	0.492888	0.728389	1.84664	0.337574	0.343325	0.785818	0.0394419	-1.1148884020752	down	[RTKL]	General function prediction only;; Signal transduction mechanisms;; Transcription;; Replication, recombination and repair	--	--	--	G-type lectin S-receptor-like serine/threonine-protein kinase At4g27290 (Precursor) GN=At4g27290 OS=Arabidopsis thaliana (Mouse-ear cress) PE=3 SV=4	T	Signal transduction mechanisms	Receptor-like serine/threonine-protein kinase SD1-8 [Morus notabilis]
gene17220	LOC107425430	1.6232	7.84483	3.71004	1.00419	1.82002	3.34695	0.0431733	-1.11740439743649	down	[G]	Carbohydrate transport and metabolism	Molecular Function: hydrolase activity, hydrolyzing O-glycosyl compounds (GO:0004553);; Biological Process: carbohydrate metabolic process (GO:0005975);; Molecular Function: protein binding, bridging (GO:0030674);; Molecular Function: actin filament binding (GO:0051015);;	--	--	--	R	General function prediction only	PREDICTED: probable glucan 1,3-beta-glucosidase A [Prunus mume]
gene15728	LOC107423848	4.81247	9.12083	2.30478	2.98496	2.23136	2.33295	0.00993401	-1.11748769459915	down	--	--	Molecular Function: enzyme inhibitor activity (GO:0004857);; Cellular Component: cell wall (GO:0005618);; Molecular Function: pectinesterase activity (GO:0030599);; Biological Process: cell wall modification (GO:0042545);; Biological Process: negative regulation of catalytic activity (GO:0043086);; Molecular Function: aspartyl esterase activity (GO:0045330);; Biological Process: pectin catabolic …	K01051|0|tcc:TCM_037441|Pectin methylesterase 3; K01051 pectinesterase [EC:3.1.1.11] (A)	Pentose and glucuronate interconversions (ko00040);; Starch and sucrose metabolism (ko00500)	Pectinesterase 3 (Precursor) OS=Citrus sinensis (Sweet orange) PE=1 SV=1	G	Carbohydrate transport and metabolism	Pectin methylesterase 3 [Theobroma cacao]
gene20795	LOC107429317	68.549	95.3006	260.7	56.8574	74.2986	67.9928	0.00397669	-1.11898174075914	down	--	--	--	--	--	MLP-like protein 34 GN=MLP34 OS=Arabidopsis thaliana (Mouse-ear cress) PE=2 SV=1	S	Function unknown	MLP-like protein 28 [Theobroma cacao]
gene9055	LOC107416580	1.53452	3.34799	4.90403	2.04975	1.26358	1.19137	0.0189562	-1.12015362125405	down	[QR]	Secondary metabolites biosynthesis, transport and catabolism;; General function prediction only	Biological Process: methylation (GO:0032259);; Molecular Function: protein dimerization activity (GO:0046983);; Molecular Function: (iso)eugenol O-methyltransferase activity (GO:0050630);;	--	--	(R,S)-reticuline 7-O-methyltransferase GN=PSOMT1 OS=Papaver somniferum (Opium poppy) PE=1 SV=1	R	General function prediction only	(RS)-norcoclaurine 6-O-methyltransferase [Morus notabilis]
gene8735	LOC107416184	0.944824	1.85902	1.53663	0.458464	0.693873	0.950458	0.00878908	-1.12165973778041	down	[O]	Posttranslational modification, protein turnover, chaperones	Molecular Function: glutathione transferase activity (GO:0004364);; Biological Process: response to oxidative stress (GO:0006979);;	K00799|1.06487e-110|fve:101294111|glutathione S-transferase F11-like; K00799 glutathione S-transferase [EC:2.5.1.18] (A)	Glutathione metabolism (ko00480)	Glutathione S-transferase F12 GN=MKP11.22 OS=Arabidopsis thaliana (Mouse-ear cress) PE=1 SV=1	O	Posttranslational modification, protein turnover, chaperones	PREDICTED: glutathione S-transferase F11-like [Fragaria vesca subsp. vesca]
gene1042	LOC107418223	4.63384	7.01737	7.14588	1.95433	3.19696	3.51424	0.000628487	-1.12187727568454	down	--	--	Cellular Component: ubiquitin ligase complex (GO:0000151);; Molecular Function: ubiquitin-protein transferase activity (GO:0004842);; Biological Process: protein ubiquitination (GO:0016567);;	--	--	U-box domain-containing protein 11 GN=PUB11 OS=Arabidopsis thaliana (Mouse-ear cress) PE=2 SV=2	S	Function unknown	U-box domain-containing protein 11 [Morus notabilis]
gene3338	LOC107410324	2.94149	1.56941	1.91065	0.910173	1.00126	1.0597	0.00404165	-1.12376382907134	down	--	--	--	--	--	Pentatricopeptide repeat-containing protein At1g34160 GN=PCMP-H68 OS=Arabidopsis thaliana (Mouse-ear cress) PE=2 SV=2	R	General function prediction only	PREDICTED: pentatricopeptide repeat-containing protein At1g34160 [Prunus mume]
gene11926	LOC107419677	11.4292	21.0313	26.4564	9.16746	6.61856	11.08	0.0030774	-1.12387902074113	down	--	--	--	--	--	GEM-like protein 4 GN=At5g08350 OS=Arabidopsis thaliana (Mouse-ear cress) PE=2 SV=1	S	Function unknown	hypothetical protein L484_005402 [Morus notabilis]
gene27932	LOC107404376	2.6035	4.66139	9.62599	1.78355	2.42614	3.59575	0.0225781	-1.12548284422592	down	--	--	Cellular Component: mitochondrial matrix (GO:0005759);;	--	--	Uncharacterized protein At2g39795, mitochondrial (Precursor) GN=At2g39795 OS=Arabidopsis thaliana (Mouse-ear cress) PE=2 SV=1	C	Energy production and conversion	hypothetical protein PRUPE_ppa010810mg [Prunus persica]
gene23672	LOC107432435	19.3271	27.9094	11.9155	8.96984	8.92448	9.45489	0.000404716	-1.12654528158	down	--	--	Molecular Function: adenyl nucleotide binding (GO:0030554);;	--	--	CBS domain-containing protein CBSX5 GN=CBSX5 OS=Arabidopsis thaliana (Mouse-ear cress) PE=2 SV=2	S	Function unknown	Cystathionine beta-synthase family protein isoform 1 [Theobroma cacao]
gene12422	LOC107420274	8.93495	19.2306	17.9326	6.75807	5.35142	9.02006	0.000955228	-1.12940662191167	down	--	--	--	--	--	Patellin-6 GN=PATL6 OS=Arabidopsis thaliana (Mouse-ear cress) PE=2 SV=1	I	Lipid transport and metabolism	PREDICTED: random slug protein 5-like [Pyrus x bretschneideri]
gene10468	LOC107418079	1.624	4.86658	6.15343	1.69477	1.95099	2.1003	0.00571417	-1.13337961117899	down	[RTKL]	General function prediction only;; Signal transduction mechanisms;; Transcription;; Replication, recombination and repair	Biological Process: activation of MAPKK activity (GO:0000186);; Molecular Function: MAP kinase kinase kinase activity (GO:0004709);; Molecular Function: ATP binding (GO:0005524);; Cellular Component: plasma membrane (GO:0005886);;	--	--	Probable LRR receptor-like serine/threonine-protein kinase At1g56130 (Precursor) GN=At1g56130 OS=Arabidopsis thaliana (Mouse-ear cress) PE=2 SV=2	T	Signal transduction mechanisms	PREDICTED: probable LRR receptor-like serine/threonine-protein kinase At1g56130 [Prunus mume]
gene17265	LOC107425473	8.97716	7.7058	18.9048	3.76359	5.22608	7.09856	0.00358764	-1.13450343611906	down	--	--	Molecular Function: transferase activity, transferring glycosyl groups (GO:0016757);;	--	--	Putative UDP-glucose flavonoid 3-O-glucosyltransferase 3 {ECO:0000250|UniProtKB:Q2V6K0} OS=Fragaria ananassa (Strawberry) PE=2 SV=1	S	Function unknown	hypothetical protein PRUPE_ppa025943mg [Prunus persica]
gene26295	LOC107435313	8.50553	14.8152	20.9986	8.19719	3.70152	8.67135	0.00960429	-1.13573511120561	down	--	--	--	--	--	--	S	Function unknown	hypothetical protein VITISV_030073 [Vitis vinifera]
gene3508	LOC107410527	83.1364	172.185	226.237	68.6992	70.4347	81.1485	0.000116855	-1.13705290195764	down	[V]	Defense mechanisms	Molecular Function: ATP binding (GO:0005524);; Biological Process: ATP catabolic process (GO:0006200);; Molecular Function: organic phosphonate transmembrane-transporting ATPase activity (GO:0015416);; Cellular Component: membrane (GO:0016020);;	--	--	Pleiotropic drug resistance protein 2 GN=PDR2 OS=Nicotiana plumbaginifolia (Leadwort-leaved tobacco) PE=2 SV=1	Q	Secondary metabolites biosynthesis, transport and catabolism	PREDICTED: pleiotropic drug resistance protein 2-like [Fragaria vesca subsp. vesca]
gene29854	LOC107406459	0.345837	1.63906	2.3971	0.384114	0.622612	0.689057	0.0487203	-1.13910917672647	down	--	--	Cellular Component: plasma membrane (GO:0005886);;	--	--	--	S	Function unknown	PREDICTED: uncharacterized protein LOC100256307 isoform X1 [Vitis vinifera]
gene2850	LOC107404851	1.24654	2.09191	6.08862	1.05997	1.49393	1.71883	0.0287481	-1.1400514865586	down	[O]	Posttranslational modification, protein turnover, chaperones	--	K09510|3.03226e-169|cmo:103503797|dnaJ homolog subfamily B member 4; K09510 DnaJ homolog subfamily B member 4 (A)	--	DnaJ protein ERDJ3B (Precursor) GN=F26K9.30 OS=Arabidopsis thaliana (Mouse-ear cress) PE=1 SV=1	O	Posttranslational modification, protein turnover, chaperones	PREDICTED: dnaJ homolog subfamily B member 4 [Cucumis melo]
gene750	LOC107414994	273.853	467.87	1030.55	188.559	337.004	259.632	0.00199457	-1.140117487	down	--	--	--	--	--	--	--	--	--
gene19764	LOC107428192	7.97776	11.4542	22.1886	6.32633	6.75177	5.67196	0.000830265	-1.14094787953073	down	--	--	Biological Process: calcium ion transport (GO:0006816);; Molecular Function: calcium:proton antiporter activity (GO:0015369);; Cellular Component: integral component of membrane (GO:0016021);; Biological Process: transmembrane transport (GO:0055085);;	K07300|0|pxb:103926837|vacuolar cation/proton exchanger 2-like; K07300 Ca2+:H+ antiporter (A)	--	Vacuolar cation/proton exchanger 2 GN=CAX2 OS=Oryza sativa subsp. japonica (Rice) PE=2 SV=2	P	Inorganic ion transport and metabolism	PREDICTED: vacuolar cation/proton exchanger 2-like [Pyrus x bretschneideri]
gene1369	LOC107421784	22.4716	31.0427	73.1821	22.9232	15.2041	17.63	0.00235793	-1.14229739178208	down	[R]	General function prediction only	Cellular Component: plasma membrane (GO:0005886);; Cellular Component: plasmodesma (GO:0009506);; Molecular Function: FMN binding (GO:0010181);; Molecular Function: oxidoreductase activity (GO:0016491);; Biological Process: negative regulation of transcription, DNA-templated (GO:0045892);; Biological Process: oxidation-reduction process (GO:0055114);;	K03809|4.05685e-125|rcu:RCOM_0066700|Minor allergen Alt a, putative; K03809 Trp repressor binding protein (A)	--	Probable NAD(P)H dehydrogenase (quinone) FQR1-like 1 {ECO:0000305} OS=Arabidopsis thaliana (Mouse-ear cress) PE=2 SV=1	R	General function prediction only	Minor allergen Alt a, putative [Ricinus communis]
gene30640	LOC107407304	5.26806	11.5526	15.9417	4.60313	3.26095	7.07873	0.00604247	-1.1461416074755	down	--	--	Molecular Function: sequence-specific DNA binding transcription factor activity (GO:0003700);; Cellular Component: nucleus (GO:0005634);; Biological Process: regulation of transcription, DNA-templated (GO:0006355);; Biological Process: detection of biotic stimulus (GO:0009595);; Biological Process: response to external stimulus (GO:0009605);; Biological Process: response to wounding (GO:0009611);…	--	--	Probable WRKY transcription factor 40 GN=WRKY40 OS=Arabidopsis thaliana (Mouse-ear cress) PE=1 SV=1	K	Transcription	putative WRKY transcription factor 40 [Morus notabilis]
gene19292	LOC107427682	1072.18	612.007	2589.81	658.956	655.043	595.276	0.0021581	-1.14982136793205	down	[R]	General function prediction only	Molecular Function: iron ion binding (GO:0005506);; Molecular Function: oxidoreductase activity, acting on paired donors, with incorporation or reduction of molecular oxygen, 2-oxoglutarate as one donor, and incorporation of one atom each of oxygen into both donors (GO:0016706);; Biological Process: oxidation-reduction process (GO:0055114);;	--	--	Gibberellin 20 oxidase 1 GN=At4g25420 OS=Arabidopsis thaliana (Mouse-ear cress) PE=2 SV=2	Q	Secondary metabolites biosynthesis, transport and catabolism	hypothetical protein PRUPE_ppa007775mg [Prunus persica]
gene3393	LOC107410358	4.70174	6.71283	12.3217	2.68921	3.97428	4.07601	0.000687866	-1.15032851898126	down	[F]	Nucleotide transport and metabolism	--	K09842|0|pper:PRUPE_ppa000263mg|hypothetical protein; K09842 abscisic-aldehyde oxidase [EC:1.2.3.14] (A)	Carotenoid biosynthesis (ko00906)	Indole-3-acetaldehyde oxidase GN=F22J12.40 OS=Arabidopsis thaliana (Mouse-ear cress) PE=1 SV=2	F	Nucleotide transport and metabolism	hypothetical protein PRUPE_ppa000263mg [Prunus persica]
gene17128	LOC107425355	7.31337	14.4878	10.9397	2.51129	5.32984	7.01195	0.0018506	-1.15192134343043	down	[G]	Carbohydrate transport and metabolism	Molecular Function: beta-galactosidase activity (GO:0004565);; Biological Process: carbohydrate metabolic process (GO:0005975);; Molecular Function: carbohydrate binding (GO:0030246);;	--	--	Beta-galactosidase 10 (Precursor) GN=BGAL10 OS=Arabidopsis thaliana (Mouse-ear cress) PE=2 SV=1	G	Carbohydrate transport and metabolism	PREDICTED: beta-galactosidase 10 [Prunus mume]
gene20108	LOC107428576	1.85403	3.42233	6.79405	1.47669	1.57436	2.08049	0.00561079	-1.15253129532389	down	[RTKL]	General function prediction only;; Signal transduction mechanisms;; Transcription;; Replication, recombination and repair	--	--	--	Cysteine-rich receptor-like protein kinase 2 (Precursor) GN=CRK2 OS=Arabidopsis thaliana (Mouse-ear cress) PE=2 SV=1	T	Signal transduction mechanisms	PREDICTED: cysteine-rich receptor-like protein kinase 2 [Prunus mume]
gene9253	LOC107416745	1.32127	1.39896	2.53802	0.579181	0.592961	1.18401	0.0161627	-1.15318298890179	down	--	--	--	--	--	Protein TIC 20-IV, chloroplastic (Precursor) GN=TIC20-IV OS=Arabidopsis thaliana (Mouse-ear cress) PE=2 SV=1	U	Intracellular trafficking, secretion, and vesicular transport	PREDICTED: protein TIC 20-IV, chloroplastic-like [Malus domestica]
gene5072	LOC107412162	3.12794	3.40912	9.09099	1.89162	2.53337	2.53717	0.0129685	-1.15629358585946	down	--	--	Cellular Component: nucleus (GO:0005634);; Biological Process: regulation of transcription, DNA-templated (GO:0006355);; Biological Process: regulation of translation (GO:0006417);; Cellular Component: plastid (GO:0009536);; Biological Process: auxin-activated signaling pathway (GO:0009734);; Molecular Function: protein dimerization activity (GO:0046983);;	K14484|1.26539e-99|tcc:TCM_026344|AUX/IAA transcriptional regulator family protein isoform 1; K14484 auxin-responsive protein IAA (A)	Plant hormone signal transduction (ko04075)	Auxin-induced protein 22D GN=AUX22D OS=Vigna radiata var. radiata (Mung bean) PE=2 SV=1	K	Transcription	AUX/IAA transcriptional regulator family protein isoform 1 [Theobroma cacao]
gene21181	LOC107429742	0.331989	1.01255	0.777382	0.304315	0.260495	0.400713	0.0111174	-1.15755877078256	down	[S]	Function unknown	--	--	--	TMV resistance protein N GN=N OS=Nicotiana glutinosa (Tobacco) PE=1 SV=1	T	Signal transduction mechanisms	TMV resistance protein N [Morus notabilis]
gene19207	LOC107427561	1.30904	1.11343	2.17386	0.425867	0.900554	0.754004	0.0102763	-1.15992421185057	down	--	--	Molecular Function: sucrose alpha-glucosidase activity (GO:0004575);; Cellular Component: cytosol (GO:0005829);; Biological Process: metabolic process (GO:0008152);; Molecular Function: glycopeptide alpha-N-acetylgalactosaminidase activity (GO:0033926);;	--	--	Probable alkaline/neutral invertase B {ECO:0000305} OS=Arabidopsis thaliana (Mouse-ear cress) PE=1 SV=1	S	Function unknown	neutral invertase 1 (chloroplast) [Camellia sinensis]
gene11412	LOC107419108	49.2894	47.3666	85.3308	31.3921	28.3956	20.8509	5.60949e-05	-1.16165845258578	down	--	--	Biological Process: catabolic process (GO:0009056);; Molecular Function: hydrolase activity, acting on glycosyl bonds (GO:0016798);; Biological Process: macromolecule metabolic process (GO:0043170);;	K01183|3.77824e-100|pmum:103322384|chitinase 5-like; K01183 chitinase [EC:3.2.1.14] (A)	Amino sugar and nucleotide sugar metabolism (ko00520)	Chitinase 4 (Precursor) OS=Oryza sativa subsp. japonica (Rice) PE=2 SV=2	G	Carbohydrate transport and metabolism	PREDICTED: chitinase 5-like [Prunus mume]
gene6427	LOC107413646	6.27254	13.334	13.8835	6.84819	5.05399	3.13874	0.00801662	-1.16475837978529	down	--	--	--	--	--	--	S	Function unknown	PREDICTED: uncharacterized protein LOC101301053 [Fragaria vesca subsp. vesca]
gene6633	LOC107413873	3.97784	5.11643	6.77094	2.42324	2.06635	2.5848	0.00165846	-1.16992311662184	down	[T]	Signal transduction mechanisms	--	K17506|2.36115e-126|pxb:103936926|probable protein phosphatase 2C 25; K17506 protein phosphatase 1L [EC:3.1.3.16] (A)	--	Probable protein phosphatase 2C 30 GN=PP2C5 OS=Arabidopsis thaliana (Mouse-ear cress) PE=2 SV=1	T	Signal transduction mechanisms	putative protein phosphatase 2C 2 [Morus notabilis]
gene21778	LOC107430378	61.233	188.307	315.679	82.5621	57.0289	113.705	0.0066951	-1.17314298194562	down	--	--	Molecular Function: DNA binding (GO:0003677);; Molecular Function: sequence-specific DNA binding transcription factor activity (GO:0003700);; Cellular Component: nucleus (GO:0005634);; Biological Process: regulation of transcription, DNA-templated (GO:0006355);;	K09286|2.54299e-82|csv:101227287|ethylene-responsive transcription factor 1A-like; K09286 EREBP-like factor (A)	--	Ethylene-responsive transcription factor 1A OS=Arabidopsis thaliana (Mouse-ear cress) PE=1 SV=2	K	Transcription	Ethylene-responsive transcription factor 2 [Morus notabilis]
gene18525	LOC107426895	6.08093	10.3552	13.8865	4.14944	2.59533	6.29181	0.0135593	-1.17584579372372	down	--	--	--	--	--	Organ-specific protein P4 OS=Pisum sativum (Garden pea) PE=2 SV=1	R	General function prediction only	hypothetical protein L484_026929 [Morus notabilis]
gene9919	LOC107417448	36.2066	64.5199	57.8828	29.9203	16.7168	23.106	3.2477e-05	-1.18813714466794	down	[R]	General function prediction only	--	--	--	Probable 2-oxoglutarate-dependent dioxygenase AOP1.2 GN=AOP1.2 OS=Arabidopsis thaliana (Mouse-ear cress) PE=2 SV=1	Q	Secondary metabolites biosynthesis, transport and catabolism	PREDICTED: probable inactive 2-oxoglutarate-dependent dioxygenase AOP2 [Malus domestica]
gene4143	LOC107411214	4.25541	5.12092	5.56274	1.6862	2.02298	2.8184	0.00101156	-1.19260315515828	down	[I]	Lipid transport and metabolism	Molecular Function: carboxylic ester hydrolase activity (GO:0052689);;	--	--	Probable carboxylesterase 13 GN=CXE13 OS=Arabidopsis thaliana (Mouse-ear cress) PE=1 SV=1	V	Defense mechanisms	catalytic, putative [Ricinus communis]
gene4382	LOC107411416	41.6416	47.3497	20.7493	9.91426	14.6593	23.4391	0.000738012	-1.19287498527977	down	--	--	Biological Process: response to fungus (GO:0009620);;	--	--	Protein PMR5 GN=MZN1.6 OS=Arabidopsis thaliana (Mouse-ear cress) PE=2 SV=1	S	Function unknown	hypothetical protein L484_007599 [Morus notabilis]
gene17841	LOC107426135	4.37227	6.59355	11.2546	2.24529	4.47368	4.89782	0.00547729	-1.19311944467313	down	--	--	Cellular Component: endosome (GO:0005768);; Cellular Component: Golgi apparatus (GO:0005794);; Cellular Component: trans-Golgi network (GO:0005802);; Molecular Function: heme binding (GO:0020037);;	--	--	--	R	General function prediction only	PREDICTED: uncharacterized protein LOC103331666 [Prunus mume]
gene6826	LOC107414092	84.9705	110.528	9.25195	42.0162	20.3998	27.022	0.0414048	-1.19376704671828	down	--	--	--	--	--	--	R	General function prediction only	PREDICTED: uncharacterized protein LOC101312772 [Fragaria vesca subsp. vesca]
gene7624	LOC107414953	2.4634	3.64111	3.58188	1.87342	1.0917	1.34505	0.00641898	-1.19544310020166	down	--	--	--	--	--	--	S	Function unknown	Uncharacterized protein TCM_015546 [Theobroma cacao]
gene21183	LOC107429717	0.865019	2.05724	1.53332	0.795687	0.431937	0.725001	0.0124636	-1.19606089788698	down	--	--	--	--	--	--	S	Function unknown	PREDICTED: uncharacterized protein LOC103961431 [Pyrus x bretschneideri]
gene23943	LOC107432743	3.17993	3.65952	2.35653	1.95378	0.998157	1.29048	0.0109116	-1.2010974366516	down	[Q]	Secondary metabolites biosynthesis, transport and catabolism	Molecular Function: monooxygenase activity (GO:0004497);; Molecular Function: iron ion binding (GO:0005506);; Molecular Function: electron carrier activity (GO:0009055);; Molecular Function: oxidoreductase activity, acting on paired donors, with incorporation or reduction of molecular oxygen (GO:0016705);; Molecular Function: heme binding (GO:0020037);; Biological Process: oxidation-reduction pro…	--	--	Cytochrome P450 CYP72A219 OS=Panax ginseng (Korean ginseng) PE=2 SV=1	Q	Secondary metabolites biosynthesis, transport and catabolism	Secologanin synthase [Morus notabilis]
gene22186	LOC107430839	8.52321	17.1539	30.4091	8.09829	6.5082	9.59333	0.00404689	-1.20134683389997	down	[P]	Inorganic ion transport and metabolism	--	K07300|7.18981e-40|gmx:100779440|vacuolar cation/proton exchanger 3-like; K07300 Ca2+:H+ antiporter (A)	--	Vacuolar cation/proton exchanger 3 GN=CAX3 OS=Arabidopsis thaliana (Mouse-ear cress) PE=1 SV=1	P	Inorganic ion transport and metabolism	PREDICTED: vacuolar cation/proton exchanger 3-like [Glycine max]
gene16460	LOC107424630	24.2486	40.572	116.838	36.61	21.5074	19.8256	0.00679596	-1.21020242326478	down	--	--	Molecular Function: iron ion binding (GO:0005506);; Cellular Component: cytoplasm (GO:0005737);; Biological Process: inositol catabolic process (GO:0019310);; Molecular Function: inositol oxygenase activity (GO:0050113);; Biological Process: oxidation-reduction process (GO:0055114);;	K00469|0|cit:102618274|inositol oxygenase 1-like; K00469 inositol oxygenase [EC:1.13.99.1] (A)	Ascorbate and aldarate metabolism (ko00053);; Inositol phosphate metabolism (ko00562)	Inositol oxygenase 1 OS=Arabidopsis thaliana (Mouse-ear cress) PE=2 SV=1	R	General function prediction only	Inositol oxygenase 1 [Morus notabilis]
gene14606	LOC107422619	3.34136	9.48754	4.29706	2.40936	1.76224	3.17538	0.00197376	-1.21129145223008	down	[I]	Lipid transport and metabolism	Biological Process: pentacyclic triterpenoid biosynthetic process (GO:0019745);; Molecular Function: lupeol synthase activity (GO:0042299);; Biological Process: cuticle development (GO:0042335);;	K15813|0|fve:101305573|beta-amyrin synthase-like; K15813 beta-amyrin synthase [EC:5.4.99.39] (A)	Sesquiterpenoid and triterpenoid biosynthesis (ko00909)	Lupeol synthase OS=Ricinus communis (Castor bean) PE=1 SV=1	I	Lipid transport and metabolism	hypothetical protein L484_012176 [Morus notabilis]
gene24110	LOC107432928	4.71944	8.98201	17.7935	4.10513	4.35328	5.03087	0.00240002	-1.21251557027759	down	[E]	Amino acid transport and metabolism	Biological Process: ethylene biosynthetic process (GO:0009693);; Biological Process: response to abscisic acid (GO:0009737);; Biological Process: response to chitin (GO:0010200);; Molecular Function: transferase activity (GO:0016740);; Molecular Function: 1-aminocyclopropane-1-carboxylate synthase activity (GO:0016847);; Molecular Function: pyridoxal phosphate binding (GO:0030170);; Biological Pr…	K01762|3.37517e-178|cic:CICLE_v10019970mg|hypothetical protein; K01762 1-aminocyclopropane-1-carboxylate synthase [EC:4.4.1.14] (A)	Cysteine and methionine metabolism (ko00270)	1-aminocyclopropane-1-carboxylate synthase 1 GN=ACS1 OS=Prunus mume (Japanese apricot) PE=2 SV=1	E	Amino acid transport and metabolism	hypothetical protein CICLE_v10019970mg [Citrus clementina]
gene8144	LOC107415554	71.9546	203.188	164.163	87.7736	60.6343	41.2239	0.000603356	-1.21474249777507	down	--	--	--	--	--	Gibberellin-regulated protein 4 (Precursor) GN=GASA4 OS=Arabidopsis thaliana (Mouse-ear cress) PE=1 SV=2	R	General function prediction only	PREDICTED: gibberellin-regulated protein 4 [Populus euphratica]
jujube_newGene_2231	--	1.39288	4.62557	5.40481	1.05097	2.09717	1.96398	0.0211805	-1.21669189525602	down	[J]	Translation, ribosomal structure and biogenesis	Molecular Function: catalytic activity (GO:0003824);; Biological Process: metabolic process (GO:0008152);;	K02896|1.55286e-68|sot:102582594|probable ribosome biogenesis protein RLP24-like; K02896 large subunit ribosomal protein L24e (A)	Ribosome (ko03010)	Probable ribosome biogenesis protein RLP24 GN=At2g44860 OS=Arabidopsis thaliana (Mouse-ear cress) PE=2 SV=1	J	Translation, ribosomal structure and biogenesis	PREDICTED: probable ribosome biogenesis protein RLP24 [Nicotiana sylvestris]
gene32056	LOC107408840	6.04369	19.1656	6.40407	3.69821	5.45804	4.31508	0.00927404	-1.21717486112308	down	--	--	Biological Process: acetyl-CoA metabolic process (GO:0006084);; Biological Process: plant-type cell wall organization (GO:0009664);; Biological Process: plant-type cell wall biogenesis (GO:0009832);; Biological Process: regulation of meristem growth (GO:0010075);; Biological Process: sterol biosynthetic process (GO:0016126);; Biological Process: brassinosteroid biosynthetic process (GO:0016132);;…	--	--	Fasciclin-like arabinogalactan protein 7 (Precursor) GN=FLA7 OS=Arabidopsis thaliana (Mouse-ear cress) PE=1 SV=1	R	General function prediction only	Fasciclin-like arabinogalactan protein 7 isoform 1 [Theobroma cacao]
gene27336	LOC107403720	1.3193	4.20873	1.24495	0.647876	0.631175	1.65834	0.0278102	-1.21929482608008	down	[Q]	Secondary metabolites biosynthesis, transport and catabolism	Biological Process: polysaccharide biosynthetic process (GO:0000271);; Molecular Function: copper ion binding (GO:0005507);; Cellular Component: vacuolar membrane (GO:0005774);; Molecular Function: L-ascorbate oxidase activity (GO:0008447);; Cellular Component: plant-type cell wall (GO:0009505);; Cellular Component: plasmodesma (GO:0009506);; Biological Process: multidimensional cell growth (GO:0…	--	--	Monocopper oxidase-like protein SKU5 (Precursor) GN=SKU5 OS=Arabidopsis thaliana (Mouse-ear cress) PE=1 SV=1	Q	Secondary metabolites biosynthesis, transport and catabolism	Monocopper oxidase-like protein SKU5 [Morus notabilis]
gene31438	LOC107408165	7.73958	23.0396	61.0781	12.6396	12.158	13.6115	0.0219071	-1.21996369920984	down	--	--	--	--	--	--	--	--	hypothetical protein PRUPE_ppa012817mg [Prunus persica]
gene520	LOC107412223	82.8548	127.611	162.39	47.3933	38.7303	71.233	0.000320804	-1.22303859000128	down	--	--	--	--	--	--	S	Function unknown	hypothetical protein PRUPE_ppa026968mg [Prunus persica]
gene12050	LOC107419854	1.5006	4.86255	5.70977	1.57608	1.63541	2.00204	0.00803552	-1.22393890100379	down	[RTKL]	General function prediction only;; Signal transduction mechanisms;; Transcription;; Replication, recombination and repair	Biological Process: activation of MAPKK activity (GO:0000186);; Molecular Function: MAP kinase kinase kinase activity (GO:0004709);; Molecular Function: ATP binding (GO:0005524);;	--	--	Probable serine/threonine-protein kinase Cx32, chloroplastic (Precursor) GN=At4g35600 OS=Arabidopsis thaliana (Mouse-ear cress) PE=1 SV=2	T	Signal transduction mechanisms	putative serine/threonine-protein kinase Cx32 [Morus notabilis]
gene21040	LOC107429554	1.89617	3.49468	7.43623	2.09831	1.64196	1.73314	0.00288063	-1.22496885687928	down	[P]	Inorganic ion transport and metabolism	--	K01530|0|tcc:TCM_011901|ATPase E1-E2 type family protein / haloacid dehalogenase-like hydrolase family protein; K01530 phospholipid-translocating ATPase [EC:3.6.3.1] (A)	--	Putative phospholipid-transporting ATPase 9 GN=ALA9 OS=Arabidopsis thaliana (Mouse-ear cress) PE=3 SV=1	P	Inorganic ion transport and metabolism	ATPase E1-E2 type family protein / haloacid dehalogenase-like hydrolase family protein [Theobroma cacao]
gene11339	LOC107419027	24.6882	39.2078	23.3357	6.06166	13.8621	17.181	0.000518713	-1.23206358549836	down	--	--	Biological Process: polysaccharide biosynthetic process (GO:0000271);; Biological Process: polysaccharide catabolic process (GO:0000272);; Biological Process: starch metabolic process (GO:0005982);; Biological Process: glycolytic process (GO:0006096);; Biological Process: calcium ion transport (GO:0006816);; Biological Process: water transport (GO:0006833);; Biological Process: hyperosmotic respo…	--	--	Protein COBRA (Precursor) GN=COB OS=Arabidopsis thaliana (Mouse-ear cress) PE=2 SV=1	R	General function prediction only	COBRA-like extracellular glycosyl-phosphatidyl inositol-anchored protein family isoform 2 [Theobroma cacao]
gene4733	LOC107411788	1.6056	5.34464	3.96194	1.77881	0.983205	1.91086	0.0107662	-1.23232148031449	down	--	--	--	--	--	--	S	Function unknown	hypothetical protein PRUPE_ppa003269mg [Prunus persica]
gene23805	LOC107432589	18.5837	21.0579	42.826	8.92272	17.3423	20.2153	0.00360209	-1.23447623924762	down	[RTKL]	General function prediction only;; Signal transduction mechanisms;; Transcription;; Replication, recombination and repair	Molecular Function: transferase activity, transferring phosphorus-containing groups (GO:0016772);;	--	--	Probable LRR receptor-like serine/threonine-protein kinase At1g53430 (Precursor) GN=At1g53430 OS=Arabidopsis thaliana (Mouse-ear cress) PE=1 SV=1	T	Signal transduction mechanisms	hypothetical protein PRUPE_ppa000854mg [Prunus persica]
gene16161	LOC107424359	42.2817	60.0669	108.916	20.593	28.4445	40.433	0.000222829	-1.23533104356469	down	[HE]	Coenzyme transport and metabolism;; Amino acid transport and metabolism	Molecular Function: O-phospho-L-serine:2-oxoglutarate aminotransferase activity (GO:0004648);; Biological Process: L-serine biosynthetic process (GO:0006564);; Molecular Function: pyridoxal phosphate binding (GO:0030170);;	K00831|0|pper:PRUPE_ppa006013mg|hypothetical protein; K00831 phosphoserine aminotransferase [EC:2.6.1.52] (A)	Glycine, serine and threonine metabolism (ko00260);; Vitamin B6 metabolism (ko00750);; Carbon metabolism (ko01200);; Biosynthesis of amino acids (ko01230)	Phosphoserine aminotransferase 1, chloroplastic (Precursor) GN=PSAT1 OS=Arabidopsis thaliana (Mouse-ear cress) PE=1 SV=1	E	Amino acid transport and metabolism	hypothetical protein PRUPE_ppa006013mg [Prunus persica]
gene18331	LOC107426738	2.20281	2.95917	2.9514	0.949197	1.4444	1.10836	0.00609238	-1.2381514278308	down	--	--	--	--	--	Cytochrome b561 and DOMON domain-containing protein At3g25290 (Precursor) GN=At3g25290 OS=Arabidopsis thaliana (Mouse-ear cress) PE=2 SV=1	T	Signal transduction mechanisms	hypothetical protein L484_015832 [Morus notabilis]
gene27569	LOC107403983	53.4032	39.5158	161.757	43.2081	31.858	34.575	0.00177633	-1.23933488359926	down	--	--	Biological Process: response to light stimulus (GO:0009416);; Cellular Component: plastid (GO:0009536);; Biological Process: response to auxin (GO:0009733);; Molecular Function: indole-3-acetic acid amido synthetase activity (GO:0010279);; Cellular Component: cytoplasmic membrane-bounded vesicle (GO:0016023);; Biological Process: secretion by cell (GO:0032940);;	K14487|0|tcc:TCM_007172|Auxin-responsive GH3 family protein; K14487 auxin responsive GH3 gene family (A)	Plant hormone signal transduction (ko04075)	Probable indole-3-acetic acid-amido synthetase GH3.1 GN=GH3.1 OS=Arabidopsis thaliana (Mouse-ear cress) PE=2 SV=1	R	General function prediction only	Auxin-responsive GH3 family protein [Theobroma cacao]
gene29407	LOC107405986	0.181338	0.196096	0.351868	0.0770549	0.0842683	0.15303	0.00833074	-1.24309851040735	down	--	--	--	--	--	--	S	Function unknown	PREDICTED: uncharacterized protein LOC103336297 [Prunus mume]
gene32663	LOC107409499	0.740601	3.15829	2.92259	0.402628	1.61121	0.921536	0.0437256	-1.24967778131371	down	--	--	--	--	--	Uncharacterized protein At1g08160 GN=At1g08160 OS=Arabidopsis thaliana (Mouse-ear cress) PE=2 SV=1	S	Function unknown	hypothetical protein PRUPE_ppa010048mg [Prunus persica]
gene12205	LOC107419955	9.95086	15.6599	50.732	6.92848	10.9974	14.1302	0.0100435	-1.25200198968939	down	--	--	Cellular Component: plasma membrane (GO:0005886);;	--	--	--	S	Function unknown	PREDICTED: uncharacterized protein LOC100254049 [Vitis vinifera]
gene22097	LOC107430751	1.16331	3.04161	4.35834	1.33887	1.20706	1.12952	0.011805	-1.25251735536145	down	--	--	--	--	--	Reticulon-like protein B12 GN=RTNLB12 OS=Arabidopsis thaliana (Mouse-ear cress) PE=2 SV=1	U	Intracellular trafficking, secretion, and vesicular transport	PREDICTED: reticulon-like protein B12-like [Citrus sinensis]
gene25683	LOC107434670	24.5372	41.4122	34.4557	13.1557	13.7145	15.3587	2.41206e-07	-1.25355401299547	down	[O]	Posttranslational modification, protein turnover, chaperones	Molecular Function: serine-type endopeptidase activity (GO:0004252);; Biological Process: proteolysis (GO:0006508);; Cellular Component: plant-type cell wall (GO:0009505);; Molecular Function: identical protein binding (GO:0042802);; Biological Process: negative regulation of catalytic activity (GO:0043086);; Cellular Component: apoplast (GO:0048046);; Biological Process: mucilage metabolic proce…	--	--	Subtilisin-like protease (Precursor) GN=At5g67360 OS=Arabidopsis thaliana (Mouse-ear cress) PE=1 SV=1	O	Posttranslational modification, protein turnover, chaperones	Subtilase family protein [Theobroma cacao]
gene7345	LOC107414667	16.3831	25.0908	48.17	8.09453	15.2537	14.3513	0.00033343	-1.25414125759799	down	[O]	Posttranslational modification, protein turnover, chaperones	Molecular Function: ATP binding (GO:0005524);; Molecular Function: microtubule-severing ATPase activity (GO:0008568);;	--	--	Katanin p60 ATPase-containing subunit A1 {ECO:0000255|HAMAP-Rule:MF_03023} GN=At1g80350 OS=Arabidopsis thaliana (Mouse-ear cress) PE=1 SV=1	O	Posttranslational modification, protein turnover, chaperones	P-loop containing nucleoside triphosphate hydrolases superfamily protein [Theobroma cacao]
gene2232	LOC107431716	14.5835	22.4079	50.7662	9.40143	12.4776	14.7953	0.000781327	-1.25485551685258	down	--	--	--	--	--	Chitin-inducible gibberellin-responsive protein 1 GN=P0006G05.102 OS=Oryza sativa subsp. japonica (Rice) PE=2 SV=1	K	Transcription	hypothetical protein PRUPE_ppa003323mg [Prunus persica]
gene23295	LOC107432042	31.7503	39.289	68.7335	16.0737	22.7856	19.7035	6.21715e-06	-1.25522314989184	down	[E]	Amino acid transport and metabolism	Molecular Function: L-threonine ammonia-lyase activity (GO:0004794);; Biological Process: gluconeogenesis (GO:0006094);; Biological Process: threonine metabolic process (GO:0006566);; Biological Process: cytoskeleton organization (GO:0007010);; Biological Process: isoleucine biosynthetic process (GO:0009097);; Biological Process: proteasomal protein catabolic process (GO:0010498);; Molecular Func…	K01754|0|pop:POPTR_0006s11980g|hypothetical protein; K01754 threonine dehydratase [EC:4.3.1.19] (A)	Glycine, serine and threonine metabolism (ko00260);; Valine, leucine and isoleucine biosynthesis (ko00290);; Carbon metabolism (ko01200);; Biosynthesis of amino acids (ko01230)	Threonine dehydratase biosynthetic, chloroplastic (Precursor) GN=OMR1 OS=Arabidopsis thaliana (Mouse-ear cress) PE=1 SV=1	E	Amino acid transport and metabolism	hypothetical protein JCGZ_16612 [Jatropha curcas]
gene6487	LOC107413720	5.66107	8.98218	18.1024	3.89121	4.28858	5.40293	0.000974128	-1.26019536799725	down	[RTKL]	General function prediction only;; Signal transduction mechanisms;; Transcription;; Replication, recombination and repair	Molecular Function: non-membrane spanning protein tyrosine kinase activity (GO:0004715);; Molecular Function: ATP binding (GO:0005524);; Biological Process: protein phosphorylation (GO:0006468);;	--	--	Probable receptor-like protein kinase At5g15080 GN=At5g15080 OS=Arabidopsis thaliana (Mouse-ear cress) PE=2 SV=1	T	Signal transduction mechanisms	Receptor-like protein kinase [Theobroma cacao]
gene4451	LOC107411506	1.96626	1.65906	6.44425	1.12947	1.35661	1.7265	0.0187651	-1.26178244578197	down	--	--	Molecular Function: metal ion binding (GO:0046872);;	--	--	RING-H2 finger protein ATL2 GN=ATL2 OS=Arabidopsis thaliana (Mouse-ear cress) PE=2 SV=2	O	Posttranslational modification, protein turnover, chaperones	PREDICTED: RING-H2 finger protein ATL63 [Vitis vinifera]
gene17812	LOC107426039	1.69193	3.60763	11.0669	2.02335	1.54937	3.20784	0.0348018	-1.26811431898809	down	--	--	Cellular Component: nucleosome (GO:0000786);; Molecular Function: DNA binding (GO:0003677);; Cellular Component: nucleus (GO:0005634);; Biological Process: nucleosome assembly (GO:0006334);; Molecular Function: protein heterodimerization activity (GO:0046982);;	K11251|1.45994e-66|gmx:100818215|probable histone H2AXa-like; K11251 histone H2A (A)	--	Histone H2AX GN=HIS2A OS=Cicer arietinum (Chickpea) PE=2 SV=1	B	Chromatin structure and dynamics	PREDICTED: probable histone H2AXa-like [Glycine max]
gene9716	LOC107417252	1.78023	4.40993	3.84992	0.625653	0.845044	2.26346	0.00852176	-1.26917063338827	down	--	--	Molecular Function: transferase activity (GO:0016740);;	--	--	Putative UDP-glucose flavonoid 3-O-glucosyltransferase 3 {ECO:0000250|UniProtKB:Q2V6K0} OS=Fragaria ananassa (Strawberry) PE=2 SV=1	CG	Energy production and conversion;; Carbohydrate transport and metabolism	PREDICTED: putative UDP-glucose flavonoid 3-O-glucosyltransferase 3 [Prunus mume]
gene13799	LOC107421730	7.00853	22.0738	42.944	10.674	8.56639	10.5443	0.00636508	-1.27531414087564	down	--	--	Molecular Function: peroxidase activity (GO:0004601);; Cellular Component: vacuole (GO:0005773);; Biological Process: response to oxidative stress (GO:0006979);; Cellular Component: plant-type cell wall (GO:0009505);; Cellular Component: membrane (GO:0016020);; Molecular Function: heme binding (GO:0020037);; Molecular Function: metal ion binding (GO:0046872);; Biological Process: oxidation-reduct…	K00430|0|pmum:103336232|peroxidase 12; K00430 peroxidase [EC:1.11.1.7] (A)	Phenylalanine metabolism (ko00360);; Phenylpropanoid biosynthesis (ko00940)	Peroxidase 12 (Precursor) OS=Arabidopsis thaliana (Mouse-ear cress) PE=1 SV=1	G	Carbohydrate transport and metabolism	PREDICTED: peroxidase 12 [Prunus mume]
gene18223	LOC107426771	2.23173	2.75552	4.00728	1.03061	1.52682	1.18316	0.00114705	-1.27656904150015	down	[H]	Coenzyme transport and metabolism	Molecular Function: pantoate-beta-alanine ligase activity (GO:0004592);; Biological Process: pantothenate biosynthetic process (GO:0015940);;	K01918|0|fve:101298957|pantoate--beta-alanine ligase-like; K01918 pantoate--beta-alanine ligase [EC:6.3.2.1] (A)	beta-Alanine metabolism (ko00410);; Pantothenate and CoA biosynthesis (ko00770)	Pantoate--beta-alanine ligase (Precursor) GN=PANC OS=Lotus japonicus (Lotus corniculatus var. japonicus) PE=1 SV=3	H	Coenzyme transport and metabolism	Pantoate--beta-alanine ligase [Morus notabilis]
gene5300	LOC107412429	4.06881	9.20139	13.7356	3.09853	4.12034	4.045	0.000587686	-1.27679779975268	down	--	--	--	--	--	--	S	Function unknown	hypothetical protein L484_015104 [Morus notabilis]
gene18371	LOC107426717	3.84241	13.5493	2.1155	1.74111	2.08715	3.00516	0.0112139	-1.27832896035011	down	--	--	Biological Process: oligopeptide transport (GO:0006857);; Molecular Function: oligopeptide transporter activity (GO:0015198);; Cellular Component: membrane (GO:0016020);; Biological Process: transmembrane transport (GO:0055085);;	--	--	Oligopeptide transporter 4 GN=OPT4 OS=Arabidopsis thaliana (Mouse-ear cress) PE=1 SV=1	P	Inorganic ion transport and metabolism	PREDICTED: oligopeptide transporter 4-like [Solanum tuberosum]
gene6440	LOC107413671	13.8195	21.7015	67.2396	22.379	15.1211	14.7117	0.00697132	-1.27881682526926	down	--	--	Biological Process: respiratory burst involved in defense response (GO:0002679);; Molecular Function: calmodulin binding (GO:0005516);; Cellular Component: plasma membrane (GO:0005886);; Biological Process: oligopeptide transport (GO:0006857);; Biological Process: cell death (GO:0008219);; Biological Process: toxin catabolic process (GO:0009407);; Biological Process: defense response to fungus, i…	K08472|0|tcc:TCM_043107|Seven transmembrane MLO family protein; K08472 mlo protein (A)	--	MLO-like protein 12 GN=MLO12 OS=Arabidopsis thaliana (Mouse-ear cress) PE=2 SV=2	S	Function unknown	PREDICTED: MLO-like protein 6 [Tarenaya hassleriana]
gene20812	LOC107429310	6.91871	8.50295	9.24263	2.39996	3.56629	4.1262	6.05648e-05	-1.28150877487905	down	[E]	Amino acid transport and metabolism	Molecular Function: serine-type carboxypeptidase activity (GO:0004185);; Cellular Component: vacuole (GO:0005773);; Biological Process: proteolysis (GO:0006508);;	K09645|0|pop:POPTR_0008s12860g|POPTRDRAFT_656911; serine carboxypeptidase S10 family protein; K09645 vitellogenic carboxypeptidase-like protein [EC:3.4.16.-] (A)	--	Serine carboxypeptidase-like 50 (Precursor) GN=SCPL50 OS=Arabidopsis thaliana (Mouse-ear cress) PE=2 SV=1	O	Posttranslational modification, protein turnover, chaperones	serine carboxypeptidase S10 family protein [Populus trichocarpa]
jujube_newGene_2472	--	1.98872	4.1766	10.3522	2.79889	2.34097	1.56319	0.028061	-1.28448002253107	down	--	--	--	--	--	Phytosulfokine-beta (Precursor) GN=PSK2 OS=Arabidopsis thaliana (Mouse-ear cress) PE=2 SV=1	S	Function unknown	Phytosulfokines 3 [Morus notabilis]
gene7998	LOC107415351	0.333129	1.41094	1.1153	0.15869	0.423074	0.612116	0.0362659	-1.2870319213773	down	--	--	--	--	--	Senescence-associated carboxylesterase 101 (Precursor) GN=SAG101 OS=Arabidopsis thaliana (Mouse-ear cress) PE=1 SV=1	S	Function unknown	PREDICTED: senescence-associated carboxylesterase 101-like [Prunus mume]
gene15061	LOC107423108	431.651	884.58	734.999	308.459	79.1679	451.636	0.00424342	-1.28783814704992	down	--	--	Biological Process: response to cold (GO:0009409);; Cellular Component: chloroplast thylakoid membrane (GO:0009535);; Biological Process: anthocyanin-containing compound biosynthetic process (GO:0009718);; Biological Process: response to sucrose (GO:0009744);; Biological Process: positive regulation of seed germination (GO:0010030);; Biological Process: photoprotection (GO:0010117);; Biological P…	--	--	Early light-induced protein 1, chloroplastic (Precursor) GN=ELIP1 OS=Arabidopsis thaliana (Mouse-ear cress) PE=1 SV=1	S	Function unknown	PREDICTED: early light-induced protein, chloroplastic-like [Cucumis sativus]
gene3	LOC107416081	1.46246	1.96355	1.4648	0.909704	0.489704	0.613721	0.0060101	-1.29157207005049	down	--	--	Biological Process: transcription, DNA-templated (GO:0006351);; Biological Process: response to auxin (GO:0009733);; Biological Process: regulation of cellular process (GO:0050794);;	--	--	Auxin-responsive protein IAA33 GN=IAA33 OS=Arabidopsis thaliana (Mouse-ear cress) PE=2 SV=1	K	Transcription	hypothetical protein PRUPE_ppa018956mg [Prunus persica]
gene25365	LOC107434314	3.18707	9.18937	6.6625	2.23076	2.91006	2.50651	0.0026027	-1.29586494548747	down	[M]	Cell wall/membrane/envelope biogenesis	Molecular Function: transferase activity (GO:0016740);;	--	--	Probable long-chain-alcohol O-fatty-acyltransferase 5 GN=AT5 OS=Arabidopsis thaliana (Mouse-ear cress) PE=2 SV=1	S	Function unknown	Annotation was added to scaffolds in November 2011~Long-chain-alcohol O-fatty-acyltransferase [Medicago truncatula]
gene25480	LOC107434445	1.2598	1.63648	1.35877	0.460376	0.473013	0.896834	0.00983159	-1.29589711174842	down	--	--	Molecular Function: nucleotide binding (GO:0000166);; Molecular Function: nucleic acid binding (GO:0003676);;	--	--	--	R	General function prediction only	Protein vip1 [Morus notabilis]
gene15253	LOC107423328	1.202	1.58245	2.49142	0.714089	0.699282	0.718589	0.00042841	-1.29610087170369	down	--	--	Biological Process: response to molecule of bacterial origin (GO:0002237);; Molecular Function: protein serine/threonine kinase activity (GO:0004674);; Molecular Function: protein tyrosine kinase activity (GO:0004713);; Molecular Function: ATP binding (GO:0005524);; Biological Process: protein phosphorylation (GO:0006468);; Biological Process: signal transduction (GO:0007165);; Biological Process…	--	--	Leucine-rich repeat receptor-like serine/threonine-protein kinase At1g17230 (Precursor) GN=At1g17230 OS=Arabidopsis thaliana (Mouse-ear cress) PE=2 SV=2	T	Signal transduction mechanisms	PREDICTED: leucine-rich repeat receptor-like serine/threonine-protein kinase At1g17230 [Prunus mume]
gene22714	LOC107431392	10.465	25.9263	51.8425	12.7545	8.67128	14.3258	0.00286335	-1.29898748037895	down	[TZDR]	Signal transduction mechanisms;; Cytoskeleton;; Cell cycle control, cell division, chromosome partitioning;; General function prediction only	Molecular Function: calcium ion binding (GO:0005509);;	K13448|1.42519e-67|rcu:RCOM_0126810|calcium binding protein/cast, putative; K13448 calcium-binding protein CML (A)	Plant-pathogen interaction (ko04626)	Calcium-binding allergen Bet v 3 GN=BETVIII OS=Betula pendula (European white birch) PE=1 SV=1	T	Signal transduction mechanisms	calcium binding protein/cast, putative [Ricinus communis]
gene21320	LOC107429892	182.989	233.42	596.991	156.841	133.245	129.87	0.000171157	-1.30235174856955	down	[IQ]	Lipid transport and metabolism;; Secondary metabolites biosynthesis, transport and catabolism	Molecular Function: o-succinylbenzoate-CoA ligase activity (GO:0008756);; Cellular Component: plasmodesma (GO:0009506);; Cellular Component: chloroplast stroma (GO:0009570);; Biological Process: positive regulation of seed germination (GO:0010030);; Biological Process: response to nitrate (GO:0010167);; Biological Process: seed coat development (GO:0010214);; Biological Process: nitrate transport…	--	--	Oxalate--CoA ligase {ECO:0000305} OS=Arabidopsis thaliana (Mouse-ear cress) PE=1 SV=1	I	Lipid transport and metabolism	CCL9 [Humulus lupulus]
gene24075	LOC107432882	8.36561	9.39435	15.1878	4.96057	4.49183	3.70958	3.39083e-05	-1.31518064999828	down	[H]	Coenzyme transport and metabolism	Molecular Function: 3-methyl-2-oxobutanoate hydroxymethyltransferase activity (GO:0003864);; Cellular Component: mitochondrion (GO:0005739);; Molecular Function: methyltransferase activity (GO:0008168);; Molecular Function: zinc ion binding (GO:0008270);; Biological Process: pantothenate biosynthetic process (GO:0015940);; Biological Process: methylation (GO:0032259);; Molecular Function: cobalt …	K00606|0|pper:PRUPE_ppa007963mg|hypothetical protein; K00606 3-methyl-2-oxobutanoate hydroxymethyltransferase [EC:2.1.2.11] (A)	Pantothenate and CoA biosynthesis (ko00770)	3-methyl-2-oxobutanoate hydroxymethyltransferase 2, mitochondrial (Precursor) GN=F2A19.130 OS=Arabidopsis thaliana (Mouse-ear cress) PE=1 SV=1	H	Coenzyme transport and metabolism	ketopantoate hydroxymethyltransferase family protein [Populus trichocarpa]
gene20412	LOC107428907	1.34486	2.3123	3.49094	0.992864	0.704458	1.15907	0.00301278	-1.31570586251145	down	--	--	--	--	--	--	S	Function unknown	hypothetical protein L484_015713 [Morus notabilis]
gene19652	LOC107428073	3.84279	7.87001	5.11477	1.56349	2.51796	2.72968	0.000331447	-1.3188414618702	down	--	--	Cellular Component: Golgi apparatus (GO:0005794);; Cellular Component: plant-type cell wall (GO:0009505);;	--	--	Uncharacterized protein At1g04910 GN=At1g04910 OS=Arabidopsis thaliana (Mouse-ear cress) PE=2 SV=1	S	Function unknown	hypothetical protein L484_004969 [Morus notabilis]
gene13069	LOC107420886	5.81491	15.5249	23.9485	4.46518	6.54119	7.27138	0.00218887	-1.32300297416869	down	[I]	Lipid transport and metabolism	Biological Process: metabolic process (GO:0008152);; Molecular Function: carboxylic ester hydrolase activity (GO:0052689);;	--	--	Probable carboxylesterase 2 GN=CXE2 OS=Arabidopsis thaliana (Mouse-ear cress) PE=2 SV=1	V	Defense mechanisms	PREDICTED: probable carboxylesterase 2 [Pyrus x bretschneideri]
gene7996	LOC107415435	34.5733	84.7013	45.1715	5.75257	23.6162	36.0508	0.00869533	-1.32499063908622	down	--	--	Molecular Function: peroxidase activity (GO:0004601);; Biological Process: response to oxidative stress (GO:0006979);; Cellular Component: plant-type cell wall (GO:0009505);; Molecular Function: heme binding (GO:0020037);; Molecular Function: metal ion binding (GO:0046872);; Biological Process: oxidation-reduction process (GO:0055114);;	K00430|0|pper:PRUPE_ppa008577mg|hypothetical protein; K00430 peroxidase [EC:1.11.1.7] (A)	Phenylalanine metabolism (ko00360);; Phenylpropanoid biosynthesis (ko00940)	Peroxidase 31 (Precursor) OS=Arabidopsis thaliana (Mouse-ear cress) PE=2 SV=1	G	Carbohydrate transport and metabolism	hypothetical protein PRUPE_ppa008577mg [Prunus persica]
gene1782	LOC107426604	2.828	3.66278	6.79889	1.54959	1.65567	2.11042	0.000234257	-1.32635027893135	down	[RTKL]	General function prediction only;; Signal transduction mechanisms;; Transcription;; Replication, recombination and repair	--	--	--	Probable LRR receptor-like serine/threonine-protein kinase At1g07650 (Precursor) GN=At1g07650 OS=Arabidopsis thaliana (Mouse-ear cress) PE=1 SV=1	T	Signal transduction mechanisms	PREDICTED: probable LRR receptor-like serine/threonine-protein kinase At1g07650 isoform X1 [Prunus mume]
gene15760	LOC107423864	31.0147	58.0874	127.131	29.9657	25.3256	30.3417	0.000384468	-1.33183773665133	down	[GC]	Carbohydrate transport and metabolism;; Energy production and conversion	Biological Process: xenobiotic metabolic process (GO:0006805);; Molecular Function: UDP-glucosyltransferase activity (GO:0035251);;	K08237|0|tcc:TCM_005182|UDP-Glycosyltransferase superfamily protein; K08237 hydroquinone glucosyltransferase [EC:2.4.1.218] (A)	--	Hydroquinone glucosyltransferase GN=AS OS=Rauvolfia serpentina (Serpentine wood) PE=1 SV=1	CG	Energy production and conversion;; Carbohydrate transport and metabolism	PREDICTED: hydroquinone glucosyltransferase-like [Nicotiana sylvestris]
gene4823	LOC107411852	2.57565	6.80838	8.09746	1.69584	2.46961	2.85392	0.00134368	-1.33184541835128	down	--	--	Molecular Function: peroxidase activity (GO:0004601);; Molecular Function: calcium ion binding (GO:0005509);; Cellular Component: integral component of membrane (GO:0016021);; Molecular Function: NAD(P)H oxidase activity (GO:0016174);; Biological Process: oxidation-reduction process (GO:0055114);;	K13447|0|cit:102610370|respiratory burst oxidase homolog protein B-like; K13447 respiratory burst oxidase [EC:1.6.3.- 1.11.1.-] (A)	Plant-pathogen interaction (ko04626)	Respiratory burst oxidase homolog protein B GN=RBOHB OS=Solanum tuberosum (Potato) PE=1 SV=1	PQ	Inorganic ion transport and metabolism;; Secondary metabolites biosynthesis, transport and catabolism	hypothetical protein CISIN_1g002711mg [Citrus sinensis]
gene33092	LOC107409971	11.6578	23.2286	37.4568	14.0032	4.88588	9.7136	0.00276724	-1.33211129162122	down	[P]	Inorganic ion transport and metabolism	Molecular Function: secondary active sulfate transmembrane transporter activity (GO:0008271);; Biological Process: sulfate transport (GO:0008272);; Cellular Component: integral component of membrane (GO:0016021);; Biological Process: transmembrane transport (GO:0055085);;	K17470|7.2153e-160|pper:PRUPE_ppa002542mg|hypothetical protein; K17470 sulfate transporter 1, high-affinity (A)	--	Sulfate transporter 1.1 GN=T3F12.7 OS=Arabidopsis thaliana (Mouse-ear cress) PE=1 SV=2	P	Inorganic ion transport and metabolism	hypothetical protein PRUPE_ppa002542mg [Prunus persica]
gene20527	LOC107429032	4.4941	6.49706	5.43258	0.641822	3.02737	2.77727	0.0186499	-1.33265605971677	down	--	--	Cellular Component: extracellular region (GO:0005576);; Biological Process: lipoprotein metabolic process (GO:0042157);;	--	--	Uncharacterized protein At5g01610 GN=At5g01610 OS=Arabidopsis thaliana (Mouse-ear cress) PE=1 SV=1	S	Function unknown	Uncharacterized protein TCM_011610 [Theobroma cacao]
gene7234	LOC107414538	40.2071	45.467	208.076	80.5287	17.356	20.6624	0.0273436	-1.33621036760963	down	--	--	Molecular Function: hydrolase activity, hydrolyzing O-glycosyl compounds (GO:0004553);; Biological Process: carbohydrate metabolic process (GO:0005975);;	K01183|7.19541e-146|pper:PRUPE_ppa009328mg|hypothetical protein; K01183 chitinase [EC:3.2.1.14] (A)	Amino sugar and nucleotide sugar metabolism (ko00520)	Acidic endochitinase (Precursor) OS=Cucumis sativus (Cucumber) PE=1 SV=1	G	Carbohydrate transport and metabolism	hypothetical protein PRUPE_ppa009328mg [Prunus persica]
gene18971	LOC107427333	1.1554	3.91105	7.93983	2.70544	0.770201	1.70013	0.0248435	-1.33623333680528	down	--	--	--	--	--	Probable BOI-related E3 ubiquitin-protein ligase 3 GN=BRG3 OS=Arabidopsis thaliana (Mouse-ear cress) PE=1 SV=1	O	Posttranslational modification, protein turnover, chaperones	PREDICTED: probable BOI-related E3 ubiquitin-protein ligase 3 [Malus domestica]
gene1880	LOC107427443	6.09431	8.28505	12.1235	2.69183	4.03513	3.81372	0.000157845	-1.3370638652735	down	[T]	Signal transduction mechanisms	Molecular Function: protein serine/threonine phosphatase activity (GO:0004722);; Biological Process: protein dephosphorylation (GO:0006470);; Molecular Function: metal ion binding (GO:0046872);;	K14803|3.58179e-158|fve:101296420|probable protein phosphatase 2C 27-like; K14803 protein phosphatase 2C homolog 2/3 [EC:3.1.3.16] (A)	--	Probable protein phosphatase 2C 27 OS=Oryza sativa subsp. japonica (Rice) PE=2 SV=1	T	Signal transduction mechanisms	PREDICTED: probable protein phosphatase 2C 27-like [Fragaria vesca subsp. vesca]
gene15619	LOC107423751	12.4728	16.6812	9.96246	4.25678	5.39928	6.07684	1.14589e-05	-1.33848335535072	down	--	--	--	--	--	Interactor of constitutive active ROPs 4 GN=F3F9.6 OS=Arabidopsis thaliana (Mouse-ear cress) PE=1 SV=2	S	Function unknown	PREDICTED: interactor of constitutive active ROPs 4-like [Prunus mume]
gene19193	LOC107427557	2.89685	8.89923	29.8072	4.15513	6.53518	5.83057	0.024578	-1.34060601684168	down	--	--	Molecular Function: hydrolase activity, hydrolyzing O-glycosyl compounds (GO:0004553);; Cellular Component: cell wall (GO:0005618);; Biological Process: cellular glucan metabolic process (GO:0006073);; Molecular Function: xyloglucan:xyloglucosyl transferase activity (GO:0016762);; Cellular Component: apoplast (GO:0048046);;	K08235|1.27281e-158|mdm:103443198|brassinosteroid-regulated protein BRU1-like; K08235 xyloglucan:xyloglucosyl transferase [EC:2.4.1.207] (A)	--	Xyloglucan endotransglucosylase/hydrolase 2 {ECO:0000250|UniProtKB:Q38857} (Precursor) OS=Glycine max (Soybean) PE=2 SV=1	R	General function prediction only	putative xyloglucan endotransglucosylase/hydrolase protein 16 [Morus notabilis]
gene18871	LOC107427219	7.76942	15.7055	27.5027	6.29877	6.4924	7.63703	0.000312621	-1.34242891400542	down	[RTKL]	General function prediction only;; Signal transduction mechanisms;; Transcription;; Replication, recombination and repair	Molecular Function: protein serine/threonine kinase activity (GO:0004674);; Molecular Function: non-membrane spanning protein tyrosine kinase activity (GO:0004715);; Molecular Function: ATP binding (GO:0005524);; Biological Process: protein phosphorylation (GO:0006468);;	--	--	Probable serine/threonine-protein kinase Cx32, chloroplastic (Precursor) GN=At4g35600 OS=Arabidopsis thaliana (Mouse-ear cress) PE=1 SV=2	T	Signal transduction mechanisms	hypothetical protein PRUPE_ppa006347mg [Prunus persica]
gene19029	LOC107427395	2.19534	2.16168	2.26055	0.849331	0.752822	0.985168	0.00086413	-1.34616952831265	down	[S]	Function unknown	Molecular Function: oxidoreductase activity (GO:0016491);;	--	--	--	R	General function prediction only	PREDICTED: 15-cis-phytoene desaturase, chloroplastic/chromoplastic-like [Prunus mume]
jujube_newGene_1222	--	3.11439	6.02572	14.8458	4.3277	2.45064	2.63335	0.00973159	-1.34770590435302	down	--	--	--	--	--	--	S	Function unknown	hypothetical protein JCGZ_15992 [Jatropha curcas]
gene22600	LOC107431267	2.79541	7.25461	13.2821	3.32382	3.16668	2.74022	0.00242054	-1.34813669953214	down	--	--	--	--	--	--	S	Function unknown	hypothetical protein JCGZ_00393 [Jatropha curcas]
gene2874	LOC107405544	0.569637	1.15791	1.9547	0.212286	0.660504	0.622852	0.0214564	-1.35013934285396	down	--	--	--	--	--	Wall-associated receptor kinase-like 2 (Precursor) GN=WAKL2 OS=Arabidopsis thaliana (Mouse-ear cress) PE=2 SV=1	T	Signal transduction mechanisms	hypothetical protein PRUPE_ppa024908mg, partial [Prunus persica]
gene12280	LOC107420076	4.90873	6.91262	20.0522	5.98729	4.10841	2.48966	0.00545405	-1.35073360089767	down	[KAD]	Transcription;; RNA processing and modification;; Cell cycle control, cell division, chromosome partitioning	--	K09422|1.0725e-101|tcc:TCM_037376|Duplicated homeodomain-like superfamily protein; K09422 myb proto-oncogene protein, plant (A)	--	Anthocyanin regulatory C1 protein GN=C1 OS=Zea mays (Maize) PE=2 SV=1	K	Transcription	Duplicated homeodomain-like superfamily protein [Theobroma cacao]
gene20992	LOC107429539	3.48224	6.16841	12.9634	2.88358	3.0337	2.92865	0.000579841	-1.35222228310061	down	[P]	Inorganic ion transport and metabolism	--	K01530|0|pmum:103341401|putative phospholipid-transporting ATPase 9; K01530 phospholipid-translocating ATPase [EC:3.6.3.1] (A)	--	Putative phospholipid-transporting ATPase 9 GN=ALA9 OS=Arabidopsis thaliana (Mouse-ear cress) PE=3 SV=1	P	Inorganic ion transport and metabolism	Putative phospholipid-transporting ATPase 9 [Morus notabilis]
gene12262	LOC107420055	0.835374	1.50089	3.77877	0.801156	0.884678	0.731966	0.0112433	-1.35982455007086	down	[RTKL]	General function prediction only;; Signal transduction mechanisms;; Transcription;; Replication, recombination and repair	Molecular Function: protein serine/threonine kinase activity (GO:0004674);; Molecular Function: non-membrane spanning protein tyrosine kinase activity (GO:0004715);; Molecular Function: ATP binding (GO:0005524);; Biological Process: protein phosphorylation (GO:0006468);; Biological Process: root hair cell differentiation (GO:0048765);;	--	--	Serine/threonine-protein kinase At5g01020 GN=At5g01020 OS=Arabidopsis thaliana (Mouse-ear cress) PE=1 SV=1	T	Signal transduction mechanisms	Serine/threonine-protein kinase [Morus notabilis]
gene1181	LOC107420719	12.8128	20.2276	30.161	9.40974	8.00624	6.61883	1.48316e-05	-1.3624501717176	down	[G]	Carbohydrate transport and metabolism	Molecular Function: protein serine/threonine kinase activity (GO:0004674);; Molecular Function: ATP binding (GO:0005524);; Cellular Component: peroxisome (GO:0005777);; Biological Process: protein phosphorylation (GO:0006468);; Biological Process: fatty acid biosynthetic process (GO:0006633);; Biological Process: phospholipid biosynthetic process (GO:0008654);; Cellular Component: membrane (GO:00…	K01578|0|pmum:103324434|malonyl-CoA decarboxylase, mitochondrial; K01578 malonyl-CoA decarboxylase [EC:4.1.1.9] (A)	beta-Alanine metabolism (ko00410);; Propanoate metabolism (ko00640);; Peroxisome (ko04146)	--	G	Carbohydrate transport and metabolism	PREDICTED: malonyl-CoA decarboxylase, mitochondrial [Prunus mume]
gene193	LOC107428451	0.308684	0.318767	0.906468	0.190037	0.106961	0.299028	0.0185643	-1.36515367945868	down	--	--	--	K13459|0|pop:POPTR_0001s415402|hypothetical protein; K13459 disease resistance protein RPS2 (A)	Plant-pathogen interaction (ko04626)	Disease resistance protein At4g27190 GN=At4g27190 OS=Arabidopsis thaliana (Mouse-ear cress) PE=2 SV=1	T	Signal transduction mechanisms	putative disease resistance protein [Morus notabilis]
gene24030	LOC107432849	3.1594	7.08824	14.4672	3.23451	2.91649	3.35466	0.00135508	-1.36798111611551	down	[G]	Carbohydrate transport and metabolism	Molecular Function: glucokinase activity (GO:0004340);; Molecular Function: ATP binding (GO:0005524);; Cellular Component: nucleus (GO:0005634);; Cellular Component: mitochondrion (GO:0005739);; Cellular Component: vacuole (GO:0005773);; Cellular Component: plasma membrane (GO:0005886);; Biological Process: glycolytic process (GO:0006096);; Molecular Function: zinc ion binding (GO:0008270);; Mole…	K00844|0|cit:102577960|hexokinase; K00844 hexokinase [EC:2.7.1.1] (A)	Glycolysis / Gluconeogenesis (ko00010);; Fructose and mannose metabolism (ko00051);; Galactose metabolism (ko00052);; Starch and sucrose metabolism (ko00500);; Amino sugar and nucleotide sugar metabolism (ko00520);; Carbon metabolism (ko01200)	Hexokinase-1 GN=F19B15.160 OS=Arabidopsis thaliana (Mouse-ear cress) PE=1 SV=2	G	Carbohydrate transport and metabolism	hypothetical protein JCGZ_07372 [Jatropha curcas]
gene2220	LOC107431359	8.44507	4.99224	22.0474	5.46063	3.81829	4.24249	0.00262116	-1.36924887006417	down	[GEPR]	Carbohydrate transport and metabolism;; Amino acid transport and metabolism;; Inorganic ion transport and metabolism;; General function prediction only	--	K08202|0|fve:101296978|organic cation/carnitine transporter 4-like; K08202 MFS transporter, OCT family, solute carrier family 22 (organic cation transporter), member 4/5 (A)	--	Organic cation/carnitine transporter 4 GN=F3H11.5 OS=Arabidopsis thaliana (Mouse-ear cress) PE=2 SV=1	R	General function prediction only	PREDICTED: organic cation/carnitine transporter 4-like [Fragaria vesca subsp. vesca]
gene1078	LOC107418929	4.59246	4.86515	5.90992	2.40816	1.3727	2.20427	7.13459e-06	-1.37235897761284	down	[RTKL]	General function prediction only;; Signal transduction mechanisms;; Transcription;; Replication, recombination and repair	Molecular Function: protein serine/threonine kinase activity (GO:0004674);; Molecular Function: ATP binding (GO:0005524);; Biological Process: protein phosphorylation (GO:0006468);;	--	--	Probable LRR receptor-like serine/threonine-protein kinase At1g56130 (Precursor) GN=At1g56130 OS=Arabidopsis thaliana (Mouse-ear cress) PE=2 SV=2	T	Signal transduction mechanisms	PREDICTED: LOW QUALITY PROTEIN: uncharacterized protein LOC103325393 [Prunus mume]
gene1835	LOC107427046	2.02203	3.64132	6.0096	1.76138	1.41936	1.33398	0.000610492	-1.372970957322	down	--	--	Molecular Function: calmodulin binding (GO:0005516);;	--	--	--	S	Function unknown	hypothetical protein PRUPE_ppa002988mg [Prunus persica]
jujube_newGene_2613	--	175.375	371.123	451.601	133.815	126.287	118.049	1.21e-05	-1.375293149	down	--	--	--	--	--	--	--	--	--
gene14375	LOC107422361	21.5569	37.9299	18.139	9.63617	7.96349	12.6915	1.90383e-05	-1.37648750378991	down	[MG]	Cell wall/membrane/envelope biogenesis;; Carbohydrate transport and metabolism	Molecular Function: nucleotide binding (GO:0000166);; Cellular Component: endosome (GO:0005768);; Cellular Component: trans-Golgi network (GO:0005802);; Biological Process: carbohydrate metabolic process (GO:0005975);; Biological Process: tryptophan catabolic process (GO:0006569);; Biological Process: nucleotide-sugar metabolic process (GO:0009225);; Biological Process: indoleacetic acid biosynth…	K08679|0|pper:PRUPE_ppa005434mg|hypothetical protein; K08679 UDP-glucuronate 4-epimerase [EC:5.1.3.6] (A)	Starch and sucrose metabolism (ko00500);; Amino sugar and nucleotide sugar metabolism (ko00520)	UDP-glucuronate 4-epimerase 6 GN=F14O13.1 OS=Arabidopsis thaliana (Mouse-ear cress) PE=1 SV=1	G	Carbohydrate transport and metabolism	hypothetical protein PRUPE_ppa005434mg [Prunus persica]
gene7576	LOC107414929	3.14619	3.18336	21.222	4.39604	1.99453	4.14251	0.0407735	-1.38048019042597	down	--	--	--	K14488|1.49233e-47|tcc:TCM_015490|SAUR family protein; K14488 SAUR family protein (A)	Plant hormone signal transduction (ko04075)	Auxin-induced protein 10A5 OS=Glycine max (Soybean) PE=2 SV=1	S	Function unknown	SAUR family protein [Theobroma cacao]
gene8644	LOC107416097	2.32047	4.62724	5.81107	0.865969	1.68796	2.33176	0.00232572	-1.38689178306637	down	[V]	Defense mechanisms	Molecular Function: transmembrane transporter activity (GO:0022857);; Biological Process: transmembrane transport (GO:0055085);;	K03327|0|pmum:103328653|MATE efflux family protein 5; K03327 multidrug resistance protein, MATE family (A)	--	MATE efflux family protein 9 GN=F3L12.7 OS=Arabidopsis thaliana (Mouse-ear cress) PE=2 SV=1	S	Function unknown	PREDICTED: MATE efflux family protein 5 [Prunus mume]
gene17317	LOC107425535	24.8995	71.2333	144.362	19.688	31.7296	40.5311	0.0018988	-1.38788857835254	down	[HC]	Coenzyme transport and metabolism;; Energy production and conversion	Molecular Function: zeaxanthin epoxidase [overall] activity (GO:0009540);; Molecular Function: zeaxanthin epoxidase activity (GO:0052662);; Molecular Function: antheraxanthin epoxidase activity (GO:0052663);; Biological Process: oxidation-reduction process (GO:0055114);;	--	--	Zeaxanthin epoxidase, chloroplastic (Precursor) GN=OSJNBa0064H22.16 OS=Oryza sativa subsp. japonica (Rice) PE=2 SV=1	C	Energy production and conversion	PREDICTED: zeaxanthin epoxidase, chloroplastic-like [Pyrus x bretschneideri]
gene852	LOC107416506	195.338	252.432	398.852	104.911	113.722	100.895	3.09915e-08	-1.39556488347893	down	[H]	Coenzyme transport and metabolism	Molecular Function: dimethylallyltranstransferase activity (GO:0004161);; Molecular Function: geranyltranstransferase activity (GO:0004337);; Cellular Component: cytoplasm (GO:0005737);; Biological Process: cholesterol biosynthetic process (GO:0006695);; Biological Process: geranyl diphosphate biosynthetic process (GO:0033384);; Biological Process: farnesyl diphosphate biosynthetic process (GO:00…	K00787|0|pop:POPTR_0006s00530g|POPTRDRAFT_560081; farnesyl-pyrophosphate synthetase fps2 family protein; K00787 farnesyl diphosphate synthase [EC:2.5.1.1 2.5.1.10] (A)	Terpenoid backbone biosynthesis (ko00900)	Farnesyl pyrophosphate synthase 1 GN=FPS1 OS=Lupinus albus (White lupin) PE=2 SV=1	H	Coenzyme transport and metabolism	farnesyl-pyrophosphate synthetase fps2 family protein [Populus trichocarpa]
gene33220	LOC107410110	2.56073	10.3014	13.4209	4.12328	2.69268	3.39571	0.00646001	-1.39665990744285	down	--	--	Molecular Function: DNA binding (GO:0003677);; Biological Process: regulation of transcription, DNA-templated (GO:0006355);;	--	--	GATA transcription factor 7 GN=GATA7 OS=Arabidopsis thaliana (Mouse-ear cress) PE=2 SV=1	K	Transcription	hypothetical protein PRUPE_ppa008278mg [Prunus persica]
gene13064	LOC107420890	15.9312	7.22993	7.43759	5.32349	3.2742	2.78264	0.000328393	-1.39726927311681	down	[R]	General function prediction only	Biological Process: lipid metabolic process (GO:0006629);; Molecular Function: hydrolase activity (GO:0016787);;	--	--	Patatin-like protein 2 GN=PLP2 OS=Arabidopsis thaliana (Mouse-ear cress) PE=1 SV=1	I	Lipid transport and metabolism	Patatin group A-3 [Morus notabilis]
gene6891	LOC107414181	6.20066	4.63156	16.9308	3.27455	3.33373	3.85386	0.000839068	-1.40391937805522	down	--	--	--	--	--	WRKY transcription factor 6 GN=WRKY6 OS=Arabidopsis thaliana (Mouse-ear cress) PE=1 SV=1	K	Transcription	hypothetical protein PRUPE_ppa002619mg [Prunus persica]
gene18843	LOC107427181	2.54466	3.48589	8.23399	1.31374	0.712065	3.30944	0.011508	-1.40884249693869	down	--	--	Biological Process: transport (GO:0006810);; Cellular Component: integral component of membrane (GO:0016021);;	K15102|0|pper:PRUPE_ppa009035mg|hypothetical protein; K15102 solute carrier family 25 (mitochondrial phosphate transporter), member 3 (A)	--	Mitochondrial phosphate carrier protein 1, mitochondrial GN=F5J6 OS=Arabidopsis thaliana (Mouse-ear cress) PE=2 SV=1	C	Energy production and conversion	hypothetical protein PRUPE_ppa009035mg [Prunus persica]
gene28984	LOC107405517	4.79437	6.78003	20.8431	3.92865	3.30676	4.95523	0.00286235	-1.40919407250168	down	--	--	Biological Process: calcium ion transport (GO:0006816);; Molecular Function: calcium:proton antiporter activity (GO:0015369);; Cellular Component: integral component of membrane (GO:0016021);; Biological Process: transmembrane transport (GO:0055085);;	K07300|9.70832e-162|pmum:103341993|vacuolar cation/proton exchanger 3; K07300 Ca2+:H+ antiporter (A)	--	Vacuolar cation/proton exchanger 3 GN=CAX3 OS=Arabidopsis thaliana (Mouse-ear cress) PE=1 SV=1	P	Inorganic ion transport and metabolism	Vacuolar cation/proton exchanger 3 [Morus notabilis]
gene8309	LOC107415719	1.65783	2.64683	1.49472	0.0688809	1.01172	1.10671	0.0257481	-1.40929244318336	down	--	--	--	--	--	--	S	Function unknown	NC domain-containing family protein [Populus trichocarpa]
gene16144	LOC107424292	4.86512	10.3509	24.5191	5.16564	4.16127	5.70769	0.00512517	-1.40966549346757	down	--	--	Cellular Component: integral component of membrane (GO:0016021);;	--	--	Lysine histidine transporter-like 8 GN=AATL1 OS=Arabidopsis thaliana (Mouse-ear cress) PE=1 SV=1	E	Amino acid transport and metabolism	PREDICTED: lysine histidine transporter-like 8 [Vitis vinifera]
gene1348	LOC107421470	0.518368	1.03132	0.468143	0.0885811	0.203646	0.526558	0.0166399	-1.41137693954105	down	--	--	Molecular Function: magnesium ion binding (GO:0000287);; Cellular Component: cytosol (GO:0005829);; Cellular Component: plastid (GO:0009536);; Molecular Function: terpene synthase activity (GO:0010333);; Biological Process: terpenoid biosynthetic process (GO:0016114);;	K15086|0|pper:PRUPE_ppa003380mg|hypothetical protein; K15086 (3S)-linalool synthase [EC:4.2.3.25] (A)	Monoterpenoid biosynthesis (ko00902)	(3S,6E)-nerolidol synthase 2, chloroplastic/mitochondrial (Precursor) OS=Fragaria ananassa (Strawberry) PE=1 SV=1	R	General function prediction only	terpene synthase [Prunus cerasoides var. campanulata]
gene20922	LOC107429448	8.06474	10.0095	30.4851	2.99468	8.07009	6.99832	0.00383324	-1.4134534973742	down	--	--	--	--	--	--	S	Function unknown	hypothetical protein PRUPE_ppa013354mg [Prunus persica]
gene16443	LOC107424617	0.994651	4.28311	5.46177	1.28061	0.671086	1.96384	0.00879577	-1.4164546226133	down	--	--	Molecular Function: peroxidase activity (GO:0004601);; Molecular Function: calcium ion binding (GO:0005509);; Cellular Component: integral component of membrane (GO:0016021);; Molecular Function: oxidoreductase activity, acting on NAD(P)H, oxygen as acceptor (GO:0050664);; Biological Process: oxidation-reduction process (GO:0055114);;	K13447|0|tcc:TCM_034030|Respiratory burst oxidase D; K13447 respiratory burst oxidase [EC:1.6.3.- 1.11.1.-] (A)	Plant-pathogen interaction (ko04626)	Respiratory burst oxidase homolog protein D GN=RBOHD OS=Arabidopsis thaliana (Mouse-ear cress) PE=1 SV=1	PQ	Inorganic ion transport and metabolism;; Secondary metabolites biosynthesis, transport and catabolism	Respiratory burst oxidase D [Theobroma cacao]
jujube_newGene_1945	--	4.81376	8.42587	8.70047	2.82045	2.51865	2.00068	7.20018e-05	-1.41749340772193	down	[Q]	Secondary metabolites biosynthesis, transport and catabolism	--	K15639|2.48014e-155|fve:101301286|cytochrome P450 734A1-like; K15639 PHYB activation tagged suppressor 1 [EC:1.14.-.-] (A)	Brassinosteroid biosynthesis (ko00905)	Cytochrome P450 CYP749A22 OS=Panax ginseng (Korean ginseng) PE=2 SV=1	Q	Secondary metabolites biosynthesis, transport and catabolism	Cytochrome P450 734A1 [Morus notabilis]
gene10428	LOC107418007	4.75588	6.68999	12.5997	2.40867	3.58093	2.96796	0.000127939	-1.41886929490988	down	--	--	Molecular Function: acid phosphatase activity (GO:0003993);; Molecular Function: metal ion binding (GO:0046872);;	--	--	Probable inactive purple acid phosphatase 27 (Precursor) GN=PAP27 OS=Arabidopsis thaliana (Mouse-ear cress) PE=2 SV=1	G	Carbohydrate transport and metabolism	Purple acid phosphatase 27 [Theobroma cacao]
gene19940	LOC107428374	104.298	193.65	295.41	66.6225	59.66	93.2348	2.28899e-05	-1.42326014113217	down	--	--	Cellular Component: peroxisome (GO:0005777);;	--	--	--	S	Function unknown	PREDICTED: uncharacterized protein LOC101222643 [Cucumis sativus]
gene5568	LOC107412713	186.756	339.935	64.3532	59.2958	67.3439	94.5269	0.000844778	-1.4247510966043	down	--	--	Cellular Component: cell wall (GO:0005618);; Biological Process: defense response (GO:0006952);; Biological Process: signal transduction (GO:0007165);; Cellular Component: plasmodesma (GO:0009506);; Cellular Component: chloroplast (GO:0009507);; Cellular Component: membrane (GO:0016020);; Cellular Component: apoplast (GO:0048046);;	--	--	DNA-damage-repair/toleration protein DRT100 (Precursor) OS=Arabidopsis thaliana (Mouse-ear cress) PE=2 SV=2	R	General function prediction only	DNA-damage-repair/toleration protein [Morus notabilis]
jujube_newGene_2732	--	0.824215	2.96867	6.60246	0.870197	1.83579	1.19318	0.0248896	-1.42671820232172	down	[R]	General function prediction only	Molecular Function: iron ion binding (GO:0005506);; Molecular Function: oxidoreductase activity, acting on single donors with incorporation of molecular oxygen, incorporation of two atoms of oxygen (GO:0016702);; Molecular Function: oxidoreductase activity, acting on paired donors, with incorporation or reduction of molecular oxygen, 2-oxoglutarate as one donor, and incorporation of one atom each…	K04125|1.41683e-55|pper:PRUPE_ppa008211mg|hypothetical protein; K04125 gibberellin 2-oxidase [EC:1.14.11.13] (A)	Diterpenoid biosynthesis (ko00904)	Gibberellin 2-beta-dioxygenase GN=GA2OX1 OS=Phaseolus coccineus (Scarlet runner bean) PE=2 SV=1	Q	Secondary metabolites biosynthesis, transport and catabolism	hypothetical protein PRUPE_ppa008211mg [Prunus persica]
gene380	LOC107411400	9.47933	20.6498	29.6401	6.69333	7.2879	8.16887	4.43519e-05	-1.43006467771748	down	--	--	--	--	--	3&apos;-N-debenzoyl-2&apos;-deoxytaxol N-benzoyltransferase GN=TAX10 OS=Taxus canadensis (Canadian yew) PE=1 SV=1	S	Function unknown	hypothetical protein PRUPE_ppa005640mg [Prunus persica]
gene5098	LOC107412228	23.6072	44.3785	52.0271	13.3039	12.6444	19.028	2.46022e-06	-1.43166368843398	down	--	--	--	--	--	Protein WVD2-like 1 GN=WDL1 OS=Arabidopsis thaliana (Mouse-ear cress) PE=1 SV=1	S	Function unknown	hypothetical protein L484_024558 [Morus notabilis]
gene13237	LOC107421107	37.432	34.6229	82.5971	25.7653	15.7178	15.8734	4.42408e-05	-1.43405779837526	down	[TZDR]	Signal transduction mechanisms;; Cytoskeleton;; Cell cycle control, cell division, chromosome partitioning;; General function prediction only	--	K13448|5.05601e-60|pper:PRUPE_ppa023006mg|hypothetical protein; K13448 calcium-binding protein CML (A)	Plant-pathogen interaction (ko04626)	Probable calcium-binding protein CML44 GN=CML44 OS=Arabidopsis thaliana (Mouse-ear cress) PE=2 SV=2	T	Signal transduction mechanisms	hypothetical protein PRUPE_ppa023006mg [Prunus persica]
jujube_newGene_2617	--	14.1593	7.56018	45.3604	12.6208	7.00435	4.60449	0.0137533	-1.434354455	down	--	--	--	--	--	--	--	--	--
gene12174	LOC107420012	49.3606	108.721	220.78	19.6386	54.9373	63.5211	0.00191489	-1.43557092727111	down	[E]	Amino acid transport and metabolism	--	K13051|0|pxb:103945320|probable isoaspartyl peptidase/L-asparaginase 2; K13051 beta-aspartyl-peptidase (threonine type) [EC:3.4.19.5] (A)	--	Isoaspartyl peptidase/L-asparaginase 2 subunit beta (Precursor) GN=At3g16150 OS=Arabidopsis thaliana (Mouse-ear cress) PE=2 SV=2	E	Amino acid transport and metabolism	putative isoaspartyl peptidase/L-asparaginase 2 [Morus notabilis]
gene29180	LOC107405743	43.4488	74.6591	172.452	50.2113	23.0252	34.4414	0.000410451	-1.43834464512982	down	[Q]	Secondary metabolites biosynthesis, transport and catabolism	Molecular Function: iron ion binding (GO:0005506);; Molecular Function: electron carrier activity (GO:0009055);; Molecular Function: heme binding (GO:0020037);; Molecular Function: isoflavone 2'-hydroxylase activity (GO:0033773);; Biological Process: oxidation-reduction process (GO:0055114);;	K13260|0|fve:101304511|isoflavone 2'-hydroxylase-like; K13260 isoflavone 2'-hydroxylase [EC:1.14.13.89] (A)	Isoflavonoid biosynthesis (ko00943)	Cytochrome P450 81E8 {ECO:0000303|PubMed:14617078} OS=Medicago truncatula (Barrel medic) PE=2 SV=1	Q	Secondary metabolites biosynthesis, transport and catabolism	Isoflavone 2&apos;-hydroxylase [Morus notabilis]
gene19767	LOC107428173	4.79599	11.9034	18.0887	1.54509	5.33478	5.99394	0.0047945	-1.43889329249907	down	[IQ]	Lipid transport and metabolism;; Secondary metabolites biosynthesis, transport and catabolism	Biological Process: metabolic process (GO:0008152);; Molecular Function: 4-coumarate-CoA ligase activity (GO:0016207);;	K01904|1.75571e-38|pxb:103945464|4-coumarate--CoA ligase 1-like; K01904 4-coumarate--CoA ligase [EC:6.2.1.12] (A)	Ubiquinone and other terpenoid-quinone biosynthesis (ko00130);; Phenylalanine metabolism (ko00360);; Phenylpropanoid biosynthesis (ko00940)	4-coumarate--CoA ligase 1 (Fragment) OS=Glycine max (Soybean) PE=2 SV=1	H	Coenzyme transport and metabolism	4-coumarate coenzyme A ligase [Eriobotrya japonica]
gene1378	LOC107421716	3.70734	8.05142	13.7046	3.0554	2.40324	3.93389	0.000365897	-1.43891330536639	down	[RTKL]	General function prediction only;; Signal transduction mechanisms;; Transcription;; Replication, recombination and repair	--	--	--	G-type lectin S-receptor-like serine/threonine-protein kinase At1g61490 (Precursor) GN=At1g61490 OS=Arabidopsis thaliana (Mouse-ear cress) PE=3 SV=1	T	Signal transduction mechanisms	PREDICTED: G-type lectin S-receptor-like serine/threonine-protein kinase At1g61500 [Prunus mume]
gene1763	LOC107426239	3.13147	9.50988	14.3741	4.23605	2.85713	2.98897	0.00133955	-1.44308923513287	down	[R]	General function prediction only	--	K07297|5.99105e-151|tcc:TCM_038440|Heptahelical transmembrane protein2; K07297 adiponectin receptor (A)	--	Heptahelical transmembrane protein 2 GN=HHP2 OS=Arabidopsis thaliana (Mouse-ear cress) PE=2 SV=1	T	Signal transduction mechanisms	PREDICTED: heptahelical transmembrane protein 2 [Populus euphratica]
gene26332	LOC107435376	1.30657	2.46902	4.54698	0.892307	1.29252	0.873096	0.00128125	-1.44882252167183	down	--	--	Molecular Function: ACP phosphopantetheine attachment site binding involved in fatty acid biosynthetic process (GO:0000036);; Molecular Function: oleoyl-[acyl-carrier-protein] hydrolase activity (GO:0004320);; Biological Process: fatty acid biosynthetic process (GO:0006633);; Cellular Component: plastid (GO:0009536);; Molecular Function: myristoyl-[acyl-carrier-protein] hydrolase activity (GO:001…	K10781|0|pper:PRUPE_ppa006328mg|hypothetical protein; K10781 fatty acyl-ACP thioesterase B [EC:3.1.2.14 3.1.2.21] (A)	Fatty acid biosynthesis (ko00061);; Fatty acid metabolism (ko01212)	Palmitoyl-acyl carrier protein thioesterase, chloroplastic (Precursor) GN=FATB1 OS=Gossypium hirsutum (Upland cotton) PE=1 SV=1	I	Lipid transport and metabolism	fatty acyl-ACP thioesterase B [Prunus sibirica]
gene2935	LOC107406053	1628.69	1674.84	3629.95	942.06	883.785	695.126	6.04093e-07	-1.44937160602021	down	--	--	Molecular Function: chitinase activity (GO:0004568);; Biological Process: carbohydrate metabolic process (GO:0005975);; Biological Process: chitin catabolic process (GO:0006032);; Molecular Function: chitin binding (GO:0008061);; Biological Process: cell wall macromolecule catabolic process (GO:0016998);;	K01183|1.08025e-100|pmum:103322384|chitinase 5-like; K01183 chitinase [EC:3.2.1.14] (A)	Amino sugar and nucleotide sugar metabolism (ko00520)	Endochitinase PR4 (Precursor) GN=CHI4 OS=Phaseolus vulgaris (Kidney bean) PE=2 SV=1	G	Carbohydrate transport and metabolism	PREDICTED: chitinase 5-like [Prunus mume]
gene2586	LOC107435017	17.5351	23.0616	61.6329	15.5065	8.92175	7.7855	0.00123133	-1.44964642650282	down	--	--	--	--	--	GDSL esterase/lipase 1 (Precursor) GN=GLIP1 OS=Arabidopsis thaliana (Mouse-ear cress) PE=1 SV=1	I	Lipid transport and metabolism	GDSL esterase/lipase 1 [Morus notabilis]
gene14956	LOC107423010	0.225939	0.948096	1.36361	0.186404	0.653148	0.127719	0.0367868	-1.45091392315649	down	--	--	--	--	--	Probable nucleoredoxin 1 GN=At1g60420 OS=Arabidopsis thaliana (Mouse-ear cress) PE=1 SV=1	S	Function unknown	PREDICTED: uncharacterized protein LOC101298363 [Fragaria vesca subsp. vesca]
gene26640	LOC107435716	1063.35	2057.16	2529.08	689.146	685.787	672.351	1.56e-07	-1.456355516	down	--	--	--	--	--	--	--	--	--
gene19879	LOC107428294	1.7682	1.84812	6.37005	2.35842	0.85905	1.17814	0.0111219	-1.46000202824622	down	--	--	Molecular Function: binding (GO:0005488);;	--	--	Putative Myb family transcription factor At1g14600 GN=At1g14600 OS=Arabidopsis thaliana (Mouse-ear cress) PE=2 SV=2	K	Transcription	PREDICTED: myb family transcription factor APL isoform X2 [Vitis vinifera]
gene1562	LOC107423895	0.944068	1.69742	1.74603	0.449922	0.609404	0.613768	0.00277323	-1.46205150254076	down	--	--	Biological Process: fatty acid biosynthetic process (GO:0006633);; Cellular Component: integral component of membrane (GO:0016021);; Biological Process: sphingolipid biosynthetic process (GO:0030148);; Molecular Function: sphingolipid delta-4 desaturase activity (GO:0042284);; Biological Process: oxidation-reduction process (GO:0055114);;	K04712|0|tcc:TCM_029899|Fatty acid desaturase family protein isoform 1; K04712 sphingolipid delta-4 desaturase [EC:1.14.-.-] (A)	Sphingolipid metabolism (ko00600)	Sphingolipid delta(4)-desaturase DES1-like GN=At4g04930 OS=Arabidopsis thaliana (Mouse-ear cress) PE=2 SV=1	I	Lipid transport and metabolism	Fatty acid desaturase family protein isoform 1 [Theobroma cacao]
jujube_newGene_2255	--	3.49423	5.95042	14.0665	1.65978	3.01653	3.56956	0.00491044	-1.46241222397037	down	--	--	--	--	--	Alcohol dehydrogenase 1 GN=ADH1 OS=Trifolium repens (Creeping white clover) PE=2 SV=1	--	--	--
gene30271	LOC107406906	10.7919	7.03698	12.6639	4.14042	2.61109	4.28839	1.65095e-05	-1.46693932012656	down	[Q]	Secondary metabolites biosynthesis, transport and catabolism	Molecular Function: oxidoreductase activity, acting on single donors with incorporation of molecular oxygen, incorporation of two atoms of oxygen (GO:0016702);;	K09840|0|cic:CICLE_v10014639mg|hypothetical protein; K09840 9-cis-epoxycarotenoid dioxygenase [EC:1.13.11.51] (A)	Carotenoid biosynthesis (ko00906)	9-cis-epoxycarotenoid dioxygenase NCED1, chloroplastic (Precursor) GN=NCED1 OS=Phaseolus vulgaris (Kidney bean) PE=2 SV=1	Q	Secondary metabolites biosynthesis, transport and catabolism	hypothetical protein CISIN_1g007291mg [Citrus sinensis]
gene21672	LOC107430260	107.159	235.514	435.707	92.3635	80.5274	106.376	9.51162e-05	-1.46852216163634	down	--	--	--	--	--	Lipid transfer-like protein VAS (Precursor) GN=VAS OS=Arabidopsis thaliana (Mouse-ear cress) PE=2 SV=1	R	General function prediction only	PREDICTED: lipid transfer-like protein VAS [Nicotiana tomentosiformis]
gene23383	LOC107432136	1.18913	3.29415	6.4806	2.11637	0.822521	1.04096	0.00928308	-1.47561182218868	down	--	--	--	--	--	Putative DNA-binding protein ESCAROLA GN=ESC OS=Arabidopsis thaliana (Mouse-ear cress) PE=2 SV=1	S	Function unknown	hypothetical protein PRUPE_ppa024471mg, partial [Prunus persica]
gene26489	LOC107435537	0.0959379	1.67748	2.31697	0.297682	0.438317	0.727349	0.0452283	-1.47735936029122	down	--	--	Biological Process: zinc ion transport (GO:0006829);; Biological Process: single-organism cellular process (GO:0044763);;	--	--	--	S	Function unknown	hypothetical protein L484_019483 [Morus notabilis]
gene12383	LOC107420289	4.82022	7.07847	4.52408	1.38711	1.97983	2.56121	9.25766e-05	-1.47936047670386	down	[MG]	Cell wall/membrane/envelope biogenesis;; Carbohydrate transport and metabolism	Molecular Function: nucleotide binding (GO:0000166);; Biological Process: anthocyanin-containing compound biosynthetic process (GO:0009718);; Biological Process: cellular metabolic process (GO:0044237);; Molecular Function: dihydrokaempferol 4-reductase activity (GO:0045552);; Molecular Function: coenzyme binding (GO:0050662);; Biological Process: oxidation-reduction process (GO:0055114);;	K13082|0|pper:PRUPE_ppa008069mg|hypothetical protein; K13082 bifunctional dihydroflavonol 4-reductase/flavanone 4-reductase [EC:1.1.1.219 1.1.1.234] (A)	Flavonoid biosynthesis (ko00941)	Bifunctional dihydroflavonol 4-reductase/flavanone 4-reductase GN=DFR OS=Malus domestica (Apple) PE=1 SV=1	Q	Secondary metabolites biosynthesis, transport and catabolism	dihydroflavonol 4-reductase [Prunus avium]
gene17928	LOC107426166	0.288209	0.880085	0.906935	0.27053	0.310562	0.18209	0.00328604	-1.48007831859876	down	[V]	Defense mechanisms	Molecular Function: ATP binding (GO:0005524);; Biological Process: ATP catabolic process (GO:0006200);; Cellular Component: integral component of membrane (GO:0016021);; Molecular Function: ATPase activity, coupled to transmembrane movement of substances (GO:0042626);; Biological Process: transmembrane transport (GO:0055085);;	K05658|0|pmum:103327260|ABC transporter B family member 11-like; K05658 ATP-binding cassette, subfamily B (MDR/TAP), member 1 [EC:3.6.3.44] (A)	ABC transporters (ko02010)	ABC transporter B family member 11 GN=T14P4.15 OS=Arabidopsis thaliana (Mouse-ear cress) PE=2 SV=1	Q	Secondary metabolites biosynthesis, transport and catabolism	PREDICTED: ABC transporter B family member 11-like [Prunus mume]
gene21355	LOC107429926	76.2362	71.0216	189.49	41.5953	42.4676	35.5056	1.29517e-05	-1.48064356264053	down	--	--	Biological Process: defense response to bacterium, incompatible interaction (GO:0009816);; Biological Process: defense response to fungus, incompatible interaction (GO:0009817);;	--	--	Osmotin-like protein OSM34 (Precursor) GN=OSM34 OS=Arabidopsis thaliana (Mouse-ear cress) PE=2 SV=2	R	General function prediction only	osmotin-like protein I [Gossypium hirsutum]
gene20681	LOC107429185	0.904584	2.32829	3.57089	0.944847	0.642592	0.854026	0.00211709	-1.48251761348091	down	[RTKL]	General function prediction only;; Signal transduction mechanisms;; Transcription;; Replication, recombination and repair	--	--	--	G-type lectin S-receptor-like serine/threonine-protein kinase RLK1 (Precursor) GN=RLK1 OS=Arabidopsis thaliana (Mouse-ear cress) PE=2 SV=2	T	Signal transduction mechanisms	PREDICTED: G-type lectin S-receptor-like serine/threonine-protein kinase RLK1-like [Glycine max]
gene1854	LOC107427259	5.49959	14.7683	6.5887	3.6982	3.00762	3.08342	0.000103167	-1.48331420090523	down	[Q]	Secondary metabolites biosynthesis, transport and catabolism	Biological Process: response to water deprivation (GO:0009414);; Cellular Component: chloroplast thylakoid membrane (GO:0009535);; Cellular Component: chloroplast stroma (GO:0009570);; Biological Process: hyperosmotic salinity response (GO:0042538);; Molecular Function: 9-cis-epoxycarotenoid dioxygenase activity (GO:0045549);;	K09840|0|tcc:TCM_032343|Nine-cis-epoxycarotenoid dioxygenase 3; K09840 9-cis-epoxycarotenoid dioxygenase [EC:1.13.11.51] (A)	Carotenoid biosynthesis (ko00906)	9-cis-epoxycarotenoid dioxygenase NCED1, chloroplastic (Precursor) GN=NCED1 OS=Phaseolus vulgaris (Kidney bean) PE=2 SV=1	Q	Secondary metabolites biosynthesis, transport and catabolism	Nine-cis-epoxycarotenoid dioxygenase 3 [Theobroma cacao]
gene20905	LOC107429428	11.2226	25.1979	43.5897	16.5198	6.13228	6.49867	0.00161342	-1.48338011006614	down	--	--	--	--	--	--	S	Function unknown	PREDICTED: ceramide-1-phosphate transfer protein [Prunus mume]
gene10219	LOC107417803	1.16482	2.77225	4.49323	1.10295	0.731228	0.794587	0.000287674	-1.48427101532021	down	[P]	Inorganic ion transport and metabolism	Molecular Function: calcium-transporting ATPase activity (GO:0005388);; Molecular Function: calmodulin binding (GO:0005516);; Molecular Function: ATP binding (GO:0005524);; Cellular Component: integral component of membrane (GO:0016021);; Molecular Function: metal ion binding (GO:0046872);; Biological Process: calcium ion transmembrane transport (GO:0070588);;	K01537|0|pmum:103343496|calcium-transporting ATPase 4, plasma membrane-type-like; K01537 Ca2+-transporting ATPase [EC:3.6.3.8] (A)	--	Putative calcium-transporting ATPase 11, plasma membrane-type GN=ACA11 OS=Arabidopsis thaliana (Mouse-ear cress) PE=1 SV=1	P	Inorganic ion transport and metabolism	Putative calcium-transporting ATPase 11, plasma membrane-type [Morus notabilis]
gene23735	LOC107432575	2.49611	12.9687	20.8034	3.30759	2.97899	5.70249	0.00416621	-1.48481144435936	down	--	--	Molecular Function: extracellular ligand-gated ion channel activity (GO:0005230);; Biological Process: transport (GO:0006810);; Cellular Component: membrane (GO:0016020);; Biological Process: single-organism process (GO:0044699);;	K05387|0|pper:PRUPE_ppa017547mg|hypothetical protein; K05387 glutamate receptor, ionotropic, plant (A)	--	Glutamate receptor 2.7 (Precursor) GN=GLR2.7 OS=Arabidopsis thaliana (Mouse-ear cress) PE=2 SV=3	EPT	Amino acid transport and metabolism;; Inorganic ion transport and metabolism;; Signal transduction mechanisms	hypothetical protein PRUPE_ppa017547mg [Prunus persica]
gene20906	LOC107429423	380.249	232.191	1140	273.824	234.462	109.508	0.00134392	-1.48650425010145	down	[E]	Amino acid transport and metabolism	--	--	--	Protein NRT1/ PTR FAMILY 3.1 GN=F24J5.19 OS=Arabidopsis thaliana (Mouse-ear cress) PE=2 SV=1	E	Amino acid transport and metabolism	PREDICTED: protein NRT1/ PTR FAMILY 3.1 [Prunus mume]
gene11022	LOC107418686	1.16042	1.67757	3.6081	0.983819	0.661195	0.693106	0.00310619	-1.48933843649103	down	--	--	--	--	--	Probable S-adenosylmethionine-dependent methyltransferase At5g38100 GN=At5g38100 OS=Arabidopsis thaliana (Mouse-ear cress) PE=2 SV=1	S	Function unknown	PREDICTED: probable S-adenosylmethionine-dependent methyltransferase At5g37990 [Prunus mume]
gene21334	LOC107429900	2.04106	1.94777	4.99215	0.428224	1.08784	1.68104	0.00463709	-1.48941984434113	down	[Z]	Cytoskeleton	Molecular Function: GTPase activity (GO:0003924);; Molecular Function: structural constituent of cytoskeleton (GO:0005200);; Molecular Function: GTP binding (GO:0005525);; Cellular Component: cytoplasm (GO:0005737);; Cellular Component: microtubule (GO:0005874);; Biological Process: GTP catabolic process (GO:0006184);; Biological Process: microtubule-based process (GO:0007017);; Biological Proces…	K07375|0|rcu:RCOM_1686680|tubulin beta chain, putative; K07375 tubulin beta (A)	Phagosome (ko04145)	Tubulin beta-4 chain GN=TUBB4 OS=Eleusine indica (Goosegrass) PE=2 SV=1	Z	Cytoskeleton	tubulin beta chain, putative [Ricinus communis]
gene5213	LOC107412304	22.7692	19.3258	72.008	17.5865	11.5317	11.6799	0.000445653	-1.49391731635009	down	[RTKL]	General function prediction only;; Signal transduction mechanisms;; Transcription;; Replication, recombination and repair	Molecular Function: protein serine/threonine kinase activity (GO:0004674);; Molecular Function: ATP binding (GO:0005524);; Biological Process: protein phosphorylation (GO:0006468);;	K08794|4.36797e-170|pxb:103934455|phosphoenolpyruvate carboxylase kinase 1-like; K08794 calcium/calmodulin-dependent protein kinase I [EC:2.7.11.17] (A)	--	Phosphoenolpyruvate carboxylase kinase 1 GN=PPCK1 OS=Arabidopsis thaliana (Mouse-ear cress) PE=1 SV=1	T	Signal transduction mechanisms	Phosphoenolpyruvate carboxylase kinase 1 [Morus notabilis]
gene13014	LOC107420860	5.63642	7.12007	12.0525	2.49095	2.94273	3.74328	1.07836e-05	-1.49798044501406	down	[R]	General function prediction only	--	K09527|0|pmum:103319855|TPR repeat-containing thioredoxin TTL1; K09527 DnaJ homolog subfamily C member 7 (A)	--	TPR repeat-containing thioredoxin TTL1 GN=TTL1 OS=Arabidopsis thaliana (Mouse-ear cress) PE=1 SV=1	R	General function prediction only	PREDICTED: TPR repeat-containing thioredoxin TTL1 [Prunus mume]
gene7736	LOC107415112	33.7318	69.9046	92.8622	24.6893	16.8997	26.9772	1.47798e-05	-1.49948165238854	down	--	--	--	--	--	Dirigent protein 19 (Precursor) GN=DIR19 OS=Arabidopsis thaliana (Mouse-ear cress) PE=2 SV=1	R	General function prediction only	PREDICTED: dirigent protein 22-like [Pyrus x bretschneideri]
gene11393	LOC107419096	11.581	18.8044	47.4663	7.70195	10.0141	9.91154	0.000241071	-1.50196253197588	down	[Q]	Secondary metabolites biosynthesis, transport and catabolism	Molecular Function: iron ion binding (GO:0005506);; Molecular Function: electron carrier activity (GO:0009055);; Biological Process: anthocyanin-containing compound biosynthetic process (GO:0009718);; Biological Process: response to sucrose (GO:0009744);; Biological Process: response to UV-B (GO:0010224);; Molecular Function: flavonoid 3'-monooxygenase activity (GO:0016711);; Molecular Function: …	K05280|0|pmum:103338591|flavonoid 3'-monooxygenase; K05280 flavonoid 3'-monooxygenase [EC:1.14.13.21] (A)	Flavonoid biosynthesis (ko00941);; Flavone and flavonol biosynthesis (ko00944)	Flavonoid 3&apos;-monooxygenase GN=CYP75B2 OS=Petunia hybrida (Petunia) PE=2 SV=1	Q	Secondary metabolites biosynthesis, transport and catabolism	PREDICTED: flavonoid 3&apos;-monooxygenase [Prunus mume]
gene5696	LOC107412857	6.43815	17.208	43.4463	9.36759	4.43061	9.7285	0.0131155	-1.50567123848485	down	--	--	--	--	--	Sigma factor binding protein 1, chloroplastic (Precursor) GN=SIB1 OS=Arabidopsis thaliana (Mouse-ear cress) PE=1 SV=1	S	Function unknown	protein with unknown function [Ricinus communis]
gene27555	LOC107403967	1.0128	3.0492	8.4028	1.56843	1.29361	1.54561	0.00604176	-1.51007615538393	down	[G]	Carbohydrate transport and metabolism	Biological Process: carbohydrate metabolic process (GO:0005975);; Molecular Function: carbohydrate binding (GO:0030246);; Molecular Function: maltose alpha-glucosidase activity (GO:0032450);;	--	--	Putative alpha-xylosidase 2 (Precursor) GN=XYL2 OS=Arabidopsis thaliana (Mouse-ear cress) PE=5 SV=1	G	Carbohydrate transport and metabolism	PREDICTED: putative alpha-xylosidase 2 [Prunus mume]
gene23514	LOC107432247	6.24727	27.0905	45.5363	6.40133	8.38785	12.9806	0.00325927	-1.51009768970128	down	[IQR]	Lipid transport and metabolism;; Secondary metabolites biosynthesis, transport and catabolism;; General function prediction only	Molecular Function: androstan-3-alpha,17-beta-diol dehydrogenase activity (GO:0047044);; Biological Process: oxidation-reduction process (GO:0055114);;	--	--	Secoisolariciresinol dehydrogenase (Fragment) OS=Podophyllum peltatum (Mayapple) PE=1 SV=1	Q	Secondary metabolites biosynthesis, transport and catabolism	PREDICTED: secoisolariciresinol dehydrogenase-like isoform X1 [Sesamum indicum]
gene17769	LOC107426008	313.644	295.796	603.181	124.421	156.743	142.083	1.73173e-08	-1.51031310948855	down	[R]	General function prediction only	Biological Process: biosynthetic process (GO:0009058);; Molecular Function: isomerase activity (GO:0016853);;	--	--	--	R	General function prediction only	hypothetical protein CICLE_v10021404mg [Citrus clementina]
jujube_newGene_2100	--	2.78844	3.01523	3.7159	1.0015	1.66793	0.687573	0.00371706	-1.51371568428012	down	--	--	--	--	--	--	--	--	ceramide glucosyltransferase, putative [Ricinus communis]
gene361	LOC107411165	30.1958	50.9498	160.518	26.7374	22.7648	33.5264	0.00090805	-1.51503219955865	down	--	--	Molecular Function: DNA binding (GO:0003677);; Molecular Function: sequence-specific DNA binding transcription factor activity (GO:0003700);; Cellular Component: nucleus (GO:0005634);; Biological Process: regulation of transcription, DNA-templated (GO:0006355);;	--	--	Pathogenesis-related genes transcriptional activator PTI5 GN=PTI5 OS=Solanum lycopersicum (Tomato) PE=2 SV=1	K	Transcription	hypothetical protein PRUPE_ppa012014mg [Prunus persica]
gene5327	LOC107412465	8.55189	8.99786	8.47735	2.29433	3.35978	2.82034	9.98341e-08	-1.51776770437044	down	[V]	Defense mechanisms	Molecular Function: ATP binding (GO:0005524);; Biological Process: ATP catabolic process (GO:0006200);; Cellular Component: plasmodesma (GO:0009506);; Biological Process: response to salt stress (GO:0009651);; Cellular Component: membrane (GO:0016020);; Molecular Function: ATPase activity, coupled to transmembrane movement of substances (GO:0042626);; Biological Process: cutin transport (GO:00800…	--	--	ABC transporter G family member 15 GN=MSA6.13 OS=Arabidopsis thaliana (Mouse-ear cress) PE=2 SV=2	V	Defense mechanisms	ABC transporter G family member 15 [Morus notabilis]
gene20157	LOC107428620	16.0793	35.1743	12.4954	1.27865	5.80184	15.5814	0.0196771	-1.5214910669128	down	--	--	--	K08235|7.45858e-125|pper:PRUPE_ppa009090mg|hypothetical protein; K08235 xyloglucan:xyloglucosyl transferase [EC:2.4.1.207] (A)	--	Probable xyloglucan endotransglucosylase/hydrolase protein 33 (Precursor) GN=XTH33 OS=Arabidopsis thaliana (Mouse-ear cress) PE=2 SV=2	G	Carbohydrate transport and metabolism	putative xyloglucan endotransglucosylase/hydrolase protein 33 [Morus notabilis]
gene17677	LOC107425924	2.35536	5.86962	9.87598	1.92194	1.88863	2.5045	0.00017771	-1.52302142546047	down	[P]	Inorganic ion transport and metabolism	--	K01537|0|vvi:100259561|calcium-transporting ATPase 12, plasma membrane-type; K01537 Ca2+-transporting ATPase [EC:3.6.3.8] (A)	--	Calcium-transporting ATPase 12, plasma membrane-type GN=ACA12 OS=Arabidopsis thaliana (Mouse-ear cress) PE=2 SV=1	P	Inorganic ion transport and metabolism	PREDICTED: calcium-transporting ATPase 12, plasma membrane-type [Vitis vinifera]
gene14635	LOC107422705	16.7238	61.8281	76.2249	17.6217	19.2721	18.0228	0.000509803	-1.52381756484627	down	[G]	Carbohydrate transport and metabolism	Cellular Component: chloroplast (GO:0009507);;	--	--	--	G	Carbohydrate transport and metabolism	hypothetical protein POPTR_0002s14190g [Populus trichocarpa]
gene1168	LOC107419951	3.21132	3.00071	2.79192	1.01042	1.37679	0.771296	0.0003931	-1.52409977340935	down	--	--	--	--	--	--	S	Function unknown	Sequence-specific DNA binding transcription factors, putative [Theobroma cacao]
gene11728	LOC107419456	0.562147	0.514635	1.39458	0.435282	0.315469	0.0984116	0.00580972	-1.5255032254439	down	[S]	Function unknown	--	--	--	Receptor-like protein 12 (Precursor) GN=RLP12 OS=Arabidopsis thaliana (Mouse-ear cress) PE=2 SV=2	R	General function prediction only	PREDICTED: receptor-like protein 12 [Prunus mume]
jujube_newGene_1056	--	10.0609	9.20588	31.048	5.96576	6.04196	5.22882	0.00151014	-1.52740824521058	down	--	--	--	--	--	--	--	--	NB-ARC domain-containing disease resistance protein, putative [Theobroma cacao]
gene635	LOC107413371	16.234	27.1032	105.043	16.5381	20.803	14.3318	0.00222246	-1.53016021569188	down	[Q]	Secondary metabolites biosynthesis, transport and catabolism	Molecular Function: monooxygenase activity (GO:0004497);; Molecular Function: iron ion binding (GO:0005506);; Molecular Function: electron carrier activity (GO:0009055);; Molecular Function: oxidoreductase activity, acting on paired donors, with incorporation or reduction of molecular oxygen (GO:0016705);; Molecular Function: heme binding (GO:0020037);; Biological Process: oxidation-reduction pro…	K09832|0|pper:PRUPEppa1027202mg|hypothetical protein; K09832 cytochrome P450, family 710, subfamily A (A)	Steroid biosynthesis (ko00100)	Cytochrome P450 710A1 GN=CYP710A1 OS=Arabidopsis thaliana (Mouse-ear cress) PE=1 SV=1	Q	Secondary metabolites biosynthesis, transport and catabolism	Cytochrome P450 710A1 [Morus notabilis]
gene17264	LOC107425482	1.02469	0.941006	1.56408	0.202829	0.30314	0.774296	0.00611555	-1.53127129119302	down	--	--	Molecular Function: transferase activity (GO:0016740);;	--	--	Putative UDP-glucose flavonoid 3-O-glucosyltransferase 3 {ECO:0000250|UniProtKB:Q2V6K0} OS=Fragaria ananassa (Strawberry) PE=2 SV=1	S	Function unknown	PREDICTED: putative UDP-glucose flavonoid 3-O-glucosyltransferase 3 [Prunus mume]
gene14586	LOC107422597	0.5874	2.52102	2.63512	0.605134	0.416699	0.991482	0.00482808	-1.53267737421267	down	--	--	--	--	--	Receptor-like protein 12 (Precursor) GN=RLP12 OS=Arabidopsis thaliana (Mouse-ear cress) PE=2 SV=2	R	General function prediction only	PREDICTED: receptor-like protein 12 [Vitis vinifera]
gene25260	LOC107434204	10.1522	15.3445	42.8875	5.91573	6.85514	8.12689	0.000648253	-1.5334868053649	down	[C]	Energy production and conversion	Molecular Function: iron ion binding (GO:0005506);; Cellular Component: mitochondrial intermembrane space (GO:0005758);; Molecular Function: electron carrier activity (GO:0009055);; Molecular Function: heme binding (GO:0020037);; Biological Process: electron transport chain (GO:0022900);; Cellular Component: respiratory chain (GO:0070469);;	K08738|1.4016e-73|sly:101264887|cytochrome c; K08738 cytochrome c (A)	Sulfur metabolism (ko00920)	Cytochrome c OS=Abutilon theophrasti (Velvet-leaf) PE=1 SV=1	C	Energy production and conversion	PREDICTED: cytochrome c [Nicotiana sylvestris]
gene28386	LOC107404878	6.64562	10.6204	26.1097	5.21949	3.59397	5.99888	0.000244938	-1.53597543357908	down	[E]	Amino acid transport and metabolism	Biological Process: amino acid transmembrane transport (GO:0003333);; Molecular Function: amino acid transmembrane transporter activity (GO:0015171);; Cellular Component: integral component of membrane (GO:0016021);;	--	--	Amino-acid permease BAT1 homolog GN=OsJ_02547 OS=Oryza sativa subsp. japonica (Rice) PE=2 SV=1	E	Amino acid transport and metabolism	hypothetical protein PRUPE_ppa004166mg [Prunus persica]
gene32558	LOC107409386	2.2485	3.69478	10.4517	1.68104	1.83613	2.14958	0.00116125	-1.53827994082929	down	[RTKL]	General function prediction only;; Signal transduction mechanisms;; Transcription;; Replication, recombination and repair	Molecular Function: protein serine/threonine kinase activity (GO:0004674);; Molecular Function: ATP binding (GO:0005524);; Cellular Component: plasma membrane (GO:0005886);; Biological Process: protein phosphorylation (GO:0006468);;	--	--	Receptor like protein kinase S.2 GN=F24L7.6 OS=Arabidopsis thaliana (Mouse-ear cress) PE=2 SV=2	T	Signal transduction mechanisms	hypothetical protein PRUPE_ppa001427mg [Prunus persica]
gene28875	LOC107405403	2.14069	3.46013	3.04836	0.822565	0.664925	1.1597	0.000965155	-1.53839014268123	down	[F]	Nucleotide transport and metabolism	Biological Process: 'de novo' IMP biosynthetic process (GO:0006189);; Molecular Function: formyltetrahydrofolate deformylase activity (GO:0008864);; Molecular Function: hydroxymethyl-, formyl- and related transferase activity (GO:0016742);;	K01433|0|pper:PRUPE_ppa008574mg|hypothetical protein; K01433 formyltetrahydrofolate deformylase [EC:3.5.1.10] (A)	Glyoxylate and dicarboxylate metabolism (ko00630);; One carbon pool by folate (ko00670)	Formyltetrahydrofolate deformylase 2, mitochondrial (Precursor) GN=PURU2 OS=Arabidopsis thaliana (Mouse-ear cress) PE=1 SV=1	G	Carbohydrate transport and metabolism	hypothetical protein PRUPE_ppa008574mg [Prunus persica]
gene13230	LOC107421098	0.735007	1.99787	3.35816	0.601325	0.619151	0.857638	0.00188616	-1.53860084624058	down	--	--	--	--	--	--	S	Function unknown	PREDICTED: uncharacterized protein LOC103319804 [Prunus mume]
gene499	LOC107412216	0.590057	1.59651	5.20955	0.988011	1.11623	0.466547	0.0229745	-1.53916888486192	down	[G]	Carbohydrate transport and metabolism	Molecular Function: transporter activity (GO:0005215);; Biological Process: transport (GO:0006810);; Cellular Component: integral component of membrane (GO:0016021);;	K09874|1.75384e-151|pop:POPTR_0011s06770g|POPTRDRAFT_235172; hypothetical protein; K09874 aquaporin NIP (A)	--	Aquaporin NIP1-2, N-terminally processed GN=F13C5.80 OS=Arabidopsis thaliana (Mouse-ear cress) PE=2 SV=2	G	Carbohydrate transport and metabolism	PREDICTED: aquaporin NIP1-2-like [Populus euphratica]
gene13096	LOC107420946	8.87034	14.5296	24.7795	6.56756	2.85441	5.14437	0.00012803	-1.54002729118087	down	[P]	Inorganic ion transport and metabolism	Molecular Function: secondary active sulfate transmembrane transporter activity (GO:0008271);; Biological Process: sulfate transport (GO:0008272);; Cellular Component: integral component of membrane (GO:0016021);; Biological Process: transmembrane transport (GO:0055085);;	K17470|0|mdm:103401023|sulfate transporter 1.2-like; K17470 sulfate transporter 1, high-affinity (A)	--	Sulfate transporter 1.3 GN=SULTR1;3 OS=Arabidopsis thaliana (Mouse-ear cress) PE=2 SV=1	P	Inorganic ion transport and metabolism	PREDICTED: sulfate transporter 1.2-like [Malus domestica]
gene2096	LOC107430134	1.18615	3.94917	3.76843	1.08373	0.670619	1.31052	0.00335186	-1.54050789726111	down	--	--	--	--	--	--	R	General function prediction only	hypothetical protein L484_026102 [Morus notabilis]
gene21029	LOC107429566	2.44647	10.5323	11.1277	0.725714	2.15638	5.31353	0.0217425	-1.54280812221833	down	[F]	Nucleotide transport and metabolism	--	K03574|2.78731e-63|fve:101310598|nudix hydrolase 1-like; K03574 8-oxo-dGTP diphosphatase [EC:3.6.1.55] (A)	--	Nudix hydrolase 1 GN=F14K14.13 OS=Arabidopsis thaliana (Mouse-ear cress) PE=1 SV=1	L	Replication, recombination and repair	PREDICTED: nudix hydrolase 1-like [Fragaria vesca subsp. vesca]
gene1380	LOC107421688	0.278256	1.12283	2.26024	0.431023	0.416096	0.495196	0.00832405	-1.54492415845755	down	[RTKL]	General function prediction only;; Signal transduction mechanisms;; Transcription;; Replication, recombination and repair	--	--	--	G-type lectin S-receptor-like serine/threonine-protein kinase At1g61500 (Precursor) GN=At1g61500 OS=Arabidopsis thaliana (Mouse-ear cress) PE=2 SV=2	T	Signal transduction mechanisms	PREDICTED: G-type lectin S-receptor-like serine/threonine-protein kinase SD1-29 [Prunus mume]
gene20888	LOC107429403	1.96976	2.24393	3.87692	0.829879	0.750685	1.2886	0.000193135	-1.54590225881366	down	[V]	Defense mechanisms	Biological Process: drug transmembrane transport (GO:0006855);; Molecular Function: drug transmembrane transporter activity (GO:0015238);; Molecular Function: antiporter activity (GO:0015297);; Cellular Component: membrane (GO:0016020);;	K03327|0|pmum:103341551|MATE efflux family protein 5-like; K03327 multidrug resistance protein, MATE family (A)	--	MATE efflux family protein 9 GN=F3L12.7 OS=Arabidopsis thaliana (Mouse-ear cress) PE=2 SV=1	S	Function unknown	PREDICTED: MATE efflux family protein 5-like [Prunus mume]
gene3280	LOC107410268	0.186522	1.05635	1.26632	0.238573	0.12142	0.517232	0.0212471	-1.54716378021242	down	[RTKL]	General function prediction only;; Signal transduction mechanisms;; Transcription;; Replication, recombination and repair	Biological Process: cellular process (GO:0009987);; Molecular Function: kinase activity (GO:0016301);;	--	--	Putative receptor protein kinase ZmPK1 (Precursor) GN=PK1 OS=Zea mays (Maize) PE=2 SV=2	T	Signal transduction mechanisms	Putative receptor protein kinase ZmPK1 [Morus notabilis]
gene2564	LOC107434872	0.517647	0.842495	3.09587	0.0711667	0.825482	0.61341	0.0391671	-1.54865268448921	down	[O]	Posttranslational modification, protein turnover, chaperones	Molecular Function: serine-type endopeptidase activity (GO:0004252);; Cellular Component: extracellular region (GO:0005576);; Biological Process: proteolysis (GO:0006508);; Molecular Function: identical protein binding (GO:0042802);; Biological Process: negative regulation of catalytic activity (GO:0043086);;	--	--	Subtilisin-like protease (Precursor) GN=At5g67360 OS=Arabidopsis thaliana (Mouse-ear cress) PE=1 SV=1	O	Posttranslational modification, protein turnover, chaperones	PREDICTED: subtilisin-like protease-like [Fragaria vesca subsp. vesca]
gene16508	LOC107424649	1.27093	2.05566	3.9136	0.457628	1.22899	0.821333	0.00197106	-1.55140032005846	down	[O]	Posttranslational modification, protein turnover, chaperones	Molecular Function: ATP binding (GO:0005524);; Biological Process: proteolysis (GO:0006508);; Molecular Function: peptidase activity (GO:0008233);; Molecular Function: nucleoside-triphosphatase activity (GO:0017111);; Biological Process: cell division (GO:0051301);;	--	--	ATP-dependent zinc metalloprotease FTSH 2, chloroplastic (Precursor) OS=Oryza sativa subsp. japonica (Rice) PE=3 SV=1	O	Posttranslational modification, protein turnover, chaperones	putative mitochondrial chaperone BCS1-B [Morus notabilis]
gene11283	LOC107419004	179.079	306.295	474.349	124.42	109.41	94.1775	1.31741e-07	-1.55197206209018	down	[C]	Energy production and conversion	Molecular Function: ATP citrate synthase activity (GO:0003878);; Molecular Function: succinate-CoA ligase (ADP-forming) activity (GO:0004775);; Cellular Component: cytosol (GO:0005829);; Cellular Component: plasma membrane (GO:0005886);; Cellular Component: citrate lyase complex (GO:0009346);; Biological Process: cellular carbohydrate metabolic process (GO:0044262);;	K01648|0|tcc:TCM_021371|ATP citrate lyase subunit B 2 isoform 1; K01648 ATP citrate (pro-S)-lyase [EC:2.3.3.8] (A)	Citrate cycle (TCA cycle) (ko00020)	ATP-citrate synthase beta chain protein 1 OS=Oryza sativa subsp. japonica (Rice) PE=2 SV=1	C	Energy production and conversion	hypothetical protein JCGZ_18992 [Jatropha curcas]
gene20698	LOC107429201	2.46432	16.6806	15.5305	3.92388	3.09286	4.69947	0.00501778	-1.55690761801664	down	[RTKL]	General function prediction only;; Signal transduction mechanisms;; Transcription;; Replication, recombination and repair	Biological Process: MAPK cascade (GO:0000165);; Molecular Function: protein serine/threonine kinase activity (GO:0004674);; Molecular Function: protein tyrosine kinase activity (GO:0004713);; Molecular Function: ATP binding (GO:0005524);; Biological Process: regulation of transcription, DNA-templated (GO:0006355);; Biological Process: protein phosphorylation (GO:0006468);; Biological Process: pro…	--	--	G-type lectin S-receptor-like serine/threonine-protein kinase RLK1 (Precursor) GN=RLK1 OS=Arabidopsis thaliana (Mouse-ear cress) PE=2 SV=2	T	Signal transduction mechanisms	G-type lectin S-receptor-like serine/threonine-protein kinase RLK1 [Morus notabilis]
gene7348	LOC107414674	8.997	19.0971	35.5632	6.82493	4.60169	10.3656	0.000365577	-1.55747866150883	down	--	--	Biological Process: response to stimulus (GO:0050896);;	--	--	Probable membrane-associated kinase regulator 5 GN=MAKR5 OS=Arabidopsis thaliana (Mouse-ear cress) PE=2 SV=1	S	Function unknown	hypothetical protein JCGZ_26033 [Jatropha curcas]
gene13507	LOC107421406	6.22231	11.5942	32.2366	6.20265	5.19728	6.52625	0.000965509	-1.55755756541359	down	[GC]	Carbohydrate transport and metabolism;; Energy production and conversion	--	--	--	Cyanidin-3-O-glucoside 2-O-glucuronosyltransferase GN=UGAT OS=Bellis perennis (Daisy) PE=1 SV=1	CG	Energy production and conversion;; Carbohydrate transport and metabolism	PREDICTED: crocetin glucoside glucosyltransferase-like [Vitis vinifera]
gene15796	LOC107423910	10.8907	7.26942	42.7098	9.2246	7.03266	4.25871	0.00350532	-1.56143655196498	down	--	--	--	--	--	Protein LURP-one-related 6 GN=At2g05910 OS=Arabidopsis thaliana (Mouse-ear cress) PE=2 SV=1	S	Function unknown	hypothetical protein F383_25520 [Gossypium arboreum]
gene1248	LOC107419886	5.68635	11.8185	22.2069	3.60362	5.54754	4.43468	0.000723475	-1.56189328496842	down	[O]	Posttranslational modification, protein turnover, chaperones	--	K13993|1.02007e-74|pvu:PHAVU_006G150600g|hypothetical protein; K13993 HSP20 family protein (A)	Protein processing in endoplasmic reticulum (ko04141)	15.4 kDa class V heat shock protein GN=HSP15.4 OS=Arabidopsis thaliana (Mouse-ear cress) PE=2 SV=1	O	Posttranslational modification, protein turnover, chaperones	hypothetical protein L484_012864 [Morus notabilis]
gene262	LOC107434396	1.26098	1.96077	2.92727	0.161857	0.738057	1.29645	0.010244	-1.57022640308326	down	--	--	--	--	--	Protein YLS3 (Precursor) GN=YLS3 OS=Arabidopsis thaliana (Mouse-ear cress) PE=2 SV=1	R	General function prediction only	PREDICTED: protein YLS3-like [Malus domestica]
gene6152	LOC107413367	3.20635	2.46796	5.17881	1.79115	0.733004	1.16485	0.000250108	-1.57078698200747	down	--	--	--	--	--	--	R	General function prediction only	putative transporter MCH1 [Morus notabilis]
gene27399	LOC107403800	0.620393	1.78491	4.06043	0.809751	0.57645	0.77983	0.00435176	-1.57642519925925	down	[O]	Posttranslational modification, protein turnover, chaperones	Molecular Function: serine-type endopeptidase activity (GO:0004252);; Biological Process: proteolysis (GO:0006508);; Molecular Function: identical protein binding (GO:0042802);; Biological Process: negative regulation of catalytic activity (GO:0043086);;	--	--	Subtilisin-like protease SBT3.3 {ECO:0000303|PubMed:16193095} (Precursor) OS=Arabidopsis thaliana (Mouse-ear cress) PE=2 SV=1	O	Posttranslational modification, protein turnover, chaperones	PREDICTED: subtilisin-like protease-like [Fragaria vesca subsp. vesca]
gene1443	LOC107422465	14.4748	36.8123	115.824	21.0033	14.1439	20.9816	0.00268551	-1.57869315754286	down	--	--	--	--	--	Uncharacterized protein At1g76070 GN=At1g76070 OS=Arabidopsis thaliana (Mouse-ear cress) PE=1 SV=1	S	Function unknown	Uncharacterized protein TCM_034301 [Theobroma cacao]
gene14645	LOC107422681	12.6678	17.6353	42.2149	9.71879	4.67213	10.8432	0.000366557	-1.58003214903328	down	[GC]	Carbohydrate transport and metabolism;; Energy production and conversion	Biological Process: xenobiotic metabolic process (GO:0006805);; Molecular Function: UDP-glucosyltransferase activity (GO:0035251);;	K08237|0|tcc:TCM_005182|UDP-Glycosyltransferase superfamily protein; K08237 hydroquinone glucosyltransferase [EC:2.4.1.218] (A)	--	Hydroquinone glucosyltransferase GN=AS OS=Rauvolfia serpentina (Serpentine wood) PE=1 SV=1	CG	Energy production and conversion;; Carbohydrate transport and metabolism	hypothetical protein JCGZ_14282 [Jatropha curcas]
gene13489	LOC107421380	0.958272	1.98619	3.76863	0.53211	1.05643	0.737985	0.0032742	-1.58061500023955	down	[I]	Lipid transport and metabolism	Molecular Function: C-4 methylsterol oxidase activity (GO:0000254);; Molecular Function: iron ion binding (GO:0005506);; Biological Process: fatty acid biosynthetic process (GO:0006633);; Cellular Component: integral component of membrane (GO:0016021);; Biological Process: oxidation-reduction process (GO:0055114);;	K04713|2.63223e-169|pmum:103336183|sphinganine C(4)-monooxygenase 1-like; K04713 sphinganine C4-monooxygenase [EC:1.14.13.169] (A)	Sphingolipid metabolism (ko00600)	Sphinganine C(4)-monooxygenase 2 GN=SBH2 OS=Arabidopsis thaliana (Mouse-ear cress) PE=1 SV=1	I	Lipid transport and metabolism	PREDICTED: sphinganine C(4)-monooxygenase 1-like [Prunus mume]
gene1406	LOC107422172	14.0753	21.6306	63.1517	9.36977	8.51474	12.6898	5.59788e-05	-1.58261692508218	down	[C]	Energy production and conversion	Molecular Function: NADH dehydrogenase (ubiquinone) activity (GO:0008137);; Molecular Function: flavin adenine dinucleotide binding (GO:0050660);; Biological Process: oxidation-reduction process (GO:0055114);;	K17871|0|pper:PRUPE_ppa003771mg|hypothetical protein; K17871 NADH:ubiquinone reductase (non-electrogenic) [EC:1.6.5.9] (A)	--	Internal alternative NAD(P)H-ubiquinone oxidoreductase A2, mitochondrial (Precursor) GN=NDA2 OS=Arabidopsis thaliana (Mouse-ear cress) PE=2 SV=1	C	Energy production and conversion	hypothetical protein PRUPE_ppa003771mg [Prunus persica]
gene12592	LOC107420382	2.75649	4.44586	4.45514	0.967701	1.80767	1.13554	0.000339822	-1.5840510204485	down	--	--	--	K14488|5.34798e-86|csv:101230000|auxin-induced protein 6B-like; K14488 SAUR family protein (A)	Plant hormone signal transduction (ko04075)	Auxin-induced protein 6B OS=Glycine max (Soybean) PE=2 SV=1	S	Function unknown	PREDICTED: auxin-induced protein 6B-like [Cucumis sativus]
gene13067	LOC107420887	3.73716	10.3663	20.0367	3.91793	1.98622	5.4344	0.00200023	-1.59733166447347	down	[R]	General function prediction only	Molecular Function: phospholipase A2 activity (GO:0004623);; Biological Process: lipid metabolic process (GO:0006629);; Molecular Function: galactolipase activity (GO:0047714);;	--	--	Patatin-like protein 2 GN=PLP2 OS=Arabidopsis thaliana (Mouse-ear cress) PE=1 SV=1	I	Lipid transport and metabolism	Patatin group A-3 [Morus notabilis]
gene36	LOC107408736	16.9434	29.5459	51.754	11.3926	11.0809	9.99334	3.61919e-06	-1.59997187077886	down	[O]	Posttranslational modification, protein turnover, chaperones	Molecular Function: ATP binding (GO:0005524);; Cellular Component: plasma membrane (GO:0005886);; Biological Process: toxin catabolic process (GO:0009407);; Biological Process: response to cyclopentenone (GO:0010583);; Molecular Function: ATPase activity (GO:0016887);;	--	--	ATP-dependent zinc metalloprotease FTSH 4, mitochondrial (Precursor) GN=FTSH4 OS=Arabidopsis thaliana (Mouse-ear cress) PE=1 SV=2	O	Posttranslational modification, protein turnover, chaperones	hypothetical protein CARUB_v10027577mg [Capsella rubella]
jujube_newGene_118	--	2.05545	5.79274	9.72767	1.48097	1.98818	2.27953	0.00331875	-1.60697925869532	down	--	--	Biological Process: response to stress (GO:0006950);;	--	--	--	R	General function prediction only	conserved hypothetical protein [Ricinus communis]
gene26208	LOC107435244	71.8152	112.865	223.498	45.6548	32.8328	50.6397	2.86659e-06	-1.61109667098969	down	--	--	Biological Process: response to stress (GO:0006950);; Biological Process: response to jasmonic acid (GO:0009753);; Biological Process: hormone-mediated signaling pathway (GO:0009755);; Biological Process: cellular response to oxygen-containing compound (GO:1901701);;	K13464|1.55652e-73|pper:PRUPE_ppa011173mg|hypothetical protein; K13464 jasmonate ZIM domain-containing protein (A)	Plant hormone signal transduction (ko04075)	Protein TIFY 9 GN=T31B5.40 OS=Arabidopsis thaliana (Mouse-ear cress) PE=1 SV=1	K	Transcription	hypothetical protein PRUPE_ppa011173mg [Prunus persica]
gene16110	LOC107424275	1.96273	2.26647	2.36793	1.11847	0.450223	0.632643	0.000194048	-1.61407937851042	down	[I]	Lipid transport and metabolism	Molecular Function: hydroxymethylglutaryl-CoA reductase (NADPH) activity (GO:0004420);; Cellular Component: endoplasmic reticulum membrane (GO:0005789);; Biological Process: isoprenoid biosynthetic process (GO:0008299);; Biological Process: coenzyme A metabolic process (GO:0015936);; Cellular Component: integral component of membrane (GO:0016021);; Molecular Function: NADP binding (GO:0050661);; …	K00021|0|sot:102599791|hmg1; 3-hydroxy-3-methylglutaryl-coenzyme A reductase 1-like; K00021 hydroxymethylglutaryl-CoA reductase (NADPH) [EC:1.1.1.34] (A)	Terpenoid backbone biosynthesis (ko00900)	3-hydroxy-3-methylglutaryl-coenzyme A reductase 1 GN=HMG1 OS=Solanum tuberosum (Potato) PE=2 SV=1	I	Lipid transport and metabolism	3-hydroxy-3-methylglutaryl coenzyme A reductase [Camellia sinensis]
gene999	LOC107417963	21.8412	57.8326	117.436	21.0618	22.0396	26.7626	0.00039491	-1.61477427883767	down	--	--	--	--	--	Fatty acid 2-hydroxylase 1 GN=FAH1 OS=Arabidopsis thaliana (Mouse-ear cress) PE=1 SV=1	I	Lipid transport and metabolism	unnamed protein product [Coffea canephora]
gene8280	LOC107415676	26.4022	33.5274	108.488	20.2788	19.1496	15.464	0.000310932	-1.61613199003763	down	--	--	--	--	--	--	S	Function unknown	hypothetical protein CICLE_v10022922mg [Citrus clementina]
gene966	LOC107417264	3.41748	5.52716	4.02824	1.12107	1.24055	1.89492	4.53184e-05	-1.61681713942725	down	--	--	Biological Process: amino acid transport (GO:0006865);; Cellular Component: integral component of membrane (GO:0016021);;	--	--	Probable amino acid permease 7 GN=AAP7 OS=Arabidopsis thaliana (Mouse-ear cress) PE=1 SV=1	E	Amino acid transport and metabolism	Amino acid permease, putative isoform 1 [Theobroma cacao]
jujube_newGene_3275	--	9.93957	21.9641	54.0878	8.19016	6.88021	12.5079	0.000838963	-1.61946041159549	down	[I]	Lipid transport and metabolism	Molecular Function: iron ion binding (GO:0005506);; Biological Process: fatty acid biosynthetic process (GO:0006633);; Cellular Component: integral component of membrane (GO:0016021);; Molecular Function: oxidoreductase activity (GO:0016491);; Biological Process: oxidation-reduction process (GO:0055114);;	--	--	Fatty acid 2-hydroxylase 1 GN=FAH1 OS=Arabidopsis thaliana (Mouse-ear cress) PE=1 SV=1	I	Lipid transport and metabolism	hypothetical protein L484_025978 [Morus notabilis]
gene15022	LOC107423147	16.4958	30.3452	80.8928	19.7121	9.7868	12.0986	0.000698816	-1.62881019063159	down	--	--	Biological Process: lipid transport (GO:0006869);; Molecular Function: lipid binding (GO:0008289);;	--	--	Non-specific lipid-transfer protein-like protein At2g13820 (Precursor) GN=At2g13820 OS=Arabidopsis thaliana (Mouse-ear cress) PE=1 SV=1	R	General function prediction only	PREDICTED: non-specific lipid-transfer protein-like protein At2g13820 [Malus domestica]
gene559	LOC107412897	1.19681	1.19291	2.95509	0.596454	0.473584	0.68609	0.00106748	-1.64186041318015	down	[G]	Carbohydrate transport and metabolism	Molecular Function: hydrolase activity, hydrolyzing O-glycosyl compounds (GO:0004553);; Cellular Component: cell wall (GO:0005618);; Biological Process: cellular glucan metabolic process (GO:0006073);; Molecular Function: xyloglucan:xyloglucosyl transferase activity (GO:0016762);; Cellular Component: apoplast (GO:0048046);;	K08235|1.35112e-142|fve:101307095|probable xyloglucan endotransglucosylase/hydrolase protein 16-like; K08235 xyloglucan:xyloglucosyl transferase [EC:2.4.1.207] (A)	--	Probable xyloglucan endotransglucosylase/hydrolase protein 15 (Precursor) OS=Arabidopsis thaliana (Mouse-ear cress) PE=1 SV=1	G	Carbohydrate transport and metabolism	PREDICTED: probable xyloglucan endotransglucosylase/hydrolase protein 16-like [Fragaria vesca subsp. vesca]
gene5506	LOC107412666	1.42986	1.74857	3.82979	0.547882	0.641398	1.07195	0.000358735	-1.64349081727047	down	--	--	--	--	--	Pentatricopeptide repeat-containing protein At5g59600 GN=PCMP-E1 OS=Arabidopsis thaliana (Mouse-ear cress) PE=2 SV=1	R	General function prediction only	PREDICTED: pentatricopeptide repeat-containing protein At5g59600 [Malus domestica]
gene21836	LOC107430440	15.8909	58.2338	80.7546	19.325	16.8847	12.9151	0.000149475	-1.64669484037849	down	--	--	Cellular Component: extracellular region (GO:0005576);;	--	--	Expansin-like B1 (Precursor) OS=Oryza sativa subsp. japonica (Rice) PE=2 SV=2	R	General function prediction only	PREDICTED: expansin-like B1-like [Fragaria vesca subsp. vesca]
gene23624	LOC107432387	3.63899	7.24677	20.5842	2.04303	4.23414	4.12713	0.0009567	-1.64910670934729	down	[R]	General function prediction only	Molecular Function: inward rectifier potassium channel activity (GO:0005242);; Cellular Component: plasma membrane (GO:0005886);; Biological Process: iron ion transport (GO:0006826);; Biological Process: cell adhesion (GO:0007155);; Biological Process: response to water deprivation (GO:0009414);; Biological Process: response to salt stress (GO:0009651);; Biological Process: meristem initiation (G…	--	--	Potassium channel AKT1 GN=AKT1 OS=Arabidopsis thaliana (Mouse-ear cress) PE=1 SV=2	P	Inorganic ion transport and metabolism	Potassium channel AKT1, putative [Ricinus communis]
gene3578	LOC107410583	9.42799	9.65571	21.6628	3.98118	4.5296	4.463	5.63322e-06	-1.64910826846791	down	--	--	Molecular Function: gamma-aminobutyric acid transmembrane transporter activity (GO:0015185);; Biological Process: gamma-aminobutyric acid transport (GO:0015812);; Cellular Component: integral component of membrane (GO:0016021);;	--	--	GABA transporter 1 GN=T23G18.9 OS=Arabidopsis thaliana (Mouse-ear cress) PE=1 SV=1	E	Amino acid transport and metabolism	Transmembrane amino acid transporter family protein isoform 1 [Theobroma cacao]
gene6879	LOC107414178	4.31358	8.84094	8.71618	1.23637	2.35794	3.31575	2.81462e-05	-1.65955844033729	down	[Q]	Secondary metabolites biosynthesis, transport and catabolism	Molecular Function: copper ion binding (GO:0005507);; Molecular Function: L-ascorbate oxidase activity (GO:0008447);; Cellular Component: plant-type cell wall (GO:0009505);; Cellular Component: membrane (GO:0016020);; Biological Process: oxidation-reduction process (GO:0055114);;	--	--	L-ascorbate oxidase homolog (Precursor) OS=Nicotiana tabacum (Common tobacco) PE=1 SV=1	Q	Secondary metabolites biosynthesis, transport and catabolism	hypothetical protein PRUPE_ppa003877mg [Prunus persica]
gene2579	LOC107434957	2.50095	10.0585	21.9807	4.98887	3.43798	2.6538	0.0110875	-1.66232523945919	down	--	--	--	--	--	GDSL esterase/lipase 3 (Precursor) GN=GLIP3 OS=Arabidopsis thaliana (Mouse-ear cress) PE=2 SV=2	I	Lipid transport and metabolism	PREDICTED: GDSL esterase/lipase 2-like [Prunus mume]
gene14527	LOC107422536	2.5211	11.8589	13.5158	3.64441	1.80922	3.76266	0.00249557	-1.66386393890525	down	--	--	--	--	--	F-box protein At2g02240 GN=At2g02240 OS=Arabidopsis thaliana (Mouse-ear cress) PE=2 SV=1	R	General function prediction only	F-box protein [Morus notabilis]
gene23184	LOC107431970	44.7769	97.22	313.477	37.1254	46.4935	57.8193	0.0006586	-1.67466575115745	down	--	--	--	--	--	--	P	Inorganic ion transport and metabolism	PREDICTED: heterogeneous nuclear ribonucleoprotein D-like [Glycine max]
gene17003	LOC107425217	14.676	22.7381	29	7.80281	5.41406	7.45477	2.03827e-08	-1.68167305093596	down	[V]	Defense mechanisms	Biological Process: drug transmembrane transport (GO:0006855);; Molecular Function: drug transmembrane transporter activity (GO:0015238);; Molecular Function: antiporter activity (GO:0015297);; Cellular Component: membrane (GO:0016020);;	K03327|0|mdm:103446099|protein TRANSPARENT TESTA 12-like; K03327 multidrug resistance protein, MATE family (A)	--	Protein TRANSPARENT TESTA 12 GN=F17J16_80 OS=Arabidopsis thaliana (Mouse-ear cress) PE=2 SV=1	S	Function unknown	hypothetical protein JCGZ_18675 [Jatropha curcas]
gene8645	LOC107416084	1.87503	5.32577	8.67515	1.37151	1.5608	1.99977	0.000497577	-1.68692494854038	down	[V]	Defense mechanisms	Biological Process: drug transmembrane transport (GO:0006855);; Molecular Function: drug transmembrane transporter activity (GO:0015238);; Molecular Function: antiporter activity (GO:0015297);; Cellular Component: membrane (GO:0016020);;	K03327|0|pmum:103328653|MATE efflux family protein 5; K03327 multidrug resistance protein, MATE family (A)	--	MATE efflux family protein 5 GN=F3L12.12 OS=Arabidopsis thaliana (Mouse-ear cress) PE=3 SV=1	V	Defense mechanisms	PREDICTED: MATE efflux family protein 5 [Prunus mume]
gene17675	LOC107425895	1.12782	6.07238	8.36837	2.08802	0.929336	1.72454	0.00661981	-1.68942235307571	down	[TZDR]	Signal transduction mechanisms;; Cytoskeleton;; Cell cycle control, cell division, chromosome partitioning;; General function prediction only	Molecular Function: calcium ion binding (GO:0005509);; Molecular Function: 2-alkenal reductase [NAD(P)] activity (GO:0032440);; Biological Process: oxidation-reduction process (GO:0055114);;	--	--	Calmodulin-3 OS=Oryza sativa subsp. japonica (Rice) PE=3 SV=1	T	Signal transduction mechanisms	PREDICTED: calmodulin-like protein 11 [Malus domestica]
gene19859	LOC107428282	13.1812	24.7413	53.5766	11.0294	9.80354	7.69673	7.11582e-05	-1.68952316983408	down	--	--	Molecular Function: sequence-specific DNA binding transcription factor activity (GO:0003700);; Biological Process: regulation of transcription, DNA-templated (GO:0006355);; Molecular Function: sequence-specific DNA binding (GO:0043565);;	--	--	Probable WRKY transcription factor 75 GN=WRKY75 OS=Arabidopsis thaliana (Mouse-ear cress) PE=2 SV=1	K	Transcription	PREDICTED: probable WRKY transcription factor 12-like [Fragaria vesca subsp. vesca]
gene4990	LOC107412088	0.405111	0.697908	2.76267	0.670362	0.182234	0.355528	0.0140292	-1.69841586009649	down	--	--	--	--	--	Protein BONZAI 3 GN=BON3 OS=Arabidopsis thaliana (Mouse-ear cress) PE=1 SV=1	T	Signal transduction mechanisms	PREDICTED: protein BONZAI 3-like isoform X2 [Malus domestica]
gene18791	LOC107427127	0.586393	3.51986	5.06321	0.581524	0.429483	1.83685	0.0123066	-1.69888987694317	down	[RTKL]	General function prediction only;; Signal transduction mechanisms;; Transcription;; Replication, recombination and repair	Molecular Function: nucleotide binding (GO:0000166);; Molecular Function: protein kinase activity (GO:0004672);; Biological Process: phosphorylation (GO:0016310);;	--	--	Probable L-type lectin-domain containing receptor kinase S.5 (Precursor) GN=LECRKS5 OS=Arabidopsis thaliana (Mouse-ear cress) PE=2 SV=1	T	Signal transduction mechanisms	hypothetical protein PRUPE_ppa019724mg [Prunus persica]
gene12943	LOC107420800	31.038	51.181	88.9853	15.9007	20.378	17.018	1.41887e-06	-1.70182574187859	down	--	--	Molecular Function: signal transducer activity (GO:0004871);; Cellular Component: heterotrimeric G-protein complex (GO:0005834);; Biological Process: G-protein coupled receptor signaling pathway (GO:0007186);;	--	--	Guanine nucleotide-binding protein subunit gamma 1 (Precursor) GN=MAA21.50 OS=Arabidopsis thaliana (Mouse-ear cress) PE=1 SV=1	S	Function unknown	PREDICTED: guanine nucleotide-binding protein subunit gamma 1-like [Prunus mume]
gene12386	LOC107420293	8.05762	10.932	23.1652	5.14995	4.95406	2.94229	2.26947e-05	-1.7019361632628	down	[MG]	Cell wall/membrane/envelope biogenesis;; Carbohydrate transport and metabolism	Molecular Function: nucleotide binding (GO:0000166);; Biological Process: anthocyanin-containing compound biosynthetic process (GO:0009718);; Biological Process: cellular metabolic process (GO:0044237);; Molecular Function: dihydrokaempferol 4-reductase activity (GO:0045552);; Molecular Function: flavanone 4-reductase activity (GO:0047890);; Molecular Function: coenzyme binding (GO:0050662);; Bio…	K13082|0|vvi:100233141|DFR, dfr1; dihydroflavonol reductase (EC:1.1.1.219); K13082 bifunctional dihydroflavonol 4-reductase/flavanone 4-reductase [EC:1.1.1.219 1.1.1.234] (A)	Flavonoid biosynthesis (ko00941)	Bifunctional dihydroflavonol 4-reductase/flavanone 4-reductase GN=DFR OS=Malus domestica (Apple) PE=1 SV=1	Q	Secondary metabolites biosynthesis, transport and catabolism	dihydroflavonol-4-reductase [Vitis rotundifolia]
gene8231	LOC107415688	5.01416	2.2752	17.5476	2.64012	1.86062	3.01728	0.00230818	-1.70270131929369	down	[E]	Amino acid transport and metabolism	Molecular Function: transporter activity (GO:0005215);; Biological Process: transport (GO:0006810);; Cellular Component: membrane (GO:0016020);;	K14638|0|pper:PRUPE_ppa003155mg|hypothetical protein; K14638 solute carrier family 15 (peptide/histidine transporter), member 3/4 (A)	--	Protein NRT1/ PTR FAMILY 2.10 GN=T17F15.170 OS=Arabidopsis thaliana (Mouse-ear cress) PE=1 SV=3	P	Inorganic ion transport and metabolism	hypothetical protein PRUPE_ppa003155mg [Prunus persica]
gene8063	LOC107415443	141.385	155.46	442.681	75.7812	70.8447	79.4576	1.276e-06	-1.70368200929553	down	[H]	Coenzyme transport and metabolism	--	K00278|0|pmum:103329859|L-aspartate oxidase, chloroplastic; K00278 L-aspartate oxidase [EC:1.4.3.16] (A)	Alanine, aspartate and glutamate metabolism (ko00250);; Nicotinate and nicotinamide metabolism (ko00760)	L-aspartate oxidase, chloroplastic (Precursor) GN=AO OS=Arabidopsis thaliana (Mouse-ear cress) PE=2 SV=1	H	Coenzyme transport and metabolism	PREDICTED: L-aspartate oxidase, chloroplastic [Prunus mume]
gene24237	LOC107433071	313.041	457.92	371.577	65.2902	137.002	151.183	6.72844e-09	-1.70460513091897	down	[G]	Carbohydrate transport and metabolism	Cellular Component: vacuole (GO:0005773);; Cellular Component: plasma membrane (GO:0005886);; Biological Process: glycolytic process (GO:0006096);; Biological Process: calcium ion transport (GO:0006816);; Biological Process: iron ion transport (GO:0006826);; Biological Process: water transport (GO:0006833);; Biological Process: hyperosmotic response (GO:0006972);; Biological Process: Golgi organi…	K09872|3.79551e-47|brp:103867220|aquaporin PIP2-2; K09872 aquaporin PIP (A)	--	Aquaporin PIP2-2, N-terminally processed GN=T2N18.7 OS=Arabidopsis thaliana (Mouse-ear cress) PE=1 SV=2	G	Carbohydrate transport and metabolism	BnaC03g72010D [Brassica napus]
gene7958	LOC107415452	10.2924	38.2487	40.7542	8.70335	6.0312	12.6659	7.69501e-05	-1.70728657823919	down	[O]	Posttranslational modification, protein turnover, chaperones	Molecular Function: ATP binding (GO:0005524);; Molecular Function: nucleoside-triphosphatase activity (GO:0017111);;	--	--	--	O	Posttranslational modification, protein turnover, chaperones	putative mitochondrial chaperone BCS1-B [Morus notabilis]
gene8681	LOC107416122	1.54735	2.12507	2.45036	0.416167	0.781465	0.674778	9.42424e-05	-1.71089203554288	down	[I]	Lipid transport and metabolism	Molecular Function: 3-hydroxyisobutyryl-CoA hydrolase activity (GO:0003860);; Molecular Function: enoyl-CoA hydratase activity (GO:0004300);; Biological Process: fatty acid beta-oxidation (GO:0006635);; Biological Process: response to karrikin (GO:0080167);;	K05605|0|pop:POPTR_0002s05880g|POPTRDRAFT_551227; enoyl-CoA hydratase/isomerase family protein; K05605 3-hydroxyisobutyryl-CoA hydrolase [EC:3.1.2.4] (A)	Valine, leucine and isoleucine degradation (ko00280);; beta-Alanine metabolism (ko00410);; Propanoate metabolism (ko00640);; Carbon metabolism (ko01200)	3-hydroxyisobutyryl-CoA hydrolase-like protein 5 GN=At1g06550 OS=Arabidopsis thaliana (Mouse-ear cress) PE=1 SV=2	I	Lipid transport and metabolism	enoyl-CoA hydratase/isomerase family protein [Populus trichocarpa]
gene12910	LOC107420744	8.92794	35.823	33.051	4.85171	9.28478	10.5214	0.000914298	-1.714580731	down	--	--	--	--	--	--	--	--	--
gene9068	LOC107416549	0.7631	3.50395	8.77941	1.30893	1.18867	1.67379	0.00584773	-1.71827495951757	down	--	--	Biological Process: response to stress (GO:0006950);;	--	--	--	Z	Cytoskeleton	Regulator of Vps4 activity in the MVB pathway protein, putative [Theobroma cacao]
gene29428	LOC107406007	0.36401	0.571103	7.01234	0.715545	1.0726	0.635719	0.0404326	-1.71976207268576	down	--	--	--	--	--	Glucan endo-1,3-beta-glucosidase 11 (Precursor) GN=At1g32860 OS=Arabidopsis thaliana (Mouse-ear cress) PE=1 SV=1	R	General function prediction only	PREDICTED: glucan endo-1,3-beta-glucosidase 11-like [Citrus sinensis]
gene24897	LOC107433799	0.261114	0.729728	1.49789	0.286141	0.231752	0.253233	0.0023789	-1.72302495863405	down	--	--	--	--	--	--	S	Function unknown	hypothetical protein L484_015530 [Morus notabilis]
gene5533	LOC107412685	64.4397	144.601	234.719	40.1842	45.9982	48.1204	7.50714e-07	-1.72612799591763	down	--	--	Molecular Function: transporter activity (GO:0005215);; Molecular Function: copper ion binding (GO:0005507);; Cellular Component: cell wall (GO:0005618);; Cellular Component: nucleolus (GO:0005730);; Cellular Component: mitochondrial inner membrane (GO:0005743);; Cellular Component: vacuole (GO:0005773);; Cellular Component: plasma membrane (GO:0005886);; Cellular Component: chloroplast envelope …	K05863|0|vvi:100260298|ADP,ATP carrier protein, mitochondrial; K05863 solute carrier family 25 (mitochondrial adenine nucleotide translocator), member 4/5/6/31 (A)	--	ADP,ATP carrier protein, mitochondrial (Precursor) GN=ANT OS=Solanum tuberosum (Potato) PE=2 SV=1	C	Energy production and conversion	ADP,ATP carrier protein [Morus notabilis]
gene965	LOC107417244	9.71992	17.155	36.6048	10.1136	4.01213	5.73624	0.000117491	-1.73285660311981	down	--	--	Biological Process: amino acid transmembrane transport (GO:0003333);; Molecular Function: amino acid transmembrane transporter activity (GO:0015171);; Cellular Component: integral component of membrane (GO:0016021);;	--	--	Probable amino acid permease 7 GN=AAP7 OS=Arabidopsis thaliana (Mouse-ear cress) PE=1 SV=1	E	Amino acid transport and metabolism	PREDICTED: probable amino acid permease 7-like isoform X1 [Citrus sinensis]
gene16441	LOC107424622	1.94047	7.82278	5.88169	0.775578	1.82334	2.18846	0.000970137	-1.73696954103099	down	[G]	Carbohydrate transport and metabolism	Molecular Function: hydrolase activity, hydrolyzing O-glycosyl compounds (GO:0004553);; Biological Process: cellular glucan metabolic process (GO:0006073);; Cellular Component: plant-type cell wall (GO:0009505);; Cellular Component: chloroplast (GO:0009507);; Biological Process: response to mechanical stimulus (GO:0009612);; Biological Process: response to low light intensity stimulus (GO:0009645…	K08235|0|pop:POPTR_0001s12640g|POPTRDRAFT_708892; EXGT1 family protein; K08235 xyloglucan:xyloglucosyl transferase [EC:2.4.1.207] (A)	--	Probable xyloglucan endotransglucosylase/hydrolase protein B (Precursor) GN=XTHB OS=Phaseolus angularis (Azuki bean) PE=2 SV=1	R	General function prediction only	EXGT1 family protein [Populus trichocarpa]
gene21813	LOC107430415	3.78752	5.6177	15.3108	3.05924	2.25532	2.53517	0.000102905	-1.73810902560964	down	--	--	--	K01177|0|pop:POPTR_0003s03330g|beta-amylase family protein; K01177 beta-amylase [EC:3.2.1.2] (A)	Starch and sucrose metabolism (ko00500)	Beta-amylase 3, chloroplastic (Precursor) OS=Arabidopsis thaliana (Mouse-ear cress) PE=1 SV=3	G	Carbohydrate transport and metabolism	beta-amylase family protein [Populus trichocarpa]
gene32505	LOC107409331	20.8744	57.1592	98.9205	17.33	14.9987	20.0852	5.71001e-05	-1.74400538422174	down	--	--	Cellular Component: integral component of membrane (GO:0016021);;	--	--	Lysine histidine transporter-like 8 GN=AATL1 OS=Arabidopsis thaliana (Mouse-ear cress) PE=1 SV=1	E	Amino acid transport and metabolism	PREDICTED: lysine histidine transporter-like 8 [Vitis vinifera]
gene5500	LOC107412668	1.09667	2.56947	3.88165	0.651276	0.564751	1.07759	0.000531215	-1.74495197935074	down	[G]	Carbohydrate transport and metabolism	Molecular Function: hydrolase activity, hydrolyzing O-glycosyl compounds (GO:0004553);; Biological Process: carbohydrate metabolic process (GO:0005975);;	K01188|0|cit:102626583|beta-glucosidase 12-like; K01188 beta-glucosidase [EC:3.2.1.21] (A)	Cyanoamino acid metabolism (ko00460);; Starch and sucrose metabolism (ko00500);; Phenylpropanoid biosynthesis (ko00940)	Beta-glucosidase 13 (Precursor) OS=Oryza sativa subsp. japonica (Rice) PE=2 SV=2	G	Carbohydrate transport and metabolism	PREDICTED: beta-glucosidase 12-like [Citrus sinensis]
gene29485	LOC107406066	12.6431	37.38	61.7805	11.2132	6.37233	15.1429	0.000260502	-1.74594914539925	down	--	--	Cellular Component: integral component of membrane (GO:0016021);;	--	--	Lysine histidine transporter-like 8 GN=AATL1 OS=Arabidopsis thaliana (Mouse-ear cress) PE=1 SV=1	E	Amino acid transport and metabolism	PREDICTED: lysine histidine transporter-like 8 [Vitis vinifera]
gene20045	LOC107428443	2.04952	4.58964	8.56517	1.51906	1.36752	1.64302	5.24607e-05	-1.74750130735654	down	--	--	--	--	--	Protein-tyrosine-phosphatase MKP1 GN=MKP1 OS=Arabidopsis thaliana (Mouse-ear cress) PE=1 SV=1	V	Defense mechanisms	Dual specificity protein phosphatase 4 [Morus notabilis]
gene7302	LOC107414575	1.59111	3.82085	5.62719	1.10714	0.833952	1.38651	0.000242814	-1.7478797343102	down	--	--	Biological Process: transport (GO:0006810);; Cellular Component: integral component of membrane (GO:0016021);;	K15119|0|pmum:103333673|mitochondrial carrier protein MTM1; K15119 solute carrier family 25, member 39/40 (A)	--	Mitochondrial carrier protein MTM1 GN=MTM1 OS=Arabidopsis thaliana (Mouse-ear cress) PE=2 SV=1	C	Energy production and conversion	PREDICTED: mitochondrial carrier protein MTM1 isoform X1 [Prunus mume]
gene12724	LOC107420519	0.63431	0.558192	4.18402	0.709353	0.598021	0.367508	0.0135044	-1.74908164682566	down	[V]	Defense mechanisms	Molecular Function: ATP binding (GO:0005524);; Cellular Component: plasma membrane (GO:0005886);; Biological Process: ATP catabolic process (GO:0006200);; Biological Process: response to abscisic acid (GO:0009737);; Molecular Function: ATPase activity, coupled to transmembrane movement of substances (GO:0042626);; Biological Process: abscisic acid transport (GO:0080168);;	--	--	ABC transporter G family member 25 GN=F17M19.11 OS=Arabidopsis thaliana (Mouse-ear cress) PE=2 SV=1	Q	Secondary metabolites biosynthesis, transport and catabolism	ABC transporter G family member 25 [Morus notabilis]
gene11626	LOC107419372	0.563308	0.894751	0.55961	0.165733	0.185978	0.286767	0.000545289	-1.75290849221164	down	[RTKL]	General function prediction only;; Signal transduction mechanisms;; Transcription;; Replication, recombination and repair	Molecular Function: ATP binding (GO:0005524);; Biological Process: protein phosphorylation (GO:0006468);; Cellular Component: integral component of membrane (GO:0016021);; Molecular Function: tau-protein kinase activity (GO:0050321);;	--	--	Probable inactive receptor kinase At1g48480 (Precursor) GN=RKL1 OS=Arabidopsis thaliana (Mouse-ear cress) PE=2 SV=1	T	Signal transduction mechanisms	PREDICTED: probable inactive receptor kinase At1g48480 [Pyrus x bretschneideri]
gene31539	LOC107408274	2.0449	5.67228	11.4762	2.10579	1.16092	2.44841	0.00100861	-1.75444903512687	down	[R]	General function prediction only	Molecular Function: phospholipase A2 activity (GO:0004623);; Biological Process: lipid metabolic process (GO:0006629);; Molecular Function: galactolipase activity (GO:0047714);;	--	--	Patatin-like protein 2 GN=PLP2 OS=Arabidopsis thaliana (Mouse-ear cress) PE=1 SV=1	I	Lipid transport and metabolism	Patatin group A-3 [Morus notabilis]
gene694	LOC107414349	60.9223	91.5301	33.1691	17.7666	14.6267	22.4811	7.75711e-08	-1.75774993947028	down	[E]	Amino acid transport and metabolism	--	K08248|0|pmum:103323466|(R)-mandelonitrile lyase 3-like; K08248 mandelonitrile lyase [EC:4.1.2.10] (A)	Cyanoamino acid metabolism (ko00460)	(R)-mandelonitrile lyase 3 (Precursor) GN=MDL3 OS=Prunus serotina (Black cherry) PE=2 SV=1	G	Carbohydrate transport and metabolism	PREDICTED: (R)-mandelonitrile lyase 3-like [Prunus mume]
jujube_newGene_1748	--	1.86496	3.70638	3.19818	0.499382	0.992174	1.3395	5.29848e-05	-1.76998788922402	down	--	--	Biological Process: sulfur amino acid metabolic process (GO:0000096);; Biological Process: MAPK cascade (GO:0000165);; Cellular Component: mitochondrion (GO:0005739);; Cellular Component: plasma membrane (GO:0005886);; Biological Process: glycine catabolic process (GO:0006546);; Biological Process: protein targeting to membrane (GO:0006612);; Biological Process: unsaturated fatty acid biosyntheti…	--	--	Enhanced disease susceptibility 5 GN=F19H22.130 OS=Arabidopsis thaliana (Mouse-ear cress) PE=2 SV=1	R	General function prediction only	hypothetical protein JCGZ_26746 [Jatropha curcas]
gene5545	LOC107412689	101.783	140.253	410.266	68.3503	61.487	61.1309	1.57959e-05	-1.77082214877176	down	--	--	--	--	--	Lachrymatory-factor synthase (Precursor) GN=LFS OS=Allium cepa (Onion) PE=1 SV=1	S	Function unknown	PREDICTED: lachrymatory-factor synthase-like [Prunus mume]
gene26507	LOC107435548	0.828363	2.68148	6.97483	1.10952	0.332026	1.61289	0.00782823	-1.7822374437259	down	[R]	General function prediction only	Molecular Function: transferase activity (GO:0016740);;	--	--	Zinc finger CCCH domain-containing protein 62 GN=ZFWD4 OS=Arabidopsis thaliana (Mouse-ear cress) PE=2 SV=1	R	General function prediction only	PREDICTED: vegetative incompatibility protein HET-E-1-like [Malus domestica]
gene2374	LOC107432883	1.18513	3.24415	6.81302	1.41019	0.932809	0.887848	0.00163046	-1.78254193485074	down	[H]	Coenzyme transport and metabolism	Molecular Function: prenyltransferase activity (GO:0004659);; Biological Process: isoprenoid biosynthetic process (GO:0008299);;	K13789|4.08462e-85|rcu:RCOM_0082580|geranyl geranyl pyrophosphate synthase, putative (EC:2.5.1.29); K13789 geranylgeranyl diphosphate synthase, type II [EC:2.5.1.1 2.5.1.10 2.5.1.29] (A)	Terpenoid backbone biosynthesis (ko00900)	Heterodimeric geranylgeranyl pyrophosphate synthase large subunit 1, chloroplastic (Precursor) GN=C7A10.550 OS=Arabidopsis thaliana (Mouse-ear cress) PE=1 SV=2	H	Coenzyme transport and metabolism	hypothetical protein JCGZ_00898 [Jatropha curcas]
gene3811	LOC107410844	1.50356	2.40237	2.81552	0.766476	0.41803	0.748601	1.50884e-05	-1.78676667666448	down	--	--	--	--	--	--	S	Function unknown	PREDICTED: uncharacterized protein LOC103320634 [Prunus mume]
gene12994	LOC107420834	0.424323	0.997496	2.42143	0.523768	0.257748	0.35046	0.0014205	-1.78999656247391	down	[RTKL]	General function prediction only;; Signal transduction mechanisms;; Transcription;; Replication, recombination and repair	Molecular Function: kinase activity (GO:0016301);;	--	--	Probable LRR receptor-like serine/threonine-protein kinase At4g08850 (Precursor) GN=At4g08850 OS=Arabidopsis thaliana (Mouse-ear cress) PE=2 SV=3	T	Signal transduction mechanisms	hypothetical protein PRUPE_ppa021211mg [Prunus persica]
gene23890	LOC107432686	18.0289	41.9067	103.971	14.3782	14.8294	17.894	4.67705e-05	-1.79311107000752	down	[E]	Amino acid transport and metabolism	Molecular Function: glutamate dehydrogenase [NAD(P)+] activity (GO:0004353);; Molecular Function: copper ion binding (GO:0005507);; Molecular Function: ATP binding (GO:0005524);; Cellular Component: mitochondrion (GO:0005739);; Biological Process: cellular amino acid metabolic process (GO:0006520);; Molecular Function: zinc ion binding (GO:0008270);; Biological Process: response to absence of lig…	K00261|0|rcu:RCOM_1121650|glutamate dehydrogenase, putative (EC:1.4.1.3); K00261 glutamate dehydrogenase (NAD(P)+) [EC:1.4.1.3] (A)	Alanine, aspartate and glutamate metabolism (ko00250);; Arginine and proline metabolism (ko00330);; Nitrogen metabolism (ko00910)	Glutamate dehydrogenase B GN=GDHB OS=Nicotiana plumbaginifolia (Leadwort-leaved tobacco) PE=2 SV=1	E	Amino acid transport and metabolism	glutamate dehydrogenase, putative [Ricinus communis]
gene16205	LOC107424303	5.84287	6.1645	6.65696	2.57986	1.33506	1.53865	4.84724e-08	-1.79493294662381	down	[I]	Lipid transport and metabolism	Molecular Function: hydroxymethylglutaryl-CoA reductase (NADPH) activity (GO:0004420);; Cellular Component: endoplasmic reticulum membrane (GO:0005789);; Biological Process: isoprenoid biosynthetic process (GO:0008299);; Biological Process: coenzyme A metabolic process (GO:0015936);; Cellular Component: integral component of membrane (GO:0016021);; Molecular Function: NADP binding (GO:0050661);; …	K00021|0|sot:102599791|hmg1; 3-hydroxy-3-methylglutaryl-coenzyme A reductase 1-like; K00021 hydroxymethylglutaryl-CoA reductase (NADPH) [EC:1.1.1.34] (A)	Terpenoid backbone biosynthesis (ko00900)	3-hydroxy-3-methylglutaryl-coenzyme A reductase 1 GN=HMG1 OS=Solanum tuberosum (Potato) PE=2 SV=1	I	Lipid transport and metabolism	3-hydroxy-3-methylglutaryl coenzyme A reductase [Camellia sinensis]
gene7460	LOC107414792	0.41801	4.21288	1.28296	0.89937	0.0891936	0.748844	0.0229516	-1.79688096170731	down	[RTKL]	General function prediction only;; Signal transduction mechanisms;; Transcription;; Replication, recombination and repair	--	--	--	Glycerophosphodiester phosphodiesterase protein kinase domain-containing GDPDL2 {ECO:0000305} (Precursor) OS=Arabidopsis thaliana (Mouse-ear cress) PE=1 SV=1	T	Signal transduction mechanisms	hypothetical protein F383_14633 [Gossypium arboreum]
gene7097	LOC107414394	1.49253	3.25646	10.2673	1.75695	1.20707	1.35119	0.000862834	-1.8005072037955	down	[RTKL]	General function prediction only;; Signal transduction mechanisms;; Transcription;; Replication, recombination and repair	--	--	--	Receptor-like serine/threonine-protein kinase At4g25390 (Precursor) GN=At4g25390 OS=Arabidopsis thaliana (Mouse-ear cress) PE=2 SV=1	T	Signal transduction mechanisms	Receptor-like serine/threonine-protein kinase [Morus notabilis]
gene6467	LOC107413702	11.6911	18.6595	51.5529	6.46747	8.33809	8.92386	1.67441e-05	-1.80091610415434	down	[R]	General function prediction only	Molecular Function: zinc ion binding (GO:0008270);;	--	--	--	O	Posttranslational modification, protein turnover, chaperones	PREDICTED: uncharacterized protein LOC103332357 isoform X1 [Prunus mume]
gene7266	LOC107414589	1.05235	5.64827	4.16803	0.959554	1.00843	1.16213	0.000440344	-1.80385098721742	down	[RTKL]	General function prediction only;; Signal transduction mechanisms;; Transcription;; Replication, recombination and repair	--	--	--	Glycerophosphodiester phosphodiesterase protein kinase domain-containing GDPDL2 {ECO:0000305} (Precursor) OS=Arabidopsis thaliana (Mouse-ear cress) PE=1 SV=1	T	Signal transduction mechanisms	putative receptor-like protein kinase [Morus notabilis]
gene13539	LOC107421447	38.5931	75.1175	135.623	19.3403	21.8768	27.7643	4.8677e-07	-1.80771684545699	down	[R]	General function prediction only	Molecular Function: oxidoreductase activity, acting on paired donors, with incorporation or reduction of molecular oxygen, 2-oxoglutarate as one donor, and incorporation of one atom each of oxygen into both donors (GO:0016706);; Biological Process: single-organism metabolic process (GO:0044710);;	--	--	Probable 2-oxoglutarate/Fe(II)-dependent dioxygenase GN=DIOX2 OS=Papaver somniferum (Opium poppy) PE=2 SV=1	Q	Secondary metabolites biosynthesis, transport and catabolism	hypothetical protein PRUPE_ppa007619mg [Prunus persica]
gene11306	LOC107418979	39.8046	49.9061	145.171	40.0045	18.0042	9.19116	0.000347988	-1.80774216468511	down	[G]	Carbohydrate transport and metabolism	Cellular Component: vacuole (GO:0005773);; Biological Process: carbohydrate metabolic process (GO:0005975);; Biological Process: defense response (GO:0006952);; Molecular Function: glucan endo-1,3-beta-D-glucosidase activity (GO:0042973);;	--	--	Glucan endo-1,3-beta-glucosidase major form (Precursor) GN=HGN1 OS=Hevea brasiliensis (Para rubber tree) PE=1 SV=2	R	General function prediction only	unknown [Populus trichocarpa x Populus deltoides]
gene660	LOC107414091	2.70206	5.24053	5.81982	1.2268	0.971595	2.03806	1.14224e-05	-1.81159330328816	down	--	--	--	--	--	Remorin OS=Solanum tuberosum (Potato) PE=1 SV=1	S	Function unknown	Remorin family protein isoform 1 [Theobroma cacao]
gene9047	LOC107416504	0.471371	3.07993	4.63451	1.08761	0.440138	0.824695	0.00548696	-1.81189009756896	down	--	--	--	K08472|3.98456e-154|tcc:TCM_041068|MLO, putative; K08472 mlo protein (A)	--	MLO-like protein 2 GN=MLO2 OS=Arabidopsis thaliana (Mouse-ear cress) PE=1 SV=1	S	Function unknown	PREDICTED: MLO-like protein 3 isoform X2 [Pyrus x bretschneideri]
gene4225	LOC107411282	4.31193	5.62128	1.03091	1.26924	1.01982	0.805115	0.00139943	-1.81398557986532	down	[P]	Inorganic ion transport and metabolism	--	K00434|1.47643e-147|tcc:TCM_042003|Ascorbate peroxidase 1; K00434 L-ascorbate peroxidase [EC:1.11.1.11] (A)	Ascorbate and aldarate metabolism (ko00053);; Glutathione metabolism (ko00480)	L-ascorbate peroxidase, cytosolic GN=APX1 OS=Pisum sativum (Garden pea) PE=1 SV=2	R	General function prediction only	ascorbate peroxidase [Ziziphus jujuba]
gene25912	LOC107434916	0.169735	0.544076	0.96974	0.315586	0.0337918	0.125633	0.011437	-1.81834236966733	down	--	--	--	--	--	TMV resistance protein N GN=N OS=Nicotiana glutinosa (Tobacco) PE=1 SV=1	T	Signal transduction mechanisms	hypothetical protein PRUPE_ppb015618mg [Prunus persica]
gene530	LOC107412561	12.2688	9.51712	10.59	1.21088	0.405035	7.39018	0.0106664	-1.8247303948668	down	--	--	--	--	--	Protein TIFY 5A GN=T2H7 OS=Arabidopsis thaliana (Mouse-ear cress) PE=1 SV=1	S	Function unknown	PREDICTED: protein TIFY 5A [Vitis vinifera]
gene22636	LOC107431311	0.991856	1.68165	4.58154	0.51338	0.941402	0.645841	0.00143101	-1.82871165572638	down	[M]	Cell wall/membrane/envelope biogenesis	Biological Process: biosynthetic process (GO:0009058);; Molecular Function: transferase activity, transferring glycosyl groups (GO:0016757);;	--	--	--	M	Cell wall/membrane/envelope biogenesis	PREDICTED: uncharacterized protein LOC100804436 [Glycine max]
gene20310	LOC107428790	1.59357	1.0791	7.58463	0.589623	1.11605	1.17489	0.00532326	-1.83247916120287	down	[O]	Posttranslational modification, protein turnover, chaperones	--	K00799|2.27355e-113|pxb:103950892|glutathione S-transferase U17-like; K00799 glutathione S-transferase [EC:2.5.1.18] (A)	Glutathione metabolism (ko00480)	Glutathione S-transferase U17 GN=At1g10370 OS=Arabidopsis thaliana (Mouse-ear cress) PE=2 SV=1	O	Posttranslational modification, protein turnover, chaperones	PREDICTED: glutathione S-transferase U17-like [Pyrus x bretschneideri]
gene11609	LOC107419326	1.89671	10.5529	4.41631	1.66498	1.17294	1.92934	0.000413961	-1.83326197489887	down	--	--	--	K18875|0|pper:PRUPE_ppa019013mg|hypothetical protein; K18875 enhanced disease susceptibility 1 protein (A)	Plant-pathogen interaction (ko04626)	Protein EDS1L {ECO:0000305} OS=Arabidopsis thaliana (Mouse-ear cress) PE=1 SV=1	R	General function prediction only	hypothetical protein L484_008925 [Morus notabilis]
gene13546	LOC107421449	12.5332	28.784	39.2304	5.92571	5.71282	9.9685	7.019e-05	-1.83560261606993	down	[R]	General function prediction only	Molecular Function: oxidoreductase activity, acting on paired donors, with incorporation or reduction of molecular oxygen, 2-oxoglutarate as one donor, and incorporation of one atom each of oxygen into both donors (GO:0016706);;	--	--	Probable 2-oxoglutarate/Fe(II)-dependent dioxygenase GN=DIOX2 OS=Papaver somniferum (Opium poppy) PE=2 SV=1	Q	Secondary metabolites biosynthesis, transport and catabolism	PREDICTED: 2&apos;-deoxymugineic-acid 2&apos;-dioxygenase-like [Prunus mume]
gene15633	LOC107423748	26.5598	16.7893	0.497019	6.48146	2.61392	2.83342	0.0220574	-1.8428008024287	down	[CR]	Energy production and conversion;; General function prediction only	Molecular Function: NADPH:quinone reductase activity (GO:0003960);; Molecular Function: zinc ion binding (GO:0008270);; Biological Process: oxidation-reduction process (GO:0055114);;	--	--	2-methylene-furan-3-one reductase (Precursor) GN=EO OS=Solanum lycopersicum (Tomato) PE=1 SV=1	Q	Secondary metabolites biosynthesis, transport and catabolism	PREDICTED: 2-methylene-furan-3-one reductase-like [Eucalyptus grandis]
gene1306	LOC107420586	3.01986	8.20889	13.5138	1.42846	2.22822	2.99224	6.45166e-05	-1.85505961898226	down	[RTKL]	General function prediction only;; Signal transduction mechanisms;; Transcription;; Replication, recombination and repair	Molecular Function: protein kinase activity (GO:0004672);; Biological Process: cellular process (GO:0009987);;	--	--	Cysteine-rich receptor-like protein kinase 10 (Precursor) GN=F21P8.70 OS=Arabidopsis thaliana (Mouse-ear cress) PE=1 SV=3	T	Signal transduction mechanisms	Cysteine-rich receptor-like protein kinase 10 [Morus notabilis]
gene13568	LOC107421475	7.59363	17.3095	28.91	5.97206	4.64203	5.84787	6.62691e-06	-1.86608356116166	down	[C]	Energy production and conversion	Molecular Function: FMN binding (GO:0010181);; Molecular Function: oxidoreductase activity (GO:0016491);; Biological Process: oxidation-reduction process (GO:0055114);;	K05894|0|pmum:103319316|12-oxophytodienoate reductase 2-like; K05894 12-oxophytodienoic acid reductase [EC:1.3.1.42] (A)	alpha-Linolenic acid metabolism (ko00592)	12-oxophytodienoate reductase 2 GN=OPR2 OS=Arabidopsis thaliana (Mouse-ear cress) PE=1 SV=2	C	Energy production and conversion	PREDICTED: 12-oxophytodienoate reductase 2-like [Prunus mume]
gene23802	LOC107432587	3.86364	9.30166	10.4719	1.74306	1.27809	1.14218	2.2833e-05	-1.86717098772595	down	[RTKL]	General function prediction only;; Signal transduction mechanisms;; Transcription;; Replication, recombination and repair	Molecular Function: protein kinase activity (GO:0004672);;	--	--	Probable LRR receptor-like serine/threonine-protein kinase At1g53430 (Precursor) GN=At1g53430 OS=Arabidopsis thaliana (Mouse-ear cress) PE=1 SV=1	T	Signal transduction mechanisms	hypothetical protein PRUPE_ppa000854mg [Prunus persica]
gene18650	LOC107426985	19.4845	19.5794	50.4126	5.56538	7.86151	8.50965	2.90368e-08	-1.86986413167002	down	[HE]	Coenzyme transport and metabolism;; Amino acid transport and metabolism	Molecular Function: phosphoglycerate dehydrogenase activity (GO:0004617);; Molecular Function: ATP binding (GO:0005524);; Cellular Component: mitochondrion (GO:0005739);; Biological Process: L-serine biosynthetic process (GO:0006564);; Cellular Component: chloroplast (GO:0009507);; Biological Process: megagametogenesis (GO:0009561);; Cellular Component: membrane (GO:0016020);; Molecular Function:…	K00058|0|cam:101513477|d-3-phosphoglycerate dehydrogenase, chloroplastic-like; K00058 D-3-phosphoglycerate dehydrogenase [EC:1.1.1.95] (A)	Glycine, serine and threonine metabolism (ko00260);; Carbon metabolism (ko01200);; Biosynthesis of amino acids (ko01230)	D-3-phosphoglycerate dehydrogenase 1, chloroplastic (Precursor) GN=F10M10.7 OS=Arabidopsis thaliana (Mouse-ear cress) PE=1 SV=1	E	Amino acid transport and metabolism	PREDICTED: d-3-phosphoglycerate dehydrogenase, chloroplastic-like isoform X1 [Cicer arietinum]
gene5310	LOC107412435	2.03823	99.0522	220.328	34.145	25.6597	26.1495	0.0182176	-1.87693665041325	down	--	--	Biological Process: metabolic process (GO:0008152);; Molecular Function: hydrolase activity, acting on glycosyl bonds (GO:0016798);;	--	--	Lichenase (Precursor) GN=GN1 OS=Nicotiana plumbaginifolia (Leadwort-leaved tobacco) PE=2 SV=3	R	General function prediction only	PREDICTED: glucan endo-1,3-beta-glucosidase-like [Eucalyptus grandis]
gene16018	LOC107424161	11.4218	43.8571	60.9641	7.55738	11.2703	12.4759	0.000284122	-1.88180062663987	down	--	--	--	--	--	Arabinogalactan peptide 20 (Precursor) GN=AGP20 OS=Arabidopsis thaliana (Mouse-ear cress) PE=3 SV=1	R	General function prediction only	PREDICTED: arabinogalactan peptide 20-like [Nelumbo nucifera]
gene16222	LOC107424386	2.69191	10.3342	2.85687	0.87332	1.11574	2.3628	0.00156672	-1.88576245241972	down	--	--	Molecular Function: lyase activity (GO:0016829);;	--	--	--	R	General function prediction only	hypothetical protein L484_026715 [Morus notabilis]
gene18952	LOC107427312	15.7615	30.9663	47.3974	5.9454	7.46541	11.8927	1.74244e-06	-1.89044987582068	down	--	--	Cellular Component: extracellular region (GO:0005576);; Cellular Component: plant-type cell wall (GO:0009505);; Cellular Component: membrane (GO:0016020);; Biological Process: sexual reproduction (GO:0019953);;	--	--	Expansin-like A1 (Precursor) GN=F16L2_180 OS=Arabidopsis thaliana (Mouse-ear cress) PE=2 SV=1	R	General function prediction only	expansin-like 1 [Ziziphus jujuba]
gene10385	LOC107417969	1.7134	3.97888	9.17049	1.52597	1.10921	1.32148	0.000101858	-1.90176283182267	down	[E]	Amino acid transport and metabolism	Molecular Function: catalytic activity (GO:0003824);; Biological Process: metabolic process (GO:0008152);; Molecular Function: molybdenum ion binding (GO:0030151);; Molecular Function: pyridoxal phosphate binding (GO:0030170);;	K15631|0|pxb:103952011|molybdenum cofactor sulfurase; K15631 molybdenum cofactor sulfurtransferase [EC:2.8.1.9] (A)	--	Molybdenum cofactor sulfurase {ECO:0000255|HAMAP-Rule:MF_03050} GN=FLACCA OS=Solanum lycopersicum (Tomato) PE=2 SV=1	H	Coenzyme transport and metabolism	PREDICTED: molybdenum cofactor sulfurase isoform X4 [Pyrus x bretschneideri]
gene30355	LOC107406999	11.7626	11.8785	32.3053	3.9234	4.85541	6.17965	6.17017e-07	-1.90332717424669	down	[HE]	Coenzyme transport and metabolism;; Amino acid transport and metabolism	Molecular Function: phosphoglycerate dehydrogenase activity (GO:0004617);; Molecular Function: ATP binding (GO:0005524);; Cellular Component: mitochondrion (GO:0005739);; Biological Process: L-serine biosynthetic process (GO:0006564);; Cellular Component: chloroplast (GO:0009507);; Biological Process: megagametogenesis (GO:0009561);; Cellular Component: membrane (GO:0016020);; Molecular Function:…	K00058|0|cam:101513477|d-3-phosphoglycerate dehydrogenase, chloroplastic-like; K00058 D-3-phosphoglycerate dehydrogenase [EC:1.1.1.95] (A)	Glycine, serine and threonine metabolism (ko00260);; Carbon metabolism (ko01200);; Biosynthesis of amino acids (ko01230)	D-3-phosphoglycerate dehydrogenase 1, chloroplastic (Precursor) GN=F10M10.7 OS=Arabidopsis thaliana (Mouse-ear cress) PE=1 SV=1	E	Amino acid transport and metabolism	PREDICTED: d-3-phosphoglycerate dehydrogenase, chloroplastic-like isoform X1 [Cicer arietinum]
gene1241	LOC107419518	5.20545	6.14227	24.5045	2.69752	2.18695	3.61694	0.00012346	-1.91621474744634	down	[V]	Defense mechanisms	Biological Process: drug transmembrane transport (GO:0006855);; Molecular Function: drug transmembrane transporter activity (GO:0015238);; Molecular Function: antiporter activity (GO:0015297);; Cellular Component: membrane (GO:0016020);;	K03327|0|vvi:100262309|protein TRANSPARENT TESTA 12; K03327 multidrug resistance protein, MATE family (A)	--	Protein TRANSPARENT TESTA 12 GN=F17J16_80 OS=Arabidopsis thaliana (Mouse-ear cress) PE=2 SV=1	S	Function unknown	Protein TRANSPARENT TESTA 12 -like protein [Gossypium arboreum]
gene13677	LOC107421583	57.1395	130.754	472.25	78.0889	47.9909	46.1707	0.000428072	-1.9235156957006	down	--	--	Biological Process: metabolic process (GO:0008152);; Molecular Function: carbon-sulfur lyase activity (GO:0016846);; Molecular Function: pyridoxal phosphate binding (GO:0030170);;	--	--	Tryptophan aminotransferase-related protein 4 OS=Arabidopsis thaliana (Mouse-ear cress) PE=2 SV=2	R	General function prediction only	PREDICTED: tryptophan aminotransferase-related protein 4-like [Pyrus x bretschneideri]
gene2160	LOC107430810	0.74657	2.84833	3.99785	0.381009	0.720757	0.927029	0.000390745	-1.93076537638828	down	[RTKL]	General function prediction only;; Signal transduction mechanisms;; Transcription;; Replication, recombination and repair	--	--	--	G-type lectin S-receptor-like serine/threonine-protein kinase At4g27290 (Precursor) GN=At4g27290 OS=Arabidopsis thaliana (Mouse-ear cress) PE=3 SV=4	T	Signal transduction mechanisms	Receptor-like serine/threonine-protein kinase SD1-8 [Morus notabilis]
gene4863	LOC107412008	92.9517	157.952	284.523	64.0213	43.9643	41.6337	2.33633e-08	-1.93268223088055	down	--	--	Molecular Function: iron ion binding (GO:0005506);; Molecular Function: linoleate 13S-lipoxygenase activity (GO:0016165);; Biological Process: oxylipin biosynthetic process (GO:0031408);; Biological Process: oxidation-reduction process (GO:0055114);;	K15718|0|pper:PRUPE_ppa001293mg|hypothetical protein; K15718 linoleate 9S-lipoxygenase [EC:1.13.11.58] (A)	Linoleic acid metabolism (ko00591)	Probable linoleate 9S-lipoxygenase 5 GN=LOX1.5 OS=Solanum tuberosum (Potato) PE=2 SV=1	S	Function unknown	lipoxygenase [Corylus avellana]
gene16145	LOC107424352	1.71867	4.73718	10.2802	1.77842	1.19322	1.39681	0.000660763	-1.93349742191043	down	--	--	Cellular Component: integral component of membrane (GO:0016021);;	--	--	Lysine histidine transporter-like 8 GN=AATL1 OS=Arabidopsis thaliana (Mouse-ear cress) PE=1 SV=1	E	Amino acid transport and metabolism	PREDICTED: lysine histidine transporter-like 8 [Vitis vinifera]
gene28367	LOC107404855	2.56551	16.8245	3.40438	3.30685	1.12811	1.65064	0.00607592	-1.94519815754122	down	--	--	--	--	--	--	S	Function unknown	PREDICTED: uncharacterized protein LOC103431360 [Malus domestica]
gene14010	LOC107421963	10.0117	15.284	35.3203	5.36765	5.8943	5.17072	6.23424e-08	-1.94663364737642	down	[Z]	Cytoskeleton	Molecular Function: motor activity (GO:0003774);; Molecular Function: ATP binding (GO:0005524);; Cellular Component: plasma membrane (GO:0005886);; Cellular Component: cell plate (GO:0009504);; Cellular Component: phragmoplast (GO:0009524);; Cellular Component: myosin complex (GO:0016459);;	--	--	Myosin-1 GN=MZE19.1 OS=Arabidopsis thaliana (Mouse-ear cress) PE=1 SV=1	Z	Cytoskeleton	PREDICTED: myosin-1 [Prunus mume]
gene19066	LOC107427482	20.0271	38.698	92.8611	11.8607	12.61	14.8183	1.93154e-06	-1.94723705300542	down	[HC]	Coenzyme transport and metabolism;; Energy production and conversion	Molecular Function: squalene monooxygenase activity (GO:0004506);; Cellular Component: integral component of membrane (GO:0016021);; Molecular Function: flavin adenine dinucleotide binding (GO:0050660);; Biological Process: oxidation-reduction process (GO:0055114);;	K00511|0|mtr:MTR_4g092640|Squalene epoxidase; K00511 squalene monooxygenase [EC:1.14.13.132] (A)	Steroid biosynthesis (ko00100);; Sesquiterpenoid and triterpenoid biosynthesis (ko00909)	Squalene monooxygenase OS=Panax ginseng (Korean ginseng) PE=2 SV=1	I	Lipid transport and metabolism	Squalene monooxygenase [Morus notabilis]
gene17174	LOC107425391	3.65602	29.3608	77.8269	8.27139	7.95135	12.8762	0.00291018	-1.94736809292683	down	[Q]	Secondary metabolites biosynthesis, transport and catabolism	--	--	--	L-ascorbate oxidase (Precursor) OS=Cucumis sativus (Cucumber) PE=1 SV=1	Q	Secondary metabolites biosynthesis, transport and catabolism	PREDICTED: L-ascorbate oxidase [Prunus mume]
gene16808	LOC107425034	51.6842	152.856	75.2568	3.97492	21.2199	46.8697	0.00117159	-1.95700756835508	down	--	--	Cellular Component: cell wall (GO:0005618);; Biological Process: cellular glucan metabolic process (GO:0006073);; Biological Process: response to water deprivation (GO:0009414);; Molecular Function: xyloglucan:xyloglucosyl transferase activity (GO:0016762);; Molecular Function: xyloglucan-specific endo-beta-1,4-glucanase activity (GO:0033946);; Cellular Component: apoplast (GO:0048046);;	K08235|0|pper:PRUPE_ppa009472mg|hypothetical protein; K08235 xyloglucan:xyloglucosyl transferase [EC:2.4.1.207] (A)	--	Probable xyloglucan endotransglucosylase/hydrolase protein 6 (Precursor) GN=MPA24.8 OS=Arabidopsis thaliana (Mouse-ear cress) PE=2 SV=2	G	Carbohydrate transport and metabolism	hypothetical protein PRUPE_ppa009472mg [Prunus persica]
gene33262	LOC107410155	21.4483	69.7958	98.9845	26.1451	10.9739	12.1991	3.50712e-05	-1.95738162218776	down	--	--	--	--	--	Basic secretory protease {ECO:0000303|PubMed:22773449} (Fragments) OS=Boswellia serrata (Indian frankincense) PE=1 SV=1	R	General function prediction only	hypothetical protein PRUPE_ppa018700mg [Prunus persica]
gene4058	LOC107411108	2.18626	6.22081	14.7931	1.50578	1.72072	2.6967	0.000319072	-1.97558961176938	down	--	--	--	--	--	Clathrin interactor EPSIN 2 OS=Arabidopsis thaliana (Mouse-ear cress) PE=1 SV=1	F	Nucleotide transport and metabolism	hypothetical protein PRUPE_ppa008195mg [Prunus persica]
gene27768	LOC107404190	13.1579	44.6172	98.2098	12.7299	12.2197	14.541	4.76468e-05	-1.97752720558202	down	[I]	Lipid transport and metabolism	Biological Process: unsaturated fatty acid biosynthetic process (GO:0006636);; Molecular Function: oxidoreductase activity, acting on paired donors, with oxidation of a pair of donors resulting in the reduction of molecular oxygen to two molecules of water (GO:0016717);; Molecular Function: delta12-fatty acid dehydrogenase activity (GO:0016720);; Cellular Component: chloroplast membrane (GO:00319…	K10257|0|pper:PRUPE_ppa005645mg|hypothetical protein; K10257 omega-3 fatty acid desaturase (delta-15 desaturase) [EC:1.14.19.-] (A)	Biosynthesis of unsaturated fatty acids (ko01040);; Fatty acid metabolism (ko01212)	Omega-3 fatty acid desaturase, chloroplastic (Precursor) GN=FAD7A-1 OS=Ricinus communis (Castor bean) PE=2 SV=1	I	Lipid transport and metabolism	hypothetical protein PRUPE_ppa005645mg [Prunus persica]
gene14992	LOC107423016	17.0243	46.5854	69.2668	8.61215	9.00248	15.7952	5.56895e-06	-1.98285496829096	down	--	--	Cellular Component: anchored component of plasma membrane (GO:0046658);;	--	--	Uncharacterized GPI-anchored protein At3g06035 (Precursor) GN=At3g06035 OS=Arabidopsis thaliana (Mouse-ear cress) PE=2 SV=1	R	General function prediction only	PREDICTED: uncharacterized GPI-anchored protein At3g06035-like [Malus domestica]
gene8329	LOC107415793	100.814	303.969	291.307	43.559	47.7817	82.7699	6.73306e-08	-2.005478098764	down	[E]	Amino acid transport and metabolism	Molecular Function: glutamate decarboxylase activity (GO:0004351);; Molecular Function: calmodulin binding (GO:0005516);; Biological Process: glutamate metabolic process (GO:0006536);; Molecular Function: pyridoxal phosphate binding (GO:0030170);; Biological Process: response to cadmium ion (GO:0046686);;	K01580|0|rcu:RCOM_0112580|glutamate decarboxylase, putative (EC:4.1.1.15); K01580 glutamate decarboxylase [EC:4.1.1.15] (A)	Alanine, aspartate and glutamate metabolism (ko00250);; beta-Alanine metabolism (ko00410);; Taurine and hypotaurine metabolism (ko00430);; Butanoate metabolism (ko00650)	Glutamate decarboxylase 1 OS=Arabidopsis thaliana (Mouse-ear cress) PE=1 SV=2	E	Amino acid transport and metabolism	glutamate decarboxylase, putative [Ricinus communis]
gene18219	LOC107426648	3.52775	7.73759	8.8446	1.40823	1.48176	2.73822	8.7916e-06	-2.0202023529635	down	--	--	--	--	--	--	S	Function unknown	PREDICTED: uncharacterized protein LOC103334336 [Prunus mume]
gene14330	LOC107422327	3.84053	15.9979	4.90595	0.526641	1.68855	3.8436	0.00178009	-2.02683763175723	down	--	--	Molecular Function: hydrolase activity, hydrolyzing O-glycosyl compounds (GO:0004553);; Cellular Component: cell wall (GO:0005618);; Biological Process: cellular glucan metabolic process (GO:0006073);; Molecular Function: xyloglucan:xyloglucosyl transferase activity (GO:0016762);; Cellular Component: apoplast (GO:0048046);;	K08235|1.09659e-170|pper:PRUPE_ppa009792mg|hypothetical protein; K08235 xyloglucan:xyloglucosyl transferase [EC:2.4.1.207] (A)	--	Xyloglucan endotransglucosylase/hydrolase 2 {ECO:0000250|UniProtKB:Q38857} (Precursor) OS=Glycine max (Soybean) PE=2 SV=1	G	Carbohydrate transport and metabolism	hypothetical protein PRUPE_ppa009792mg [Prunus persica]
gene22772	LOC107431452	0.875725	1.33129	3.66117	0.567953	0.558128	0.290669	0.000376947	-2.03152645980633	down	[RTKL]	General function prediction only;; Signal transduction mechanisms;; Transcription;; Replication, recombination and repair	Molecular Function: protein serine/threonine kinase activity (GO:0004674);; Molecular Function: ATP binding (GO:0005524);; Biological Process: protein phosphorylation (GO:0006468);;	--	--	Probable receptor-like protein kinase At5g47070 GN=At5g47070 OS=Arabidopsis thaliana (Mouse-ear cress) PE=1 SV=1	T	Signal transduction mechanisms	PREDICTED: probable receptor-like protein kinase At5g47070 isoform X1 [Pyrus x bretschneideri]
gene32145	LOC107408937	8.78639	27.3286	45.9493	7.09389	5.10118	7.84095	3.52797e-05	-2.03517363205566	down	--	--	Cellular Component: integral component of membrane (GO:0016021);;	--	--	Lysine histidine transporter-like 8 GN=AATL1 OS=Arabidopsis thaliana (Mouse-ear cress) PE=1 SV=1	E	Amino acid transport and metabolism	PREDICTED: lysine histidine transporter-like 8 [Vitis vinifera]
gene12482	LOC107420301	0.935632	2.37329	5.82745	0.480697	0.620623	1.21574	0.000495984	-2.04512608942778	down	[RTKL]	General function prediction only;; Signal transduction mechanisms;; Transcription;; Replication, recombination and repair	Molecular Function: nucleotide binding (GO:0000166);; Molecular Function: protein kinase activity (GO:0004672);; Biological Process: phosphorylation (GO:0016310);; Molecular Function: oxidoreductase activity (GO:0016491);;	--	--	Wall-associated receptor kinase-like 14 (Precursor) GN=WAKL14 OS=Arabidopsis thaliana (Mouse-ear cress) PE=2 SV=2	T	Signal transduction mechanisms	PREDICTED: wall-associated receptor kinase-like 14 [Prunus mume]
gene21359	LOC107429941	5.00991	60.4399	24.522	13.5279	6.06939	3.12033	0.00198058	-2.05231933918493	down	--	--	Cellular Component: extracellular region (GO:0005576);; Biological Process: killing of cells of other organism (GO:0031640);; Biological Process: defense response to fungus (GO:0050832);;	--	--	Thaumatin-like protein (Precursor) GN=tlp OS=Actinidia deliciosa (Kiwi) PE=1 SV=2	R	General function prediction only	PREDICTED: protein P21-like [Pyrus x bretschneideri]
gene7527	LOC107414867	1.01973	2.55732	1.53026	0.401246	0.241004	0.59139	3.55455e-05	-2.06061255791076	down	--	--	Biological Process: anthocyanin-containing compound biosynthetic process (GO:0009718);; Biological Process: response to sucrose (GO:0009744);; Biological Process: response to UV-B (GO:0010224);; Molecular Function: anthocyanidin 3-O-glucosyltransferase activity (GO:0047213);; Molecular Function: quercetin 3-O-glucosyltransferase activity (GO:0080043);; Biological Process: response to karrikin (GO…	K12930|0|pop:POPTR_0013s12310g|UDP-glucoronosyl/UDP-glucosyl transferase family protein; K12930 anthocyanidin 3-O-glucosyltransferase [EC:2.4.1.115] (A)	Anthocyanin biosynthesis (ko00942)	UDP-glycosyltransferase 78D2 GN=F2K13.200 OS=Arabidopsis thaliana (Mouse-ear cress) PE=2 SV=1	CG	Energy production and conversion;; Carbohydrate transport and metabolism	UDP-glucoronosyl/UDP-glucosyl transferase family protein [Populus trichocarpa]
gene33079	LOC107409956	613.79	1082.01	1538.31	307.864	176.235	291.078	1.36947e-10	-2.06070252957602	down	[O]	Posttranslational modification, protein turnover, chaperones	Molecular Function: catalytic activity (GO:0003824);;	K00799|8.87819e-97|pper:PRUPE_ppa026659mg|hypothetical protein; K00799 glutathione S-transferase [EC:2.5.1.18] (A)	Glutathione metabolism (ko00480)	Glutathione S-transferase U9 GN=K19B1.9 OS=Arabidopsis thaliana (Mouse-ear cress) PE=2 SV=1	O	Posttranslational modification, protein turnover, chaperones	glutathione S-transferase [Ziziphus jujuba]
gene6862	LOC107414132	55.2217	145.79	240.432	41.1109	33.5	31.3056	6.33616e-08	-2.062698409024	down	[E]	Amino acid transport and metabolism	Molecular Function: glutamate dehydrogenase (NAD+) activity (GO:0004352);; Molecular Function: glutamate dehydrogenase [NAD(P)+] activity (GO:0004353);; Molecular Function: copper ion binding (GO:0005507);; Molecular Function: ATP binding (GO:0005524);; Cellular Component: mitochondrion (GO:0005739);; Cellular Component: plasma membrane (GO:0005886);; Biological Process: cellular amino acid metab…	K00261|0|pper:PRUPE_ppa006442mg|hypothetical protein; K00261 glutamate dehydrogenase (NAD(P)+) [EC:1.4.1.3] (A)	Alanine, aspartate and glutamate metabolism (ko00250);; Arginine and proline metabolism (ko00330);; Nitrogen metabolism (ko00910)	Glutamate dehydrogenase 2 GN=GDH2 OS=Arabidopsis thaliana (Mouse-ear cress) PE=1 SV=1	E	Amino acid transport and metabolism	PREDICTED: glutamate dehydrogenase 2 [Prunus mume]
gene13603	LOC107421542	2.15133	11.0101	7.48572	2.2834	1.33293	1.38055	9.64041e-05	-2.0755642587387	down	--	--	Molecular Function: calcium ion binding (GO:0005509);; Molecular Function: calcium-dependent phospholipid binding (GO:0005544);;	--	--	Annexin D6 OS=Arabidopsis thaliana (Mouse-ear cress) PE=2 SV=1	U	Intracellular trafficking, secretion, and vesicular transport	PREDICTED: annexin D2-like [Cucumis sativus]
gene775	LOC107415427	0.74781	1.55976	3.9435	0	0.201754	1.25464	0.0160123	-2.08702280358065	down	[E]	Amino acid transport and metabolism	Molecular Function: transferase activity (GO:0016740);;	K00640|4.42154e-129|vvi:100260128|serine acetyltransferase 1, chloroplastic-like; K00640 serine O-acetyltransferase [EC:2.3.1.30] (A)	Cysteine and methionine metabolism (ko00270);; Sulfur metabolism (ko00920);; Carbon metabolism (ko01200);; Biosynthesis of amino acids (ko01230)	Serine acetyltransferase 1, chloroplastic GN=F14J16.18 OS=Arabidopsis thaliana (Mouse-ear cress) PE=1 SV=2	E	Amino acid transport and metabolism	PREDICTED: serine acetyltransferase 1, chloroplastic-like [Vitis vinifera]
gene26727	LOC107435808	130.701	246.187	287.764	26.9441	70.0193	58.344	1.74445e-09	-2.09992222912597	down	[G]	Carbohydrate transport and metabolism	Molecular Function: transporter activity (GO:0005215);; Biological Process: transport (GO:0006810);; Cellular Component: integral component of membrane (GO:0016021);;	K09872|0|cit:102618921|probable aquaporin PIP1-2-like; K09872 aquaporin PIP (A)	--	Probable aquaporin PIP1-4 OS=Arabidopsis thaliana (Mouse-ear cress) PE=1 SV=1	G	Carbohydrate transport and metabolism	hypothetical protein CICLE_v10012384mg [Citrus clementina]
gene22215	LOC107430874	2.58882	5.35896	1.99478	1.02145	0.348223	1.05356	0.000144224	-2.10034012959656	down	--	--	--	--	--	--	S	Function unknown	unnamed protein product [Vitis vinifera]
gene17783	LOC107426053	8.60245	3.5755	4.8807	1.84593	0.986373	1.18119	1.40412e-05	-2.10064811836574	down	--	--	Cellular Component: plasma membrane (GO:0005886);; Biological Process: carbohydrate transport (GO:0008643);; Cellular Component: integral component of membrane (GO:0016021);;	K15382|2.66465e-112|pmum:103333947|bidirectional sugar transporter SWEET14-like; K15382 solute carrier family 50 (sugar transporter) (A)	--	Bidirectional sugar transporter NEC1 GN=NEC1 OS=Petunia hybrida (Petunia) PE=2 SV=1	R	General function prediction only	PREDICTED: bidirectional sugar transporter SWEET14-like [Prunus mume]
gene20705	LOC107429214	3.05541	2.39553	4.63541	0.701587	1.17406	0.521799	3.87042e-06	-2.10325054803938	down	[R]	General function prediction only	Biological Process: vacuole organization (GO:0007033);; Biological Process: response to wounding (GO:0009611);; Biological Process: anthocyanin-containing compound biosynthetic process (GO:0009718);; Biological Process: response to jasmonic acid (GO:0009753);; Biological Process: proanthocyanidin biosynthetic process (GO:0010023);; Molecular Function: oxidoreductase activity, acting on single don…	K05277|0|pop:POPTR_0003s11900g|POPTRDRAFT_646527; Leucoanthocyanidin dioxygenase family protein; K05277 leucoanthocyanidin dioxygenase [EC:1.14.11.19] (A)	Flavonoid biosynthesis (ko00941)	Leucoanthocyanidin dioxygenase GN=ANS OS=Malus domestica (Apple) PE=2 SV=1	H	Coenzyme transport and metabolism	Leucoanthocyanidin dioxygenase family protein [Populus trichocarpa]
gene14025	LOC107421976	0.942402	1.45315	1.36606	0.272606	0.398064	0.225249	2.70372e-05	-2.10388376622402	down	--	--	Biological Process: carbohydrate metabolic process (GO:0005975);; Molecular Function: raffinose alpha-galactosidase activity (GO:0052692);;	K07407|0|rcu:RCOM_1454590|alpha-galactosidase/alpha-n-acetylgalactosaminidase, putative (EC:3.2.1.22); K07407 alpha-galactosidase [EC:3.2.1.22] (A)	Galactose metabolism (ko00052);; Glycerolipid metabolism (ko00561);; Sphingolipid metabolism (ko00600);; Glycosphingolipid biosynthesis - globo series (ko00603)	Alpha-galactosidase (Precursor) OS=Coffea arabica (Arabian coffee) PE=1 SV=1	G	Carbohydrate transport and metabolism	alpha-galactosidase/alpha-n-acetylgalactosaminidase, putative [Ricinus communis]
gene14247	LOC107422243	1.95909	8.49824	12.6439	2.18896	1.36532	1.78735	0.000101595	-2.10725876208805	down	[C]	Energy production and conversion	--	--	--	Probable aldo-keto reductase 2 OS=Oryza sativa subsp. indica (Rice) PE=3 SV=1	C	Energy production and conversion	PREDICTED: probable aldo-keto reductase 2 [Prunus mume]
gene16210	LOC107424406	27.5389	29.0838	143.951	13.5873	15.0203	17.8547	2.6944e-05	-2.12355723532436	down	[Q]	Secondary metabolites biosynthesis, transport and catabolism	Molecular Function: monooxygenase activity (GO:0004497);; Molecular Function: iron ion binding (GO:0005506);; Molecular Function: electron carrier activity (GO:0009055);; Molecular Function: oxidoreductase activity, acting on paired donors, with incorporation or reduction of molecular oxygen (GO:0016705);; Molecular Function: heme binding (GO:0020037);; Biological Process: oxidation-reduction pro…	K09755|0|fve:101307828|cytochrome P450 84A1-like; K09755 ferulate-5-hydroxylase [EC:1.14.-.-] (A)	Phenylpropanoid biosynthesis (ko00940)	Cytochrome P450 84A1 GN=F23E13.110 OS=Arabidopsis thaliana (Mouse-ear cress) PE=1 SV=1	Q	Secondary metabolites biosynthesis, transport and catabolism	PREDICTED: cytochrome P450 84A1-like [Fragaria vesca subsp. vesca]
gene11648	LOC107419366	0.196406	0.763339	1.42624	0.177872	0.134079	0.157058	0.000231023	-2.13225118554619	down	[Z]	Cytoskeleton	Cellular Component: microtubule cytoskeleton (GO:0015630);; Cellular Component: protein complex (GO:0043234);; Cellular Component: cytoskeletal part (GO:0044430);; Molecular Function: organic cyclic compound binding (GO:0097159);; Molecular Function: heterocyclic compound binding (GO:1901363);;	K10406|0|pmum:103323967|kinesin-like protein KIF22 (A)	--	Kinesin-4 GN=F2P16.12 OS=Arabidopsis thaliana (Mouse-ear cress) PE=1 SV=2	Z	Cytoskeleton	PREDICTED: kinesin-like protein KIF22 [Prunus mume]
gene21367	LOC107429921	15.1938	26.7953	33.0528	4.85874	5.67079	6.34614	6.02503e-12	-2.15182913865192	down	--	--	Biological Process: metabolic process (GO:0008152);; Molecular Function: transferase activity, transferring hexosyl groups (GO:0016758);;	--	--	UDP-glycosyltransferase 73B5 GN=UGT73B5 OS=Arabidopsis thaliana (Mouse-ear cress) PE=2 SV=1	CG	Energy production and conversion;; Carbohydrate transport and metabolism	PREDICTED: UDP-glycosyltransferase 73B4-like [Populus euphratica]
gene12514	LOC107420324	1.21612	2.86015	9.78244	1.25634	0.765159	1.10222	0.000579436	-2.15818730365686	down	--	--	--	--	--	--	S	Function unknown	PREDICTED: uncharacterized protein LOC103441769 [Malus domestica]
gene28523	LOC107405035	1.13634	1.41725	2.83373	0.0679096	0.474509	0.705873	0.000488223	-2.16232648587827	down	--	--	Molecular Function: enzyme inhibitor activity (GO:0004857);; Cellular Component: cell wall (GO:0005618);; Molecular Function: pectinesterase activity (GO:0030599);; Biological Process: cell wall modification (GO:0042545);; Biological Process: negative regulation of catalytic activity (GO:0043086);; Molecular Function: aspartyl esterase activity (GO:0045330);; Biological Process: pectin catabolic …	K01051|0|pop:POPTR_0002s20370g|POPTRDRAFT_799194; hypothetical protein; K01051 pectinesterase [EC:3.1.1.11] (A)	Pentose and glucuronate interconversions (ko00040);; Starch and sucrose metabolism (ko00500)	Pectinesterase 40 (Precursor) GN=T14P8.1 OS=Arabidopsis thaliana (Mouse-ear cress) PE=2 SV=1	G	Carbohydrate transport and metabolism	PREDICTED: pectinesterase-like [Populus euphratica]
gene9481	LOC107417005	3.26292	26.1206	37.7601	4.97034	2.75205	7.40054	0.000497595	-2.16249983969503	down	--	--	Cellular Component: membrane (GO:0016020);; Biological Process: regulation of defense response (GO:0031347);; Biological Process: innate immune response (GO:0045087);; Biological Process: regulation of cellular process (GO:0050794);; Biological Process: response to other organism (GO:0051707);; Biological Process: cellular response to stimulus (GO:0051716);;	--	--	Cytochrome b561 and DOMON domain-containing protein At5g47530 (Precursor) GN=At5g47530 OS=Arabidopsis thaliana (Mouse-ear cress) PE=2 SV=1	T	Signal transduction mechanisms	Auxin-responsive family protein, putative [Theobroma cacao]
gene10022	LOC107417569	90.0788	127.064	380.259	61.7405	36.99	33.2726	4.0711e-07	-2.16818532543069	down	[I]	Lipid transport and metabolism	Biological Process: pentacyclic triterpenoid biosynthetic process (GO:0019745);; Molecular Function: lupeol synthase activity (GO:0042299);;	--	--	Lupeol synthase GN=OSCBPW OS=Betula platyphylla (Asian white birch) PE=1 SV=1	I	Lipid transport and metabolism	Beta-Amyrin Synthase isoform 2 [Theobroma cacao]
gene13622	LOC107421567	5.60974	15.0754	55.5308	3.63734	6.87863	6.27651	0.000292952	-2.18630977853677	down	--	--	--	--	--	--	S	Function unknown	Uncharacterized protein isoform 4, partial [Theobroma cacao]
gene10283	LOC107417841	4.21423	7.55981	18.1885	2.19856	2.07591	2.60565	1.2013e-06	-2.18681679922744	down	[Q]	Secondary metabolites biosynthesis, transport and catabolism	Molecular Function: oxidoreductase activity (GO:0016491);; Molecular Function: metal ion binding (GO:0046872);;	--	--	Geraniol 8-hydroxylase GN=CYP76B10 OS=Swertia mussotii (Felwort) PE=1 SV=1	Q	Secondary metabolites biosynthesis, transport and catabolism	hypothetical protein PRUPE_ppa004606mg [Prunus persica]
gene29690	LOC107406287	5.36722	9.94246	7.93082	0.668827	2.0971	2.32259	2.17482e-06	-2.20639090302439	down	--	--	Molecular Function: iron ion binding (GO:0005506);; Molecular Function: electron carrier activity (GO:0009055);; Molecular Function: trans-cinnamate 4-monooxygenase activity (GO:0016710);; Molecular Function: heme binding (GO:0020037);; Biological Process: oxidation-reduction process (GO:0055114);;	K00487|5.58185e-179|tcc:TCM_045554|Cinnamate-4-hydroxylase; K00487 trans-cinnamate 4-monooxygenase [EC:1.14.13.11] (A)	Ubiquinone and other terpenoid-quinone biosynthesis (ko00130);; Phenylalanine metabolism (ko00360);; Phenylpropanoid biosynthesis (ko00940);; Flavonoid biosynthesis (ko00941);; Stilbenoid, diarylheptanoid and gingerol biosynthesis (ko00945);; Degradation of aromatic compounds (ko01220)	Trans-cinnamate 4-monooxygenase GN=CYP73A4 OS=Catharanthus roseus (Madagascar periwinkle) PE=2 SV=1	Q	Secondary metabolites biosynthesis, transport and catabolism	Cytochrome P450 protein [Gossypium arboreum]
gene8591	LOC107416031	4.22191	11.8916	21.7041	2.18295	2.14289	3.81886	4.1705e-06	-2.21806489483996	down	[RTKL]	General function prediction only;; Signal transduction mechanisms;; Transcription;; Replication, recombination and repair	--	--	--	Probable receptor-like protein kinase At1g67000 (Precursor) GN=At1g67000 OS=Arabidopsis thaliana (Mouse-ear cress) PE=2 SV=2	T	Signal transduction mechanisms	PREDICTED: probable receptor-like protein kinase At1g67000 [Prunus mume]
gene10741	LOC107418385	0.679484	1.38803	1.24796	0.317858	0.29984	0.108211	1.05667e-05	-2.24062137529986	down	[RTKL]	General function prediction only;; Signal transduction mechanisms;; Transcription;; Replication, recombination and repair	Molecular Function: protein kinase activity (GO:0004672);; Biological Process: phosphorylation (GO:0016310);;	--	--	Cysteine-rich receptor-like protein kinase 42 (Precursor) GN=CRK42 OS=Arabidopsis thaliana (Mouse-ear cress) PE=2 SV=1	T	Signal transduction mechanisms	PREDICTED: cysteine-rich receptor-like protein kinase 1 [Prunus mume]
gene13025	LOC107420911	5.68658	12.7684	30.851	3.86128	3.75641	2.86135	7.16277e-07	-2.2428890054832	down	[RTKL]	General function prediction only;; Signal transduction mechanisms;; Transcription;; Replication, recombination and repair	Biological Process: activation of MAPKK activity (GO:0000186);; Molecular Function: MAP kinase kinase kinase activity (GO:0004709);; Molecular Function: ATP binding (GO:0005524);; Cellular Component: plasma membrane (GO:0005886);; Cellular Component: integral component of membrane (GO:0016021);; Molecular Function: 2-alkenal reductase [NAD(P)] activity (GO:0032440);; Biological Process: oxidation…	--	--	Receptor-like protein kinase HSL1 (Precursor) GN=HSL1 OS=Arabidopsis thaliana (Mouse-ear cress) PE=2 SV=1	T	Signal transduction mechanisms	PREDICTED: receptor-like protein kinase HSL1 [Prunus mume]
gene10316	LOC107417885	5.64023	17.725	34.0135	4.35271	4.12716	3.61151	2.15092e-06	-2.2442445313747	down	[P]	Inorganic ion transport and metabolism	Molecular Function: nucleotide binding (GO:0000166);; Molecular Function: monooxygenase activity (GO:0004497);; Molecular Function: coenzyme binding (GO:0050662);;	--	--	Flavin-containing monooxygenase FMO GS-OX-like 2 GN=At1g12200 OS=Arabidopsis thaliana (Mouse-ear cress) PE=2 SV=1	Q	Secondary metabolites biosynthesis, transport and catabolism	Flavin-containing monooxygenase FMO GS-OX-like 3 [Morus notabilis]
gene20862	LOC107429366	2.92249	4.01259	9.02632	1.56285	0.816693	0.969827	5.35544e-06	-2.25077126490225	down	[Q]	Secondary metabolites biosynthesis, transport and catabolism	Molecular Function: binding (GO:0005488);; Molecular Function: oxidoreductase activity (GO:0016491);;	--	--	Beta-amyrin 28-oxidase OS=Panax ginseng (Korean ginseng) PE=2 SV=1	Q	Secondary metabolites biosynthesis, transport and catabolism	PREDICTED: cytochrome P450 716B2-like [Fragaria vesca subsp. vesca]
gene16732	LOC107424909	8.62967	14.8593	34.3641	3.59362	3.99111	4.5339	4.88726e-07	-2.25728867408191	down	--	--	Molecular Function: peroxidase activity (GO:0004601);; Biological Process: response to oxidative stress (GO:0006979);; Molecular Function: heme binding (GO:0020037);; Molecular Function: metal ion binding (GO:0046872);; Biological Process: oxidation-reduction process (GO:0055114);;	K00430|0|rcu:RCOM_0578390|Peroxidase 73 precursor, putative (EC:1.11.1.7); K00430 peroxidase [EC:1.11.1.7] (A)	Phenylalanine metabolism (ko00360);; Phenylpropanoid biosynthesis (ko00940)	Peroxidase 51 (Precursor) OS=Arabidopsis thaliana (Mouse-ear cress) PE=2 SV=1	G	Carbohydrate transport and metabolism	Peroxidase 73 precursor, putative [Ricinus communis]
gene30630	LOC107407295	0.909559	1.87019	1.08432	0.0388643	0.472623	0.29927	0.000160876	-2.26704649481105	down	--	--	Molecular Function: peptidase activity (GO:0008233);;	--	--	Protein ASPARTIC PROTEASE IN GUARD CELL 1 (Precursor) GN=ASPG1 OS=Arabidopsis thaliana (Mouse-ear cress) PE=1 SV=1	O	Posttranslational modification, protein turnover, chaperones	Aspartic proteinase nepenthesin-2 precursor, putative [Ricinus communis]
gene7752	LOC107415104	10.4093	13.5497	62.2102	6.16479	5.8105	5.77301	2.75786e-05	-2.26717642844369	down	--	--	Molecular Function: peroxidase activity (GO:0004601);; Cellular Component: vacuole (GO:0005773);; Cellular Component: plasma membrane (GO:0005886);; Biological Process: response to oxidative stress (GO:0006979);; Biological Process: response to light stimulus (GO:0009416);; Cellular Component: plant-type cell wall (GO:0009505);; Biological Process: response to salt stress (GO:0009651);; Biologica…	K00430|2.31488e-159|pxb:103964015|peroxidase A2-like; K00430 peroxidase [EC:1.11.1.7] (A)	Phenylalanine metabolism (ko00360);; Phenylpropanoid biosynthesis (ko00940)	Peroxidase 15 {ECO:0000303|PubMed:17936696} (Precursor) OS=Ipomoea batatas (Sweet potato) PE=1 SV=1	G	Carbohydrate transport and metabolism	PREDICTED: peroxidase A2-like [Pyrus x bretschneideri]
gene20204	LOC107428716	128.379	240.654	469.199	59.2273	54.2981	60.2965	2.00153e-10	-2.26803285131003	down	[C]	Energy production and conversion	--	K01648|0|fve:101307981|ATP-citrate synthase alpha chain protein 1-like; K01648 ATP citrate (pro-S)-lyase [EC:2.3.3.8] (A)	Citrate cycle (TCA cycle) (ko00020)	ATP-citrate synthase alpha chain protein 1 GN=ACLA-1 OS=Arabidopsis thaliana (Mouse-ear cress) PE=1 SV=1	C	Energy production and conversion	PREDICTED: ATP-citrate synthase alpha chain protein 1-like [Fragaria vesca subsp. vesca]
gene10802	LOC107418476	2.70373	21.9586	1.08356	0	0.987399	4.40303	0.0375151	-2.27730244394447	down	--	--	--	--	--	Snakin-2 (Precursor) GN=SN2 OS=Solanum tuberosum (Potato) PE=1 SV=1	R	General function prediction only	hypothetical protein PRUPE_ppa019204mg [Prunus persica]
gene2740	LOC107403782	3.41453	24.2082	54.4376	3.0042	5.83505	7.97119	0.000570099	-2.28202698027237	down	--	--	Molecular Function: inorganic diphosphatase activity (GO:0004427);; Biological Process: cellular response to phosphate starvation (GO:0016036);; Biological Process: dephosphorylation (GO:0016311);; Molecular Function: phosphatase activity (GO:0016791);; Biological Process: protein tetramerization (GO:0051262);;	K13248|3.38806e-169|pper:PRUPE_ppa009904mg|hypothetical protein; K13248 pyridoxal phosphate phosphatase PHOSPHO2 [EC:3.1.3.74] (A)	Vitamin B6 metabolism (ko00750)	Inorganic pyrophosphatase 1 GN=PS2 OS=Arabidopsis thaliana (Mouse-ear cress) PE=1 SV=1	R	General function prediction only	hypothetical protein PRUPE_ppa009904mg [Prunus persica]
gene1708	LOC107425621	63.6453	163.396	393.587	42.3309	39.9416	46.3225	3.86069e-07	-2.2892121969415	down	[I]	Lipid transport and metabolism	Molecular Function: hydroxymethylglutaryl-CoA reductase (NADPH) activity (GO:0004420);; Biological Process: isoprenoid biosynthetic process (GO:0008299);; Biological Process: coenzyme A metabolic process (GO:0015936);; Cellular Component: integral component of membrane (GO:0016021);; Molecular Function: NADP binding (GO:0050661);; Biological Process: oxidation-reduction process (GO:0055114);;	K00021|0|pmum:103334636|3-hydroxy-3-methylglutaryl-coenzyme A reductase 1; K00021 hydroxymethylglutaryl-CoA reductase (NADPH) [EC:1.1.1.34] (A)	Terpenoid backbone biosynthesis (ko00900)	3-hydroxy-3-methylglutaryl-coenzyme A reductase 2 GN=HMG2 OS=Gossypium hirsutum (Upland cotton) PE=3 SV=1	I	Lipid transport and metabolism	PREDICTED: 3-hydroxy-3-methylglutaryl-coenzyme A reductase 1 [Prunus mume]
gene22108	LOC107430733	16.9965	63.0277	91.1346	9.38836	4.54072	20.608	4.09745e-05	-2.30040129905529	down	--	--	--	--	--	--	S	Function unknown	hypothetical protein L484_023627 [Morus notabilis]
jujube_newGene_351	--	0.487528	0.306917	3.75312	0.431374	0.233335	0.262683	0.00185679	-2.31186238091504	down	--	--	--	--	--	Endonuclease OS=Nicotiana tabacum (Common tobacco) PE=2 SV=1	R	General function prediction only	PREDICTED: retrovirus-related Pol polyprotein from transposon TNT 1-94 [Malus domestica]
gene3305	LOC107410289	6.04519	23.7783	71.4422	6.49944	5.11534	8.88408	0.000101285	-2.32558609793714	down	[E]	Amino acid transport and metabolism	Molecular Function: prephenate dehydratase activity (GO:0004664);; Cellular Component: cytosol (GO:0005829);; Biological Process: tyrosine biosynthetic process (GO:0006571);; Biological Process: L-phenylalanine biosynthetic process (GO:0009094);; Cellular Component: chloroplast (GO:0009507);; Biological Process: response to low fluence blue light stimulus by blue low-fluence system (GO:0010244);;…	K05359|0|rcu:RCOM_1187000|prephenate dehydratase, putative (EC:4.2.1.51); K05359 arogenate/prephenate dehydratase [EC:4.2.1.91 4.2.1.51] (A)	Phenylalanine, tyrosine and tryptophan biosynthesis (ko00400);; Biosynthesis of amino acids (ko01230)	Arogenate dehydratase/prephenate dehydratase 6, chloroplastic (Precursor) GN=T23G18.10 OS=Arabidopsis thaliana (Mouse-ear cress) PE=1 SV=1	E	Amino acid transport and metabolism	prephenate dehydratase, putative [Ricinus communis]
gene7004	LOC107414315	10.5163	18.2897	55.8403	7.2326	5.55066	4.02891	1.0048e-05	-2.3298177361032	down	--	--	--	--	--	Alpha-amylase/subtilisin inhibitor (Precursor) GN=OSJNBa0038O10.14 OS=Oryza sativa subsp. japonica (Rice) PE=1 SV=2	R	General function prediction only	PREDICTED: alpha-amylase/subtilisin inhibitor-like [Prunus mume]
gene17047	LOC107425239	5.01401	13.7393	33.8918	3.20586	4.04676	3.24778	3.12679e-05	-2.33509848290433	down	--	--	--	--	--	--	S	Function unknown	hypothetical protein L484_013472 [Morus notabilis]
gene13994	LOC107421938	8.88865	35.6515	76.1462	7.95462	6.46394	9.86543	5.73371e-06	-2.33908858685249	down	[V]	Defense mechanisms	Molecular Function: ATP binding (GO:0005524);; Biological Process: ATP catabolic process (GO:0006200);; Molecular Function: xenobiotic-transporting ATPase activity (GO:0008559);; Molecular Function: taurine-transporting ATPase activity (GO:0015411);; Cellular Component: integral component of membrane (GO:0016021);; Biological Process: transmembrane transport (GO:0055085);;	K05658|0|tcc:TCM_029573|P-glycoprotein 9 isoform 1; K05658 ATP-binding cassette, subfamily B (MDR/TAP), member 1 [EC:3.6.3.44] (A)	ABC transporters (ko02010)	ABC transporter B family member 9 GN=F15J5.20 OS=Arabidopsis thaliana (Mouse-ear cress) PE=3 SV=2	Q	Secondary metabolites biosynthesis, transport and catabolism	ABC transporter B family member 9 [Morus notabilis]
gene13131	LOC107420984	7.70173	23.6538	49.9258	4.89449	5.67422	5.41518	8.57998e-07	-2.34978876309872	down	--	--	Cellular Component: Golgi apparatus (GO:0005794);; Biological Process: protein glycosylation (GO:0006486);; Molecular Function: galactosyltransferase activity (GO:0008378);; Cellular Component: integral component of membrane (GO:0016021);;	--	--	Beta-1,3-galactosyltransferase 7 OS=Arabidopsis thaliana (Mouse-ear cress) PE=2 SV=1	G	Carbohydrate transport and metabolism	Beta-1,3-galactosyltransferase 7 [Morus notabilis]
gene8100	LOC107415486	5.2653	3.55466	11.8587	0.923856	0.427825	2.63947	0.000164545	-2.35335383938399	down	[O]	Posttranslational modification, protein turnover, chaperones	Cellular Component: vacuole (GO:0005773);; Cellular Component: Golgi apparatus (GO:0005794);; Cellular Component: cytosol (GO:0005829);; Cellular Component: plasma membrane (GO:0005886);; Molecular Function: arsenate reductase (glutaredoxin) activity (GO:0008794);; Molecular Function: electron carrier activity (GO:0009055);; Molecular Function: protein disulfide oxidoreductase activity (GO:001503…	K03676|6.07912e-58|fve:101300837|glutaredoxin-C2-like; K03676 glutaredoxin 3 (A)	--	Glutaredoxin OS=Solanum lycopersicum (Tomato) PE=1 SV=1	O	Posttranslational modification, protein turnover, chaperones	PREDICTED: glutaredoxin [Nicotiana sylvestris]
gene15289	LOC107423373	2.31492	5.70756	5.91777	0.642913	0.584202	1.56404	1.58378e-05	-2.35824440168581	down	--	--	--	--	--	--	S	Function unknown	hypothetical protein L484_013730 [Morus notabilis]
gene17423	LOC107425651	2.28284	4.90973	13.0372	1.34378	1.55347	1.07561	1.22947e-05	-2.36396815070574	down	--	--	--	--	--	U-box domain-containing protein 26 GN=PUB26 OS=Arabidopsis thaliana (Mouse-ear cress) PE=2 SV=1	R	General function prediction only	U-box domain-containing protein 25 [Morus notabilis]
gene17293	LOC107425503	0.560611	4.32681	10.3197	0.642113	0.649612	1.71118	0.00184036	-2.37207328459077	down	--	--	--	--	--	Ethylene-responsive transcription factor RAP2-6 GN=F1I21.18 OS=Arabidopsis thaliana (Mouse-ear cress) PE=2 SV=2	K	Transcription	PREDICTED: ethylene-responsive transcription factor ERF110-like [Prunus mume]
gene21095	LOC107429643	0.237678	0.442618	2.00396	6.7322e-05	0.278236	0.244127	0.0070171	-2.37243524528166	down	[RTKL]	General function prediction only;; Signal transduction mechanisms;; Transcription;; Replication, recombination and repair	Molecular Function: peptide receptor activity (GO:0001653);; Molecular Function: protein serine/threonine kinase activity (GO:0004674);; Molecular Function: ATP binding (GO:0005524);; Biological Process: protein phosphorylation (GO:0006468);; Biological Process: response to wounding (GO:0009611);; Cellular Component: integral component of membrane (GO:0016021);; Molecular Function: 2-alkenal redu…	--	--	Phytosulfokine receptor 1 (Precursor) GN=PSKR OS=Daucus carota (Wild carrot) PE=1 SV=1	T	Signal transduction mechanisms	hypothetical protein PRUPE_ppa000729mg [Prunus persica]
gene2568	LOC107435133	1.08785	4.34009	2.55897	0.313231	0.602896	0.696612	2.69418e-05	-2.37731131399444	down	--	--	Molecular Function: hydrolase activity, acting on ester bonds (GO:0016788);;	--	--	GDSL esterase/lipase 1 (Precursor) GN=GLIP1 OS=Arabidopsis thaliana (Mouse-ear cress) PE=1 SV=1	I	Lipid transport and metabolism	hypothetical protein PRUPE_ppa024154mg [Prunus persica]
gene7779	LOC107415150	11.9181	36.208	75.9996	10.9011	4.48527	8.57098	2.47443e-06	-2.39011063515227	down	--	--	Cellular Component: integral component of membrane (GO:0016021);;	--	--	Lysine histidine transporter 1 GN=LHT1 OS=Arabidopsis thaliana (Mouse-ear cress) PE=1 SV=1	E	Amino acid transport and metabolism	PREDICTED: lysine histidine transporter 1-like [Eucalyptus grandis]
gene10922	LOC107418580	0.560222	2.31706	0.424367	0.622839	0.000697583	0.00048612	0.0266769	-2.39264558818346	down	--	--	--	--	--	Pentatricopeptide repeat-containing protein At1g74900, mitochondrial (Precursor) GN=OTP43 OS=Arabidopsis thaliana (Mouse-ear cress) PE=2 SV=1	S	Function unknown	PREDICTED: pentatricopeptide repeat-containing protein At1g74900, mitochondrial [Prunus mume]
jujube_newGene_1005	--	0.788423	2.15649	2.83362	2.30954e-16	0.230894	0.862203	0.0049712	-2.3986264841287	down	--	--	Molecular Function: nucleotide binding (GO:0000166);; Molecular Function: protein kinase activity (GO:0004672);; Biological Process: signal transduction (GO:0007165);; Biological Process: response to endogenous stimulus (GO:0009719);; Cellular Component: membrane (GO:0016020);; Biological Process: membrane organization (GO:0016044);; Biological Process: phosphorylation (GO:0016310);; Molecular Fu…	--	--	Probable LRR receptor-like serine/threonine-protein kinase At1g74360 (Precursor) GN=At1g74360 OS=Arabidopsis thaliana (Mouse-ear cress) PE=2 SV=1	T	Signal transduction mechanisms	PREDICTED: probable LRR receptor-like serine/threonine-protein kinase At1g74360 [Pyrus x bretschneideri]
gene13710	LOC107421631	0.716375	1.16318	1.64616	0.0698725	0.179343	0.440636	4.92746e-05	-2.40937347696108	down	--	--	Molecular Function: serine-type carboxypeptidase activity (GO:0004185);; Cellular Component: cell wall (GO:0005618);; Biological Process: proteolysis (GO:0006508);;	K16297|0|mdm:103437221|serine carboxypeptidase-like 42; K16297 serine carboxypeptidase-like clade II [EC:3.4.16.-] (A)	--	Serine carboxypeptidase-like 42 (Precursor) GN=SCPL42 OS=Arabidopsis thaliana (Mouse-ear cress) PE=2 SV=1	O	Posttranslational modification, protein turnover, chaperones	PREDICTED: serine carboxypeptidase-like 42 [Malus domestica]
gene21709	LOC107430299	1.33353	1.81637	2.26559	0.267434	0.185205	0.386968	1.49862e-05	-2.43278089120819	down	--	--	Molecular Function: trehalose-phosphatase activity (GO:0004805);; Biological Process: trehalose biosynthetic process (GO:0005992);;	K01087|5.28968e-80|pper:PRUPE_ppa014788mg|hypothetical protein; K01087 trehalose 6-phosphate phosphatase [EC:3.1.3.12] (A)	Starch and sucrose metabolism (ko00500)	Probable trehalose-phosphate phosphatase G GN=F7K2.170 OS=Arabidopsis thaliana (Mouse-ear cress) PE=2 SV=1	G	Carbohydrate transport and metabolism	hypothetical protein PRUPE_ppa014788mg [Prunus persica]
gene15893	LOC107424028	0.907641	2.96815	5.56597	0.647614	0.45424	0.652379	7.12877e-06	-2.43362895386867	down	[RTKL]	General function prediction only;; Signal transduction mechanisms;; Transcription;; Replication, recombination and repair	--	--	--	Probable LRR receptor-like serine/threonine-protein kinase At4g29180 (Precursor) GN=At4g29180 OS=Arabidopsis thaliana (Mouse-ear cress) PE=2 SV=2	T	Signal transduction mechanisms	PREDICTED: probable LRR receptor-like serine/threonine-protein kinase At4g29180 [Prunus mume]
gene2205	LOC107431218	0.843155	4.72214	10.791	0.495983	1.13441	0.85276	0.00020775	-2.44726998653999	down	--	--	Biological Process: metabolic process (GO:0008152);; Molecular Function: terpene synthase activity (GO:0010333);; Molecular Function: metal ion binding (GO:0046872);;	K15803|2.00147e-180|vvi:100232954|(-)-germacrene D synthase (EC:4.2.3.22 4.2.3.75); K15803 (-)-germacrene D synthase [EC:4.2.3.22 4.2.3.75] (A)	Sesquiterpenoid and triterpenoid biosynthesis (ko00909)	(-)-germacrene D synthase OS=Vitis vinifera (Grape) PE=1 SV=1	R	General function prediction only	unnamed protein product [Vitis vinifera]
gene3123	LOC107408651	3.4383	13.5814	19.1488	2.47184	2.05896	2.05957	4.42296e-07	-2.45734800800246	down	[MG]	Cell wall/membrane/envelope biogenesis;; Carbohydrate transport and metabolism	Molecular Function: cinnamoyl-CoA reductase activity (GO:0016621);; Biological Process: cellular metabolic process (GO:0044237);; Molecular Function: dihydrokaempferol 4-reductase activity (GO:0045552);; Molecular Function: coenzyme binding (GO:0050662);; Biological Process: oxidation-reduction process (GO:0055114);;	K09753|1.3545e-176|tcc:TCM_027422|Cinnamoyl coa reductase 1 isoform 1; K09753 cinnamoyl-CoA reductase [EC:1.2.1.44] (A)	Phenylpropanoid biosynthesis (ko00940)	Cinnamoyl-CoA reductase 1 GN=T24D18.5 OS=Arabidopsis thaliana (Mouse-ear cress) PE=1 SV=1	Q	Secondary metabolites biosynthesis, transport and catabolism	cinnamoyl-CoA reductase [Hevea brasiliensis]
gene5313	LOC107412454	429.794	619.083	2587.59	432.745	136.215	95.8808	6.02209e-05	-2.4587881580576	down	--	--	Biological Process: metabolic process (GO:0008152);; Molecular Function: hydrolase activity, acting on glycosyl bonds (GO:0016798);;	--	--	Glucan endo-1,3-beta-glucosidase major form (Precursor) GN=HGN1 OS=Hevea brasiliensis (Para rubber tree) PE=1 SV=2	R	General function prediction only	unknown [Populus trichocarpa]
gene15746	LOC107423860	0.928414	4.63007	5.47573	1.41693	0.36131	0.283688	0.000230326	-2.47023237952628	down	--	--	Biological Process: very long-chain fatty acid metabolic process (GO:0000038);; Cellular Component: endoplasmic reticulum (GO:0005783);; Biological Process: response to wounding (GO:0009611);; Biological Process: coumarin biosynthetic process (GO:0009805);; Molecular Function: fatty acid elongase activity (GO:0009922);; Biological Process: wax biosynthetic process (GO:0010025);; Cellular Componen…	K15397|0|tcc:TCM_005053|3-ketoacyl-CoA synthase 1; K15397 3-ketoacyl-CoA synthase [EC:2.3.1.199] (A)	Fatty acid elongation (ko00062)	3-ketoacyl-CoA synthase 1 GN=T25K16.11 OS=Arabidopsis thaliana (Mouse-ear cress) PE=2 SV=1	I	Lipid transport and metabolism	3-ketoacyl-CoA synthase 1 [Theobroma cacao]
gene2422	LOC107433412	20.0704	145.13	281.213	30.0188	18.2435	31.4594	3.94603e-05	-2.48095638251103	down	--	--	--	--	--	Receptor-like protein 12 (Precursor) GN=RLP12 OS=Arabidopsis thaliana (Mouse-ear cress) PE=2 SV=2	R	General function prediction only	Receptor like protein 6, putative [Theobroma cacao]
gene15764	LOC107423912	5.31709	27.8291	159.687	10.1488	6.90641	17.0941	0.0013363	-2.49393716026266	down	[C]	Energy production and conversion	Cellular Component: peroxisome (GO:0005777);; Biological Process: tryptophan catabolic process (GO:0006569);; Biological Process: response to water deprivation (GO:0009414);; Biological Process: response to wounding (GO:0009611);; Biological Process: indoleacetic acid biosynthetic process (GO:0009684);; Biological Process: jasmonic acid biosynthetic process (GO:0009695);; Biological Process: resp…	K05894|0|pxb:103951930|12-oxophytodienoate reductase 3; K05894 12-oxophytodienoic acid reductase [EC:1.3.1.42] (A)	alpha-Linolenic acid metabolism (ko00592)	12-oxophytodienoate reductase 3 GN=OPR3 OS=Solanum lycopersicum (Tomato) PE=1 SV=1	C	Energy production and conversion	PREDICTED: 12-oxophytodienoate reductase 3 [Pyrus x bretschneideri]
gene12194	LOC107419989	1.56361	5.57403	8.64054	0.693487	0.820734	1.27913	4.14076e-06	-2.49444600749145	down	--	--	--	--	--	Uncharacterized acetyltransferase At3g50280 GN=At3g50280 OS=Arabidopsis thaliana (Mouse-ear cress) PE=3 SV=1	S	Function unknown	PREDICTED: uncharacterized acetyltransferase At3g50280-like [Vitis vinifera]
gene18778	LOC107427101	76.0746	367.33	671.181	106.311	58.6087	35.0347	1.11748e-05	-2.5134585550011	down	[S]	Function unknown	Cellular Component: extracellular region (GO:0005576);;	K13449|1.88855e-91|cit:102627194|pathogenesis-related protein 1-like; K13449 pathogenesis-related protein 1 (A)	Plant hormone signal transduction (ko04075);; Plant-pathogen interaction (ko04626)	Pathogenesis-related protein 1 (Precursor) GN=At2g14610 OS=Arabidopsis thaliana (Mouse-ear cress) PE=1 SV=1	S	Function unknown	PREDICTED: pathogenesis-related protein 1-like [Citrus sinensis]
gene20686	LOC107429207	1.34033	2.94864	10.309	0.816176	0.764567	0.952323	1.39537e-05	-2.52859187702398	down	[RTKL]	General function prediction only;; Signal transduction mechanisms;; Transcription;; Replication, recombination and repair	--	--	--	G-type lectin S-receptor-like serine/threonine-protein kinase RLK1 (Precursor) GN=RLK1 OS=Arabidopsis thaliana (Mouse-ear cress) PE=2 SV=2	T	Signal transduction mechanisms	PREDICTED: G-type lectin S-receptor-like serine/threonine-protein kinase RLK1-like [Glycine max]
gene8088	LOC107415484	0.784473	4.20103	3.196	0.618016	0.3973	0.186772	0.000309026	-2.53757886112939	down	--	--	Biological Process: metabolic process (GO:0008152);; Molecular Function: galactinol-raffinose galactosyltransferase activity (GO:0047268);; Molecular Function: galactinol-sucrose galactosyltransferase activity (GO:0047274);;	K06617|0|tcc:TCM_016942|Raffinose synthase family protein; K06617 raffinose synthase [EC:2.4.1.82] (A)	Galactose metabolism (ko00052)	Probable galactinol--sucrose galactosyltransferase 5 OS=Arabidopsis thaliana (Mouse-ear cress) PE=1 SV=1	R	General function prediction only	hypothetical protein L484_020545 [Morus notabilis]
gene5086	LOC107412153	23.3769	99.7567	72.7605	21.0716	7.70712	5.93145	8.54099e-07	-2.5437129273503	down	--	--	Cellular Component: extracellular region (GO:0005576);; Cellular Component: cell wall (GO:0005618);; Molecular Function: chitin binding (GO:0008061);; Biological Process: defense response to bacterium (GO:0042742);; Biological Process: defense response to fungus (GO:0050832);;	--	--	Pathogenesis-related protein PR-4B (Precursor) OS=Nicotiana tabacum (Common tobacco) PE=2 SV=1	R	General function prediction only	PREDICTED: pathogenesis-related protein PR-4 [Prunus mume]
gene28760	LOC107405279	1.58305	8.00314	9.10664	1.2204	1.15701	1.12965	3.0955e-06	-2.54416503454871	down	--	--	--	--	--	Thaumatin-like protein (Precursor) GN=tlp OS=Actinidia deliciosa (Kiwi) PE=1 SV=2	R	General function prediction only	PREDICTED: thaumatin-like protein [Eucalyptus grandis]
gene19560	LOC107428003	14.9755	26.5286	59.018	9.15247	4.55032	3.68514	3.72682e-08	-2.55713529801104	down	--	--	Biological Process: flavonoid biosynthetic process (GO:0009813);; Molecular Function: naringenin-chalcone synthase activity (GO:0016210);;	K00660|0|tcc:TCM_017370|Chalcone and stilbene synthase family protein; K00660 chalcone synthase [EC:2.3.1.74] (A)	Flavonoid biosynthesis (ko00941);; Circadian rhythm - plant (ko04712)	Chalcone synthase GN=CHS OS=Betula pendula (European white birch) PE=2 SV=2	H	Coenzyme transport and metabolism	Chalcone and stilbene synthase family protein [Theobroma cacao]
gene9373	LOC107416878	258.964	514.381	147.947	10.2357	39.6862	102.036	3.09996e-05	-2.57589589002789	down	[G]	Carbohydrate transport and metabolism	Molecular Function: hydrolase activity, hydrolyzing O-glycosyl compounds (GO:0004553);; Cellular Component: cell wall (GO:0005618);; Biological Process: cellular glucan metabolic process (GO:0006073);; Biological Process: regulation of meristem growth (GO:0010075);; Molecular Function: xyloglucan:xyloglucosyl transferase activity (GO:0016762);; Cellular Component: apoplast (GO:0048046);;	K08235|7.41177e-151|pop:POPTR_0019s14590g|POPTRDRAFT_915608; Xyloglucan endotransglucosylase/hydrolase protein 9 precursor; K08235 xyloglucan:xyloglucosyl transferase [EC:2.4.1.207] (A)	--	Xyloglucan endotransglucosylase/hydrolase protein 9 (Precursor) GN=F4C21.14 OS=Arabidopsis thaliana (Mouse-ear cress) PE=2 SV=2	R	General function prediction only	Xyloglucan endotransglucosylase/hydrolase protein 9 precursor [Populus trichocarpa]
gene12265	LOC107420056	2.63555	8.12563	16.2172	1.44033	0.946814	2.06938	2.05083e-06	-2.58610592935954	down	--	--	--	--	--	Fatty-acid-binding protein 2 GN=FAP2 OS=Arabidopsis thaliana (Mouse-ear cress) PE=2 SV=2	S	Function unknown	PREDICTED: fatty-acid-binding protein 2 isoform X1 [Prunus mume]
gene2373	LOC107432913	1.04358	1.289	6.85442	0.336785	0.351714	0.819518	0.00022987	-2.59259659685495	down	--	--	--	--	--	--	S	Function unknown	PREDICTED: uncharacterized protein LOC103326446 isoform X2 [Prunus mume]
gene15979	LOC107424139	1.12241	11.4486	18.9019	1.26172	1.22571	2.77433	0.000147718	-2.59275860427166	down	--	--	--	--	--	--	S	Function unknown	PREDICTED: uncharacterized protein LOC103450521 [Malus domestica]
gene17834	LOC107426107	6.35684	2.54619	0.624633	0.747047	0	0.834348	0.00309258	-2.60846445963607	down	--	--	--	K13508|0|pop:POPTR_0002s19350g|POPTRDRAFT_755676; hypothetical protein; K13508 glycerol-3-phosphate acyltransferase [EC:2.3.1.15] (A)	Glycerolipid metabolism (ko00561);; Glycerophospholipid metabolism (ko00564)	Probable glycerol-3-phosphate acyltransferase 3 GN=GPAT3 OS=Arabidopsis thaliana (Mouse-ear cress) PE=2 SV=1	I	Lipid transport and metabolism	PREDICTED: probable glycerol-3-phosphate acyltransferase 3-like [Citrus sinensis]
gene24871	LOC107433775	1.84935	4.54407	10.9068	1.07983	0.481255	1.30748	3.17815e-05	-2.61804154866097	down	[QR]	Secondary metabolites biosynthesis, transport and catabolism;; General function prediction only	Cellular Component: mitochondrion (GO:0005739);; Molecular Function: methyltransferase activity (GO:0008168);; Biological Process: methylation (GO:0032259);; Biological Process: response to cadmium ion (GO:0046686);;	--	--	--	R	General function prediction only	Putative methyltransferase [Morus notabilis]
gene21712	LOC107430320	0.791177	5.20415	7.65921	0.832648	0.456799	0.955871	0.000102523	-2.62817605856447	down	--	--	--	--	--	--	S	Function unknown	hypothetical protein VITISV_001086 [Vitis vinifera]
gene24181	LOC107433008	0.725253	1.35281	3.56482	0.189763	0.364285	0.394224	1.41927e-05	-2.63084478439272	down	[KAD]	Transcription;; RNA processing and modification;; Cell cycle control, cell division, chromosome partitioning	--	K09422|2.75817e-128|pop:POPTR_0019s05740g|POPTRDRAFT_573987; hypothetical protein; K09422 myb proto-oncogene protein, plant (A)	--	Transcription factor MYB44 GN=K8K14.2 OS=Arabidopsis thaliana (Mouse-ear cress) PE=2 SV=1	K	Transcription	PREDICTED: transcription factor TT2-like [Populus euphratica]
gene8003	LOC107415429	0.503386	5.22548	1.1837	0.266225	0.0681081	0.786478	0.0017777	-2.63370948643098	down	--	--	--	--	--	Senescence-associated carboxylesterase 101 (Precursor) GN=SAG101 OS=Arabidopsis thaliana (Mouse-ear cress) PE=1 SV=1	S	Function unknown	hypothetical protein PRUPE_ppa015494mg [Prunus persica]
gene12153	LOC107419922	6.48938	26.4866	13.8452	0.540562	1.83249	5.25626	8.22247e-05	-2.63554192013908	down	--	--	--	--	--	Snakin-2 (Precursor) GN=SN2 OS=Solanum tuberosum (Potato) PE=1 SV=1	R	General function prediction only	hypothetical protein L484_027833 [Morus notabilis]
gene5631	LOC107412809	40.1071	49.6306	87.237	12.1132	8.19939	8.19305	2.31114e-17	-2.64047818133951	down	[I]	Lipid transport and metabolism	Molecular Function: carboxylic ester hydrolase activity (GO:0004091);; Biological Process: metabolic process (GO:0008152);; Molecular Function: retinyl-palmitate esterase activity (GO:0050253);; Molecular Function: methyl indole-3-acetate esterase activity (GO:0080030);; Molecular Function: methyl salicylate esterase activity (GO:0080031);; Molecular Function: methyl jasmonate esterase activity (…	--	--	Probable carboxylesterase 17 GN=CXE17 OS=Arabidopsis thaliana (Mouse-ear cress) PE=2 SV=1	V	Defense mechanisms	hypothetical protein JCGZ_24569 [Jatropha curcas]
gene24445	LOC107433316	4.08986	12.0579	17.7164	2.52741	1.5097	1.32952	7.26947e-08	-2.65100998524997	down	[FJ]	Nucleotide transport and metabolism;; Translation, ribosomal structure and biogenesis	Cellular Component: cytosol (GO:0005829);; Biological Process: metabolic process (GO:0008152);; Molecular Function: zinc ion binding (GO:0008270);; Molecular Function: hydrolase activity (GO:0016787);;	--	--	tRNA(adenine(34)) deaminase, chloroplastic (Precursor) GN=TADA OS=Arabidopsis thaliana (Mouse-ear cress) PE=1 SV=1	F	Nucleotide transport and metabolism	PREDICTED: tRNA(adenine(34)) deaminase, chloroplastic-like [Elaeis guineensis]
gene32506	LOC107409332	5.74733	6.71897	54.0789	1.7665	4.10199	4.18595	0.000130862	-2.65128831019954	down	[G]	Carbohydrate transport and metabolism	Cellular Component: cytosol (GO:0005829);; Biological Process: glycogen biosynthetic process (GO:0005978);; Molecular Function: glucose-1-phosphate adenylyltransferase activity (GO:0008878);; Cellular Component: chloroplast (GO:0009507);; Cellular Component: glucose-1-phosphate adenylyltransferase complex (GO:0010170);; Biological Process: starch biosynthetic process (GO:0019252);;	K00975|8.55843e-148|vvi:100253688|glucose-1-phosphate adenylyltransferase large subunit 1; K00975 glucose-1-phosphate adenylyltransferase [EC:2.7.7.27] (A)	Starch and sucrose metabolism (ko00500);; Amino sugar and nucleotide sugar metabolism (ko00520)	Glucose-1-phosphate adenylyltransferase large subunit 3, chloroplastic (Precursor) GN=APL3 OS=Arabidopsis thaliana (Mouse-ear cress) PE=2 SV=2	M	Cell wall/membrane/envelope biogenesis	Glucose-1-phosphate adenylyltransferase large subunit 3 [Morus notabilis]
gene18715	LOC107427038	0.814259	2.89704	7.26667	0.597482	0.225951	0.922131	0.000103878	-2.6675294204058	down	[GC]	Carbohydrate transport and metabolism;; Energy production and conversion	Molecular Function: transferase activity, transferring hexosyl groups (GO:0016758);;	--	--	UDP-glucose flavonoid 3-O-glucosyltransferase 7 {ECO:0000303|PubMed:18487633} OS=Fragaria ananassa (Strawberry) PE=1 SV=1	CG	Energy production and conversion;; Carbohydrate transport and metabolism	PREDICTED: scopoletin glucosyltransferase-like [Citrus sinensis]
gene12481	LOC107420290	5.88371	22.612	61.9142	4.42995	2.99472	6.80051	9.43048e-06	-2.67771300241699	down	--	--	Biological Process: sulfur amino acid metabolic process (GO:0000096);; Biological Process: MAPK cascade (GO:0000165);; Molecular Function: monooxygenase activity (GO:0004497);; Molecular Function: iron ion binding (GO:0005506);; Cellular Component: mitochondrion (GO:0005739);; Biological Process: glycine catabolic process (GO:0006546);; Biological Process: tryptophan catabolic process (GO:0006569…	K01723|0|pop:POPTR_0002s13220g|POPTRDRAFT_644172; allene oxide synthase family protein; K01723 hydroperoxide dehydratase [EC:4.2.1.92] (A)	alpha-Linolenic acid metabolism (ko00592)	Allene oxide synthase, chloroplastic (Precursor) GN=CYP74A OS=Linum usitatissimum (Flax) PE=1 SV=1	Q	Secondary metabolites biosynthesis, transport and catabolism	Allene oxide synthase [Morus notabilis]
gene163	LOC107425241	0.684337	2.17626	3.35892	0.348823	0.36007	0.277585	1.74495e-07	-2.68994508758388	down	--	--	Molecular Function: motor activity (GO:0003774);; Molecular Function: actin binding (GO:0003779);; Molecular Function: ATP binding (GO:0005524);; Cellular Component: myosin complex (GO:0016459);;	K10357|0|cmo:103499871|myosin-12; K10357 myosin V (A)	--	Myosin-12 GN=F20M17.6 OS=Arabidopsis thaliana (Mouse-ear cress) PE=2 SV=1	Z	Cytoskeleton	PREDICTED: myosin-12 [Populus euphratica]
gene25366	LOC107434310	2.97675	8.99711	11.1401	1.42431	0.553807	1.53375	1.61279e-07	-2.72303198566135	down	--	--	Molecular Function: transferase activity (GO:0016740);;	--	--	Probable long-chain-alcohol O-fatty-acyltransferase 1 GN=AT1 OS=Arabidopsis thaliana (Mouse-ear cress) PE=2 SV=1	S	Function unknown	PREDICTED: probable long-chain-alcohol O-fatty-acyltransferase 5 [Pyrus x bretschneideri]
gene20457	LOC107428961	1.31771	6.52743	15.8285	0.740039	1.96951	1.12171	2.1814e-05	-2.72478272888181	down	--	--	Cellular Component: integral component of membrane (GO:0016021);;	--	--	Phosphate transporter PHO1 homolog 3 OS=Arabidopsis thaliana (Mouse-ear cress) PE=2 SV=2	P	Inorganic ion transport and metabolism	Phosphate transporter PHO1-3-like protein [Morus notabilis]
gene659	LOC107413941	6.01197	11.4498	29.813	1.76059	2.60279	2.42924	9.771e-08	-2.75135068757838	down	--	--	--	--	--	--	S	Function unknown	hypothetical protein L484_011425 [Morus notabilis]
gene10928	LOC107418579	0.505171	3.69223	4.56633	0.380201	0.197878	0.789779	0.000119879	-2.75514211104779	down	--	--	--	--	--	--	R	General function prediction only	PREDICTED: O-glucosyltransferase rumi homolog [Pyrus x bretschneideri]
gene12917	LOC107420741	3.12788	15.6421	35.4658	2.57431	2.49006	3.11165	1.03153e-05	-2.7592454208555	down	--	--	--	--	--	--	S	Function unknown	hypothetical protein L484_012747 [Morus notabilis]
gene13816	LOC107421738	0.441826	5.41797	3.58465	0.403623	0.256139	0.759156	0.000153958	-2.76228876443529	down	[R]	General function prediction only	--	--	--	Ankyrin repeat-containing protein At2g01680 GN=At2g01680 OS=Arabidopsis thaliana (Mouse-ear cress) PE=2 SV=1	R	General function prediction only	Ankyrin repeat-containing protein [Morus notabilis]
gene2607	LOC107435541	8.40817	35.172	86.8529	4.71435	2.237	12.0249	5.70977e-05	-2.77125419979812	down	--	--	--	K13464|5.26902e-73|vvi:100260039|protein TIFY 10A; K13464 jasmonate ZIM domain-containing protein (A)	Plant hormone signal transduction (ko04075)	Protein TIFY 10A GN=T29M8.5 OS=Arabidopsis thaliana (Mouse-ear cress) PE=1 SV=1	S	Function unknown	hypothetical protein VITISV_015738 [Vitis vinifera]
gene2347	LOC107432640	0.366933	3.46658	8.61615	0.657681	0.506771	0.687936	0.000265516	-2.78522609953633	down	--	--	--	K18134|7.32407e-177|tcc:TCM_030824|Glycosyltransferase family 61 protein; K18134 protein O-GlcNAc transferase [EC:2.4.1.255] (A)	Other types of O-glycan biosynthesis (ko00514)	--	S	Function unknown	Glycosyltransferase family 61 protein [Theobroma cacao]
gene3673	LOC107410658	1.90402	9.29734	19.0975	1.23541	1.06728	2.11256	3.37588e-06	-2.78944853166529	down	--	--	Biological Process: carbohydrate metabolic process (GO:0005975);; Molecular Function: cellulase activity (GO:0008810);;	--	--	Endoglucanase 12 GN=OSJNBa0067K08.14 OS=Oryza sativa subsp. japonica (Rice) PE=2 SV=2	R	General function prediction only	PREDICTED: endoglucanase 12 [Eucalyptus grandis]
gene14569	LOC107422577	7.06056	15.2386	44.5649	3.41146	3.11025	3.06277	1.21496e-07	-2.796327242897	down	--	--	--	--	--	F-box protein At2g02240 GN=At2g02240 OS=Arabidopsis thaliana (Mouse-ear cress) PE=2 SV=1	R	General function prediction only	Putative F-box protein [Morus notabilis]
gene7349	LOC107414653	1.82712	25.257	37.5048	4.26671	1.82717	3.24446	0.00018382	-2.80050487642256	down	--	--	--	--	--	--	S	Function unknown	hypothetical protein L484_014209 [Morus notabilis]
gene13383	LOC107421268	24.5657	51.6961	203.345	17.7357	8.26337	14.4107	1.20942e-06	-2.80116666745609	down	--	--	--	--	--	Putative DNA-binding protein ESCAROLA GN=ESC OS=Arabidopsis thaliana (Mouse-ear cress) PE=2 SV=1	S	Function unknown	PREDICTED: putative DNA-binding protein ESCAROLA [Prunus mume]
gene23290	LOC107432065	1.89233	4.92383	10.0449	0.923664	0.548697	0.966174	2.13317e-07	-2.80725517648301	down	--	--	Molecular Function: aspartic-type endopeptidase activity (GO:0004190);; Biological Process: N-terminal protein myristoylation (GO:0006499);; Biological Process: proteolysis (GO:0006508);; Biological Process: fatty acid beta-oxidation (GO:0006635);; Biological Process: protein import into peroxisome matrix (GO:0016558);;	--	--	Aspartic proteinase-like protein 2 (Precursor) GN=At1g65240 OS=Arabidopsis thaliana (Mouse-ear cress) PE=1 SV=2	O	Posttranslational modification, protein turnover, chaperones	PREDICTED: aspartic proteinase-like protein 2 [Prunus mume]
gene7909	LOC107415307	4.1725	3.21066	6.65754	0	0.106956	1.82732	0.000433613	-2.81280969458901	down	[O]	Posttranslational modification, protein turnover, chaperones	Cellular Component: vacuole (GO:0005773);; Cellular Component: Golgi apparatus (GO:0005794);; Cellular Component: cytosol (GO:0005829);; Cellular Component: plasma membrane (GO:0005886);; Molecular Function: arsenate reductase (glutaredoxin) activity (GO:0008794);; Molecular Function: electron carrier activity (GO:0009055);; Molecular Function: protein disulfide oxidoreductase activity (GO:001503…	K03676|6.07912e-58|fve:101300837|glutaredoxin-C2-like; K03676 glutaredoxin 3 (A)	--	Glutaredoxin OS=Solanum lycopersicum (Tomato) PE=1 SV=1	O	Posttranslational modification, protein turnover, chaperones	PREDICTED: glutaredoxin [Nicotiana sylvestris]
gene8126	LOC107415521	12.8881	102.307	3.3572	2.71813	2.02914	11.9063	0.00192627	-2.82797347661748	down	--	--	--	--	--	Expansin-A16 (Precursor) GN=T22E16.160 OS=Arabidopsis thaliana (Mouse-ear cress) PE=2 SV=1	R	General function prediction only	expansin [Breonia chinensis]
gene23204	LOC107431889	2.39113	7.106	18.146	1.45696	0.856726	1.58875	6.98889e-07	-2.83022547143415	down	--	--	Biological Process: metabolic process (GO:0008152);; Molecular Function: transferase activity, transferring hexosyl groups (GO:0016758);;	K13496|0|vvi:100246560|scopoletin glucosyltransferase; K13496 UDP-glucosyl transferase 73C [EC:2.4.1.-] (A)	--	UDP-glycosyltransferase 73C3 GN=UGT73C3 OS=Arabidopsis thaliana (Mouse-ear cress) PE=2 SV=1	CG	Energy production and conversion;; Carbohydrate transport and metabolism	PREDICTED: scopoletin glucosyltransferase [Vitis vinifera]
gene455	LOC107411542	2.35427	8.25267	18.2442	1.51833	1.2145	1.31064	4.67486e-07	-2.83778730433915	down	--	--	Molecular Function: calmodulin binding (GO:0005516);; Biological Process: defense response (GO:0006952);; Biological Process: response to biotic stimulus (GO:0009607);; Cellular Component: integral component of membrane (GO:0016021);;	K08472|0|tcc:TCM_029793|Seven transmembrane MLO family protein; K08472 mlo protein (A)	--	MLO-like protein 6 GN=MLO6 OS=Arabidopsis thaliana (Mouse-ear cress) PE=2 SV=2	S	Function unknown	Seven transmembrane MLO family protein [Theobroma cacao]
gene7040	LOC107414286	0.908149	1.27288	2.31057	0.151801	0.226997	0.262406	4.44718e-08	-2.85128330078712	down	[G]	Carbohydrate transport and metabolism	Molecular Function: sucrose alpha-glucosidase activity (GO:0004575);; Biological Process: carbohydrate metabolic process (GO:0005975);;	K01193|0|pmum:103333352|beta-fructofuranosidase, soluble isoenzyme I-like; K01193 beta-fructofuranosidase [EC:3.2.1.26] (A)	Galactose metabolism (ko00052);; Starch and sucrose metabolism (ko00500)	Beta-fructofuranosidase, soluble isoenzyme I (Precursor) GN=INV*DC4 OS=Daucus carota (Wild carrot) PE=1 SV=2	G	Carbohydrate transport and metabolism	hypothetical protein L484_003380 [Morus notabilis]
gene13530	LOC107421441	3.58513	8.30951	24.5851	1.4775	1.48623	1.96299	6.06065e-08	-2.85184613525888	down	[G]	Carbohydrate transport and metabolism	Molecular Function: glucosylceramidase activity (GO:0004348);; Cellular Component: Golgi apparatus (GO:0005794);; Cellular Component: plasma membrane (GO:0005886);; Biological Process: glucosylceramide catabolic process (GO:0006680);; Cellular Component: integral component of membrane (GO:0016021);;	K17108|0|pop:POPTR_0019s10160g|POPTRDRAFT_1108286; hypothetical protein; K17108 non-lysosomal glucosylceramidase [EC:3.2.1.45] (A)	Other glycan degradation (ko00511);; Sphingolipid metabolism (ko00600)	--	G	Carbohydrate transport and metabolism	PREDICTED: non-lysosomal glucosylceramidase isoform X2 [Populus euphratica]
gene33003	LOC107409872	6.44824	23.3102	32.9157	3.69993	1.47168	3.54295	6.7858e-08	-2.87076044056086	down	[M]	Cell wall/membrane/envelope biogenesis	--	--	--	Acyl-CoA--sterol O-acyltransferase 1 GN=ASAT1 OS=Arabidopsis thaliana (Mouse-ear cress) PE=1 SV=1	S	Function unknown	hypothetical protein L484_013645 [Morus notabilis]
gene21563	LOC107430147	0.451529	1.09639	1.29345	0.115539	0.116294	0.177056	4.3166e-07	-2.87430959373941	down	--	--	Biological Process: carbohydrate metabolic process (GO:0005975);; Molecular Function: cellulase activity (GO:0008810);; Molecular Function: carbohydrate binding (GO:0030246);;	--	--	Endoglucanase 6 (Precursor) GN=At1g64390 OS=Arabidopsis thaliana (Mouse-ear cress) PE=2 SV=2	G	Carbohydrate transport and metabolism	PREDICTED: endoglucanase 6-like [Populus euphratica]
gene14291	LOC107422293	68.1757	355.454	332.057	40.3444	20.7749	42.3069	2.80724e-09	-2.88321810037688	down	--	--	Biological Process: defense response (GO:0006952);; Biological Process: response to biotic stimulus (GO:0009607);;	--	--	Major allergen Pru av 1 GN=PRUA1 OS=Prunus avium (Cherry) PE=1 SV=1	S	Function unknown	pollen allergen Ziz j 1 [Ziziphus jujuba]
gene21558	LOC107430138	4.87958	17.0075	42.2163	2.64046	1.46224	3.62263	9.02229e-07	-2.88837694749628	down	--	--	--	--	--	Putative RING-H2 finger protein ATL21A (Precursor) GN=ATL21A OS=Arabidopsis thaliana (Mouse-ear cress) PE=3 SV=1	O	Posttranslational modification, protein turnover, chaperones	PREDICTED: RING-H2 finger protein ATL20-like [Pyrus x bretschneideri]
gene8344	LOC107415749	1.00883	1.86283	3.49052	0.157758	0.162737	0.573688	3.25552e-06	-2.88840513574394	down	[Q]	Secondary metabolites biosynthesis, transport and catabolism	--	--	--	Cytochrome P450 87A3 GN=OSJNBa0088I22.16 OS=Oryza sativa subsp. japonica (Rice) PE=2 SV=3	Q	Secondary metabolites biosynthesis, transport and catabolism	PREDICTED: cytochrome P450 87A3-like [Prunus mume]
gene773	LOC107415416	1.31834	2.37482	5.40739	0.963721	0.0632099	0.614309	1.59328e-05	-2.88986543498246	down	[Q]	Secondary metabolites biosynthesis, transport and catabolism	Molecular Function: oxidoreductase activity, acting on paired donors, with incorporation or reduction of molecular oxygen, NAD(P)H as one donor, and incorporation of one atom of oxygen (GO:0016709);; Molecular Function: metal ion binding (GO:0046872);;	--	--	Cytochrome P450 71D8 GN=CYP71D8 OS=Glycine max (Soybean) PE=2 SV=1	Q	Secondary metabolites biosynthesis, transport and catabolism	Cytochrome P450 71D10, putative [Theobroma cacao]
gene17630	LOC107425878	6.01732	24.137	56.5879	3.40059	2.89909	5.09174	2.73252e-07	-2.93113252067556	down	[Q]	Secondary metabolites biosynthesis, transport and catabolism	Molecular Function: iron ion binding (GO:0005506);; Molecular Function: electron carrier activity (GO:0009055);; Molecular Function: heme binding (GO:0020037);; Biological Process: oxidation-reduction process (GO:0055114);; Molecular Function: aromatase activity (GO:0070330);;	K13407|0|vvi:100259592|cytochrome P450 94A1-like; K13407 fatty acid omega-hydroxylase [EC:1.14.-.-] (A)	Cutin, suberine and wax biosynthesis (ko00073)	Cytochrome P450 94A1 GN=CYP94A1 OS=Vicia sativa (Spring vetch) PE=2 SV=2	Q	Secondary metabolites biosynthesis, transport and catabolism	Cytochrome P450 94A1 [Morus notabilis]
gene1837	LOC107427075	7.82676	23.2452	123.298	10.3813	4.68996	5.14484	3.02267e-05	-2.93438090632853	down	[G]	Carbohydrate transport and metabolism	Molecular Function: chitinase activity (GO:0004568);; Biological Process: carbohydrate metabolic process (GO:0005975);; Biological Process: chitin catabolic process (GO:0006032);;	K01183|1.36163e-160|pper:PRUPE_ppa007396mg|hypothetical protein; K01183 chitinase [EC:3.2.1.14] (A)	Amino sugar and nucleotide sugar metabolism (ko00520)	--	G	Carbohydrate transport and metabolism	hypothetical protein PRUPE_ppa007396mg [Prunus persica]
gene15774	LOC107423888	178.305	461.212	1349.64	125.563	60.0281	75.1067	4.23776e-08	-2.94819808309428	down	--	--	Cellular Component: extracellular region (GO:0005576);; Molecular Function: manganese ion binding (GO:0030145);; Molecular Function: nutrient reservoir activity (GO:0045735);; Biological Process: defense response to Gram-negative bacterium (GO:0050829);; Biological Process: defense response to Gram-positive bacterium (GO:0050830);; Biological Process: defense response to fungus (GO:0050832);; Bio…	--	--	Auxin-binding protein ABP19a (Precursor) GN=ABP19A OS=Prunus persica (Peach) PE=3 SV=1	R	General function prediction only	PREDICTED: auxin-binding protein ABP19a-like [Fragaria vesca subsp. vesca]
gene25981	LOC107434995	0.70477	6.3818	11.4305	1.18706	0.294805	0.973746	7.54466e-05	-2.95011913612526	down	[I]	Lipid transport and metabolism	Molecular Function: triglyceride lipase activity (GO:0004806);; Biological Process: lipid metabolic process (GO:0006629);; Molecular Function: phosphatidylcholine 1-acylhydrolase activity (GO:0008970);; Biological Process: ethylene biosynthetic process (GO:0009693);; Molecular Function: galactolipase activity (GO:0047714);;	--	--	Phospholipase A1-Ibeta2, chloroplastic (Precursor) GN=At4g16820 OS=Arabidopsis thaliana (Mouse-ear cress) PE=1 SV=2	I	Lipid transport and metabolism	Phospholipase A1-Ibeta2 [Morus notabilis]
gene33132	LOC107410015	66.9864	136.695	319.685	20.9009	19.9955	25.8808	1.34585e-11	-2.95438644457247	down	[I]	Lipid transport and metabolism	Molecular Function: hydroxymethylglutaryl-CoA synthase activity (GO:0004421);; Biological Process: isoprenoid biosynthetic process (GO:0008299);;	K01641|5.45876e-102|cmo:103490966|hydroxymethylglutaryl-CoA synthase; K01641 hydroxymethylglutaryl-CoA synthase [EC:2.3.3.10] (A)	Synthesis and degradation of ketone bodies (ko00072);; Valine, leucine and isoleucine degradation (ko00280);; Butanoate metabolism (ko00650);; Terpenoid backbone biosynthesis (ko00900)	Hydroxymethylglutaryl-CoA synthase GN=T26M18.30 OS=Arabidopsis thaliana (Mouse-ear cress) PE=1 SV=2	I	Lipid transport and metabolism	Hydroxymethylglutaryl-CoA synthase [Morus notabilis]
gene25311	LOC107434245	4.74459	8.27026	24.6687	1.91636	1.41601	2.04754	1.09425e-09	-2.9722885330385	down	[V]	Defense mechanisms	Molecular Function: ATP binding (GO:0005524);; Biological Process: ATP catabolic process (GO:0006200);; Molecular Function: organic phosphonate transmembrane-transporting ATPase activity (GO:0015416);; Cellular Component: membrane (GO:0016020);;	--	--	Pleiotropic drug resistance protein 1 GN=PDR1 OS=Nicotiana tabacum (Common tobacco) PE=2 SV=1	Q	Secondary metabolites biosynthesis, transport and catabolism	hypothetical protein PRUPE_ppa000227mg [Prunus persica]
gene28729	LOC107405248	93.1303	221.671	470.573	28.6919	32.1721	38.8833	7.05115e-12	-2.98465539928869	down	[I]	Lipid transport and metabolism	Molecular Function: hydroxymethylglutaryl-CoA synthase activity (GO:0004421);; Biological Process: isoprenoid biosynthetic process (GO:0008299);;	K01641|5.7229e-111|rcu:RCOM_1683050|hydroxymethylglutaryl-CoA synthase, putative (EC:2.3.3.10); K01641 hydroxymethylglutaryl-CoA synthase [EC:2.3.3.10] (A)	Synthesis and degradation of ketone bodies (ko00072);; Valine, leucine and isoleucine degradation (ko00280);; Butanoate metabolism (ko00650);; Terpenoid backbone biosynthesis (ko00900)	Hydroxymethylglutaryl-CoA synthase GN=T26M18.30 OS=Arabidopsis thaliana (Mouse-ear cress) PE=1 SV=2	I	Lipid transport and metabolism	hydroxymethylglutaryl-CoA synthase, putative [Ricinus communis]
gene3528	LOC107410505	0.520578	2.4798	4.59965	0.218115	0.153633	0.608638	4.27096e-05	-2.98877287057737	down	[Q]	Secondary metabolites biosynthesis, transport and catabolism	Molecular Function: iron ion binding (GO:0005506);; Molecular Function: electron carrier activity (GO:0009055);; Molecular Function: alkane 1-monooxygenase activity (GO:0018685);; Molecular Function: heme binding (GO:0020037);; Biological Process: oxidation-reduction process (GO:0055114);; Molecular Function: aromatase activity (GO:0070330);;	--	--	Cytochrome P450 94C1 GN=CYP94C1 OS=Arabidopsis thaliana (Mouse-ear cress) PE=2 SV=1	Q	Secondary metabolites biosynthesis, transport and catabolism	PREDICTED: cytochrome P450 94C1 [Prunus mume]
gene2138	LOC107430433	0.812214	1.75226	4.88145	0.284721	0.174097	0.525358	6.87803e-06	-3.00042824155971	down	--	--	--	--	--	--	S	Function unknown	hypothetical protein L484_018748 [Morus notabilis]
gene3125	LOC107408760	0.458184	5.36814	7.83733	0.409066	0.543633	0.775294	2.88848e-05	-3.00895671746575	down	[MG]	Cell wall/membrane/envelope biogenesis;; Carbohydrate transport and metabolism	Biological Process: response to cold (GO:0009409);; Biological Process: lignin biosynthetic process (GO:0009809);; Molecular Function: cinnamoyl-CoA reductase activity (GO:0016621);; Molecular Function: dihydrokaempferol 4-reductase activity (GO:0045552);; Molecular Function: coenzyme binding (GO:0050662);; Biological Process: oxidation-reduction process (GO:0055114);;	K09753|0|tcc:TCM_027422|Cinnamoyl coa reductase 1 isoform 1; K09753 cinnamoyl-CoA reductase [EC:1.2.1.44] (A)	Phenylpropanoid biosynthesis (ko00940)	Cinnamoyl-CoA reductase 1 GN=T24D18.5 OS=Arabidopsis thaliana (Mouse-ear cress) PE=1 SV=1	Q	Secondary metabolites biosynthesis, transport and catabolism	cinnamoyl-CoA reductase [Hevea brasiliensis]
gene21650	LOC107430239	16.9541	21.2557	109.338	8.19815	3.41628	6.37507	1.47946e-07	-3.02952072499425	down	[P]	Inorganic ion transport and metabolism	Biological Process: cation transport (GO:0006812);; Molecular Function: solute:proton antiporter activity (GO:0015299);; Cellular Component: integral component of membrane (GO:0016021);; Biological Process: transmembrane transport (GO:0055085);;	--	--	Cation/H(+) antiporter 18 GN=CHX18 OS=Arabidopsis thaliana (Mouse-ear cress) PE=2 SV=1	P	Inorganic ion transport and metabolism	PREDICTED: cation/H(+) antiporter 18 [Pyrus x bretschneideri]
gene16589	LOC107424763	4.81508	50.5439	80.7155	7.08688	4.66794	3.53773	2.86332e-06	-3.03891410061601	down	[R]	General function prediction only	Biological Process: lipid metabolic process (GO:0006629);; Molecular Function: hydrolase activity (GO:0016787);;	--	--	Patatin-like protein 2 GN=PLP2 OS=Arabidopsis thaliana (Mouse-ear cress) PE=1 SV=1	I	Lipid transport and metabolism	PREDICTED: patatin-like protein 2 [Nicotiana sylvestris]
gene24937	LOC107433852	16.2205	54.6963	69.2962	5.67254	3.12082	8.5611	2.17013e-10	-3.04084887060247	down	[Q]	Secondary metabolites biosynthesis, transport and catabolism	Molecular Function: monooxygenase activity (GO:0004497);; Molecular Function: iron ion binding (GO:0005506);; Molecular Function: electron carrier activity (GO:0009055);; Molecular Function: oxidoreductase activity, acting on paired donors, with incorporation or reduction of molecular oxygen (GO:0016705);; Molecular Function: heme binding (GO:0020037);; Biological Process: oxidation-reduction pro…	--	--	Beta-amyrin 28-oxidase OS=Panax ginseng (Korean ginseng) PE=2 SV=1	Q	Secondary metabolites biosynthesis, transport and catabolism	PREDICTED: beta-amyrin 28-oxidase-like isoform X1 [Malus domestica]
gene19956	LOC107428394	11.8595	13.5004	62.7682	3.27757	2.95609	4.20815	2.13344e-08	-3.08066015474565	down	--	--	Molecular Function: transferase activity, transferring acyl groups (GO:0016746);;	--	--	Vinorine synthase GN=ACT OS=Rauvolfia serpentina (Serpentine wood) PE=1 SV=2	S	Function unknown	PREDICTED: BAHD acyltransferase At5g47980-like [Prunus mume]
gene1414	LOC107422203	0.195134	3.14369	1.37926	8.98038e-06	9.18795e-06	0.552783	0.00775263	-3.08812744007229	down	--	--	--	--	--	--	S	Function unknown	PREDICTED: uncharacterized protein LOC103324630 [Prunus mume]
gene12559	LOC107420388	26.8526	148.396	215.57	16.613	11.1285	18.0898	3.47562e-09	-3.09097756398528	down	[C]	Energy production and conversion	Molecular Function: malate dehydrogenase (decarboxylating) (NADP+) activity (GO:0004473);; Biological Process: gluconeogenesis (GO:0006094);; Biological Process: malate metabolic process (GO:0006108);; Biological Process: fatty acid biosynthetic process (GO:0006633);; Biological Process: cytoskeleton organization (GO:0007010);; Molecular Function: zinc ion binding (GO:0008270);; Biological Proces…	K00029|0|cit:102622357|NADP-dependent malic enzyme-like; K00029 malate dehydrogenase (oxaloacetate-decarboxylating)(NADP+) [EC:1.1.1.40] (A)	Pyruvate metabolism (ko00620);; Carbon fixation in photosynthetic organisms (ko00710);; Carbon metabolism (ko01200)	NADP-dependent malic enzyme OS=Vitis vinifera (Grape) PE=2 SV=1	C	Energy production and conversion	NADP-dependent malic enzyme [Morus notabilis]
gene20038	LOC107428459	8.28812	25.5106	63.3156	3.24768	3.24466	4.90241	1.10421e-08	-3.09574163667469	down	[Q]	Secondary metabolites biosynthesis, transport and catabolism	--	--	--	Cytochrome P450 71B37 GN=CYP71B37 OS=Arabidopsis thaliana (Mouse-ear cress) PE=3 SV=2	Q	Secondary metabolites biosynthesis, transport and catabolism	Cytochrome P450 [Morus notabilis]
gene14981	LOC107423035	2.69307	10.9171	32.5022	1.41267	0.80644	1.72243	1.15342e-06	-3.10123697175976	down	[I]	Lipid transport and metabolism	--	--	--	2-hydroxyisoflavanone dehydratase GN=HIDM OS=Glycyrrhiza echinata (Licorice) PE=1 SV=1	V	Defense mechanisms	PREDICTED: 2-hydroxyisoflavanone dehydratase-like [Malus domestica]
gene25889	LOC107434877	39.6375	98.3402	207.21	11.7058	14.9529	12.2355	1.45579e-11	-3.1030309384197	down	[I]	Lipid transport and metabolism	--	K01641|5.7462e-73|gmx:100788028|hydroxymethylglutaryl-CoA synthase-like; K01641 hydroxymethylglutaryl-CoA synthase [EC:2.3.3.10] (A)	Synthesis and degradation of ketone bodies (ko00072);; Valine, leucine and isoleucine degradation (ko00280);; Butanoate metabolism (ko00650);; Terpenoid backbone biosynthesis (ko00900)	Hydroxymethylglutaryl-CoA synthase GN=T26M18.30 OS=Arabidopsis thaliana (Mouse-ear cress) PE=1 SV=2	I	Lipid transport and metabolism	unknown [Glycine max]
gene6363	LOC107413577	5.61169	7.97593	22.8529	1.81569	1.26885	1.18677	3.38123e-09	-3.11179069524032	down	--	--	Cellular Component: nucleus (GO:0005634);; Cellular Component: plant-type vacuole membrane (GO:0009705);; Biological Process: flavonoid biosynthetic process (GO:0009813);; Biological Process: response to UV-B (GO:0010224);; Cellular Component: extrinsic component of endoplasmic reticulum membrane (GO:0042406);; Molecular Function: chalcone isomerase activity (GO:0045430);; Biological Process: res…	K01859|1.81267e-113|fve:101292744|chalcone--flavonone isomerase 1-like; K01859 chalcone isomerase [EC:5.5.1.6] (A)	Flavonoid biosynthesis (ko00941)	Chalcone--flavonone isomerase 1 GN=CHI1 OS=Fragaria ananassa (Strawberry) PE=2 SV=1	G	Carbohydrate transport and metabolism	PREDICTED: chalcone--flavonone isomerase 1-like [Fragaria vesca subsp. vesca]
gene25711	LOC107434708	3.42017	10.3846	17.8813	1.3772	0.995614	1.28546	6.01801e-10	-3.11443406255785	down	[R]	General function prediction only	Biological Process: proteolysis (GO:0006508);; Molecular Function: peptidase activity (GO:0008233);; Molecular Function: hydrolase activity, acting on glycosyl bonds (GO:0016798);;	K18881|0|rcu:RCOM_0763700|protease C56, putative; K18881 D-lactate dehydratase [EC:4.2.1.130] (A)	Pyruvate metabolism (ko00620)	Protein DJ-1 homolog D GN=DJ1D OS=Arabidopsis thaliana (Mouse-ear cress) PE=1 SV=1	V	Defense mechanisms	hypothetical protein JCGZ_10472 [Jatropha curcas]
gene8469	LOC107415924	0.972994	3.67434	5.13132	0.118336	0.203671	0.834734	1.77121e-05	-3.11765478977694	down	[GC]	Carbohydrate transport and metabolism;; Energy production and conversion	Biological Process: metabolic process (GO:0008152);; Molecular Function: hydroquinone glucosyltransferase activity (GO:0050505);;	--	--	UDP-glycosyltransferase 88A1 GN=UGT88A1 OS=Arabidopsis thaliana (Mouse-ear cress) PE=2 SV=1	CG	Energy production and conversion;; Carbohydrate transport and metabolism	Anthocyanidin 5,3-O-glucosyltransferase [Morus notabilis]
gene14310	LOC107422286	52.0468	274.207	270.485	32.5636	21.732	14.6605	6.86975e-10	-3.1237438661247	down	--	--	Biological Process: defense response (GO:0006952);; Biological Process: response to biotic stimulus (GO:0009607);;	--	--	Major allergen Pru av 1 GN=PRUA1 OS=Prunus avium (Cherry) PE=1 SV=1	S	Function unknown	pollen allergen Ziz j 1 [Ziziphus jujuba]
gene11068	LOC107418742	34.943	66.3574	145.358	10.7824	6.14688	11.0091	2.18274e-12	-3.1306104487343	down	[O]	Posttranslational modification, protein turnover, chaperones	Molecular Function: lactoylglutathione lyase activity (GO:0004462);; Molecular Function: transferase activity (GO:0016740);;	K00799|2.09808e-88|rcu:RCOM_0243930|glutathione s-transferase, putative (EC:4.4.1.5); K00799 glutathione S-transferase [EC:2.5.1.18] (A)	Glutathione metabolism (ko00480)	Probable glutathione S-transferase GN=HSP26-A OS=Glycine max (Soybean) PE=2 SV=1	O	Posttranslational modification, protein turnover, chaperones	glutathione s-transferase, putative [Ricinus communis]
gene11700	LOC107419438	1.46573	4.17954	9.22394	0.457848	0.226717	0.943249	1.48449e-06	-3.18043226334105	down	[R]	General function prediction only	Molecular Function: acid phosphatase activity (GO:0003993);;	K14379|0|pper:PRUPE_ppa008418mg|hypothetical protein; K14379 tartrate-resistant acid phosphatase type 5 [EC:3.1.3.2] (A)	Riboflavin metabolism (ko00740)	Purple acid phosphatase 17 (Precursor) GN=MEB5.10 OS=Arabidopsis thaliana (Mouse-ear cress) PE=2 SV=1	O	Posttranslational modification, protein turnover, chaperones	hypothetical protein PRUPE_ppa008418mg [Prunus persica]
gene6135	LOC107413320	3.95238	49.7698	77.595	2.6535	2.55242	8.86676	6.14037e-05	-3.19891993891244	down	--	--	--	--	--	--	S	Function unknown	PREDICTED: uncharacterized protein LOC103403228 [Malus domestica]
gene14850	LOC107422855	0.580994	34.769	4.19019	3.84218	0	0.581985	0.0104288	-3.20473740549986	down	--	--	--	--	--	--	R	General function prediction only	PREDICTED: mucin-3B-like [Camelina sativa]
gene16458	LOC107424624	1.54456	6.04026	15.8535	1.16186	0.626926	0.737187	1.55876e-07	-3.21289933414486	down	[RTKL]	General function prediction only;; Signal transduction mechanisms;; Transcription;; Replication, recombination and repair	Molecular Function: nucleotide binding (GO:0000166);; Molecular Function: protein kinase activity (GO:0004672);; Biological Process: phosphorylation (GO:0016310);;	--	--	Putative leucine-rich repeat receptor-like protein kinase At2g19210 (Precursor) GN=At2g19210 OS=Arabidopsis thaliana (Mouse-ear cress) PE=3 SV=1	T	Signal transduction mechanisms	PREDICTED: putative leucine-rich repeat receptor-like protein kinase At2g19210-like isoform X1 [Citrus sinensis]
gene7003	LOC107414326	5.74313	8.55615	53.4843	5.66617	1.30884	0.250303	0.000410604	-3.21565088416429	down	--	--	--	--	--	Alpha-amylase/subtilisin inhibitor (Precursor) GN=OSJNBa0038O10.14 OS=Oryza sativa subsp. japonica (Rice) PE=1 SV=2	R	General function prediction only	PREDICTED: alpha-amylase/subtilisin inhibitor-like [Prunus mume]
gene20131	LOC107428587	0.792871	4.47894	9.23395	0.255876	0.265628	1.19377	3.03719e-05	-3.21970795409909	down	[V]	Defense mechanisms	--	K03327|0|mdm:103452037|protein TRANSPARENT TESTA 12-like; K03327 multidrug resistance protein, MATE family (A)	--	Protein TRANSPARENT TESTA 12 GN=F17J16_80 OS=Arabidopsis thaliana (Mouse-ear cress) PE=2 SV=1	S	Function unknown	PREDICTED: protein TRANSPARENT TESTA 12-like [Malus domestica]
gene27579	LOC107403986	5.73221	5.324	56.3225	2.59925	1.5901	2.96223	3.74014e-05	-3.22635244423178	down	[E]	Amino acid transport and metabolism	Molecular Function: lyase activity (GO:0016829);;	--	--	--	R	General function prediction only	PREDICTED: uncharacterized protein LOC104099009 [Nicotiana tomentosiformis]
gene26196	LOC107435237	1.56411	6.03796	42.2768	2.95501	1.2595	1.22386	0.000195613	-3.23196040487514	down	--	--	Molecular Function: catalytic activity (GO:0003824);; Cellular Component: cytoplasmic membrane-bounded vesicle (GO:0016023);;	--	--	Somatic embryogenesis receptor kinase 2 (Precursor) GN=SERK2 OS=Arabidopsis thaliana (Mouse-ear cress) PE=1 SV=1	R	General function prediction only	PREDICTED: somatic embryogenesis receptor kinase 1-like [Fragaria vesca subsp. vesca]
gene10189	LOC107417794	1.48467	1.40887	11.0417	0.394125	0.65663	0.468635	1.42375e-05	-3.24083858937144	down	--	--	--	--	--	Protein trichome birefringence-like 38 GN=TBL38 OS=Arabidopsis thaliana (Mouse-ear cress) PE=2 SV=1	R	General function prediction only	hypothetical protein L484_008607 [Morus notabilis]
gene12453	LOC107420196	18.1069	7.03656	63.7156	3.78277	2.06138	3.36818	7.10981e-08	-3.27127027224153	down	--	--	Molecular Function: transferase activity, transferring glycosyl groups (GO:0016757);;	K08237|7.13406e-106|pop:POPTR_0014s04140g|hypothetical protein; K08237 hydroquinone glucosyltransferase [EC:2.4.1.218] (A)	--	UDP-glycosyltransferase 72B1 GN=UGT72B1 OS=Arabidopsis thaliana (Mouse-ear cress) PE=1 SV=1	CG	Energy production and conversion;; Carbohydrate transport and metabolism	hypothetical protein POPTR_0014s04140g [Populus trichocarpa]
gene22606	LOC107431270	1.13732	18.2588	56.4399	3.41125	2.43073	2.49377	5.15878e-05	-3.28105331549297	down	--	--	--	--	--	Protein LURP-one-related 15 GN=At5g01750 OS=Arabidopsis thaliana (Mouse-ear cress) PE=1 SV=1	S	Function unknown	unknown [Lotus japonicus]
gene9907	LOC107417470	0.951744	3.04835	5.19993	0.277052	0.283141	0.393344	1.0959e-07	-3.35566936698346	down	[M]	Cell wall/membrane/envelope biogenesis	--	--	--	Acyl-CoA--sterol O-acyltransferase 1 GN=ASAT1 OS=Arabidopsis thaliana (Mouse-ear cress) PE=1 SV=1	S	Function unknown	PREDICTED: acyl-CoA--sterol O-acyltransferase 1-like [Malus domestica]
gene6999	LOC107414276	0.483018	2.29394	7.41005	0.32622	0.390928	0.281253	2.78537e-06	-3.36766401513827	down	[RTKL]	General function prediction only;; Signal transduction mechanisms;; Transcription;; Replication, recombination and repair	Molecular Function: protein kinase activity (GO:0004672);;	--	--	Probable LRR receptor-like serine/threonine-protein kinase At1g53430 (Precursor) GN=At1g53430 OS=Arabidopsis thaliana (Mouse-ear cress) PE=1 SV=1	T	Signal transduction mechanisms	PREDICTED: probable LRR receptor-like serine/threonine-protein kinase At1g53430-like [Fragaria vesca subsp. vesca]
gene2488	LOC107433734	6.8074	41.9506	5.49791	0.557367	1.11086	3.50796	1.33202e-05	-3.40944857488941	down	--	--	--	--	--	Fasciclin-like arabinogalactan protein 1 (Precursor) GN=FLA1 OS=Arabidopsis thaliana (Mouse-ear cress) PE=1 SV=1	R	General function prediction only	PREDICTED: fasciclin-like arabinogalactan protein 1-like [Fragaria vesca subsp. vesca]
gene26928	LOC107403276	11.0593	35.3935	81.7383	6.12566	2.91713	5.13535	9.4433e-10	-3.43386273424763	down	[Q]	Secondary metabolites biosynthesis, transport and catabolism	Molecular Function: binding (GO:0005488);; Molecular Function: oxidoreductase activity (GO:0016491);;	--	--	Beta-amyrin 28-oxidase OS=Panax ginseng (Korean ginseng) PE=2 SV=1	Q	Secondary metabolites biosynthesis, transport and catabolism	PREDICTED: cytochrome P450 716B2-like [Fragaria vesca subsp. vesca]
gene9219	LOC107416707	1.23252	1.56029	7.97035	0.236851	0.427023	0.355954	1.75271e-06	-3.44266940854549	down	--	--	--	--	--	7-deoxyloganetin glucosyltransferase GN=UGT85A24 OS=Gardenia jasminoides (Cape jasmine) PE=1 SV=1	G	Carbohydrate transport and metabolism	PREDICTED: 7-deoxyloganetin glucosyltransferase-like [Pyrus x bretschneideri]
gene9219	LOC107416707	1.23252	1.56029	7.97035	0.236851	0.427023	0.355954	1.75e-06	-3.442669409	down	--	--	--	--	--	--	--	--	--
gene23257	LOC107431984	281.785	563.685	1906.22	150.374	73.3981	32.8349	1.44983e-08	-3.46544836618991	down	--	--	Cellular Component: extracellular region (GO:0005576);; Biological Process: defense response (GO:0006952);;	--	--	Thaumatin-like protein 1 (Precursor) OS=Prunus persica (Peach) PE=2 SV=1	R	General function prediction only	PREDICTED: thaumatin-like protein 1 [Prunus mume]
gene9654	LOC107417188	2.51224	58.4254	62.6775	2.98639	3.5332	4.67432	6.91224e-06	-3.47387240473834	down	--	--	--	--	--	--	S	Function unknown	PREDICTED: uncharacterized protein LOC101207576 [Cucumis sativus]
gene6845	LOC107414104	4.08569	7.58386	11.9603	0.909866	0.658225	0.622964	2.68869e-11	-3.47983163684353	down	--	--	Biological Process: cellular process (GO:0009987);;	K09286|1.17284e-76|tcc:TCM_014845|AP2/ERF domain-containing transcription factor, putative; K09286 EREBP-like factor (A)	--	Ethylene-responsive transcription factor 2 GN=ERF2 OS=Nicotiana tabacum (Common tobacco) PE=2 SV=1	K	Transcription	AP2/ERF domain-containing transcription factor, putative [Theobroma cacao]
gene7350	LOC107414654	1.14054	26.1128	36.454	4.02988	0.48207	1.19728	0.000157827	-3.51658427893409	down	--	--	--	--	--	--	S	Function unknown	hypothetical protein L484_014210 [Morus notabilis]
gene4193	LOC107411268	31.0873	56.4329	152.757	9.76197	6.30142	4.5896	7.0042e-13	-3.54561139870687	down	[R]	General function prediction only	--	--	--	Flavonol synthase/flavanone 3-hydroxylase GN=FLS OS=Citrus unshiu (Satsuma mandarin) PE=1 SV=1	Q	Secondary metabolites biosynthesis, transport and catabolism	hypothetical protein PRUPE_ppa007865mg [Prunus persica]
gene16124	LOC107424258	0.878922	5.8576	12.5402	0.755916	0.469659	0.449543	8.9432e-07	-3.54682942329308	down	[RTKL]	General function prediction only;; Signal transduction mechanisms;; Transcription;; Replication, recombination and repair	Molecular Function: protein serine/threonine kinase activity (GO:0004674);; Molecular Function: non-membrane spanning protein tyrosine kinase activity (GO:0004715);; Molecular Function: ATP binding (GO:0005524);; Biological Process: protein phosphorylation (GO:0006468);; Molecular Function: carbohydrate binding (GO:0030246);;	--	--	Probable L-type lectin-domain containing receptor kinase S.5 (Precursor) GN=LECRKS5 OS=Arabidopsis thaliana (Mouse-ear cress) PE=2 SV=1	T	Signal transduction mechanisms	putative L-type lectin-domain containing receptor kinase S.5 -like protein [Gossypium arboreum]
jujube_newGene_1533	--	0.763343	2.36059	7.00025	0.345489	0.159892	0.368422	9.87229e-07	-3.55630171009782	down	--	--	--	--	--	--	S	Function unknown	hypothetical protein L484_022450 [Morus notabilis]
gene19291	LOC107427689	12.9809	50.6517	100.794	4.10968	2.85447	6.66638	7.20489e-11	-3.59849638081571	down	[V]	Defense mechanisms	Molecular Function: ATP binding (GO:0005524);; Biological Process: ATP catabolic process (GO:0006200);; Molecular Function: organic phosphonate transmembrane-transporting ATPase activity (GO:0015416);; Cellular Component: membrane (GO:0016020);;	--	--	Pleiotropic drug resistance protein 1 GN=PDR1 OS=Nicotiana tabacum (Common tobacco) PE=2 SV=1	Q	Secondary metabolites biosynthesis, transport and catabolism	hypothetical protein PRUPE_ppa000227mg [Prunus persica]
gene24388	LOC107433225	5.51875	42.1816	78.6543	6.33451	1.8351	2.05321	1.21715e-06	-3.60688001523273	down	--	--	Biological Process: defense response (GO:0006952);; Biological Process: response to biotic stimulus (GO:0009607);;	--	--	Major allergen Pru ar 1 OS=Prunus armeniaca (Apricot) PE=1 SV=1	S	Function unknown	Bet v 1 allergen [Quercus suber]
gene22323	LOC107430990	3.56386	19.3299	50.4263	1.22373	1.85112	3.00523	1.06954e-07	-3.61744449780103	down	--	--	--	K17893|0|eus:EUTSA_v10021013mg|hypothetical protein; K17893 ubiquinol oxidase [EC:1.10.3.11] (A)	--	Ubiquinol oxidase 1a, mitochondrial (Precursor) GN=MCB17.11 OS=Arabidopsis thaliana (Mouse-ear cress) PE=1 SV=2	C	Energy production and conversion	hypothetical protein EUTSA_v10021013mg [Eutrema salsugineum]
gene32981	LOC107409847	4.22199	8.69373	33.808	1.52068	0.928103	1.38655	1.68659e-08	-3.62907497519262	down	--	--	--	--	--	Ethylene-responsive transcription factor ABR1 GN=MVP7.8 OS=Arabidopsis thaliana (Mouse-ear cress) PE=2 SV=1	K	Transcription	unnamed protein product [Vitis vinifera]
gene27618	LOC107404027	1.25724	7.81346	15.7377	0.550824	0.317955	1.13498	2.97112e-07	-3.64630341654747	down	--	--	--	--	--	Ankyrin repeat-containing protein At3g12360 GN=At3g12360 OS=Arabidopsis thaliana (Mouse-ear cress) PE=2 SV=1	R	General function prediction only	Ankyrin repeat-containing protein [Morus notabilis]
gene12965	LOC107420792	5.50611	11.1019	9.43989	0.455343	0.256369	1.36724	7.99666e-12	-3.67650342960095	down	--	--	Molecular Function: peroxidase activity (GO:0004601);; Biological Process: response to oxidative stress (GO:0006979);; Molecular Function: heme binding (GO:0020037);; Molecular Function: metal ion binding (GO:0046872);; Biological Process: oxidation-reduction process (GO:0055114);;	K00430|2.1818e-180|tcc:TCM_036816|Peroxidase superfamily protein; K00430 peroxidase [EC:1.11.1.7] (A)	Phenylalanine metabolism (ko00360);; Phenylpropanoid biosynthesis (ko00940)	Peroxidase 45 (Precursor) GN=F9N11.20 OS=Arabidopsis thaliana (Mouse-ear cress) PE=1 SV=1	S	Function unknown	Peroxidase superfamily protein [Theobroma cacao]
gene18093	LOC107426278	7.24616	20.4746	59.0575	2.82444	1.91003	1.95974	4.1915e-11	-3.6980740187375	down	[P]	Inorganic ion transport and metabolism	Molecular Function: potassium ion transmembrane transporter activity (GO:0015079);; Cellular Component: membrane (GO:0016020);; Biological Process: potassium ion transmembrane transport (GO:0071805);;	K03549|0|pmum:103333887|potassium transporter 5-like; K03549 KUP system potassium uptake protein (A)	--	Potassium transporter 5 GN=T9E8.160 OS=Arabidopsis thaliana (Mouse-ear cress) PE=1 SV=1	P	Inorganic ion transport and metabolism	PREDICTED: potassium transporter 5-like [Prunus mume]
gene14971	LOC107423040	46.0306	96.6771	301.435	14.3239	7.95892	11.5555	1.81855e-12	-3.70269307694056	down	[GEPR]	Carbohydrate transport and metabolism;; Amino acid transport and metabolism;; Inorganic ion transport and metabolism;; General function prediction only	Molecular Function: high-affinity hydrogen:glucose symporter activity (GO:0005358);; Cellular Component: cytoplasm (GO:0005737);; Cellular Component: plasma membrane (GO:0005886);; Biological Process: response to water deprivation (GO:0009414);; Cellular Component: plasmodesma (GO:0009506);; Biological Process: response to salt stress (GO:0009651);; Biological Process: response to abscisic acid (…	--	--	Sugar transport protein 13 GN=F9D12.17 OS=Arabidopsis thaliana (Mouse-ear cress) PE=1 SV=2	R	General function prediction only	hypothetical protein PRUPE_ppa004132mg [Prunus persica]
gene3028	LOC107406958	1.77808	2.15236	10.5856	0.279005	0.340381	0.540762	1.83611e-07	-3.71041621442536	down	[GC]	Carbohydrate transport and metabolism;; Energy production and conversion	Molecular Function: transferase activity, transferring glycosyl groups (GO:0016757);;	K13691|8.88251e-101|vvi:100242294|	--	UDP-glycosyltransferase 74F1 GN=UGT74F1 OS=Arabidopsis thaliana (Mouse-ear cress) PE=1 SV=1	CG	Energy production and conversion;; Carbohydrate transport and metabolism	UDP-glycosyltransferase 74F2 [Morus notabilis]
gene21109	LOC107429661	1.96446	2.605	1.94919	0.0976278	0	0.378977	3.88186e-08	-3.71355830647211	down	--	--	Biological Process: metal ion transport (GO:0030001);; Molecular Function: metal ion binding (GO:0046872);;	--	--	Heavy metal-associated isoprenylated plant protein 26 (Precursor) GN=F20M13.140 OS=Arabidopsis thaliana (Mouse-ear cress) PE=1 SV=1	P	Inorganic ion transport and metabolism	Heavy metal transport/detoxification superfamily protein [Theobroma cacao]
gene969	LOC107417280	5.00685	8.85313	22.6252	1.12459	0.537851	1.06706	1.30019e-10	-3.72133354473712	down	--	--	Cellular Component: integral component of membrane (GO:0016021);;	--	--	Probable amino acid permease 7 GN=AAP7 OS=Arabidopsis thaliana (Mouse-ear cress) PE=1 SV=1	E	Amino acid transport and metabolism	PREDICTED: probable amino acid permease 7-like isoform X2 [Glycine max]
gene32846	LOC107409699	2.04691	6.31543	3.42992	0.1986	0.387948	0.367191	2.7638e-10	-3.7255313517353	down	--	--	Molecular Function: enzyme inhibitor activity (GO:0004857);; Cellular Component: extracellular region (GO:0005576);; Cellular Component: cell wall (GO:0005618);; Molecular Function: pectinesterase activity (GO:0030599);; Biological Process: cell wall modification (GO:0042545);; Biological Process: negative regulation of catalytic activity (GO:0043086);; Molecular Function: aspartyl esterase activ…	K01051|1.89727e-148|mdm:103431870|pectinesterase 3-like; K01051 pectinesterase [EC:3.1.1.11] (A)	Pentose and glucuronate interconversions (ko00040);; Starch and sucrose metabolism (ko00500)	Pectinesterase 3 (Precursor) OS=Citrus sinensis (Sweet orange) PE=1 SV=1	G	Carbohydrate transport and metabolism	PREDICTED: pectinesterase 3-like [Malus domestica]
jujube_newGene_1595	--	61.3135	137.677	247.393	12.1653	15.721	5.95841	3.0433e-15	-3.72973185292845	down	--	--	--	--	--	--	--	--	conserved hypothetical protein [Ricinus communis]
gene2511	LOC107434297	2.08044	7.86408	6.29534	0	0.410689	0.846263	1.31403e-07	-3.74259796121627	down	--	--	Molecular Function: enzyme inhibitor activity (GO:0004857);; Cellular Component: extracellular region (GO:0005576);; Cellular Component: cell wall (GO:0005618);; Molecular Function: pectinesterase activity (GO:0030599);; Biological Process: cell wall modification (GO:0042545);; Biological Process: negative regulation of catalytic activity (GO:0043086);; Molecular Function: aspartyl esterase activ…	K01051|3.08232e-143|cit:102578056|PECS-1.1; pectinesterase (EC:3.1.1.11); K01051 pectinesterase [EC:3.1.1.11] (A)	Pentose and glucuronate interconversions (ko00040);; Starch and sucrose metabolism (ko00500)	Pectinesterase 3 (Precursor) OS=Citrus sinensis (Sweet orange) PE=1 SV=1	G	Carbohydrate transport and metabolism	pectin methylesterase, partial [Citrus bergamia]
gene15625	LOC107423719	3.56074	20.2771	39.1278	1.76453	0.535071	2.36903	1.43089e-07	-3.77979296068742	down	--	--	Cellular Component: plasma membrane (GO:0005886);;	--	--	--	S	Function unknown	PREDICTED: uncharacterized protein LOC101306460 [Fragaria vesca subsp. vesca]
gene16635	LOC107424823	2.91132	24.8981	74.1356	2.18357	1.57211	3.63574	1.25346e-06	-3.78250330627082	down	[TZDR]	Signal transduction mechanisms;; Cytoskeleton;; Cell cycle control, cell division, chromosome partitioning;; General function prediction only	Molecular Function: oxidoreductase activity (GO:0016491);;	K13448|2.32358e-82|pper:PRUPE_ppa016099mg|hypothetical protein; K13448 calcium-binding protein CML (A)	Plant-pathogen interaction (ko04626)	Probable calcium-binding protein CML41 GN=CML41 OS=Arabidopsis thaliana (Mouse-ear cress) PE=2 SV=2	T	Signal transduction mechanisms	hypothetical protein PRUPE_ppa016099mg [Prunus persica]
gene24605	LOC107433480	53.462	113.414	237.475	8.33428	8.37287	12.8461	1.45876e-17	-3.80545704356	down	--	--	--	--	--	--	R	General function prediction only	PREDICTED: extensin-2-like [Camelina sativa]
gene14294	LOC107422269	36.2823	463.997	418.173	45.4932	13.392	6.94807	8.3498e-07	-3.81090168362502	down	--	--	Biological Process: defense response (GO:0006952);; Biological Process: response to biotic stimulus (GO:0009607);;	--	--	Major allergen Pru av 1 GN=PRUA1 OS=Prunus avium (Cherry) PE=1 SV=1	S	Function unknown	pollen allergen Ziz j 1 [Ziziphus jujuba]
jujube_newGene_2774	--	63.4298	68.0039	356.581	11.4172	11.8531	9.10599	9.30819e-10	-3.81255068803376	down	[R]	General function prediction only	Molecular Function: catalytic activity (GO:0003824);; Cellular Component: peroxisome (GO:0005777);; Biological Process: metabolic process (GO:0008152);;	--	--	--	I	Lipid transport and metabolism	Epoxide hydrolase 2 [Glycine soja]
gene3740	LOC107410779	1.52634	1.69498	5.3972	0.16296	0.0549675	0.410376	3.97354e-08	-3.82195548694556	down	--	--	--	--	--	BURP domain-containing protein 3 (Precursor) OS=Oryza sativa subsp. japonica (Rice) PE=2 SV=1	R	General function prediction only	hypothetical protein PRUPE_ppa008862mg [Prunus persica]
gene3022	LOC107407013	5.72054	7.27682	28.7938	0.834913	0.875847	1.21913	1.11137e-11	-3.83803791733047	down	--	--	Molecular Function: transferase activity, transferring glycosyl groups (GO:0016757);;	K13691|0|vvi:100242294|	--	UDP-glycosyltransferase 74F2 GN=F18O19.7 OS=Arabidopsis thaliana (Mouse-ear cress) PE=1 SV=1	CG	Energy production and conversion;; Carbohydrate transport and metabolism	UDP-glycosyltransferase 74F2 [Morus notabilis]
gene26999	LOC107403362	1.58633	27.196	94.4513	2.76431	1.99817	3.7076	1.85341e-05	-3.84727266822619	down	--	--	--	--	--	Blue copper protein (Precursor) GN=F5O24.120 OS=Arabidopsis thaliana (Mouse-ear cress) PE=1 SV=2	R	General function prediction only	Blue copper protein [Morus notabilis]
gene19531	LOC107427935	5.26387	58.6449	84.0806	4.8257	2.39307	4.89908	5.02108e-08	-3.86275276091713	down	--	--	--	K00430|0|vvi:100249751|peroxidase 55-like; K00430 peroxidase [EC:1.11.1.7] (A)	Phenylalanine metabolism (ko00360);; Phenylpropanoid biosynthesis (ko00940)	Peroxidase 55 (Precursor) GN=MUA22.13 OS=Arabidopsis thaliana (Mouse-ear cress) PE=1 SV=1	G	Carbohydrate transport and metabolism	PREDICTED: peroxidase 55-like [Vitis vinifera]
gene27006	LOC107403357	107.344	567.987	1156.9	36.0343	29.9302	59.9998	1.94315e-10	-3.86673013677705	down	--	--	--	--	--	Stellacyanin OS=Toxicodendron vernicifluum (Japanese lacquer tree) PE=1 SV=1	R	General function prediction only	Blue copper protein [Morus notabilis]
gene4518	LOC107411586	1.62519	9.25268	26.6901	0.997472	0.460037	1.12297	1.17019e-07	-3.89089290751522	down	[Q]	Secondary metabolites biosynthesis, transport and catabolism	Molecular Function: iron ion binding (GO:0005506);; Cellular Component: endoplasmic reticulum (GO:0005783);; Cellular Component: plasma membrane (GO:0005886);; Molecular Function: electron carrier activity (GO:0009055);; Biological Process: response to light stimulus (GO:0009416);; Cellular Component: plant-type cell wall (GO:0009505);; Biological Process: pollen development (GO:0009555);; Biolog…	K00487|0|cmo:103496249|c4H; trans-cinnamate 4-monooxygenase; K00487 trans-cinnamate 4-monooxygenase [EC:1.14.13.11] (A)	Ubiquinone and other terpenoid-quinone biosynthesis (ko00130);; Phenylalanine metabolism (ko00360);; Phenylpropanoid biosynthesis (ko00940);; Flavonoid biosynthesis (ko00941);; Stilbenoid, diarylheptanoid and gingerol biosynthesis (ko00945);; Degradation of aromatic compounds (ko01220)	Trans-cinnamate 4-monooxygenase GN=CYP73A14 OS=Glycyrrhiza echinata (Licorice) PE=2 SV=1	Q	Secondary metabolites biosynthesis, transport and catabolism	hypothetical protein JCGZ_17318 [Jatropha curcas]
gene1264	LOC107420411	2.68995	19.3912	69.8649	1.26497	1.97363	2.81071	5.02528e-07	-3.92378273279517	down	--	--	Molecular Function: transporter activity (GO:0005215);; Biological Process: transport (GO:0006810);; Cellular Component: integral component of membrane (GO:0016021);;	K15283|0|gmx:100804205|glucose-6-phosphate/phosphate translocator 2, chloroplastic-like; K15283 solute carrier family 35, member E1 (A)	--	Glucose-6-phosphate/phosphate translocator 2, chloroplastic (Precursor) GN=GPT2 OS=Arabidopsis thaliana (Mouse-ear cress) PE=2 SV=2	G	Carbohydrate transport and metabolism	Glucose-6-phosphate/phosphate translocator 2, chloroplastic -like protein [Gossypium arboreum]
gene26927	LOC107403288	158.951	553.435	910.709	41.4149	21.5211	45.5944	5.08694e-15	-3.93138976167337	down	[Q]	Secondary metabolites biosynthesis, transport and catabolism	Molecular Function: binding (GO:0005488);; Molecular Function: oxidoreductase activity (GO:0016491);;	--	--	Beta-amyrin 28-oxidase OS=Panax ginseng (Korean ginseng) PE=2 SV=1	Q	Secondary metabolites biosynthesis, transport and catabolism	PREDICTED: cytochrome P450 716B2-like [Fragaria vesca subsp. vesca]
gene18309	LOC107426663	9.01518	56.9266	132.649	4.77266	3.74529	4.32189	1.07386e-09	-3.95817965446429	down	[CR]	Energy production and conversion;; General function prediction only	--	--	--	Putative quinone-oxidoreductase homolog, chloroplastic GN=At4g13010 OS=Arabidopsis thaliana (Mouse-ear cress) PE=2 SV=1	Q	Secondary metabolites biosynthesis, transport and catabolism	hypothetical protein PRUPE_ppa008401mg [Prunus persica]
gene18026	LOC107426290	6.53574	8.53054	44.1162	1.29612	1.42096	0.994408	2.84043e-10	-4.0246591250315	down	[R]	General function prediction only	Biological Process: metabolic process (GO:0008152);; Molecular Function: hydrolase activity (GO:0016787);;	--	--	--	I	Lipid transport and metabolism	hypothetical protein PRUPE_ppa008875mg [Prunus persica]
gene28530	LOC107405029	7.69152	10.275	43.0568	1.60433	0.833094	1.48135	1.67749e-10	-4.03194600701644	down	[R]	General function prediction only	Molecular Function: epoxide hydrolase activity (GO:0004301);; Cellular Component: peroxisome (GO:0005777);; Biological Process: metabolic process (GO:0008152);;	--	--	--	I	Lipid transport and metabolism	hypothetical protein PRUPE_ppa008875mg [Prunus persica]
gene2480	LOC107433848	5.96532	8.84828	27.952	1.5032	0.772786	0.38983	7.1234e-11	-4.03912470319991	down	--	--	Molecular Function: hydrolase activity, acting on ester bonds (GO:0016788);;	--	--	GDSL esterase/lipase 2 (Precursor) GN=GLIP2 OS=Arabidopsis thaliana (Mouse-ear cress) PE=2 SV=1	I	Lipid transport and metabolism	GDSL esterase/lipase 1 [Morus notabilis]
gene1951	LOC107428050	0.334755	1.39337	2.38197	0.0177652	0.0724173	0.169227	1.02061e-07	-4.05187722783509	down	[RTKL]	General function prediction only;; Signal transduction mechanisms;; Transcription;; Replication, recombination and repair	Molecular Function: nucleotide binding (GO:0000166);; Molecular Function: protein kinase activity (GO:0004672);; Cellular Component: membrane (GO:0016020);; Biological Process: phosphorylation (GO:0016310);; Molecular Function: oxidoreductase activity (GO:0016491);;	--	--	Probable LRR receptor-like serine/threonine-protein kinase At3g47570 (Precursor) GN=At3g47570 OS=Arabidopsis thaliana (Mouse-ear cress) PE=2 SV=1	T	Signal transduction mechanisms	putative LRR receptor-like serine/threonine-protein kinase [Morus notabilis]
gene24195	LOC107433022	1.02794	4.53165	8.23714	0.379179	0.242805	0.232045	4.19085e-10	-4.05430641636645	down	[HE]	Coenzyme transport and metabolism;; Amino acid transport and metabolism	Molecular Function: phosphoglycerate dehydrogenase activity (GO:0004617);; Cellular Component: nucleus (GO:0005634);; Cellular Component: cytosol (GO:0005829);; Biological Process: L-serine biosynthetic process (GO:0006564);; Biological Process: tryptophan catabolic process (GO:0006569);; Biological Process: protein targeting to membrane (GO:0006612);; Cellular Component: chloroplast stroma (GO:0…	K00058|0|fve:101310343|d-3-phosphoglycerate dehydrogenase, chloroplastic-like; K00058 D-3-phosphoglycerate dehydrogenase [EC:1.1.1.95] (A)	Glycine, serine and threonine metabolism (ko00260);; Carbon metabolism (ko01200);; Biosynthesis of amino acids (ko01230)	D-3-phosphoglycerate dehydrogenase 2, chloroplastic (Precursor) GN=F11A6.8 OS=Arabidopsis thaliana (Mouse-ear cress) PE=1 SV=2	E	Amino acid transport and metabolism	PREDICTED: d-3-phosphoglycerate dehydrogenase, chloroplastic-like [Fragaria vesca subsp. vesca]
gene14306	LOC107422287	12.9431	274.589	150.565	14.7639	9.22099	2.48516	7.42014e-07	-4.06820179992036	down	--	--	Biological Process: defense response (GO:0006952);; Biological Process: response to biotic stimulus (GO:0009607);;	--	--	Major allergen Pru av 1 GN=PRUA1 OS=Prunus avium (Cherry) PE=1 SV=1	S	Function unknown	pollen allergen Ziz j 1 [Ziziphus jujuba]
gene30106	LOC107406730	22.2798	102.644	284.69	11.8625	7.38828	5.90383	4.5927e-10	-4.07895438626724	down	--	--	Molecular Function: enzyme inhibitor activity (GO:0004857);; Cellular Component: cell wall (GO:0005618);; Cellular Component: membrane (GO:0016020);; Molecular Function: pectinesterase activity (GO:0030599);; Biological Process: cell wall modification (GO:0042545);; Biological Process: negative regulation of catalytic activity (GO:0043086);; Molecular Function: aspartyl esterase activity (GO:0045…	K01051|3.09945e-120|vvi:100255703|pectinesterase 2; K01051 pectinesterase [EC:3.1.1.11] (A)	Pentose and glucuronate interconversions (ko00040);; Starch and sucrose metabolism (ko00500)	Pectinesterase 17 (Precursor) GN=F4L23.27 OS=Arabidopsis thaliana (Mouse-ear cress) PE=2 SV=2	G	Carbohydrate transport and metabolism	PREDICTED: pectinesterase 2 [Vitis vinifera]
gene24712	LOC107433620	1.47344	15.3481	37.3931	1.93862	0.610139	0.65993	1.71703e-06	-4.10179739947373	down	--	--	--	--	--	--	S	Function unknown	hypothetical protein L484_006444 [Morus notabilis]
gene1830	LOC107427017	11.9876	76.7928	404.334	16.4243	5.7177	5.91608	1.33206e-06	-4.15515491134741	down	[G]	Carbohydrate transport and metabolism	Molecular Function: chitinase activity (GO:0004568);; Biological Process: carbohydrate metabolic process (GO:0005975);; Biological Process: chitin catabolic process (GO:0006032);;	K01183|4.89412e-178|pper:PRUPE_ppa007396mg|hypothetical protein; K01183 chitinase [EC:3.2.1.14] (A)	Amino sugar and nucleotide sugar metabolism (ko00520)	--	G	Carbohydrate transport and metabolism	hypothetical protein PRUPE_ppa007396mg [Prunus persica]
gene2930	LOC107406019	3.57671	46.8147	77.3378	1.92361	1.3371	3.91675	7.16348e-08	-4.16676661871635	down	--	--	Biological Process: respiratory burst involved in defense response (GO:0002679);; Molecular Function: chitinase activity (GO:0004568);; Cellular Component: extracellular region (GO:0005576);; Cellular Component: cell wall (GO:0005618);; Biological Process: carbohydrate metabolic process (GO:0005975);; Biological Process: chitin catabolic process (GO:0006032);; Molecular Function: chitin binding (…	K01183|2.74752e-159|mdm:103432770|endochitinase PR4-like; K01183 chitinase [EC:3.2.1.14] (A)	Amino sugar and nucleotide sugar metabolism (ko00520)	Endochitinase PR4 (Precursor) GN=CHI4 OS=Phaseolus vulgaris (Kidney bean) PE=2 SV=1	G	Carbohydrate transport and metabolism	PREDICTED: endochitinase PR4-like [Malus domestica]
gene21608	LOC107430205	0.918557	14.2803	28.3267	0.798631	0.67729	0.800472	8.82467e-08	-4.18919094620956	down	[E]	Amino acid transport and metabolism	Molecular Function: 1-aminocyclopropane-1-carboxylate synthase activity (GO:0016847);; Molecular Function: pyridoxal phosphate binding (GO:0030170);; Biological Process: 1-aminocyclopropane-1-carboxylate biosynthetic process (GO:0042218);;	K01762|0|mdm:103439201|MdACS-5B; 1-aminocyclopropane-1-carboxylate synthase (EC:4.4.1.14); K01762 1-aminocyclopropane-1-carboxylate synthase [EC:4.4.1.14] (A)	Cysteine and methionine metabolism (ko00270)	1-aminocyclopropane-1-carboxylate synthase GN=ACS1 OS=Glycine max (Soybean) PE=2 SV=1	E	Amino acid transport and metabolism	1-aminocyclopropane-1-carboxylate synthase [Malus domestica]
gene4154	LOC107411221	1.32973	8.2957	21.6345	0.846837	0.476564	0.454083	4.91899e-08	-4.19307621253102	down	[I]	Lipid transport and metabolism	Biological Process: metabolic process (GO:0008152);; Molecular Function: hydrolase activity (GO:0016787);;	--	--	Probable carboxylesterase 13 GN=CXE13 OS=Arabidopsis thaliana (Mouse-ear cress) PE=1 SV=1	V	Defense mechanisms	putative carboxylesterase 13 [Morus notabilis]
gene2024	LOC107428812	1.32432	1.43126	11.0823	0.0595561	0.309324	0.40132	3.55933e-07	-4.19915418040547	down	[E]	Amino acid transport and metabolism	Cellular Component: plasma membrane (GO:0005886);; Biological Process: oligopeptide transport (GO:0006857);; Biological Process: response to nitrate (GO:0010167);; Molecular Function: nitrate transmembrane transporter activity (GO:0015112);; Biological Process: nitrate transport (GO:0015706);; Biological Process: response to cadmium ion (GO:0046686);;	K14638|0|tcc:TCM_042339|Nitrate transporter 1.5; K14638 solute carrier family 15 (peptide/histidine transporter), member 3/4 (A)	--	Protein NRT1/ PTR FAMILY 7.3 GN=F5D14.23 OS=Arabidopsis thaliana (Mouse-ear cress) PE=1 SV=2	P	Inorganic ion transport and metabolism	Nitrate transporter 1.5 [Theobroma cacao]
gene1864	LOC107427342	1.81476	11.3391	31.1994	0.93235	0.382989	1.14241	5.57332e-08	-4.21551736037579	down	[G]	Carbohydrate transport and metabolism	Molecular Function: hydrolase activity, hydrolyzing O-glycosyl compounds (GO:0004553);; Biological Process: organic substance metabolic process (GO:0071704);;	K01183|8.39661e-160|pper:PRUPE_ppa020347mg|hypothetical protein; K01183 chitinase [EC:3.2.1.14] (A)	Amino sugar and nucleotide sugar metabolism (ko00520)	--	G	Carbohydrate transport and metabolism	hypothetical protein PRUPE_ppa020347mg [Prunus persica]
gene1898	LOC107427628	3.94808	26.687	77.253	1.56797	1.80234	2.73997	1.27845e-08	-4.22543914604972	down	[R]	General function prediction only	Molecular Function: oxidoreductase activity (GO:0016491);; Biological Process: oxidation-reduction process (GO:0055114);;	--	--	Non-functional NADPH-dependent codeinone reductase 2 GN=COR2 OS=Papaver somniferum (Opium poppy) PE=1 SV=1	R	General function prediction only	hypothetical protein PRUPE_ppa008529mg [Prunus persica]
gene6278	LOC107413497	14.0946	35.949	66.8919	1.3733	3.09623	1.58084	4.81107e-16	-4.27873722664509	down	[G]	Carbohydrate transport and metabolism	--	K09873|9.64361e-164|pper:PRUPE_ppa010364mg|hypothetical protein; K09873 aquaporin TIP (A)	--	Aquaporin TIP1-3, N-terminally processed GN=TIP1-3 OS=Arabidopsis thaliana (Mouse-ear cress) PE=1 SV=1	G	Carbohydrate transport and metabolism	hypothetical protein PRUPE_ppa010364mg [Prunus persica]
gene14295	LOC107422270	6.74115	192.767	137.599	8.46287	5.39892	3.2436	8.69528e-08	-4.3269001934999	down	--	--	Biological Process: defense response (GO:0006952);; Biological Process: response to biotic stimulus (GO:0009607);;	--	--	Major allergen Pru av 1 GN=PRUA1 OS=Prunus avium (Cherry) PE=1 SV=1	S	Function unknown	pollen allergen Ziz j 1 [Ziziphus jujuba]
gene16363	LOC107424513	2.30669	7.64675	14.8156	0.541	0.225416	0.47157	9.56182e-12	-4.38153744506332	down	--	--	--	--	--	Uncharacterized acetyltransferase At3g50280 GN=At3g50280 OS=Arabidopsis thaliana (Mouse-ear cress) PE=3 SV=1	S	Function unknown	PREDICTED: uncharacterized acetyltransferase At3g50280-like [Prunus mume]
gene10885	LOC107418517	34.4458	44.1722	122.825	3.11029	3.26706	3.07371	4.316e-20	-4.41223494654413	down	--	--	Molecular Function: serine-type endopeptidase inhibitor activity (GO:0004867);; Biological Process: metabolic process (GO:0008152);;	--	--	Bowman-Birk type proteinase inhibitor {ECO:0000303|PubMed:18474386} OS=Lupinus albus (White lupin) PE=1 SV=1	R	General function prediction only	Trypsin inhibitor [Medicago truncatula]
gene24402	LOC107433229	3.93635	31.0626	47.3163	1.35229	1.11653	1.36758	4.19633e-11	-4.42290722433787	down	--	--	--	--	--	Pathogenesis-related protein STH-2 GN=STH-2 OS=Solanum tuberosum (Potato) PE=2 SV=1	S	Function unknown	PREDICTED: major allergen Pru ar 1-like [Pyrus x bretschneideri]
gene347	LOC107411015	3.2671	6.82193	28.0361	0.936677	0.488955	0.29382	4.81312e-10	-4.4501295561254	down	[QR]	Secondary metabolites biosynthesis, transport and catabolism;; General function prediction only	--	--	--	Trans-resveratrol di-O-methyltransferase GN=ROMT OS=Vitis vinifera (Grape) PE=1 SV=2	R	General function prediction only	PREDICTED: trans-resveratrol di-O-methyltransferase-like [Pyrus x bretschneideri]
gene14307	LOC107422291	32.8741	349.22	333.754	17.6344	6.29707	8.60946	5.8499e-11	-4.47367601407971	down	--	--	Biological Process: defense response (GO:0006952);; Biological Process: response to biotic stimulus (GO:0009607);;	--	--	Major allergen Pru av 1 GN=PRUA1 OS=Prunus avium (Cherry) PE=1 SV=1	S	Function unknown	pollen allergen Ziz j 1 [Ziziphus jujuba]
gene4162	LOC107411191	0.869607	3.38948	6.40487	0.486597	1.70978e-17	1.50572e-09	4.41061e-06	-4.490983989449	down	--	--	--	--	--	--	S	Function unknown	conserved hypothetical protein [Ricinus communis]
gene14833	LOC107422872	5.44834	7.41716	29.4655	0.568094	0.391541	0.926167	2.94301e-11	-4.56338501069691	down	[O]	Posttranslational modification, protein turnover, chaperones	Molecular Function: transferase activity (GO:0016740);;	K00799|5.21544e-90|pop:POPTR_0010s08170g|hypothetical protein; K00799 glutathione S-transferase [EC:2.5.1.18] (A)	Glutathione metabolism (ko00480)	Probable glutathione S-transferase GN=HSP26-A OS=Glycine max (Soybean) PE=2 SV=1	O	Posttranslational modification, protein turnover, chaperones	hypothetical protein POPTR_0010s08170g [Populus trichocarpa]
gene3191	LOC107409192	1.26794	8.68073	28.0047	0.683163	0.238665	0.61606	8.16325e-09	-4.58996961395211	down	[V]	Defense mechanisms	Molecular Function: ATP binding (GO:0005524);; Biological Process: ATP catabolic process (GO:0006200);; Molecular Function: organic phosphonate transmembrane-transporting ATPase activity (GO:0015416);; Cellular Component: membrane (GO:0016020);;	--	--	Pleiotropic drug resistance protein 1 GN=PDR1 OS=Nicotiana tabacum (Common tobacco) PE=2 SV=1	Q	Secondary metabolites biosynthesis, transport and catabolism	PREDICTED: pleiotropic drug resistance protein 1-like [Vitis vinifera]
gene14583	LOC107422596	22.7237	34.2732	126.863	4.67564	1.9458	1.06323	8.3319e-13	-4.60521859488647	down	[Q]	Secondary metabolites biosynthesis, transport and catabolism	Biological Process: flavonoid biosynthetic process (GO:0009813);; Molecular Function: naringenin-chalcone synthase activity (GO:0016210);;	K00660|0|tcc:TCM_020384|Chalcone and stilbene synthase family protein; K00660 chalcone synthase [EC:2.3.1.74] (A)	Flavonoid biosynthesis (ko00941);; Circadian rhythm - plant (ko04712)	Chalcone synthase 1 GN=CHS1 OS=Camellia sinensis (Tea) PE=2 SV=1	H	Coenzyme transport and metabolism	Chalcone and stilbene synthase family protein [Theobroma cacao]
gene10983	LOC107418648	5.18175	45.2086	38.5616	1.21842	0.478184	2.01605	2.94343e-11	-4.6103533760212	down	--	--	--	--	--	Probable S-adenosylmethionine-dependent methyltransferase At5g38100 GN=At5g38100 OS=Arabidopsis thaliana (Mouse-ear cress) PE=2 SV=1	S	Function unknown	putative S-adenosylmethionine-dependent methyltransferase [Morus notabilis]
gene15410	LOC107423518	2.12968	3.9398	5.73545	0.0616343	0	0.422769	9.23132e-12	-4.62235712851851	down	--	--	--	--	--	Rhodanese-like domain-containing protein 6 GN=STR6 OS=Arabidopsis thaliana (Mouse-ear cress) PE=2 SV=1	E	Amino acid transport and metabolism	PREDICTED: dihydrofolate reductase-like [Populus euphratica]
gene2569	LOC107435117	31.3616	90.1182	271.268	4.50571	4.69807	6.06422	1.85295e-15	-4.68579888516698	down	[IR]	Lipid transport and metabolism;; General function prediction only	Biological Process: response to fungus (GO:0009620);; Biological Process: response to ethylene (GO:0009723);; Molecular Function: hydrolase activity, acting on ester bonds (GO:0016788);; Biological Process: defense response to bacterium (GO:0042742);; Biological Process: response to oxygen-containing compound (GO:1901700);;	--	--	GDSL esterase/lipase 1 (Precursor) GN=GLIP1 OS=Arabidopsis thaliana (Mouse-ear cress) PE=1 SV=1	I	Lipid transport and metabolism	PREDICTED: GDSL esterase/lipase 2-like [Prunus mume]
gene4265	LOC107411328	2.28247	7.45628	18.8176	0.40568	0.158769	0.59929	2.99098e-10	-4.70299348084378	down	--	--	--	--	--	LOB domain-containing protein 11 GN=T17D12.6 OS=Arabidopsis thaliana (Mouse-ear cress) PE=2 SV=2	S	Function unknown	PREDICTED: LOB domain-containing protein 1-like [Prunus mume]
gene32853	LOC107409707	2.53231	30.7161	44.5276	1.23064	0.910829	0.778038	3.48086e-10	-4.77643582737947	down	--	--	--	--	--	Dirigent protein 21 (Precursor) GN=DIR21 OS=Arabidopsis thaliana (Mouse-ear cress) PE=3 SV=1	R	General function prediction only	unnamed protein product [Coffea canephora]
gene25243	LOC107434180	10.4863	220.725	279.496	8.44331	3.57922	6.05474	1.28131e-09	-4.82341366638971	down	[Q]	Secondary metabolites biosynthesis, transport and catabolism	Molecular Function: binding (GO:0005488);; Molecular Function: oxidoreductase activity (GO:0016491);;	--	--	Beta-amyrin 28-oxidase OS=Panax ginseng (Korean ginseng) PE=2 SV=1	Q	Secondary metabolites biosynthesis, transport and catabolism	PREDICTED: cytochrome P450 716B2-like [Fragaria vesca subsp. vesca]
gene11017	LOC107418707	4.37086	7.69211	25.1316	0.592637	0.353711	0.427008	3.63127e-14	-4.82762859492999	down	--	--	--	--	--	Probable S-adenosylmethionine-dependent methyltransferase At5g38100 GN=At5g38100 OS=Arabidopsis thaliana (Mouse-ear cress) PE=2 SV=1	S	Function unknown	PREDICTED: probable S-adenosylmethionine-dependent methyltransferase At5g38100 [Prunus mume]
gene3386	LOC107410391	1.91951	5.30795	16.5863	0.285433	0.158074	0.379316	1.24272e-13	-4.88187410931463	down	[F]	Nucleotide transport and metabolism	--	K09842|0|pmum:103330122|abscisic-aldehyde oxidase-like; K09842 abscisic-aldehyde oxidase [EC:1.2.3.14] (A)	Carotenoid biosynthesis (ko00906)	Indole-3-acetaldehyde oxidase GN=F22D1.130 OS=Arabidopsis thaliana (Mouse-ear cress) PE=1 SV=2	F	Nucleotide transport and metabolism	PREDICTED: abscisic-aldehyde oxidase-like isoform X1 [Prunus mume]
gene9389	LOC107416899	2.35634	17.0465	27.7653	0.238943	0.416703	0.938198	1.91354e-10	-4.94862650853603	down	--	--	Molecular Function: calcium ion binding (GO:0005509);; Biological Process: response to auxin (GO:0009733);; Biological Process: response to karrikin (GO:0080167);;	--	--	Calcium-binding protein PBP1 GN=F24B18.11 OS=Arabidopsis thaliana (Mouse-ear cress) PE=1 SV=1	DZ	Cell cycle control, cell division, chromosome partitioning;; Cytoskeleton	PREDICTED: calcium-binding protein PBP1-like [Malus domestica]
gene12197	LOC107419963	0.695509	7.0496	16.4073	0.295895	0.074382	0.456417	3.39689e-08	-4.94968579020021	down	--	--	--	--	--	Uncharacterized acetyltransferase At3g50280 GN=At3g50280 OS=Arabidopsis thaliana (Mouse-ear cress) PE=3 SV=1	S	Function unknown	HXXXD-type acyl-transferase family protein [Theobroma cacao]
gene11466	LOC107419176	0.402918	2.0888	7.13343	0.0954821	0.0759233	0.159694	9.83669e-10	-4.96374106482203	down	[RTKL]	General function prediction only;; Signal transduction mechanisms;; Transcription;; Replication, recombination and repair	Biological Process: MAPK cascade (GO:0000165);; Biological Process: respiratory burst involved in defense response (GO:0002679);; Molecular Function: protein serine/threonine kinase activity (GO:0004674);; Molecular Function: phosphoprotein phosphatase activity (GO:0004721);; Molecular Function: ATP binding (GO:0005524);; Cellular Component: mitochondrion (GO:0005739);; Biological Process: protei…	--	--	Probable LRR receptor-like serine/threonine-protein kinase At1g74360 (Precursor) GN=At1g74360 OS=Arabidopsis thaliana (Mouse-ear cress) PE=2 SV=1	T	Signal transduction mechanisms	PREDICTED: probable LRR receptor-like serine/threonine-protein kinase At1g74360 [Prunus mume]
gene15917	LOC107424087	1.67026	2.78956	49.8234	0.686494	0.252003	0.766108	1.20477e-06	-5.02552546336534	down	[C]	Energy production and conversion	Molecular Function: FMN binding (GO:0010181);; Molecular Function: 12-oxophytodienoate reductase activity (GO:0016629);; Biological Process: oxidation-reduction process (GO:0055114);;	K05894|0|fve:101292447|12-oxophytodienoate reductase 3-like; K05894 12-oxophytodienoic acid reductase [EC:1.3.1.42] (A)	alpha-Linolenic acid metabolism (ko00592)	12-oxophytodienoate reductase 3 GN=OPR3 OS=Solanum lycopersicum (Tomato) PE=1 SV=1	C	Energy production and conversion	12-oxophytodienoate reductase 3 [Morus notabilis]
gene27789	LOC107404213	0.720124	6.09816	18.1268	0.137795	0.203608	0.430951	6.54139e-09	-5.03100514227266	down	[E]	Amino acid transport and metabolism	Cellular Component: cytoplasm (GO:0005737);; Biological Process: L-phenylalanine catabolic process (GO:0006559);; Biological Process: cinnamic acid biosynthetic process (GO:0009800);; Molecular Function: phenylalanine ammonia-lyase activity (GO:0045548);;	K10775|0|rcu:RCOM_1355480|Phenylalanine ammonia-lyase, putative (EC:4.3.1.24); K10775 phenylalanine ammonia-lyase [EC:4.3.1.24] (A)	Phenylalanine metabolism (ko00360);; Phenylpropanoid biosynthesis (ko00940)	Phenylalanine ammonia-lyase GN=PAL OS=Camellia sinensis (Tea) PE=2 SV=1	Q	Secondary metabolites biosynthesis, transport and catabolism	phenylalanine ammonia lyase [Jatropha curcas]
gene25572	LOC107434542	0.456097	2.09672	5.80256	0.122408	0.0416309	0.10683	5.80619e-10	-5.05277492141502	down	--	--	--	K13457|0|tcc:TCM_016632|Nbs-lrr resistance protein; K13457 disease resistance protein RPM1 (A)	Plant-pathogen interaction (ko04626)	Disease resistance protein RPM1 GN=F17A9.20 OS=Arabidopsis thaliana (Mouse-ear cress) PE=1 SV=1	T	Signal transduction mechanisms	PREDICTED: disease resistance protein RPM1-like [Populus euphratica]
gene12491	LOC107420297	1.31187	1.10099	5.77967	0.128983	0.064534	0.0612367	5.58673e-11	-5.08704504838432	down	[Q]	Secondary metabolites biosynthesis, transport and catabolism	Molecular Function: monooxygenase activity (GO:0004497);; Molecular Function: oxidoreductase activity, acting on paired donors, with incorporation or reduction of molecular oxygen (GO:0016705);; Molecular Function: metal ion binding (GO:0046872);;	--	--	Cytochrome P450 82A3 GN=CYP82A3 OS=Glycine max (Soybean) PE=2 SV=1	Q	Secondary metabolites biosynthesis, transport and catabolism	Cytochrome P450 82A3 [Morus notabilis]
gene6279	LOC107413511	1.85034	11.8793	41.1745	0.211851	0.652747	0.692831	1.21568e-09	-5.18782517865778	down	--	--	--	--	--	F-box protein At2g39490 GN=At2g39490 OS=Arabidopsis thaliana (Mouse-ear cress) PE=2 SV=1	R	General function prediction only	hypothetical protein L484_025399 [Morus notabilis]
gene19673	LOC107428092	1.74584	19.4186	67.0172	0.949523	0.587946	0.89085	3.32248e-09	-5.20118148551861	down	--	--	--	--	--	Polygalacturonase QRT3 (Precursor) GN=QRT3 OS=Arabidopsis thaliana (Mouse-ear cress) PE=2 SV=1	R	General function prediction only	PREDICTED: polygalacturonase QRT3-like [Pyrus x bretschneideri]
gene10479	LOC107418084	0.840564	1.33128	44.3289	1.06619	0	0.173219	0.000174539	-5.24236096614886	down	--	--	--	K15382|4.28952e-81|rcu:RCOM_1504890|hypothetical protein; K15382 solute carrier family 50 (sugar transporter) (A)	--	Bidirectional sugar transporter SWEET12 GN=MQM1.8 OS=Arabidopsis thaliana (Mouse-ear cress) PE=1 SV=1	R	General function prediction only	conserved hypothetical protein [Ricinus communis]
gene14309	LOC107422288	31.3006	378.641	303.477	10.9174	3.76469	4.05793	7.17387e-13	-5.24849331662041	down	--	--	Biological Process: defense response (GO:0006952);; Biological Process: response to biotic stimulus (GO:0009607);;	--	--	Major allergen Pru av 1 GN=PRUA1 OS=Prunus avium (Cherry) PE=1 SV=1	S	Function unknown	pollen allergen Ziz j 1 [Ziziphus jujuba]
gene31768	LOC107408521	11.2612	85.1912	257.902	3.59458	1.85476	4.05272	2.27341e-11	-5.26521704715996	down	--	--	Molecular Function: ATP binding (GO:0005524);; Biological Process: ATP catabolic process (GO:0006200);; Molecular Function: organic phosphonate transmembrane-transporting ATPase activity (GO:0015416);; Cellular Component: membrane (GO:0016020);;	--	--	Pleiotropic drug resistance protein 1 GN=PDR1 OS=Nicotiana tabacum (Common tobacco) PE=2 SV=1	Q	Secondary metabolites biosynthesis, transport and catabolism	PREDICTED: pleiotropic drug resistance protein 1-like [Vitis vinifera]
gene14304	LOC107422290	4.44718	173.498	76.9299	2.8479	2.26198	1.7995	1.78401e-09	-5.26723901841743	down	--	--	Biological Process: defense response (GO:0006952);; Biological Process: response to biotic stimulus (GO:0009607);;	--	--	Major allergen Mal d 1 OS=Malus domestica (Apple) PE=1 SV=3	S	Function unknown	pollen allergen Ziz j 1 [Ziziphus jujuba]
gene16699	LOC107424885	2.09942	56.0885	77.0046	0.614632	0.749879	2.12629	2.28131e-08	-5.30834890135867	down	--	--	--	--	--	--	R	General function prediction only	PREDICTED: uncharacterized protein LOC103428609 [Malus domestica]
gene21918	LOC107430585	1.18692	6.63699	18.2832	0.153046	0.0520082	0.434407	2.17799e-09	-5.39008201763471	down	--	--	--	--	--	--	S	Function unknown	PREDICTED: uncharacterized protein LOC101301013 [Fragaria vesca subsp. vesca]
gene13699	LOC107421637	8.8374	16.5819	72.5597	1.5543	0.500337	0.239395	1.17707e-11	-5.41561840699351	down	--	--	--	--	--	Pathogen-related protein OS=Hordeum vulgare (Barley) PE=2 SV=2	S	Function unknown	hypothetical protein POPTR_0005s21070g [Populus trichocarpa]
jujube_newGene_1428	--	8.53719	65.7312	173.867	1.73422	1.81909	2.12841	6.30366e-12	-5.44791019974644	down	--	--	Molecular Function: serine-type endopeptidase inhibitor activity (GO:0004867);; Biological Process: response to wounding (GO:0009611);;	--	--	Proteinase inhibitor OS=Linum usitatissimum (Flax) PE=1 SV=1	S	Function unknown	Inhibitor of trypsin and hageman factor [Medicago truncatula]
gene6886	LOC107414167	17.9662	84.1208	158.944	4.37104	1.42827	0.383916	9.39424e-12	-5.45185916984892	down	--	--	--	--	--	Dirigent protein 23 (Precursor) GN=DIR23 OS=Arabidopsis thaliana (Mouse-ear cress) PE=2 SV=1	R	General function prediction only	hypothetical protein VITISV_023979 [Vitis vinifera]
gene21069	LOC107429606	1.95593	7.28993	10.4887	0.0437121	0.174199	0.246646	5.28696e-15	-5.46669768760468	down	--	--	--	--	--	Phospholipase A1-IIgamma GN=DSEL OS=Arabidopsis thaliana (Mouse-ear cress) PE=1 SV=1	I	Lipid transport and metabolism	PREDICTED: phospholipase A1-IIgamma-like [Pyrus x bretschneideri]
jujube_newGene_1429	--	35.0899	242.899	554.01	11.5948	3.74779	3.2563	7.96128e-12	-5.4737901484374	down	--	--	--	--	--	Glu S.griseus protease inhibitor OS=Momordica charantia (Bitter gourd) PE=1 SV=1	R	General function prediction only	Glu S.griseus protease inhibitor [Morus notabilis]
gene17029	LOC107425264	11.5273	73.6969	236.321	3.4344	1.47826	2.37305	2.2996e-12	-5.48441052004837	down	[G]	Carbohydrate transport and metabolism	Molecular Function: sucrose alpha-glucosidase activity (GO:0004575);; Biological Process: carbohydrate metabolic process (GO:0005975);;	K01193|0|tcc:TCM_029039|Glycosyl hydrolases family 32 protein isoform 1; K01193 beta-fructofuranosidase [EC:3.2.1.26] (A)	Galactose metabolism (ko00052);; Starch and sucrose metabolism (ko00500)	Beta-fructofuranosidase, insoluble isoenzyme CWINV1 (Precursor) GN=MMM17.26 OS=Arabidopsis thaliana (Mouse-ear cress) PE=1 SV=1	G	Carbohydrate transport and metabolism	Glycosyl hydrolases family 32 protein isoform 1 [Theobroma cacao]
gene29703	LOC107406299	1.0325	9.56908	23.5337	0.604964	0	0.159368	7.48112e-08	-5.48896444360491	down	--	--	Biological Process: phenylpropanoid biosynthetic process (GO:0009699);; Molecular Function: 2'-hydroxyisoflavone reductase activity (GO:0047526);; Biological Process: oxidation-reduction process (GO:0055114);;	--	--	Isoeugenol synthase 1 GN=IGS1 OS=Petunia hybrida (Petunia) PE=1 SV=1	R	General function prediction only	propenylphenol synthase 1 [Larrea tridentata]
gene12238	LOC107420154	0.590138	7.07223	8.87401	0.0797816	0	0.290318	1.19351e-08	-5.54104983937442	down	--	--	Molecular Function: extracellular ligand-gated ion channel activity (GO:0005230);; Biological Process: transport (GO:0006810);; Cellular Component: membrane (GO:0016020);; Biological Process: single-organism process (GO:0044699);;	K05387|0|tcc:TCM_036849|Glutamate receptor 2.9; K05387 glutamate receptor, ionotropic, plant (A)	--	Glutamate receptor 2.7 (Precursor) GN=GLR2.7 OS=Arabidopsis thaliana (Mouse-ear cress) PE=2 SV=3	P	Inorganic ion transport and metabolism	Glutamate receptor 2.7 [Morus notabilis]
gene14308	LOC107422289	4.63556	103.078	67.4271	2.11151	0.570295	1.21878	1.16852e-10	-5.57041061396469	down	--	--	Biological Process: defense response (GO:0006952);; Biological Process: response to biotic stimulus (GO:0009607);;	--	--	Major allergen Pru av 1 GN=PRUA1 OS=Prunus avium (Cherry) PE=1 SV=1	S	Function unknown	pollen allergen Ziz j 1 [Ziziphus jujuba]
gene13864	LOC107421816	1.42881	15.7187	53.017	0.573684	0.294326	0.579613	4.56225e-10	-5.59986598371201	down	--	--	--	--	--	--	S	Function unknown	PREDICTED: uncharacterized protein LOC103933218 [Pyrus x bretschneideri]
gene452	LOC107411899	1.38413	2.38121	6.75825	0.15199	0	0.0514301	3.25065e-12	-5.69074570989753	down	[QR]	Secondary metabolites biosynthesis, transport and catabolism;; General function prediction only	Molecular Function: O-methyltransferase activity (GO:0008171);;	--	--	Trans-resveratrol di-O-methyltransferase GN=ROMT OS=Vitis vinifera (Grape) PE=1 SV=2	R	General function prediction only	PREDICTED: trans-resveratrol di-O-methyltransferase-like [Pyrus x bretschneideri]
gene11550	LOC107419261	8.01458	76.3665	160.723	2.8369	0.611439	1.01981	8.91018e-12	-5.78761773425594	down	[IQR]	Lipid transport and metabolism;; Secondary metabolites biosynthesis, transport and catabolism;; General function prediction only	Biological Process: metabolic process (GO:0008152);;	--	--	(-)-isopiperitenol/(-)-carveol dehydrogenase, mitochondrial (Precursor) OS=Mentha piperita (Peppermint) PE=1 SV=1	Q	Secondary metabolites biosynthesis, transport and catabolism	Momilactone A synthase [Morus notabilis]
gene24221	LOC107433056	1.08737	12.1127	23.6423	0	0.16286	0.508341	3.6824e-08	-5.8017945407472	down	[E]	Amino acid transport and metabolism	Cellular Component: cytoplasm (GO:0005737);; Biological Process: L-phenylalanine catabolic process (GO:0006559);; Biological Process: cinnamic acid biosynthetic process (GO:0009800);; Molecular Function: phenylalanine ammonia-lyase activity (GO:0045548);;	K10775|0|rcu:RCOM_1355480|Phenylalanine ammonia-lyase, putative (EC:4.3.1.24); K10775 phenylalanine ammonia-lyase [EC:4.3.1.24] (A)	Phenylalanine metabolism (ko00360);; Phenylpropanoid biosynthesis (ko00940)	Phenylalanine ammonia-lyase GN=PAL OS=Camellia sinensis (Tea) PE=2 SV=1	Q	Secondary metabolites biosynthesis, transport and catabolism	phenylalanine ammonia lyase [Jatropha curcas]
gene32641	LOC107409476	2.52477	13.3748	64.8651	1.02446	0.140622	0.266811	4.72708e-09	-5.84441512863302	down	--	--	--	--	--	Miraculin (Precursor) OS=Synsepalum dulcificum (Miracle fruit) PE=1 SV=3	R	General function prediction only	Alpha-amylase/subtilisin inhibitor [Morus notabilis]
gene27373	LOC107403765	3.56974	29.6685	64.0176	1.18599	0.193998	0.314973	3.69813e-11	-5.89911058392615	down	--	--	--	--	--	Uncharacterized protein At1g28695 (Precursor) GN=At1g28695 OS=Arabidopsis thaliana (Mouse-ear cress) PE=2 SV=1	S	Function unknown	hypothetical protein PRUPE_ppa018804mg [Prunus persica]
gene20869	LOC107429390	0.738901	8.93154	22.484	0.22867	0.066981	0.248552	2.65472e-10	-5.95918651373675	down	--	--	Molecular Function: acetylglucosaminyltransferase activity (GO:0008375);; Cellular Component: membrane (GO:0016020);;	--	--	--	S	Function unknown	hypothetical protein L484_015454 [Morus notabilis]
gene13843	LOC107421777	1.9273	14.8716	53.5218	0.467381	0	0.636969	4.81238e-09	-6.04744524477566	down	[R]	General function prediction only	--	--	--	Salicylic acid-binding protein 2 GN=SABP2 OS=Nicotiana tabacum (Common tobacco) PE=1 SV=1	R	General function prediction only	PREDICTED: salicylic acid-binding protein 2-like [Malus domestica]
gene16151	LOC107424313	2.69091	24.4138	21.5951	0.46188	0.103141	0.147006	9.44842e-15	-6.09648924076549	down	[R]	General function prediction only	Biological Process: polysaccharide catabolic process (GO:0000272);; Molecular Function: chitinase activity (GO:0004568);; Biological Process: chitin catabolic process (GO:0006032);; Biological Process: defense response (GO:0006952);; Molecular Function: chitin binding (GO:0008061);; Biological Process: cell wall macromolecule catabolic process (GO:0016998);;	K01183|2.14791e-170|pxb:103936531|endochitinase-like; K01183 chitinase [EC:3.2.1.14] (A)	Amino sugar and nucleotide sugar metabolism (ko00520)	Endochitinase (Precursor) OS=Pisum sativum (Garden pea) PE=2 SV=1	G	Carbohydrate transport and metabolism	PREDICTED: endochitinase-like [Pyrus x bretschneideri]
gene26313	LOC107435344	0.204914	1.68673	3.66636	0	0	0.0738621	3.13972e-09	-6.23353431458663	down	[V]	Defense mechanisms	Molecular Function: ATP binding (GO:0005524);; Cellular Component: mitochondrion (GO:0005739);; Cellular Component: plasma membrane (GO:0005886);; Biological Process: ATP catabolic process (GO:0006200);; Biological Process: systemic acquired resistance (GO:0009627);; Biological Process: response to abscisic acid (GO:0009737);; Biological Process: defense response to fungus, incompatible interacti…	--	--	ABC transporter G family member 36 GN=F23H11.19 OS=Arabidopsis thaliana (Mouse-ear cress) PE=1 SV=1	Q	Secondary metabolites biosynthesis, transport and catabolism	ABC-2 and Plant PDR ABC-type transporter family protein isoform 1 [Theobroma cacao]
gene26291	LOC107435326	0.265909	2.52105	4.65749	0.0684439	0.0115627	0.0220348	7.34873e-12	-6.27456447832691	down	[V]	Defense mechanisms	Molecular Function: ATP binding (GO:0005524);; Cellular Component: mitochondrion (GO:0005739);; Cellular Component: plasma membrane (GO:0005886);; Biological Process: ATP catabolic process (GO:0006200);; Biological Process: systemic acquired resistance (GO:0009627);; Biological Process: response to abscisic acid (GO:0009737);; Biological Process: defense response to fungus, incompatible interacti…	--	--	ABC transporter G family member 36 GN=F23H11.19 OS=Arabidopsis thaliana (Mouse-ear cress) PE=1 SV=1	Q	Secondary metabolites biosynthesis, transport and catabolism	ABC-2 and Plant PDR ABC-type transporter family protein isoform 1 [Theobroma cacao]
gene17197	LOC107425414	1.16291	15.0191	13.4289	0.0941223	0.19269	0.120745	1.02724e-14	-6.32952567213761	down	[E]	Amino acid transport and metabolism	Molecular Function: gamma-glutamyltransferase activity (GO:0003840);; Biological Process: glutathione catabolic process (GO:0006751);; Biological Process: response to oxidative stress (GO:0006979);; Cellular Component: plant-type cell wall (GO:0009505);; Molecular Function: glutathione gamma-glutamylcysteinyltransferase activity (GO:0016756);; Cellular Component: apoplast (GO:0048046);;	K18592|0|pper:PRUPE_ppa002642mg|hypothetical protein; K18592 gamma-glutamyltranspeptidase / glutathione hydrolase / leukotriene-C4 hydrolase [EC:2.3.2.2 3.4.19.13 3.4.19.14] (A)	Taurine and hypotaurine metabolism (ko00430);; Cyanoamino acid metabolism (ko00460);; Glutathione metabolism (ko00480);; Arachidonic acid metabolism (ko00590)	Gamma-glutamyltranspeptidase 1 (Precursor) GN=GGT1 OS=Arabidopsis thaliana (Mouse-ear cress) PE=2 SV=1	E	Amino acid transport and metabolism	hypothetical protein PRUPE_ppa002642mg [Prunus persica]
gene3078	LOC107407502	8.39251	228.42	297.783	3.65692	1.26258	2.16866	5.95948e-12	-6.35898750336909	down	--	--	Molecular Function: hydrolase activity, hydrolyzing O-glycosyl compounds (GO:0004553);; Biological Process: carbohydrate metabolic process (GO:0005975);; Cellular Component: anchored component of membrane (GO:0031225);; Molecular Function: cation binding (GO:0043169);;	--	--	Glucan endo-1,3-beta-glucosidase 14 (Precursor) GN=At2g27500 OS=Arabidopsis thaliana (Mouse-ear cress) PE=1 SV=2	R	General function prediction only	PREDICTED: glucan endo-1,3-beta-glucosidase 14-like [Populus euphratica]
gene1049	LOC107418377	1.32125	28.5513	97.9833	0.752135	0.115824	0.255459	1.40599e-09	-6.84315329354224	down	[C]	Energy production and conversion	--	--	--	Cannabidiolic acid synthase-like 2 (Precursor) GN=CBDAS3 OS=Cannabis sativa (Hemp) PE=2 SV=1	R	General function prediction only	FAD-binding domain-containing family protein [Populus trichocarpa]
gene1450	LOC107422492	1.71852	25.119	60.1814	0.372698	0.121512	0.194123	7.32143e-13	-7.01891230243342	down	[E]	Amino acid transport and metabolism	--	K01581|0|tcc:TCM_034310|Pyridoxal-dependent decarboxylase family protein, putative; K01581 ornithine decarboxylase [EC:4.1.1.17] (A)	Arginine and proline metabolism (ko00330);; Glutathione metabolism (ko00480)	Ornithine decarboxylase GN=ODC OS=Solanum lycopersicum (Tomato) PE=2 SV=2	E	Amino acid transport and metabolism	ornithine decarboxylase [Erythroxylum coca]
gene13745	LOC107421655	0.824299	3.7131	14.744	0.153767	0	0	7.36595e-11	-7.02395756086736	down	[Q]	Secondary metabolites biosynthesis, transport and catabolism	Molecular Function: binding (GO:0005488);; Molecular Function: oxidoreductase activity (GO:0016491);;	--	--	Beta-amyrin 28-oxidase OS=Panax ginseng (Korean ginseng) PE=2 SV=1	Q	Secondary metabolites biosynthesis, transport and catabolism	cytochrome P450, putative [Ricinus communis]
gene15225	LOC107423298	0.844647	2.18844	10.9041	0.0196273	0.0400493	0.0377267	3.59073e-14	-7.17729673187546	down	[F]	Nucleotide transport and metabolism	Molecular Function: hydrolase activity (GO:0016787);;	--	--	--	F	Nucleotide transport and metabolism	hypothetical protein L484_011284 [Morus notabilis]
gene9220	LOC107416712	2.47762	7.88021	35.8881	0.0769478	0.154865	0.072877	1.21287e-15	-7.31049419383011	down	--	--	--	--	--	7-deoxyloganetin glucosyltransferase GN=UGT85A24 OS=Gardenia jasminoides (Cape jasmine) PE=1 SV=1	G	Carbohydrate transport and metabolism	PREDICTED: UDP-glycosyltransferase 85A5-like isoform X2 [Prunus mume]
gene28504	LOC107405004	3.16422	32.7296	94.2473	0.429503	0.0880968	0.166756	8.62285e-14	-7.63207258700609	down	--	--	--	--	--	Miraculin (Precursor) OS=Synsepalum dulcificum (Miracle fruit) PE=1 SV=3	R	General function prediction only	PREDICTED: alpha-amylase/subtilisin inhibitor-like [Prunus mume]
gene30984	LOC107407673	0.843797	23.7482	37.6333	0.192346	0	0.125017	7.42963e-12	-7.66687518485434	down	[E]	Amino acid transport and metabolism	Molecular Function: oxidoreductase activity, acting on CH-OH group of donors (GO:0016614);; Biological Process: single-organism metabolic process (GO:0044710);; Molecular Function: mandelonitrile lyase activity (GO:0046593);; Molecular Function: flavin adenine dinucleotide binding (GO:0050660);; Biological Process: nitrile metabolic process (GO:0050898);;	K08248|0|pmum:103323466|(R)-mandelonitrile lyase 3-like; K08248 mandelonitrile lyase [EC:4.1.2.10] (A)	Cyanoamino acid metabolism (ko00460)	(R)-mandelonitrile lyase 2 (Precursor) GN=MDL2 OS=Prunus dulcis (Almond) PE=1 SV=1	G	Carbohydrate transport and metabolism	PREDICTED: (R)-mandelonitrile lyase 3-like [Prunus mume]
gene23768	LOC107432508	0.96529	26.9421	39.4892	0.131337	0.171588	0.041012	4.52659e-13	-7.6874971522824	down	--	--	Cellular Component: Golgi apparatus (GO:0005794);; Cellular Component: cytosol (GO:0005829);; Cellular Component: plasma membrane (GO:0005886);; Cellular Component: plant-type cell wall (GO:0009505);; Cellular Component: plasmodesma (GO:0009506);; Cellular Component: apoplast (GO:0048046);;	--	--	Epidermis-specific secreted glycoprotein EP1 (Precursor) GN=EP1 OS=Daucus carota (Wild carrot) PE=1 SV=1	R	General function prediction only	PREDICTED: epidermis-specific secreted glycoprotein EP1-like [Vitis vinifera]
gene18111	LOC107426387	32.5954	46.788	224.049	0.871552	0.537726	0.301876	1.1024e-25	-7.71736886108711	down	[P]	Inorganic ion transport and metabolism	Molecular Function: secondary active sulfate transmembrane transporter activity (GO:0008271);; Biological Process: sulfate transport (GO:0008272);; Cellular Component: integral component of membrane (GO:0016021);; Biological Process: transmembrane transport (GO:0055085);;	K17471|0|mdm:103430184|sulfate transporter 3.1-like; K17471 sulfate transporter 3 (A)	--	Sulfate transporter 3.1 OS=Arabidopsis thaliana (Mouse-ear cress) PE=2 SV=1	P	Inorganic ion transport and metabolism	PREDICTED: sulfate transporter 3.1-like [Malus domestica]
gene10695	LOC107418319	0.691949	14.3121	54.3451	0.139875	0	0.233084	4.59456e-10	-7.76645873081858	down	[Q]	Secondary metabolites biosynthesis, transport and catabolism	Molecular Function: oxidoreductase activity (GO:0016491);; Molecular Function: metal ion binding (GO:0046872);;	--	--	Cytochrome P450 71A1 GN=CYP71A1 OS=Persea americana (Avocado) PE=1 SV=2	Q	Secondary metabolites biosynthesis, transport and catabolism	hypothetical protein POPTR_0016s14460g [Populus trichocarpa]
gene9221	LOC107416713	7.4319	19.1927	94.2075	0.158059	0.279116	0	7.95473e-18	-8.21418814867751	down	--	--	--	--	--	7-deoxyloganetin glucosyltransferase GN=UGT85A24 OS=Gardenia jasminoides (Cape jasmine) PE=1 SV=1	G	Carbohydrate transport and metabolism	PREDICTED: UDP-glycosyltransferase 85A5-like isoform X2 [Prunus mume]
gene27190	LOC107403559	1.30396	18.5569	58.8059	0.0956727	0	0.1749	8.85176e-13	-8.22777774117723	down	--	--	Molecular Function: catechol oxidase activity (GO:0004097);; Cellular Component: chloroplast thylakoid lumen (GO:0009543);; Biological Process: pigment biosynthetic process (GO:0046148);; Molecular Function: metal ion binding (GO:0046872);; Biological Process: oxidation-reduction process (GO:0055114);;	--	--	Polyphenol oxidase, chloroplastic (Precursor) OS=Malus domestica (Apple) PE=2 SV=1	S	Function unknown	polyphenol oxidase [Ziziphus jujuba]
gene16921	LOC107425104	0.972536	24.8959	55.423	0.102722	0.0266939	0.0761745	1.91567e-14	-8.66706201802972	down	--	--	Biological Process: carbohydrate metabolic process (GO:0005975);; Molecular Function: lyase activity (GO:0016829);; Molecular Function: carbohydrate binding (GO:0030246);;	K18195|0|pmum:103335338|probable rhamnogalacturonate lyase B; K18195 rhamnogalacturonan endolyase [EC:4.2.2.23] (A)	--	--	R	General function prediction only	PREDICTED: probable rhamnogalacturonate lyase B [Prunus mume]
gene23767	LOC107432479	2.4115	17.2727	19.0871	0	0.0659901	0	4.38136e-19	-8.87493482310346	down	--	--	--	--	--	Epidermis-specific secreted glycoprotein EP1 (Precursor) GN=EP1 OS=Daucus carota (Wild carrot) PE=1 SV=1	R	General function prediction only	PREDICTED: epidermis-specific secreted glycoprotein EP1-like [Malus domestica]
gene6362	LOC107413585	2.12041	5.28315	120.485	0	0	0.227698	1.37244e-09	-9.04928460299588	down	--	--	Cellular Component: endoplasmic reticulum (GO:0005783);; Biological Process: response to UV (GO:0009411);; Molecular Function: intramolecular lyase activity (GO:0016872);; Cellular Component: organelle membrane (GO:0031090);; Cellular Component: intracellular organelle part (GO:0044446);;	K01859|1.92e-98|fve:101292744|chalcone--flavonone isomerase 1-like; K01859 chalcone isomerase [EC:5.5.1.6] (A)	Flavonoid biosynthesis (ko00941)	Chalcone--flavonone isomerase 1 GN=CHI1 OS=Fragaria ananassa (Strawberry) PE=2 SV=1	G	Carbohydrate transport and metabolism	PREDICTED: chalcone--flavonone isomerase 1-like [Fragaria vesca subsp. vesca]
jujube_newGene_2911	--	7.90098	23.8022	2.1081	1.10622e-10	3.57911e-13	0.000348505	2.99569e-14	-9.87487292881523	down	--	--	Molecular Function: hydrolase activity, hydrolyzing O-glycosyl compounds (GO:0004553);; Cellular Component: cell wall (GO:0005618);; Biological Process: cellular glucan metabolic process (GO:0006073);; Molecular Function: xyloglucan:xyloglucosyl transferase activity (GO:0016762);; Cellular Component: apoplast (GO:0048046);;	--	--	Xyloglucan endotransglucosylase/hydrolase protein 22 (Precursor) GN=MUA2.13 OS=Arabidopsis thaliana (Mouse-ear cress) PE=1 SV=1	R	General function prediction only	xyloglucan endotransglucosylase/hydrolase [Ziziphus jujuba]
gene9211	LOC107416704	2.90652	9.60556	4.6063	0.0003066	0.000155335	0.00220915	2.40292e-25	-10.2912908658924	down	--	--	Molecular Function: transferase activity, transferring glycosyl groups (GO:0016757);;	--	--	Putative UDP-glucose flavonoid 3-O-glucosyltransferase 3 {ECO:0000250|UniProtKB:Q2V6K0} OS=Fragaria ananassa (Strawberry) PE=2 SV=1	CG	Energy production and conversion;; Carbohydrate transport and metabolism	PREDICTED: putative UDP-glucose flavonoid 3-O-glucosyltransferase 3 [Prunus mume]
gene7701	LOC107415012	2.1628	39.7773	110.913	0.0376817	0.000271816	0.116749	3.54808e-15	-10.7055952716188	down	--	--	Molecular Function: oxidoreductase activity, acting on single donors with incorporation of molecular oxygen, incorporation of two atoms of oxygen (GO:0016702);; Molecular Function: oxidoreductase activity, acting on paired donors, with incorporation or reduction of molecular oxygen, 2-oxoglutarate as one donor, and incorporation of one atom each of oxygen into both donors (GO:0016706);; Biologica…	K06892|3.10083e-76|pop:POPTR_0001s04410g|POPTRDRAFT_639660; oxidoreductase family protein; K06892 feruloyl-CoA ortho-hydroxylase [EC:1.14.11.-] (A)	--	Feruloyl CoA ortho-hydroxylase 1 GN=F6&apos;H1 OS=Arabidopsis thaliana (Mouse-ear cress) PE=1 SV=1	Q	Secondary metabolites biosynthesis, transport and catabolism	PREDICTED: feruloyl CoA ortho-hydroxylase 1-like [Populus euphratica]
gene5475	LOC107412595	2.61065	107.761	309.297	0	0	0.134404	6.11e-14	-11.27173158	down	--	--	--	--	--	--	--	--	--

## Sheet: CJ vs. NJ
#ID	gene_name	CJ1 FPKM	CJ2 FPKM	CJ3 FPKM	NJ1 FPKM	NJ2 FPKM	NJ3 FPKM	P-value	log2FC	regulated	COG_class	COG_class_annotation	GO_annotation	KEGG_annotation	KEGG_pathway_annotation	Swiss-Prot_annotation	eggNOG_class	eggNOG_class_annotation	NR_annotation
gene28904	LOC107405433	0.0990938	0.700958	0.166792	10.4651	0.256443	9.41127	2.11816e-05	4.38064	up	[L]	Replication, recombination and repair	Molecular Function: nucleic acid binding (GO:0003676);; Molecular Function: catalytic activity (GO:0003824);; Biological Process: DNA metabolic process (GO:0006259);;	--	--	RNA-directed DNA polymerase homolog OS=Oenothera berteroana (Bertero&apos;s evening primrose) PE=4 SV=1	L	Replication, recombination and repair	PREDICTED: uncharacterized protein LOC102625991 [Citrus sinensis]
gene30138	LOC107406762	24.4688	73.6054	24.2442	986.173	38.9493	1006.41	1.63642e-06	4.01824	up	[L]	Replication, recombination and repair	Molecular Function: nucleic acid binding (GO:0003676);; Molecular Function: catalytic activity (GO:0003824);; Biological Process: DNA metabolic process (GO:0006259);;	--	--	RNA-directed DNA polymerase homolog OS=Oenothera berteroana (Bertero&apos;s evening primrose) PE=4 SV=1	L	Replication, recombination and repair	hypothetical protein VITISV_001313 [Vitis vinifera]
jujube_newGene_297	--	0	1.58635	0.135171	3.0245	5.58923	11.6051	8.54408e-05	3.54465	up	--	--	--	--	--	--	L	Replication, recombination and repair	PREDICTED: putative nuclease HARBI1-like [Citrus sinensis]
gene30137	LOC107406761	0.161826	0.179166	0.160935	2.80446	0.144215	2.11109	1.90291e-05	3.35847	up	[L]	Replication, recombination and repair	Molecular Function: RNA binding (GO:0003723);; Molecular Function: RNA-directed DNA polymerase activity (GO:0003964);; Molecular Function: aspartic-type endopeptidase activity (GO:0004190);; Cellular Component: nucleus (GO:0005634);; Biological Process: RNA-dependent DNA replication (GO:0006278);; Biological Process: proteolysis (GO:0006508);; Molecular Function: zinc ion binding (GO:0008270);; B…	--	--	RNA-directed DNA polymerase homolog OS=Oenothera berteroana (Bertero&apos;s evening primrose) PE=4 SV=1	R	General function prediction only	hypothetical protein VITISV_032357 [Vitis vinifera]
jujube_newGene_1560	--	3.5316	17.0538	2.98361	114.163	7.65369	102.19	6.78834e-05	3.23671	up	--	--	Cellular Component: chloroplast (GO:0009507);; Molecular Function: hydrolase activity (GO:0016787);;	--	--	Protein TIC 214 {ECO:0000250|UniProtKB:P56785} OS=Vitis vinifera (Grape) PE=3 SV=1	S	Function unknown	Cell wall-associated hydrolase, partial [Medicago truncatula]
jujube_newGene_1603	--	2.32221	7.64921	2.43574	64.8494	3.80065	55.6883	2.48149e-05	3.22127	up	[CP]	Energy production and conversion;; Inorganic ion transport and metabolism	Molecular Function: NADH dehydrogenase (ubiquinone) activity (GO:0008137);; Cellular Component: chloroplast (GO:0009507);; Cellular Component: integral component of membrane (GO:0016021);; Biological Process: ATP synthesis coupled electron transport (GO:0042773);; Molecular Function: quinone binding (GO:0048038);;	K05577|0|pmum:18668087|ndhF, CP95_p018; NADH-plastoquinone oxidoreductase subunit 5; K05577 NAD(P)H-quinone oxidoreductase subunit 5 [EC:1.6.5.3] (A)	Oxidative phosphorylation (ko00190)	NAD(P)H-quinone oxidoreductase subunit 5, chloroplastic GN=ndhF OS=Eucalyptus globulus subsp. globulus (Tasmanian blue gum) PE=3 SV=1	C	Energy production and conversion	NADH-plastoquinone oxidoreductase subunit 5, partial (chloroplast) [Ceanothus prostratus]
jujube_newGene_2122	--	5.70266	23.856	3.55195	151.17	9.89701	145.473	0.000127013	3.15068	up	--	--	Cellular Component: chloroplast (GO:0009507);;	--	--	--	J	Translation, ribosomal structure and biogenesis	hypothetical protein M569_00222, partial [Genlisea aurea]
jujube_newGene_2633	--	13.2236	19.0569	12.284	145.199	11.9463	141.527	1.63764e-05	2.7064	up	--	--	Cellular Component: mitochondrion (GO:0005739);;	--	--	Uncharacterized mitochondrial protein AtMg00030 GN=AtMg00030 OS=Arabidopsis thaliana (Mouse-ear cress) PE=4 SV=1	S	Function unknown	Mitochondrial protein, putative [Medicago truncatula]
gene30031	LOC107406645	1.14221	2.72807	2.18633	18.6593	1.53036	10.6651	0.000480601	2.3304	up	[C]	Energy production and conversion	Molecular Function: ATP binding (GO:0005524);; Cellular Component: mitochondrial inner membrane (GO:0005743);; Biological Process: ATP synthesis coupled proton transport (GO:0015986);; Biological Process: ATP hydrolysis coupled proton transport (GO:0015991);; Cellular Component: proton-transporting ATP synthase complex, catalytic core F(1) (GO:0045261);; Molecular Function: proton-transporting AT…	K02132|0|rcu:RCOM_Mp35|atp1; ATP synthase F1 subunit 1; K02132 F-type H+-transporting ATPase subunit alpha (A)	Oxidative phosphorylation (ko00190)	ATP synthase subunit alpha, mitochondrial GN=ATPA OS=Helianthus annuus (Common sunflower) PE=3 SV=1	C	Energy production and conversion	ATP synthase subunit 1 (mitochondrion) [Batis maritima]
jujube_newGene_2777	--	0.126735	0.846323	0.224792	3.96142	0.0263913	1.38405	0.0470387	2.18625	up	[C]	Energy production and conversion	Cellular Component: chloroplast thylakoid membrane (GO:0009535);; Biological Process: photosynthetic electron transport chain (GO:0009767);; Cellular Component: integral component of membrane (GO:0016021);; Molecular Function: oxidoreductase activity (GO:0016491);; Biological Process: respiratory electron transport chain (GO:0022904);; Molecular Function: electron transporter, transferring electr…	K02637|1.85263e-106|pda:9405965|petD, PhdaC_p97; cytochrome b6-f complex subunit IV; K02637 cytochrome b6-f complex subunit 4 (A)	Photosynthesis (ko00195)	Cytochrome b6-f complex subunit 4 {ECO:0000255|HAMAP-Rule:MF_01344} OS=Populus alba (White poplar) PE=3 SV=1	C	Energy production and conversion	cytochrome b6/f complex subunit 4 [Eustrephus latifolius]
jujube_newGene_1351	--	0.0318831	0.278334	0.371838	0.897761	1.04563	0.706748	0.0013656	2.17893	up	--	--	--	--	--	--	--	--	--
gene17055	LOC107425263	0.213822	0.135426	0.153394	1.28641	0.149093	0.519257	0.00692564	1.95574	up	--	--	Cellular Component: mitochondrion (GO:0005739);;	--	--	Putative cytochrome c biogenesis ccmF-like mitochondrial protein GN=CCMFC OS=Arabidopsis thaliana (Mouse-ear cress) PE=1 SV=2	S	Function unknown	PREDICTED: putative cytochrome c biogenesis ccmF-like mitochondrial protein [Nicotiana sylvestris]
jujube_newGene_2223	--	0.820266	1.16846	0.637996	6.22716	0.946137	2.84747	0.00177365	1.92734	up	[J]	Translation, ribosomal structure and biogenesis	Molecular Function: structural constituent of ribosome (GO:0003735);; Cellular Component: mitochondrion (GO:0005739);; Cellular Component: ribosome (GO:0005840);; Biological Process: translation (GO:0006412);;	K02946|5.95263e-42|mtr:MTR_1g006120|Ribosomal protein S10; K02946 small subunit ribosomal protein S10 (A)	Ribosome (ko03010)	Ribosomal protein S10, mitochondrial GN=RPS10 OS=Pisum sativum (Garden pea) PE=2 SV=1	S	Function unknown	PREDICTED: LOW QUALITY PROTEIN: ribosomal protein S10, mitochondrial [Vitis vinifera]
gene8295	LOC107415680	0.875535	2.479	1.1935	6.23823	2.92646	6.03414	0.000536943	1.73291	up	--	--	--	--	--	--	R	General function prediction only	Binding protein, putative [Theobroma cacao]
gene19985	LOC107428481	29.4811	1.12468	8.65337	25.3572	52.9441	45.8849	0.0151768	1.70432	up	[O]	Posttranslational modification, protein turnover, chaperones	--	K13993|7.01964e-93|rcu:RCOM_1082490|heat shock protein, putative; K13993 HSP20 family protein (A)	Protein processing in endoplasmic reticulum (ko04141)	Small heat shock protein, chloroplastic (Fragment) GN=HSP22 OS=Glycine max (Soybean) PE=2 SV=1	O	Posttranslational modification, protein turnover, chaperones	hypothetical protein JCGZ_17893 [Jatropha curcas]
gene10104	LOC107417637	109.021	1.76781	55.3007	135.594	180.367	211.054	0.0331941	1.67456	up	--	--	Molecular Function: chaperone binding (GO:0051087);;	--	--	BAG family molecular chaperone regulator 5, mitochondrial (Precursor) GN=BAG5 OS=Arabidopsis thaliana (Mouse-ear cress) PE=1 SV=1	S	Function unknown	BAG family molecular chaperone regulator 5 [Morus notabilis]
gene9281	LOC107416782	1.00365	0.0401837	0.42057	1.64856	1.59466	0.936583	0.0356863	1.60673	up	--	--	--	--	--	7-deoxyloganetin glucosyltransferase GN=UGT85A24 OS=Gardenia jasminoides (Cape jasmine) PE=1 SV=1	G	Carbohydrate transport and metabolism	PREDICTED: UDP-glycosyltransferase 85A2-like [Prunus mume]
gene12331	LOC107420051	43.4795	8.97312	26.0608	68.3278	75.6315	92.6944	0.000259383	1.6039	up	[K]	Transcription	Molecular Function: DNA binding (GO:0003677);; Biological Process: regulation of transcription, DNA-templated (GO:0006355);; Biological Process: response to heat (GO:0009408);;	K09419|3.12879e-161|tcc:TCM_037308|Heat shock transcription factor A2 isoform 1; K09419 heat shock transcription factor, other eukaryote (A)	--	Heat shock factor protein HSF30 GN=HSF30 OS=Solanum peruvianum (Peruvian tomato) PE=2 SV=1	K	Transcription	Heat shock transcription factor A2 isoform 4 [Theobroma cacao]
gene28536	LOC107405040	35.0845	0.719199	53.952	74.7904	101.648	85.5839	0.0490425	1.56106	up	[O]	Posttranslational modification, protein turnover, chaperones	--	--	--	Chaperone protein dnaJ 20, chloroplastic (Precursor) GN=F18A5.220 OS=Arabidopsis thaliana (Mouse-ear cress) PE=1 SV=2	O	Posttranslational modification, protein turnover, chaperones	Chaperone DnaJ-domain superfamily protein [Theobroma cacao]
gene6713	LOC107413963	0.246111	0.331618	1.0261	2.65567	0.806732	0.950894	0.0279694	1.54611	up	--	--	--	K00430|8.22496e-148|pmum:103332863|peroxidase 4-like; K00430 peroxidase [EC:1.11.1.7] (A)	Phenylalanine metabolism (ko00360);; Phenylpropanoid biosynthesis (ko00940)	Peroxidase 4 {ECO:0000250|UniProtKB:Q42578} (Precursor) OS=Vitis vinifera (Grape) PE=1 SV=1	G	Carbohydrate transport and metabolism	PREDICTED: peroxidase 4-like [Prunus mume]
gene12949	LOC107420811	74.7217	1.76072	48.6624	85.9903	126.282	137.773	0.0381136	1.51505	up	--	--	--	K13120|1.67399e-32|pop:POPTR_0005s15980g|POPTRDRAFT_863345; hypothetical protein; K13120 protein FAM32A (A)	--	--	S	Function unknown	hypothetical protein POPTR_0005s15980g [Populus trichocarpa]
gene18291	LOC107426507	0.847954	0.0254134	0.312054	0.963183	0.782799	0.952271	0.0421169	1.50528	up	[O]	Posttranslational modification, protein turnover, chaperones	Molecular Function: nucleotide binding (GO:0000166);; Cellular Component: endoplasmic reticulum lumen (GO:0005788);; Biological Process: protein folding (GO:0006457);; Biological Process: response to heat (GO:0009408);; Cellular Component: chloroplast (GO:0009507);; Biological Process: response to high light intensity (GO:0009644);; Biological Process: pollen tube growth (GO:0009860);; Biological…	K09490|4.37073e-154|pmum:103344590|luminal-binding protein 5; K09490 heat shock 70kDa protein 5 (A)	Protein export (ko03060);; Protein processing in endoplasmic reticulum (ko04141)	Probable mediator of RNA polymerase II transcription subunit 37b (Precursor) GN=At1g09080 OS=Arabidopsis thaliana (Mouse-ear cress) PE=1 SV=1	O	Posttranslational modification, protein turnover, chaperones	PREDICTED: luminal-binding protein 5 [Prunus mume]
gene7295	LOC107414580	1.30023	1.87353	0.478171	2.83984	4.8149	2.30422	0.0131885	1.49345	up	--	--	Cellular Component: integral component of plasma membrane (GO:0005887);; Biological Process: carbohydrate transport (GO:0008643);; Molecular Function: sugar transmembrane transporter activity (GO:0051119);;	K15382|9.68867e-117|vvi:100246651|bidirectional sugar transporter SWEET3; K15382 solute carrier family 50 (sugar transporter) (A)	--	Bidirectional sugar transporter SWEET3 GN=SWEET3 OS=Arabidopsis thaliana (Mouse-ear cress) PE=2 SV=1	P	Inorganic ion transport and metabolism	PREDICTED: bidirectional sugar transporter SWEET3 [Populus euphratica]
gene9464	LOC107416999	331.335	57.4823	223.133	518.685	624.675	516.52	0.00105532	1.47325	up	--	--	Cellular Component: plasma membrane (GO:0005886);; Cellular Component: photosystem I (GO:0009522);; Cellular Component: photosystem II (GO:0009523);; Cellular Component: chloroplast thylakoid membrane (GO:0009535);; Biological Process: response to blue light (GO:0009637);; Biological Process: photosynthesis, light harvesting (GO:0009765);; Cellular Component: chloroplast envelope (GO:0009941);; B…	K08913|0|rcu:RCOM_0483250|chlorophyll A/B binding protein, putative; K08913 light-harvesting complex II chlorophyll a/b binding protein 2 (A)	Photosynthesis - antenna proteins (ko00196)	Chlorophyll a-b binding protein 151, chloroplastic (Precursor) GN=CAB-151 OS=Gossypium hirsutum (Upland cotton) PE=2 SV=2	O	Posttranslational modification, protein turnover, chaperones	chlorophyll A/B binding protein [Ziziphus jujuba]
gene27535	LOC107403934	75.3503	10.5603	51.6179	106.734	121.165	120.643	0.00469983	1.37923	up	[O]	Posttranslational modification, protein turnover, chaperones	Molecular Function: ATP binding (GO:0005524);; Cellular Component: cell wall (GO:0005618);; Cellular Component: nucleolus (GO:0005730);; Cellular Component: plasma membrane (GO:0005886);; Biological Process: protein folding (GO:0006457);; Biological Process: response to heat (GO:0009408);; Biological Process: response to salt stress (GO:0009651);; Molecular Function: heat shock protein binding (G…	K09503|4.15626e-55|cic:CICLE_v10015385mg|hypothetical protein; K09503 DnaJ homolog subfamily A member 2 (A)	Protein processing in endoplasmic reticulum (ko04141)	DnaJ protein homolog (Precursor) GN=DNAJ1 OS=Cucumis sativus (Cucumber) PE=2 SV=1	O	Posttranslational modification, protein turnover, chaperones	hypothetical protein CICLE_v10015385mg [Citrus clementina]
gene27208	LOC107403577	102.514	20.5439	72.5523	145.166	174.234	172.712	0.00176782	1.33838	up	[O]	Posttranslational modification, protein turnover, chaperones	Molecular Function: ATP binding (GO:0005524);; Cellular Component: cell wall (GO:0005618);; Cellular Component: nucleolus (GO:0005730);; Cellular Component: plasma membrane (GO:0005886);; Biological Process: protein folding (GO:0006457);; Biological Process: response to heat (GO:0009408);; Biological Process: response to salt stress (GO:0009651);; Molecular Function: heat shock protein binding (G…	K09503|0|pop:POPTR_0009s02100g|POPTRDRAFT_558228; seed maturation protein PM37; K09503 DnaJ homolog subfamily A member 2 (A)	Protein processing in endoplasmic reticulum (ko04141)	DnaJ protein homolog (Precursor) GN=DNAJ1 OS=Cucumis sativus (Cucumber) PE=2 SV=1	O	Posttranslational modification, protein turnover, chaperones	PREDICTED: dnaJ protein homolog isoform X2 [Vitis vinifera]
gene21699	LOC107430289	1.44322	2.08431	1.20929	2.93851	4.2094	4.28325	0.00676777	1.27758	up	--	--	Molecular Function: aspartic-type endopeptidase activity (GO:0004190);; Biological Process: proteolysis (GO:0006508);;	--	--	Aspartic proteinase nepenthesin-2 (Precursor) GN=nep2 OS=Nepenthes gracilis (Slender pitcher plant) PE=1 SV=1	O	Posttranslational modification, protein turnover, chaperones	pepsin A, putative [Ricinus communis]
gene30147	LOC107406772	1.97687	2.55016	0.566577	2.95694	4.1606	5.4397	0.0297474	1.27241	up	[S]	Function unknown	--	--	--	Vacuolar iron transporter homolog 4 GN=At3g43660 OS=Arabidopsis thaliana (Mouse-ear cress) PE=2 SV=1	S	Function unknown	hypothetical protein PHAVU_007G079100g [Phaseolus vulgaris]
jujube_newGene_1937	--	0.384411	0.106024	0.184709	0.321863	0.484085	0.799274	0.0427287	1.2632	up	--	--	Cellular Component: nucleus (GO:0005634);; Biological Process: chromatin organization (GO:0006325);; Biological Process: anatomical structure morphogenesis (GO:0009653);; Biological Process: embryo development ending in seed dormancy (GO:0009793);; Biological Process: floral organ abscission (GO:0010227);;	K16615|5.85507e-18|pper:PRUPE_ppa007632mg|hypothetical protein; K16615 actin-related protein 7, plant (A)	--	Actin-related protein 7 GN=ARP7 OS=Arabidopsis thaliana (Mouse-ear cress) PE=1 SV=1	Z	Cytoskeleton	unnamed protein product [Coffea canephora]
gene20356	LOC107428837	1.24156	0.3372	0.946106	2.17754	1.96071	1.7226	0.0233689	1.24373	up	--	--	Molecular Function: protein kinase activity (GO:0004672);; Molecular Function: ATP binding (GO:0005524);; Biological Process: protein phosphorylation (GO:0006468);;	--	--	Probable LRR receptor-like serine/threonine-protein kinase At1g14390 (Precursor) GN=At1g14390 OS=Arabidopsis thaliana (Mouse-ear cress) PE=2 SV=1	T	Signal transduction mechanisms	PREDICTED: probable LRR receptor-like serine/threonine-protein kinase At1g14390 [Prunus mume]
gene21597	LOC107430166	81.7292	4.48613	42.3567	79.029	114.522	107.622	0.0472887	1.23648	up	[O]	Posttranslational modification, protein turnover, chaperones	Molecular Function: ATP binding (GO:0005524);; Cellular Component: cell wall (GO:0005618);; Cellular Component: cytosol (GO:0005829);; Cellular Component: plasma membrane (GO:0005886);; Biological Process: protein folding (GO:0006457);; Biological Process: response to heat (GO:0009408);; Biological Process: defense response to bacterium (GO:0042742);; Biological Process: response to arsenic-conta…	K04079|0|mdm:103443172|heat shock protein 83-like; K04079 molecular chaperone HtpG (A)	Protein processing in endoplasmic reticulum (ko04141);; Plant-pathogen interaction (ko04626)	Heat shock protein 83 GN=HSP83A OS=Ipomoea nil (Japanese morning glory) PE=2 SV=1	O	Posttranslational modification, protein turnover, chaperones	Heat shock protein 83 [Morus notabilis]
gene15485	LOC107423584	146.708	46.046	132.88	235.267	263.802	235.941	0.00146246	1.18658	up	--	--	Molecular Function: DNA binding (GO:0003677);; Biological Process: rRNA processing (GO:0006364);; Biological Process: unsaturated fatty acid biosynthetic process (GO:0006636);; Biological Process: response to light stimulus (GO:0009416);; Cellular Component: chloroplast thylakoid membrane (GO:0009535);; Cellular Component: chloroplast inner membrane (GO:0009706);; Biological Process: thylakoid me…	K04035|0|rcu:RCOM_1272340|Magnesium-protoporphyrin IX monomethyl ester [oxidative] cyclase, chloroplast precursor, putative (EC:1.14.13.81); K04035 magnesium-protoporphyrin IX monomethyl ester (oxidative) cyclase [EC:1.14.13.81] (A)	Porphyrin and chlorophyll metabolism (ko00860)	Magnesium-protoporphyrin IX monomethyl ester [oxidative] cyclase, chloroplastic (Precursor) GN=CRD1 OS=Gossypium hirsutum (Upland cotton) PE=2 SV=2	H	Coenzyme transport and metabolism	Magnesium-protoporphyrin IX monomethyl ester [oxidative] cyclase [Morus notabilis]
jujube_newGene_1205	--	0.511271	0.648901	0.906545	1.61515	1.63999	1.42813	0.0340437	1.18075	up	--	--	--	--	--	Putative disease resistance protein RGA3 GN=RGA3 OS=Solanum bulbocastanum (Wild potato) PE=2 SV=2	T	Signal transduction mechanisms	PREDICTED: disease resistance protein RGA2-like [Pyrus x bretschneideri]
gene23128	LOC107431864	171.553	101.428	72.4391	174.471	290.9	309.747	0.000801778	1.17841	up	[K]	Transcription	--	K03627|3.12769e-82|vvi:100249249|multiprotein-bridging factor 1c; K03627 putative transcription factor (A)	--	Multiprotein-bridging factor 1c GN=MBF1C OS=Arabidopsis thaliana (Mouse-ear cress) PE=1 SV=1	K	Transcription	PREDICTED: multiprotein-bridging factor 1c [Vitis vinifera]
gene4629	LOC107411694	7.37709	2.79216	5.88205	10.1477	12.1915	12.6318	0.0076546	1.16419	up	--	--	Molecular Function: NADH dehydrogenase (ubiquinone) activity (GO:0008137);; Molecular Function: nucleobase:cation symporter activity (GO:0015391);; Biological Process: nucleobase-containing compound transport (GO:0015931);; Biological Process: ATP synthesis coupled electron transport (GO:0042773);;	--	--	Pentatricopeptide repeat-containing protein At4g38150 GN=At4g38150 OS=Arabidopsis thaliana (Mouse-ear cress) PE=2 SV=1	O	Posttranslational modification, protein turnover, chaperones	PREDICTED: pentatricopeptide repeat-containing protein At4g38150-like [Malus domestica]
gene13484	LOC107421373	2.54402	2.8654	1.57373	4.78836	4.88763	6.29658	0.0145615	1.15773	up	--	--	--	--	--	Anthocyanin 5-aromatic acyltransferase OS=Gentiana triflora (Clustered gentian) PE=1 SV=1	R	General function prediction only	PREDICTED: phenolic glucoside malonyltransferase 1-like [Malus domestica]
gene28075	LOC107404529	2.84085	1.40925	1.76979	4.64387	3.47667	5.58595	0.0149953	1.15706	up	[L]	Replication, recombination and repair	Biological Process: DNA repair (GO:0006281);; Molecular Function: hydrolase activity, acting on glycosyl bonds (GO:0016798);;	K01246|5.27443e-106|fve:101296948|probable GMP synthase [glutamine-hydrolyzing]-like; K01246 DNA-3-methyladenine glycosylase I [EC:3.2.2.20] (A)	Base excision repair (ko03410)	--	R	General function prediction only	PREDICTED: probable GMP synthase [glutamine-hydrolyzing]-like [Fragaria vesca subsp. vesca]
gene17148	LOC107425344	6.97749	1.08179	6.14635	9.91745	10.8667	9.8974	0.0288413	1.09815	up	--	--	Cellular Component: mitochondrion (GO:0005739);;	--	--	--	S	Function unknown	PREDICTED: uncharacterized protein LOC103325482 [Prunus mume]
gene8738	LOC107416180	26.4359	5.4375	15.3203	27.4184	34.5206	36.4312	0.013427	1.07406	up	--	--	Cellular Component: cytosol (GO:0005829);; Biological Process: protein folding (GO:0006457);; Biological Process: response to heat (GO:0009408);; Biological Process: response to high light intensity (GO:0009644);; Biological Process: response to endoplasmic reticulum stress (GO:0034976);; Biological Process: response to hydrogen peroxide (GO:0042542);;	--	--	--	S	Function unknown	PREDICTED: protein OPI10 homolog [Nicotiana sylvestris]
gene2133	LOC107430393	102.018	11.8367	81.9022	127.515	151.037	123.047	0.0380996	1.06384	up	--	--	Cellular Component: chloroplast (GO:0009507);; Biological Process: photosynthesis, light harvesting (GO:0009765);; Cellular Component: membrane (GO:0016020);; Molecular Function: metal ion binding (GO:0046872);;	K08914|0|vvi:100260599|chlorophyll a-b binding protein 13, chloroplastic; K08914 light-harvesting complex II chlorophyll a/b binding protein 3 (A)	Photosynthesis - antenna proteins (ko00196)	Chlorophyll a-b binding protein 13, chloroplastic (Precursor) GN=CAB13 OS=Solanum lycopersicum (Tomato) PE=1 SV=1	R	General function prediction only	PREDICTED: chlorophyll a-b binding protein 13, chloroplastic [Vitis vinifera]
gene20514	LOC107429014	258.67	31.0992	210.87	290.564	351.515	378.563	0.0369739	1.04793	up	--	--	Molecular Function: metal ion binding (GO:0046872);;	--	--	E3 ubiquitin-protein ligase RING1 GN=RING1 OS=Gossypium hirsutum (Upland cotton) PE=1 SV=1	O	Posttranslational modification, protein turnover, chaperones	E3 ubiquitin-protein ligase RING1 [Morus notabilis]
gene14493	LOC107422484	15.9404	10.8651	13.3543	26.364	26.9365	28.7661	0.000891955	1.04653	up	--	--	--	--	--	Vinorine synthase GN=ACT OS=Rauvolfia serpentina (Serpentine wood) PE=1 SV=2	S	Function unknown	PREDICTED: BAHD acyltransferase At5g47980-like isoform X2 [Pyrus x bretschneideri]
gene2983	LOC107406660	20.3676	18.2197	20.2524	36.3241	50.1118	34.9814	0.000200689	1.0367	up	--	--	--	K10781|7.63588e-83|pxb:103962990|palmitoyl-acyl carrier protein thioesterase, chloroplastic-like; K10781 fatty acyl-ACP thioesterase B [EC:3.1.2.14 3.1.2.21] (A)	Fatty acid biosynthesis (ko00061);; Fatty acid metabolism (ko01212)	Palmitoyl-acyl carrier protein thioesterase, chloroplastic (Precursor) GN=T27G7.19 OS=Arabidopsis thaliana (Mouse-ear cress) PE=1 SV=1	I	Lipid transport and metabolism	PREDICTED: palmitoyl-acyl carrier protein thioesterase, chloroplastic-like [Pyrus x bretschneideri]
gene1805	LOC107426779	25.675	5.91868	21.2564	36.2483	34.7039	35.906	0.0128415	1.01623	up	[C]	Energy production and conversion	Cellular Component: cytoplasm (GO:0005737);; Molecular Function: glyceraldehyde-3-phosphate dehydrogenase (NADP+) (non-phosphorylating) activity (GO:0008886);; Biological Process: oxidation-reduction process (GO:0055114);;	K00131|0|tcc:TCM_037078|Aldehyde dehydrogenase 11A3 isoform 1; K00131 glyceraldehyde-3-phosphate dehydrogenase (NADP+) [EC:1.2.1.9] (A)	Glycolysis / Gluconeogenesis (ko00010);; Pentose phosphate pathway (ko00030);; Carbon metabolism (ko01200)	NADP-dependent glyceraldehyde-3-phosphate dehydrogenase GN=GAPN OS=Nicotiana plumbaginifolia (Leadwort-leaved tobacco) PE=2 SV=1	C	Energy production and conversion	NADP-dependent glyceraldehyde-3-phosphate dehydrogenase [Morus notabilis]
gene7033	LOC107414306	28.0365	9.56188	13.9507	28.8044	35.9941	37.3921	0.00880299	1.00335	up	[O]	Posttranslational modification, protein turnover, chaperones	--	K13993|4.62598e-80|tcc:TCM_014924|Mitochondrion-localized small heat shock protein 23.6, putative isoform 1; K13993 HSP20 family protein (A)	Protein processing in endoplasmic reticulum (ko04141)	23.6 kDa heat shock protein, mitochondrial (Precursor) GN=HSP23.6 OS=Arabidopsis thaliana (Mouse-ear cress) PE=2 SV=1	O	Posttranslational modification, protein turnover, chaperones	hypothetical protein L484_001270 [Morus notabilis]
gene31660	LOC107408404	12.6623	59.0478	12.4739	13.4378	13.4588	15.7713	0.0457872	-1.00234004147021	down	[R]	General function prediction only	--	--	--	C2 domain-containing protein At1g53590 OS=Arabidopsis thaliana (Mouse-ear cress) PE=1 SV=2	R	General function prediction only	C2 domain-containing protein [Morus notabilis]
gene20504	LOC107428989	6.15687	2.98919	4.98236	2.28892	1.88975	2.74854	0.0159201	-1.00309718719092	down	--	--	--	--	--	--	S	Function unknown	PREDICTED: uncharacterized protein LOC101305364 [Fragaria vesca subsp. vesca]
gene1241	LOC107419518	14.5931	11.6748	8.98839	9.75751	4.21577	3.58903	0.0157326	-1.00420625271829	down	[V]	Defense mechanisms	Biological Process: drug transmembrane transport (GO:0006855);; Molecular Function: drug transmembrane transporter activity (GO:0015238);; Molecular Function: antiporter activity (GO:0015297);; Cellular Component: membrane (GO:0016020);;	K03327|0|vvi:100262309|protein TRANSPARENT TESTA 12; K03327 multidrug resistance protein, MATE family (A)	--	Protein TRANSPARENT TESTA 12 GN=F17J16_80 OS=Arabidopsis thaliana (Mouse-ear cress) PE=2 SV=1	S	Function unknown	Protein TRANSPARENT TESTA 12 -like protein [Gossypium arboreum]
gene24101	LOC107432924	6.69029	18.8606	6.28991	5.37264	5.71065	5.16066	0.0318443	-1.00429905059741	down	--	--	Molecular Function: AMP-activated protein kinase activity (GO:0004679);; Biological Process: response to sucrose (GO:0009744);; Biological Process: response to fructose (GO:0009750);;	K07199|3.43542e-139|vvi:100266800|SNF1-related protein kinase regulatory subunit beta-1; K07199 5'-AMP-activated protein kinase, regulatory beta subunit (A)	--	SNF1-related protein kinase regulatory subunit beta-1 GN=KINB1 OS=Arabidopsis thaliana (Mouse-ear cress) PE=1 SV=1	G	Carbohydrate transport and metabolism	SNF1-related protein kinase regulatory subunit beta-1 [Morus notabilis]
gene7837	LOC107415179	6.70023	25.5611	11.0441	6.63295	7.77355	7.98094	0.0379254	-1.00989798887458	down	[LR]	Replication, recombination and repair;; General function prediction only	Molecular Function: hydrolase activity (GO:0016787);;	K07766|3.66153e-99|pxb:103950382|nudix hydrolase 12, mitochondrial-like; K07766 diphosphoinositol-polyphosphate diphosphatase [EC:3.6.1.52] (A)	--	Nudix hydrolase 13, mitochondrial (Precursor) GN=MLJ15.8 OS=Arabidopsis thaliana (Mouse-ear cress) PE=1 SV=1	L	Replication, recombination and repair	PREDICTED: nudix hydrolase 12, mitochondrial-like [Pyrus x bretschneideri]
gene17805	LOC107426044	7.63986	5.69128	10.5655	4.92684	3.90445	2.9419	0.032548	-1.00995928677054	down	--	--	--	--	--	--	S	Function unknown	PREDICTED: putative uncharacterized protein YGR160W [Prunus mume]
gene860	LOC107416428	41.2749	40.778	28.6532	22.4848	14.7477	19.1081	0.000727191	-1.01175268652733	down	--	--	Biological Process: carbohydrate metabolic process (GO:0005975);; Molecular Function: glucan endo-1,3-beta-D-glucosidase activity (GO:0042973);;	--	--	Glucan endo-1,3-beta-glucosidase 5 (Precursor) GN=At4g31140 OS=Arabidopsis thaliana (Mouse-ear cress) PE=1 SV=1	R	General function prediction only	PREDICTED: glucan endo-1,3-beta-glucosidase 5 [Prunus mume]
gene7685	LOC107415078	5.01768	27.5532	8.25512	5.54957	6.41993	7.1232	0.0447441	-1.01342079155947	down	[KAD]	Transcription;; RNA processing and modification;; Cell cycle control, cell division, chromosome partitioning	Molecular Function: DNA binding (GO:0003677);; Molecular Function: chromatin binding (GO:0003682);;	K09422|2.45868e-85|cic:CICLE_v10015648mg|hypothetical protein; K09422 myb proto-oncogene protein, plant (A)	--	Transcription repressor MYB5 GN=MYB5 OS=Arabidopsis thaliana (Mouse-ear cress) PE=1 SV=1	K	Transcription	hypothetical protein JCGZ_01881 [Jatropha curcas]
gene2727	LOC107403849	0.975703	2.31792	1.11084	0.852696	0.597799	0.733048	0.0421644	-1.01810089215551	down	--	--	--	--	--	Anoctamin-like protein At1g73020 GN=At1g73020 OS=Arabidopsis thaliana (Mouse-ear cress) PE=1 SV=1	D	Cell cycle control, cell division, chromosome partitioning	hypothetical protein L484_008125 [Morus notabilis]
gene19991	LOC107428462	22.605	33.2198	21.226	14.4353	12.3315	11.7215	0.00107493	-1.01979861624903	down	--	--	--	--	--	--	O	Posttranslational modification, protein turnover, chaperones	hypothetical protein L484_027617 [Morus notabilis]
gene12805	LOC107420622	11.0941	24.0497	14.0039	9.92995	7.00379	7.94682	0.00335879	-1.02102055368807	down	--	--	Biological Process: single-multicellular organism process (GO:0044707);; Biological Process: single-organism cellular process (GO:0044763);; Biological Process: anatomical structure development (GO:0048856);; Biological Process: regulation of cellular process (GO:0050794);;	K12125|0|pmum:103320523|protein EARLY FLOWERING 3; K12125 protein EARLY FLOWERING 3 (A)	Circadian rhythm - plant (ko04712)	Protein EARLY FLOWERING 3 OS=Arabidopsis thaliana (Mouse-ear cress) PE=1 SV=1	S	Function unknown	PREDICTED: protein EARLY FLOWERING 3 [Prunus mume]
[truncated: 399 more rows]

## Sheet: NJ vs. NM
#ID	gene_name	NM1 FPKM	NM2 FPKM	NM3 FPKM	NJ1 FPKM	NJ2 FPKM	NJ3 FPKM	Pvalue	log2FC	regulated	COG_class	COG_class_annotation	GO_annotation	KEGG_annotation	KEGG_pathway_annotation	Swiss-Prot_annotation	eggNOG_class	eggNOG_class_annotation	NR_annotation
[truncated: 1,684 more rows]
