# Supplementary material for: Comparative Transcriptomic Analyses of Different Jujube Cultivars Reveal the Co-Regulation of Multiple Pathways during Fruit Cracking
Source: Genes (Basel). 2022 Jan 2;13(1):105. doi: 10.3390/genes13010105 (PMC8775106; doi:10.3390/genes13010105)
Supplement: Supplementary file 1 [file genes-13-00105-s001.zip › Table S5.xls]

## Sheet: Sheet1
Table S5 Annotation summaries of DEGs
DEG set	Annotated DEGs	COG	GO	KEGG	Nr	Swiss-Prot	eggNOG
CC vs. NC	710	313	434	246	709	599	704
CJ vs. NJ	444	172	246	165	443	352	440
NJ vs. NM	1621	638	930	505	1620	1225	1598
