# Supplementary material for: Comparative Transcriptomic Analyses of Different Jujube Cultivars Reveal the Co-Regulation of Multiple Pathways during Fruit Cracking
Source: Genes (Basel). 2022 Jan 2;13(1):105. doi: 10.3390/genes13010105 (PMC8775106; doi:10.3390/genes13010105)
Supplement: Supplementary file 1 [file genes-13-00105-s001.zip › Table S6.xls]

## Sheet: CC vs. NC
KEGG Pathway	ko_ID	DEG Number	Gene Number	P-value	Corrected_P-value	Gene IDs
2-Oxocarboxylic acid metabolism	ko01210	1	73	0.878254	1	gene343	K01703
ABC transporters	ko02010	2	31	0.217773	1	gene13994;gene17928	K05658+K05658
Alanine, aspartate and glutamate metabolism	ko00250	4	61	0.0927481	1	gene23890;gene6862;gene8063;gene8329	K00261+K00261+K00278+K01580
alpha-Linolenic acid metabolism	ko00592	5	58	0.0231984	1	gene12481;gene13568;gene15764;gene15917;gene5490	K01723+K05894+K05894+K05894+K00454
Amino sugar and nucleotide sugar metabolism	ko00520	11	165	0.00666837	0.53347	gene11412;gene14375;gene16151;gene1830;gene1837;gene1864;gene24030;gene2930;gene2935;gene32506;gene7234	K01183+K08679+K01183+K01183+K01183+K01183+K00844+K01183+K01183+K00975+K01183
Aminoacyl-tRNA biosynthesis	ko00970	1	69	0.863261	1	gene18276	K01874
Anthocyanin biosynthesis	ko00942	1	2	0.0557002	1	gene7527	K12930
Arachidonic acid metabolism	ko00590	1	19	0.420346	1	gene17197	K18592
Arginine and proline metabolism	ko00330	3	98	0.527209	1	gene1450;gene23890;gene6862	K01581+K00261+K00261
Ascorbate and aldarate metabolism	ko00053	2	55	0.463431	1	gene16460;gene4225	K00469+K00434
beta-Alanine metabolism	ko00410	4	61	0.0927481	1	gene1181;gene18223;gene8329;gene8681	K01578+K01918+K01580+K05605
Biosynthesis of amino acids	ko01230	8	289	0.576164	1	gene16161;gene18650;gene23295;gene24195;gene30355;gene3305;gene343;gene775	K00831+K00058+K01754+K00058+K00058+K05359+K01703+K00640
Biosynthesis of unsaturated fatty acids	ko01040	1	43	0.709724	1	gene27768	K10257
Brassinosteroid biosynthesis	ko00905	1	33	0.612632	1	jujube_newGene_1945	K15639
Butanoate metabolism	ko00650	4	31	0.0106365	0.850919	gene25889;gene28729;gene33132;gene8329	K01641+K01641+K01641+K01580
C5-Branched dibasic acid metabolism	ko00660	1	12	0.291206	1	gene343	K01703
Carbon fixation in photosynthetic organisms	ko00710	1	73	0.878254	1	gene12559	K00029
Carbon metabolism	ko01200	9	278	0.385881	1	gene12559;gene16161;gene18650;gene23295;gene24030;gene24195;gene30355;gene775;gene8681	K00029+K00831+K00058+K01754+K00844+K00058+K00058+K00640+K05605
Carotenoid biosynthesis	ko00906	4	47	0.0426829	1	gene1854;gene30271;gene3386;gene3393	K09840+K09840+K09842+K09842
Circadian rhythm - plant	ko04712	2	57	0.482122	1	gene14583;gene19560	K00660+K00660
Citrate cycle (TCA cycle)	ko00020	2	57	0.482122	1	gene11283;gene20204	K01648+K01648
Cutin, suberine and wax biosynthesis	ko00073	1	32	0.601303	1	gene17630	K13407
Cyanoamino acid metabolism	ko00460	4	107	0.357818	1	gene17197;gene30984;gene5500;gene694	K18592+K08248+K01188+K08248
Cysteine and methionine metabolism	ko00270	4	102	0.325439	1	gene11205;gene21608;gene24110;gene775	K00016+K01762+K01762+K00640
Degradation of aromatic compounds	ko01220	2	12	0.0434561	1	gene29690;gene4518	K00487+K00487
Diterpenoid biosynthesis	ko00904	1	39	0.67419	1	jujube_newGene_2732	K04125
Fatty acid biosynthesis	ko00061	1	64	0.841917	1	gene26332	K10781
Fatty acid elongation	ko00062	1	47	0.741405	1	gene15746	K15397
Fatty acid metabolism	ko01212	2	95	0.755408	1	gene26332;gene27768	K10781+K10257
Flavone and flavonol biosynthesis	ko00944	1	3	0.0823832	1	gene11393	K05280
Flavonoid biosynthesis	ko00941	10	50	9.39112e-07	7.5129e-05	gene11393;gene12383;gene12386;gene14583;gene19560;gene20705;gene29690;gene4518;gene6362;gene6363	K05280+K13082+K13082+K00660+K00660+K05277+K00487+K00487+K01859+K01859
Fructose and mannose metabolism	ko00051	1	76	0.888416	1	gene24030	K00844
Galactose metabolism	ko00052	6	88	0.0374056	1	gene14025;gene17029;gene21704;gene24030;gene7040;gene8088	K07407+K01193+K01193+K00844+K01193+K06617
Glutathione metabolism	ko00480	8	120	0.0196646	1	gene11068;gene1450;gene14833;gene17197;gene20310;gene33079;gene4225;gene8735	K00799+K01581+K00799+K18592+K00799+K00799+K00434+K00799
Glycerolipid metabolism	ko00561	2	65	0.552743	1	gene14025;gene17834	K07407+K13508
Glycerophospholipid metabolism	ko00564	1	99	0.942894	1	gene17834	K13508
Glycine, serine and threonine metabolism	ko00260	5	81	0.0780072	1	gene16161;gene18650;gene23295;gene24195;gene30355	K00831+K00058+K01754+K00058+K00058
Glycolysis / Gluconeogenesis	ko00010	2	143	0.917111	1	gene11205;gene24030	K00016+K00844
Glycosphingolipid biosynthesis - globo series	ko00603	1	16	0.368142	1	gene14025	K07407
Glyoxylate and dicarboxylate metabolism	ko00630	1	70	0.867173	1	gene28875	K01433
Inositol phosphate metabolism	ko00562	1	77	0.891612	1	gene16460	K00469
Isoflavonoid biosynthesis	ko00943	1	6	0.15802	1	gene29180	K13260
Linoleic acid metabolism	ko00591	2	18	0.0903037	1	gene4863;gene5490	K15718+K00454
Monoterpenoid biosynthesis	ko00902	1	18	0.403439	1	gene1348	K15086
Nicotinate and nicotinamide metabolism	ko00760	1	19	0.420346	1	gene8063	K00278
Nitrogen metabolism	ko00910	2	42	0.333612	1	gene23890;gene6862	K00261+K00261
One carbon pool by folate	ko00670	1	22	0.468262	1	gene28875	K01433
Other glycan degradation	ko00511	1	22	0.468262	1	gene13530	K17108
Other types of O-glycan biosynthesis	ko00514	1	8	0.204969	1	gene2347	K18134
Oxidative phosphorylation	ko00190	1	125	0.973314	1	jujube_newGene_1603	K05577
Pantothenate and CoA biosynthesis	ko00770	2	36	0.270498	1	gene18223;gene24075	K01918+K00606
Pentose and glucuronate interconversions	ko00040	5	118	0.240257	1	gene15728;gene2511;gene28523;gene30106;gene32846	K01051+K01051+K01051+K01051+K01051
Peroxisome	ko04146	2	98	0.770587	1	gene1181;gene32253	K01578+K12261
Phagosome	ko04145	2	92	0.739377	1	gene21334;gene7209	K07375+K07375
Phenylalanine metabolism	ko00360	12	166	0.00239859	0.191887	gene12965;gene13799;gene16732;gene19531;gene19767;gene22616;gene24221;gene27789;gene29690;gene4518;gene7752;gene7996	K00430+K00430+K00430+K00430+K01904+K00430+K10775+K10775+K00487+K00487+K00430+K00430
Phenylalanine, tyrosine and tryptophan biosynthesis	ko00400	1	53	0.782599	1	gene3305	K05359
Phenylpropanoid biosynthesis	ko00940	17	241	0.000404045	0.0323236	gene12965;gene13799;gene16210;gene16732;gene19531;gene19767;gene22616;gene24221;gene27789;gene29690;gene3123;gene3125;gene4518;gene5500;gene7605;gene7752;gene7996	K00430+K00430+K09755+K00430+K00430+K01904+K00430+K10775+K10775+K00487+K09753+K09753+K00487+K01188+K13066+K00430+K00430
Plant hormone signal transduction	ko04075	9	274	0.369524	1	gene12592;gene18778;gene2607;gene26208;gene27569;gene2774;gene28477;gene5072;gene7576	K14488+K13449+K13464+K13464+K14487+K14484+K13464+K14484+K14488
Plant-pathogen interaction	ko04626	10	226	0.105213	1	gene11609;gene13237;gene16443;gene16635;gene18778;gene193;gene22714;gene25572;gene4823;jujube_newGene_3241	K18875+K13448+K13447+K13448+K13449+K13459+K13448+K13457+K13447+K13457
Porphyrin and chlorophyll metabolism	ko00860	1	53	0.782599	1	gene18386	K02492
Propanoate metabolism	ko00640	3	33	0.0650482	1	gene11205;gene1181;gene8681	K00016+K01578+K05605
Proteasome	ko03050	1	57	0.806368	1	gene9196	K02728
Protein processing in endoplasmic reticulum	ko04141	1	230	0.998811	1	gene1248	K13993
Pyruvate metabolism	ko00620	3	97	0.520245	1	gene11205;gene12559;gene25711	K00016+K00029+K18881
Riboflavin metabolism	ko00740	1	18	0.403439	1	gene11700	K14379
Ribosome	ko03010	1	329	0.99994	1	jujube_newGene_2231	K02896
Selenocompound metabolism	ko00450	1	28	0.552603	1	gene18276	K01874
Sesquiterpenoid and triterpenoid biosynthesis	ko00909	4	32	0.0118944	0.951553	gene14606;gene14733;gene19066;gene2205	K15813+K15813+K00511+K15803
Sphingolipid metabolism	ko00600	4	31	0.0106365	0.850919	gene13489;gene13530;gene14025;gene1562	K04713+K17108+K07407+K04712
Starch and sucrose metabolism	ko00500	14	269	0.0191362	1	gene14375;gene15728;gene17029;gene21704;gene21709;gene21813;gene24030;gene2511;gene28523;gene30106;gene32506;gene32846;gene5500;gene7040	K08679+K01051+K01193+K01193+K01087+K01177+K00844+K01051+K01051+K01051+K00975+K01051+K01188+K01193
Steroid biosynthesis	ko00100	2	31	0.217773	1	gene19066;gene635	K00511+K09832
Stilbenoid, diarylheptanoid and gingerol biosynthesis	ko00945	2	28	0.186606	1	gene29690;gene4518	K00487+K00487
Sulfur metabolism	ko00920	3	53	0.187916	1	gene1214;gene25260;gene775	K05907+K08738+K00640
Synthesis and degradation of ketone bodies	ko00072	3	9	0.00163816	0.131053	gene25889;gene28729;gene33132	K01641+K01641+K01641
Taurine and hypotaurine metabolism	ko00430	2	17	0.0817373	1	gene17197;gene8329	K18592+K01580
Terpenoid backbone biosynthesis	ko00900	9	66	8.46212e-05	0.0067697	gene16110;gene16205;gene1708;gene2374;gene25889;gene28729;gene33132;gene5847;gene852	K00021+K00021+K00021+K13789+K01641+K01641+K01641+K01597+K00787
Ubiquinone and other terpenoid-quinone biosynthesis	ko00130	3	42	0.114326	1	gene19767;gene29690;gene4518	K01904+K00487+K00487
Valine, leucine and isoleucine biosynthesis	ko00290	2	29	0.19693	1	gene23295;gene343	K01754+K01703
Valine, leucine and isoleucine degradation	ko00280	4	71	0.140043	1	gene25889;gene28729;gene33132;gene8681	K01641+K01641+K01641+K05605
Vitamin B6 metabolism	ko00750	2	16	0.0734427	1	gene16161;gene2740	K00831+K13248

## Sheet: CJ vs. NJ
KEGG Pathway	ko_ID	DEG Number	Gene Number	P-value	Corrected_P-value	Gene IDs
alpha-Linolenic acid metabolism	ko00592	4	58	0.0205367	1	gene12481;gene15764;gene15917;gene5490	K01723+K05894+K05894+K00454
Amino sugar and nucleotide sugar metabolism	ko00520	5	165	0.179859	1	gene14375;gene1830;gene1837;gene32506;gene7234	K08679+K01183+K01183+K00975+K01183
Aminoacyl-tRNA biosynthesis	ko00970	1	69	0.719863	1	gene18276	K01874
Arginine and proline metabolism	ko00330	3	98	0.26276	1	gene18437;gene22760;gene26086	K01583+K13366+K13366
Ascorbate and aldarate metabolism	ko00053	1	55	0.63686	1	gene23996	K00469
Base excision repair	ko03410	1	63	0.686882	1	gene28075	K01246
beta-Alanine metabolism	ko00410	2	61	0.304314	1	gene22760;gene26086	K13366+K13366
Biosynthesis of amino acids	ko01230	1	289	0.995671	1	gene24860	K00873
Brassinosteroid biosynthesis	ko00905	2	33	0.119998	1	gene20290;gene20292	K15639+K15639
Carbon fixation in photosynthetic organisms	ko00710	1	73	0.739915	1	gene6531	K01100
Carbon metabolism	ko01200	3	278	0.887987	1	gene1805;gene24860;gene6531	K00131+K00873+K01100
Carotenoid biosynthesis	ko00906	1	47	0.57894	1	gene30271	K09840
Circadian rhythm - plant	ko04712	4	57	0.0193836	1	gene12805;gene14583;gene19560;gene2716	K12125+K00660+K00660+K12125
Cyanoamino acid metabolism	ko00460	2	107	0.583315	1	gene29353;gene5502	K08248+K01188
Cysteine and methionine metabolism	ko00270	1	102	0.848456	1	gene11205	K00016
Degradation of aromatic compounds	ko01220	1	12	0.197584	1	gene4518	K00487
Diterpenoid biosynthesis	ko00904	1	39	0.51189	1	gene17826	K04125
Endocytosis	ko04144	2	174	0.830731	1	gene21151;gene23135	K12489+K07889
Ether lipid metabolism	ko00565	1	31	0.434288	1	gene3704	K01114
Fatty acid biosynthesis	ko00061	1	64	0.692634	1	gene2983	K10781
Fatty acid metabolism	ko01212	1	95	0.827306	1	gene2983	K10781
Flavone and flavonol biosynthesis	ko00944	1	3	0.0535019	1	gene11393	K05280
Flavonoid biosynthesis	ko00941	7	50	2.77252e-05	0.00171896	gene11393;gene12386;gene14583;gene19560;gene20705;gene4518;gene6363	K05280+K13082+K00660+K00660+K05277+K00487+K01859
Galactose metabolism	ko00052	2	88	0.477717	1	gene4580;gene8088	K18819+K06617
Glycerophospholipid metabolism	ko00564	1	99	0.839726	1	gene3704	K01114
Glycolysis / Gluconeogenesis	ko00010	4	143	0.261209	1	gene11205;gene1805;gene21522;gene24860	K00016+K00131+K01792+K00873
Inositol phosphate metabolism	ko00562	3	77	0.163645	1	gene23996;gene2517;gene3704	K00469+K00921+K01114
Isoflavonoid biosynthesis	ko00943	1	6	0.104169	1	gene29180	K13260
Linoleic acid metabolism	ko00591	2	18	0.0413471	1	gene4863;gene5490	K15718+K00454
Monoterpenoid biosynthesis	ko00902	1	18	0.281347	1	gene28648	K15095
Oxidative phosphorylation	ko00190	3	125	0.397373	1	gene24244;gene30031;jujube_newGene_1603	K02152+K02132+K05577
Pentose and glucuronate interconversions	ko00040	1	118	0.887652	1	gene28523	K01051
Pentose phosphate pathway	ko00030	1	66	0.703826	1	gene1805	K00131
Phagosome	ko04145	4	92	0.0853787	1	gene23135;gene24244;gene2517;gene7209	K07889+K02152+K00921+K07375
Phenylalanine metabolism	ko00360	6	166	0.0803782	1	gene1232;gene17086;gene25830;gene4518;gene6713;gene6715	K00430+K00430+K00430+K00487+K00430+K00430
Phenylpropanoid biosynthesis	ko00940	8	241	0.0703717	1	gene1232;gene15673;gene17086;gene25830;gene4518;gene5502;gene6713;gene6715	K00430+K13066+K00430+K00430+K00487+K01188+K00430+K00430
Phosphatidylinositol signaling system	ko04070	1	76	0.754015	1	gene2517	K00921
Photosynthesis	ko00195	1	49	0.594225	1	jujube_newGene_2777	K02637
Photosynthesis - antenna proteins	ko00196	2	18	0.0413471	1	gene2133;gene9464	K08914+K08913
Plant hormone signal transduction	ko04075	6	274	0.379447	1	gene17084;gene18421;gene2607;gene27569;gene28171;gene7576	K14498+K14488+K13464+K14487+K14515+K14488
Plant-pathogen interaction	ko04626	6	226	0.2268	1	gene11609;gene16443;gene16635;gene21597;gene22590;gene28366	K18875+K13447+K13448+K04079+K13424+K13447
Porphyrin and chlorophyll metabolism	ko00860	2	53	0.25017	1	gene15485;gene18386	K04035+K02492
Propanoate metabolism	ko00640	1	33	0.454763	1	gene11205	K00016
Protein export	ko03060	1	50	0.60166	1	gene18291	K09490
Protein processing in endoplasmic reticulum	ko04141	10	230	0.00847977	0.525745	gene18291;gene18982;gene19137;gene19141;gene19985;gene21597;gene27208;gene27535;gene7033;gene9697	K09490+K06689+K06689+K06689+K13993+K04079+K09503+K09503+K13993+K13993
Purine metabolism	ko00230	1	176	0.962321	1	gene24860	K00873
Pyrimidine metabolism	ko00240	1	151	0.93957	1	gene10421	K01493
Pyruvate metabolism	ko00620	2	97	0.529723	1	gene11205;gene24860	K00016+K00873
Riboflavin metabolism	ko00740	1	18	0.281347	1	gene11700	K14379
Ribosome	ko03010	1	329	0.99801	1	jujube_newGene_2223	K02946
Ribosome biogenesis in eukaryotes	ko03008	1	118	0.887652	1	jujube_newGene_1236	K07936
RNA transport	ko03013	4	217	0.560261	1	gene18263;gene515;jujube_newGene_1236;jujube_newGene_2646	K12160+K14297+K07936+K03231
Selenocompound metabolism	ko00450	1	28	0.402139	1	gene18276	K01874
Sesquiterpenoid and triterpenoid biosynthesis	ko00909	3	32	0.0196785	1	gene14606;gene14733;gene19066	K15813+K15813+K00511
Starch and sucrose metabolism	ko00500	6	269	0.362971	1	gene14375;gene21709;gene21813;gene28523;gene32506;gene5502	K08679+K01087+K01177+K01051+K00975+K01188
Steroid biosynthesis	ko00100	1	31	0.434288	1	gene19066	K00511
Stilbenoid, diarylheptanoid and gingerol biosynthesis	ko00945	1	28	0.402139	1	gene4518	K00487
Terpenoid backbone biosynthesis	ko00900	2	66	0.337866	1	gene16110;gene16205	K00021+K00021
Tropane, piperidine and pyridine alkaloid biosynthesis	ko00960	1	34	0.464724	1	gene22155	K08081
Ubiquinone and other terpenoid-quinone biosynthesis	ko00130	1	42	0.53819	1	gene4518	K00487
Ubiquitin mediated proteolysis	ko04120	4	141	0.253188	1	gene11275;gene18982;gene19137;gene19141	K10581+K06689+K06689+K06689
Vitamin B6 metabolism	ko00750	1	16	0.254436	1	gene2740	K13248

## Sheet: NJ vs. NM
KEGG Pathway	ko_ID	DEG Number	Gene Number	P-value	Corrected_P-value	Gene IDs
2-Oxocarboxylic acid metabolism	ko01210	3	73	0.754145	1	gene27231;gene29555;gene3672	K01438+K01653+K01653
ABC transporters	ko02010	1	31	0.817174	1	gene20019	K05658
Alanine, aspartate and glutamate metabolism	ko00250	2	61	0.843764	1	gene3692;gene8329	K00830+K01580
alpha-Linolenic acid metabolism	ko00592	4	58	0.372339	1	gene13568;gene18203;gene21732;gene5493	K05894+K18857+K00232+K00454
Amino sugar and nucleotide sugar metabolism	ko00520	12	165	0.166961	1	gene11412;gene12381;gene14375;gene16137;gene29140;gene2935;gene29658;gene32506;gene6025;gene7234;gene9302;gene9366	K01183+K00975+K08679+K00847+K13648+K01183+K01810+K00975+K00966+K01183+K00975+K12448
Aminoacyl-tRNA biosynthesis	ko00970	4	69	0.504306	1	gene1351;gene18336;gene19768;gene25030	K01883+K01893+K01872+K01872
Arachidonic acid metabolism	ko00590	3	19	0.076798	1	gene21329;gene23998;gene24003	K00432+K18592+K18592
Arginine and proline metabolism	ko00330	2	98	0.970323	1	gene19826;gene27231	K01611+K01438
Ascorbate and aldarate metabolism	ko00053	5	55	0.166528	1	gene16281;gene16460;gene23996;gene25849;gene29070	K00434+K00469+K00469+K10047+K00434
Basal transcription factors	ko03022	2	47	0.722391	1	gene17968;gene2664	K03127+K03133
beta-Alanine metabolism	ko00410	5	61	0.222735	1	gene14662;gene18223;gene19710;gene8329;gene8681	K05605+K01918+K01464+K01580+K05605
Biosynthesis of amino acids	ko01230	9	289	0.975305	1	gene19938;gene24195;gene27231;gene28288;gene29372;gene29555;gene3672;gene5151;jujube_newGene_1734	K00134+K00058+K01438+K01626+K01626+K01653+K01653+K01738+K00058
Biosynthesis of unsaturated fatty acids	ko01040	3	43	0.40288	1	gene13714;gene19996;gene21732	K03921+K10251+K00232
Biotin metabolism	ko00780	2	27	0.42498	1	gene19115;gene2548	K02372+K09458
Brassinosteroid biosynthesis	ko00905	4	33	0.0956431	1	gene15602;gene2750;jujube_newGene_1945;jujube_newGene_796	K09591+K12638+K15639+K12640
Butanoate metabolism	ko00650	3	31	0.226432	1	gene29555;gene3672;gene8329	K01653+K01653+K01580
C5-Branched dibasic acid metabolism	ko00660	2	12	0.131	1	gene29555;gene3672	K01653+K01653
Caffeine metabolism	ko00232	1	2	0.103563	1	gene5977	K00365
Carbon fixation in photosynthetic organisms	ko00710	5	73	0.347399	1	gene13499;gene19938;gene22113;gene23765;gene9812	K01610+K00134+K03841+K01595+K01602
Carbon metabolism	ko01200	17	278	0.309139	1	gene13499;gene14662;gene19938;gene21795;gene22113;gene23765;gene24195;gene28031;gene29642;gene29658;gene32372;gene3630;gene3692;gene5151;gene8681;gene9812;jujube_newGene_1734	K01610+K05605+K00134+K00851+K03841+K01595+K00058+K00605+K00236+K01810+K00658+K00605+K00830+K01738+K05605+K01602+K00058
Carotenoid biosynthesis	ko00906	5	47	0.102385	1	gene14207;gene1854;gene30271;gene3979;gene7425	K02293+K09840+K09840+K09843+K15746
Circadian rhythm - plant	ko04712	2	57	0.815139	1	gene23;gene29300	K12115+K16241
Citrate cycle (TCA cycle)	ko00020	4	57	0.360033	1	gene13499;gene29642;gene32372;gene4583	K01610+K00236+K00658+K01648
Cutin, suberine and wax biosynthesis	ko00073	1	32	0.826954	1	gene3816	K15401
Cyanoamino acid metabolism	ko00460	9	107	0.114598	1	gene18058;gene20388;gene23413;gene23998;gene24003;gene28068;gene29353;gene3233;gene694	K01188+K01188+K08248+K18592+K18592+K05350+K08248+K13035+K08248
Cysteine and methionine metabolism	ko00270	4	102	0.80009	1	gene19826;gene5151;gene727;jujube_newGene_707	K01611+K01738+K05933+K01251
Diterpenoid biosynthesis	ko00904	4	39	0.151055	1	gene21876;gene21878;gene6063;gene643	K04123+K04123+K17961+K04125
DNA replication	ko03030	3	70	0.728212	1	gene16487;gene23341;jujube_newGene_2435	K10756+K10740+K02541
Endocytosis	ko04144	10	174	0.447524	1	gene1447;gene17913;gene27233;gene2839;gene28733;gene2890;gene2891;gene4545;gene6206;jujube_newGene_2133	K01115+K15053+K12483+K07889+K01115+K03283+K03283+K12193+K18443+K12185
Ether lipid metabolism	ko00565	2	31	0.496908	1	gene1447;gene28733	K01115+K01115
Fatty acid biosynthesis	ko00061	4	64	0.445435	1	gene13714;gene17831;gene19115;gene2548	K03921+K01897+K02372+K09458
Fatty acid degradation	ko00071	3	57	0.591354	1	gene17831;gene18203;gene21732	K01897+K18857+K00232
Fatty acid elongation	ko00062	2	47	0.722391	1	gene19996;gene23619	K10251+K15397
Fatty acid metabolism	ko01212	6	95	0.393583	1	gene13714;gene17831;gene19115;gene19996;gene21732;gene2548	K03921+K01897+K02372+K10251+K00232+K09458
Flavonoid biosynthesis	ko00941	4	50	0.274476	1	gene11182;gene16247;gene21789;gene6363	K13081+K00475+K05277+K01859
Fructose and mannose metabolism	ko00051	3	76	0.778057	1	gene16137;gene22113;gene6025	K00847+K03841+K00966
Galactose metabolism	ko00052	6	88	0.326109	1	gene11866;gene17029;gene21704;gene24479;gene31367;gene4580	K07407+K01193+K01193+K18819+K18819+K18819
Glutathione metabolism	ko00480	11	120	0.053364	1	gene11068;gene15380;gene16281;gene18173;gene21329;gene23998;gene24003;gene29070;gene33079;gene3869;gene8735	K00799+K00799+K00434+K00799+K00432+K18592+K18592+K00434+K00799+K00799+K00799
Glycerolipid metabolism	ko00561	5	65	0.262984	1	gene11866;gene2118;gene22072;gene3048;jujube_newGene_1446	K07407+K00901+K13508+K00864+K09480
Glycerophospholipid metabolism	ko00564	4	99	0.780671	1	gene1447;gene2118;gene22072;gene28733	K01115+K00901+K13508+K01115
Glycine, serine and threonine metabolism	ko00260	6	81	0.260566	1	gene24195;gene28031;gene2809;gene3630;gene3692;jujube_newGene_1734	K00058+K00605+K15919+K00605+K00830+K00058
Glycolysis / Gluconeogenesis	ko00010	5	143	0.885479	1	gene13499;gene18203;gene19938;gene22113;gene29658	K01610+K18857+K00134+K03841+K01810
Glycosphingolipid biosynthesis - globo series	ko00603	1	16	0.58346	1	gene11866	K07407
Glycosylphosphatidylinositol(GPI)-anchor biosynthesis	ko00563	3	37	0.314296	1	jujube_newGene_2150;jujube_newGene_742;jujube_newGene_791	K05289+K05289+K05289
Glyoxylate and dicarboxylate metabolism	ko00630	6	70	0.166901	1	gene2542;gene2544;gene26791;gene2809;gene3692;gene9812	K11517+K11517+K00284+K15919+K00830+K01602
Homologous recombination	ko03440	2	59	0.829992	1	gene23341;gene4708	K10740+K10901
Inositol phosphate metabolism	ko00562	5	77	0.39039	1	gene16460;gene17216;gene23996;gene2517;gene25849	K00469+K01858+K00469+K00921+K10047
Isoflavonoid biosynthesis	ko00943	1	6	0.279713	1	gene29180	K13260
Linoleic acid metabolism	ko00591	2	18	0.248002	1	gene32639;gene5493	K15718+K00454
Lysine degradation	ko00310	1	33	0.836213	1	gene32372	K00658
Mismatch repair	ko03430	2	47	0.722391	1	gene16487;gene23341	K10756+K10740
Monoterpenoid biosynthesis	ko00902	1	18	0.626722	1	gene25746	K15095
mRNA surveillance pathway	ko03015	6	142	0.775396	1	gene19345;gene23291;gene25856;gene30101;gene5256;gene6387	K14396+K13126+K14411+K12881+K06965+K14399
Nitrogen metabolism	ko00910	2	42	0.662826	1	gene18739;gene26791	K00366+K00284
Non-homologous end-joining	ko03450	1	8	0.354388	1	gene14797	K10886
Nucleotide excision repair	ko03420	2	70	0.894029	1	gene16487;gene23341	K10756+K10740
One carbon pool by folate	ko00670	2	22	0.328303	1	gene28031;gene3630	K00605+K00605
Other glycan degradation	ko00511	1	22	0.70027	1	gene18672	K15923
Oxidative phosphorylation	ko00190	5	125	0.803307	1	gene29642;gene30031;gene3047;gene5551;jujube_newGene_1603	K00236+K02132+K01507+K02154+K05577
Pantothenate and CoA biosynthesis	ko00770	4	36	0.121987	1	gene18223;gene19710;gene29555;gene3672	K01918+K01464+K01653+K01653
Pentose and glucuronate interconversions	ko00040	5	118	0.760809	1	gene10633;gene15728;gene28523;gene6038;gene6828	K01728+K01051+K01051+K01728+K01051
Pentose phosphate pathway	ko00030	3	66	0.690381	1	gene21795;gene22113;gene29658	K00851+K03841+K01810
Peroxisome	ko04146	5	98	0.603395	1	gene17831;gene21732;gene2542;gene2544;gene3692	K01897+K00232+K11517+K11517+K00830
Phagosome	ko04145	7	92	0.216579	1	gene23904;gene2517;gene2839;gene32631;gene33258;gene5551;gene7209	K07374+K00921+K07889+K07374+K07374+K02154+K07375
Phenylalanine metabolism	ko00360	10	166	0.389044	1	gene1232;gene12965;gene13799;gene19531;gene22615;gene22616;gene28590;gene4419;gene75;gene7752	K00430+K00430+K00430+K00430+K00430+K00430+K00430+K01904+K01904+K00430
Phenylalanine, tyrosine and tryptophan biosynthesis	ko00400	2	53	0.78193	1	gene28288;gene29372	K01626+K01626
Phenylpropanoid biosynthesis	ko00940	17	241	0.140705	1	gene1232;gene12965;gene13799;gene16870;gene18058;gene19531;gene20388;gene22615;gene22616;gene23129;gene28068;gene28590;gene3122;gene3123;gene4419;gene75;gene7752	K00430+K00430+K00430+K00083+K01188+K00430+K01188+K00430+K00430+K12355+K05350+K00430+K09753+K09753+K01904+K01904+K00430
Phosphatidylinositol signaling system	ko04070	3	76	0.778057	1	gene2118;gene2517;gene25849	K00901+K00921+K10047
Photosynthesis	ko00195	4	49	0.262499	1	gene17440;gene20001;gene3240;gene79	K02701+K02723+K14332+K02698
Photosynthesis - antenna proteins	ko00196	2	18	0.248002	1	gene19246;gene9294	K08917+K08909
Plant hormone signal transduction	ko04075	17	274	0.28832	1	gene12141;gene17084;gene17194;gene17820;gene18417;gene18421;gene18778;gene19988;gene23069;gene23244;gene25663;gene2774;gene28477;gene32487;gene3254;gene3897;gene7093	K14492+K14498+K14431+K14490+K14488+K14488+K13449+K14491+K14484+K14484+K14487+K14484+K13464+K14494+K14431+K14497+K14497
Plant-pathogen interaction	ko04626	12	226	0.546446	1	gene11609;gene13121;gene18778;gene21841;gene22590;gene25583;gene28086;gene3048;gene8783;gene8932;gene958;gene9586	K18875+K13414+K13449+K13457+K13424+K13457+K13448+K00864+K13448+K13448+K13448+K13429
Porphyrin and chlorophyll metabolism	ko00860	2	53	0.78193	1	gene27885;gene3682	K13606+K13071
Propanoate metabolism	ko00640	2	33	0.53067	1	gene14662;gene8681	K05605+K05605
Proteasome	ko03050	4	57	0.360033	1	gene18487;gene28941;gene9196;jujube_newGene_1749	K03064+K03031+K02728+K03064
Protein export	ko03060	3	50	0.501595	1	gene13536;gene18291;gene4829	K03105+K09490+K09490
Protein processing in endoplasmic reticulum	ko04141	17	230	0.103708	1	gene15235;gene16134;gene16436;gene17973;gene18291;gene19141;gene2890;gene2891;gene3851;gene3930;gene3931;gene3932;gene3934;gene3936;gene4829;gene6579;jujube_newGene_357	K10950+K13993+K14001+K09584+K09490+K06689+K03283+K03283+K13993+K13993+K13993+K13993+K13993+K13993+K09490+K13993+K14016
Purine metabolism	ko00230	4	176	0.98663	1	gene11976;gene17652;gene26041;gene5977	K03012+K03022+K03012+K00365
Pyrimidine metabolism	ko00240	6	151	0.822924	1	gene10307;gene11976;gene17652;gene19710;gene26041;gene3730	K00384+K03012+K03022+K01464+K03012+K16329
Pyruvate metabolism	ko00620	2	97	0.9689	1	gene13499;gene23765	K01610+K01595
Regulation of autophagy	ko04140	2	38	0.608127	1	gene1223;gene29036	K08341+K08336
Ribosome	ko03010	15	329	0.772246	1	gene12459;gene19474;gene19556;gene21599;gene25802;gene28017;gene29496;gene30050;gene30350;gene30910;gene31499;gene4813;gene9359;jujube_newGene_1557;jujube_newGene_2223	K02907+K02935+K02978+K02947+K02966+K02980+K02960+K02921+K02960+K02955+K02939+K02979+K02901+K02982+K02946
Ribosome biogenesis in eukaryotes	ko03008	7	118	0.439616	1	gene28027;gene30139;gene3633;gene9361;jujube_newGene_1236;jujube_newGene_1237;jujube_newGene_291	K14557+K14546+K14557+K03537+K07936+K07936+K12619
RNA degradation	ko03018	5	144	0.889032	1	gene10370;gene10501;gene23291;gene31149;jujube_newGene_291	K12617+K12617+K13126+K12581+K12619
RNA polymerase	ko03020	3	52	0.528282	1	gene11976;gene17652;gene26041	K03012+K03022+K03012
RNA transport	ko03013	7	217	0.949176	1	gene18263;gene20075;gene23291;gene30101;gene9361;jujube_newGene_1236;jujube_newGene_1237	K12160+K00784+K13126+K12881+K03537+K07936+K07936
Selenocompound metabolism	ko00450	1	28	0.784403	1	gene10307	K00384
Sesquiterpenoid and triterpenoid biosynthesis	ko00909	1	32	0.826954	1	gene16825	K00511
Sphingolipid metabolism	ko00600	2	31	0.496908	1	gene11866;gene27959	K07407+K04715
Spliceosome	ko03040	8	221	0.909998	1	gene19904;gene25048;gene26528;gene28548;gene2890;gene2891;gene30101;jujube_newGene_2082	K12815+K12815+K12821+K12893+K03283+K03283+K12881+K12819
Starch and sucrose metabolism	ko00500	21	269	0.0479116	1	gene10012;gene12381;gene14375;gene15728;gene16137;gene17029;gene18058;gene20388;gene21704;gene28068;gene28523;gene29140;gene29658;gene32400;gene32506;gene33044;gene3843;gene574;gene6828;gene7291;gene9302	K00703+K00975+K08679+K01051+K00847+K01193+K01188+K01188+K01193+K05350+K01051+K13648+K01810+K00696+K00975+K01176+K00696+K16055+K01051+K01087+K00975
Steroid biosynthesis	ko00100	2	31	0.496908	1	gene10027;gene16825	K01853+K00511
Sulfur metabolism	ko00920	4	53	0.310887	1	gene23737;gene5151;gene5446;jujube_newGene_388	K00392+K01738+K00392+K00392
Taurine and hypotaurine metabolism	ko00430	3	17	0.0582245	1	gene23998;gene24003;gene8329	K18592+K18592+K01580
Terpenoid backbone biosynthesis	ko00900	3	66	0.690381	1	gene16110;gene3796;jujube_newGene_1202	K00021+K11778+K13789
Tropane, piperidine and pyridine alkaloid biosynthesis	ko00960	2	34	0.546965	1	gene21045;gene22157	K08081+K08081
Tryptophan metabolism	ko00380	1	33	0.836213	1	gene10646	K16903
Tyrosine metabolism	ko00350	1	63	0.968688	1	gene18203	K18857
Ubiquinone and other terpenoid-quinone biosynthesis	ko00130	3	42	0.388264	1	gene29291;gene4419;gene75	K00591+K01904+K01904
Ubiquitin mediated proteolysis	ko04120	4	141	0.947676	1	gene1629;gene19141;gene28018;gene29817	K10581+K06689+K10590+K10580
Valine, leucine and isoleucine biosynthesis	ko00290	2	29	0.461643	1	gene29555;gene3672	K01653+K01653
Valine, leucine and isoleucine degradation	ko00280	3	71	0.737085	1	gene14662;gene24522;gene8681	K05605+K00020+K05605
Vitamin B6 metabolism	ko00750	1	16	0.58346	1	gene12359	K13248
Zeatin biosynthesis	ko00908	1	40	0.888576	1	gene10216	K00279
