# Supplementary material for: Comparative Transcriptomic Analyses of Different Jujube Cultivars Reveal the Co-Regulation of Multiple Pathways during Fruit Cracking
Source: Genes (Basel). 2022 Jan 2;13(1):105. doi: 10.3390/genes13010105 (PMC8775106; doi:10.3390/genes13010105)
Supplement: Supplementary file 1 [file genes-13-00105-s001.zip › Table S7.xls]

## Sheet: Sheet2
Table S7 DEGs involved in important processes during fruit cracking.
Venn analysis in ‘Cuizaohong’ and ‘Jinsixiaozao’
gene name	gene ID	symbol	description
cell wall
gene1181(CC vs. NC)	LOC107420719	--	malonyl-CoA decarboxylase, mitochondrial
gene2930(CC vs. NC)	LOC107406019	CHI4	Endochitinase PR4
gene2935(CC vs. NC)	LOC107406053	CHI4	Endochitinase PR4
gene16151(CC vs. NC)	LOC107424313	--	Endochitinase
gene26291(CC vs. NC)	LOC107435326	ABCG36	ABC transporter G family member 36
gene26313(CC vs. NC)	LOC107435344	ABCG36	ABC transporter G family member 36
gene15728(CC vs. NC)	LOC107423848	PME3	Pectinesterase 3
gene30106(CC vs. NC)	LOC107406730	PME17	Pectinesterase 17
gene2511(CC vs. NC)	LOC107434297	PME3	Pectinesterase 3
gene32846(CC vs. NC)	LOC107409699	PME3	Pectinesterase 3
gene16441(CC vs. NC)	LOC107424622	XTH	Probable xyloglucan endotransglucosylase/hydrolase protein B
gene13799(CC vs. NC)	LOC107421730	PER12	Peroxidase 12
gene19652(CC vs. NC)	LOC107428073	OFUT1	Uncharacterized protein At1g04910
gene18952(CC vs. NC)	LOC107427312	EXLA1	Expansin-like A1
gene7996(CC vs. NC)	LOC107415435	PER31	Peroxidase 31
gene6879(CC vs. NC)	LOC107414178	--	L-ascorbate oxidase homolog
gene11339(CC vs. NC)	LOC107419027	COB	Protein COBRA
gene27336(CC vs. NC)	LOC107403720	SKU5	Monocopper oxidase-like protein SKU5
gene21704(CC vs. NC)	LOC107430302	INVA	Acid beta-fructofuranosidase 38 kDa subunit
gene25683(CC vs. NC)	LOC107434670	SBT1.7	Subtilisin-like protease
gene7752(CC vs. NC)	LOC107415104	PER15	Peroxidase 15
gene17197(CC vs. NC)	LOC107425414	GGT1	Gamma-glutamyltranspeptidase 1
jujube_newGene_2911(CC vs. NC)	--	XTH22	Xyloglucan endotransglucosylase/hydrolase protein 22
gene5086(CC vs. NC)	LOC107412153	--	Pathogenesis-related protein PR-4B
gene559(CC vs. NC)	LOC107412897	XTH15	Probable xyloglucan endotransglucosylase/hydrolase protein 15
gene13710(CC vs. NC)	LOC107421631	SCPL42	Serine carboxypeptidase-like 42
gene16808(CC vs. NC)	LOC107425034	XTH6	Probable xyloglucan endotransglucosylase/hydrolase protein 6
gene5533(CC vs. NC)	LOC107412685	ANT	ADP,ATP carrier protein, mitochondrial
gene9373(CC vs. NC)	LOC107416878	XTH9	Xyloglucan endotransglucosylase/hydrolase protein 9
gene10498(CC vs. NC)	LOC107418102	MPT3	Mitochondrial phosphate carrier protein 3, mitochondrial
gene28523(CC vs. NC_CJ vs. NJ)	LOC107405035	PME40	Pectinesterase 40
gene14330(CC vs. NC_CJ vs. NJ)	LOC107422327	XTH2	Xyloglucan endotransglucosylase/hydrolase 2
gene5568(CC vs. NC_CJ vs. NJ)	LOC107412713	DRT100	DNA-damage-repair/toleration protein DRT100
gene19193(CC vs. NC_CJ vs. NJ)	LOC107427557	XTH2	Xyloglucan endotransglucosylase/hydrolase 2
gene21597(CJ vs. NJ)	LOC107430166	HSP83A	Heat shock protein 83
gene15695(CJ vs. NJ)	LOC107423798	GLDH	L-galactono-1,4-lactone dehydrogenase, mitochondrial
gene27208(CJ vs. NJ)	LOC107403577	DNAJ1	DnaJ protein homolog
gene18265(CJ vs. NJ)	LOC107426638	XTH2	Xyloglucan endotransglucosylase/hydrolase protein 2
gene27535(CJ vs. NJ)	LOC107403934	DNAJ1	DnaJ protein homolog
cuticle structure
gene13489(CC vs. NC)	LOC107421380	SBH2	Sphinganine C(4)-monooxygenase 2
gene26332(CC vs. NC)	LOC107435376	FATB1	Palmitoyl-acyl carrier protein thioesterase, chloroplastic
gene1562(CC vs. NC)	LOC107423895	At4g04930	Sphingolipid delta(4)-desaturase DES1-like
jujube_newGene_3275(CC vs. NC)	--	FAH1	Fatty acid 2-hydroxylase 1
gene1181(CC vs. NC)	LOC107420719	--	malonyl-CoA decarboxylase, mitochondrial
gene12559(CC vs. NC)	LOC107420388	NADP-ME	NADP-dependent malic enzyme
gene12965(CC vs. NC)	LOC107420792	PER45	Peroxidase 45
gene13799(CC vs. NC)	LOC107421730	PER12	Peroxidase 12
gene16210(CC vs. NC)	LOC107424406	CYP84A1	Cytochrome P450 84A1
gene16732(CC vs. NC)	LOC107424909	PER51	Peroxidase 51
gene19531(CC vs. NC)	LOC107427935	PER55	Peroxidase 55
gene19767(CC vs. NC)	LOC107428173	4CL1	4-coumarate--CoA ligase 1
gene22616(CC vs. NC)	LOC107431275	PNC1	Cationic peroxidase 1
gene24221(CC vs. NC)	LOC107433056	PAL	Phenylalanine ammonia-lyase
gene27789(CC vs. NC)	LOC107404213	PAL	Phenylalanine ammonia-lyase
gene29690(CC vs. NC)	LOC107406287	CYP73A4	Trans-cinnamate 4-monooxygenase
gene3123(CC vs. NC)	LOC107408651	CCR1	Cinnamoyl-CoA reductase 1
gene3125(CC vs. NC)	LOC107408760	CCR1	Cinnamoyl-CoA reductase 1
gene5500(CC vs. NC)	LOC107412668	BGLU13	Beta-glucosidase 13
gene7605(CC vs. NC)	LOC107414982	COMT1	Caffeic acid 3-O-methyltransferase
gene7752(CC vs. NC)	LOC107415104	PER15	Peroxidase 15
gene7996(CC vs. NC)	LOC107415435	PER31	Peroxidase 31
gene4863(CC vs. NC_CJ vs. NJ)	LOC107412008	LOX1.5	Probable linoleate 9S-lipoxygenase 5
gene5490(CC vs. NC_CJ vs. NJ)	LOC107412659	LOX2.1	Linoleate 13S-lipoxygenase 2-1, chloroplastic
gene15764(CC vs. NC_CJ vs. NJ)	LOC107423912	OPR3	12-oxophytodienoate reductase 3
gene12481(CC vs. NC_CJ vs. NJ)	LOC107420290	CYP74A	Allene oxide synthase, chloroplastic
gene14606(CC vs. NC_CJ vs. NJ)	LOC107422619	LUS	Lupeol synthase
gene14733(CC vs. NC_CJ vs. NJ)	LOC107422768	LUS	Lupeol synthase
gene20705(CC vs. NC_CJ vs. NJ)	LOC107429214	ANS	Leucoanthocyanidin dioxygenase
gene30271(CC vs. NC_CJ vs. NJ)	LOC107406906	NCED1	9-cis-epoxycarotenoid dioxygenase NCED1, chloroplastic
gene15917(CC vs. NC_CJ vs. NJ)	LOC107424087	OPR3	12-oxophytodienoate reductase 3
gene1232(CJ vs. NJ)	LOC107420772	PER42	Peroxidase 42
gene15673(CJ vs. NJ)	LOC107423795	OMT1	Caffeic acid 3-O-methyltransferase 1
gene17086(CJ vs. NJ)	LOC107425304	PER17	Peroxidase 17
gene25830(CJ vs. NJ)	LOC107434835	PER25	Peroxidase 25
gene5502(CJ vs. NJ)	LOC107412640	BGLU12	Beta-glucosidase 12
gene6713(CJ vs. NJ)	LOC107413963	PER4	Peroxidase 4
gene6715(CJ vs. NJ)	LOC107413966	PER4	Peroxidase 4
Ca ion
gene28984(CC vs. NC)	LOC107405517	CAX3	Vacuolar cation/proton exchanger 3
gene11339(CC vs. NC)	LOC107419027	COB	Protein COBRA
gene19764(CC vs. NC)	LOC107428192	CAX2	Vacuolar cation/proton exchanger 2
gene24237(CC vs. NC)	LOC107433071	PIP2-2	Aquaporin PIP2-2, N-terminally processed
BR biosynthesis
gene20290(CJ vs. NJ)	LOC107428769	CYP749A22	Cytochrome P450 CYP749A22
gene20292(CJ vs. NJ)	LOC107428756	CYP749A22	Cytochrome P450 CYP749A22
starch and sucrose metabolism
gene14375(CC vs. NC_CJ vs. NJ)	LOC107422361	GAE6	UDP-glucuronate 4-epimerase 6
gene21709(CC vs. NC_CJ vs. NJ)	LOC107430299	TPPG	Probable trehalose-phosphate phosphatase G
gene21813(CC vs. NC_CJ vs. NJ)	LOC107430415	BAM3	Beta-amylase 3, chloroplastic
gene28523(CC vs. NC_CJ vs. NJ)	LOC107405035	PME40	Pectinesterase 40
gene32506(CC vs. NC_CJ vs. NJ)	LOC107409332	APL3	Glucose-1-phosphate adenylyltransferase large subunit 3, chloroplastic
profile analysis in ‘Muzao’ and ‘Jinsixiaozao’
gene name	gene ID	symbol	description
cell wall
gene30427(profile1)	LOC107407081	PAT22	Probable protein S-acyltransferase 22
gene32056(profile1)	LOC107408840	FLA7	Fasciclin-like arabinogalactan protein 7
gene15640(profile1)	LOC107423710	FLA8	Fasciclin-like arabinogalactan protein 8
gene2548(profile1)	LOC107434672	KAS2	3-oxoacyl-[acyl-carrier-protein] synthase II, chloroplastic
gene4389(profile1)	LOC107411451	EXPA8	Expansin-A8
gene19138(profile1)	LOC107427516	EXPA15	Expansin-A15
gene13348(profile1)	LOC107421234	--	hypothetical protein PRUPE_ppa007452mg
gene16441(profile1)	LOC107424622	XTH	Probable xyloglucan endotransglucosylase/hydrolase protein B
gene559(profile1)	LOC107412897	XTH15	Probable xyloglucan endotransglucosylase/hydrolase protein 15
gene9373(profile1)	LOC107416878	XTH9	Xyloglucan endotransglucosylase/hydrolase protein 9
gene7885(profile1)	LOC107415228	At5g14450	GDSL esterase/lipase At5g14450
gene1470(profile1)	LOC107422761	Bp10	L-ascorbate oxidase homolog
gene3109(profile1)	LOC107408292	PDF1A	Peptide deformylase 1A, chloroplastic
jujube_newGene_2909(profile1)	--	--	Alpha-mannosidase, light subunit
gene17486(profile1)	LOC107425734	--	hypothetical protein PRUPE_ppa007461mg
gene15728(profile1)	LOC107423848	PME3	Pectinesterase 3
gene17358(profile1)	LOC107425602	PME51	Pectinesterase 51
gene17057(profile1)	LOC107425261	BGAL8	Beta-galactosidase 8
jujube_newGene_1749(profile1)	--	RPT4B	26S protease regulatory subunit S10B homolog B
gene23904(profile1)	LOC107432703	TUBA6	Tubulin alpha-6 chain
gene29496(profile1)	LOC107406080	RPS16	40S ribosomal protein S16
gene10454(profile7)	LOC107418064	EXO	Protein EXORDIUM
gene28757(profile7)	LOC107405271	EXO	Protein EXORDIUM
gene23768(profile7)	LOC107432508	EP1	Epidermis-specific secreted glycoprotein EP1
gene7752(profile7)	LOC107415104	PER15	Peroxidase 15
cuticle structure
gene1232(profile6)	LOC107420772	PER42	Peroxidase 42
gene13799(profile6)	LOC107421730	PER12	Peroxidase 12
gene16870(profile6)	LOC107425066	CAD	Probable mannitol dehydrogenase
gene19531(profile6)	LOC107427935	PER55	Peroxidase 55
gene20388(profile6)	LOC107428870	BGLU40	Beta-glucosidase 40
gene22615(profile6)	LOC107431273	PNC1	Cationic peroxidase 1
gene22616(profile6)	LOC107431275	PNC1	Cationic peroxidase 1
gene28590(profile6)	LOC107405097	PER4	Peroxidase 4
gene3122(profile6)	LOC107409091	CCR1	Cinnamoyl-CoA reductase 1
gene3123(profile6)	LOC107408651	CCR1	Cinnamoyl-CoA reductase 1
gene4419(profile6)	LOC107411478	4CLL7	4-coumarate--CoA ligase-like 7
gene643(profile7)	LOC107413744	GA2OX1	Gibberellin 2-beta-dioxygenase
gene16247(profile7)	LOC107424368	AN3	Naringenin,2-oxoglutarate 3-dioxygenase
gene30271(profile7)	LOC107406906	NCED1	9-cis-epoxycarotenoid dioxygenase NCED1, chloroplastic
hormone metabolism(BR and ABA)
gene15602(profile6)	LOC107423701	DET2	Steroid 5-alpha-reductase DET2
gene2750(profile6)	LOC107403831	CYP90D1	3-epi-6-deoxocathasterone 23-monooxygenase
jujube_newGene_1945(profile6)	--	CYP749A22	Cytochrome P450 CYP749A22
gene1854(profile7)	LOC107427259	NCED1	9-cis-epoxycarotenoid dioxygenase NCED1, chloroplastic
gene30271(profile7)	LOC107406906	NCED1	9-cis-epoxycarotenoid dioxygenase NCED1, chloroplastic
