# Supplementary material for: Comparative Transcriptomic Analyses of Different Jujube Cultivars Reveal the Co-Regulation of Multiple Pathways during Fruit Cracking
Source: Genes (Basel). 2022 Jan 2;13(1):105. doi: 10.3390/genes13010105 (PMC8775106; doi:10.3390/genes13010105)
Supplement: Supplementary file 1 [file genes-13-00105-s001.zip › Table S8.xls]

## Sheet: Sheet1
Table S8 Details regarding the DEGs used for the trend analysis in the NM, NJ and CJ samples.
GeneID	NM	NJ	CJ	gene_name	COG_class	COG_class_annotation	GO_annotation	KEGG_annotation	KEGG_pathway_annotation	Swiss_Prot_annotation	eggNOG_class	eggNOG_class_annotation	NR_annotation	GO_second_level_annotation
Profile 0
gene12631	7.509	1.94157	1.16137	LOC107420482	[R]	General function prediction only	Molecular Function: ATP-dependent peptidase activity (GO:0004176);; Biological Process: proteolysis (GO:0006508);;	--	--	--	O	Posttranslational modification, protein turnover, chaperones	PREDICTED: LON peptidase N-terminal domain and RING finger protein 1 [Malus domestica]	biological process: metabolic process (GO:0008152);; biological process: single-organism process (GO:0044699);; biological process: cellular process (GO:0009987);; molecular function: catalytic activity (GO:0003824);;
gene13499	9.84035	4.753	2.91406	LOC107421398	[C]	Energy production and conversion	Molecular Function: phosphoenolpyruvate carboxykinase (ATP) activity (GO:0004612);; Molecular Function: ATP binding (GO:0005524);; Biological Process: gluconeogenesis (GO:0006094);; Molecular Function: kinase activity (GO:0016301);; Biological Process: phosphorylation (GO:0016310);;	K01610|0|pper:PRUPE_ppa002490mg|hypothetical protein; K01610 phosphoenolpyruvate carboxykinase (ATP) [EC:4.1.1.49] (A)	Glycolysis / Gluconeogenesis (ko00010);; Citrate cycle (TCA cycle) (ko00020);; Pyruvate metabolism (ko00620);; Carbon fixation in photosynthetic organisms (ko00710);; Carbon metabolism (ko01200)	Phosphoenolpyruvate carboxykinase [ATP] GN=PCKA OS=Arabidopsis thaliana (Mouse-ear cress) PE=1 SV=1	C	Energy production and conversion	hypothetical protein PRUPE_ppa002490mg [Prunus persica]	biological process: cellular process (GO:0009987);; biological process: single-organism process (GO:0044699);; biological process: metabolic process (GO:0008152);; molecular function: binding (GO:0005488);; molecular function: catalytic activity (GO:0003824);;
gene13577	24.4266	8.71172	5.11961	LOC107421488	[E]	Amino acid transport and metabolism	Biological Process: transport (GO:0006810);; Cellular Component: membrane (GO:0016020);;	K14638|0|pmum:103339078|protein NRT1/ PTR FAMILY 5.10-like; K14638 solute carrier family 15 (peptide/histidine transporter), member 3/4 (A)	--	Protein NRT1/ PTR FAMILY 5.10 GN=NPF5.10 OS=Arabidopsis thaliana (Mouse-ear cress) PE=2 SV=1	E	Amino acid transport and metabolism	PREDICTED: protein NRT1/ PTR FAMILY 5.10-like [Prunus mume]	cellular component: membrane (GO:0016020);; biological process: localization (GO:0051179);;
gene14195	8.916	3.93232	2.74	LOC107422162	[C]	Energy production and conversion	Cellular Component: plasma membrane (GO:0005886);; Cellular Component: chloroplast envelope (GO:0009941);; Molecular Function: oxidoreductase activity (GO:0016491);; Biological Process: response to cadmium ion (GO:0046686);; Biological Process: oxidation-reduction process (GO:0055114);;	--	--	Probable aldo-keto reductase 2 OS=Oryza sativa subsp. japonica (Rice) PE=2 SV=2	C	Energy production and conversion	PREDICTED: probable aldo-keto reductase 2 [Prunus mume]	cellular component: organelle part (GO:0044422);; cellular component: membrane (GO:0016020);; cellular component: organelle (GO:0043226);; cellular component: cell part (GO:0044464);; cellular component: cell (GO:0005623);; biological process: response to stimulus (GO:0050896);; biological process: single-organism process (GO:0044699);; biological process: metabolic process (GO:0008152);; molecul…
gene14214	4.65741	1.47432	0.707472	LOC107422178	--	--	Molecular Function: Rho GDP-dissociation inhibitor activity (GO:0005094);; Cellular Component: cytoplasm (GO:0005737);;	K12462|1.48744e-66|tcc:TCM_020152|Immunoglobulin E-set superfamily protein isoform 1; K12462 Rho GDP-dissociation inhibitor (A)	--	Rho GDP-dissociation inhibitor 1 GN=GDI1 OS=Arabidopsis thaliana (Mouse-ear cress) PE=1 SV=1	T	Signal transduction mechanisms	Immunoglobulin E-set superfamily protein isoform 1 [Theobroma cacao]	cellular component: cell part (GO:0044464);; cellular component: cell (GO:0005623);; molecular function: enzyme regulator activity (GO:0030234);; biological process: biological regulation (GO:0065007);;
gene14493	47.8949	27.3555	13.3866	LOC107422484	--	--	--	--	--	Vinorine synthase GN=ACT OS=Rauvolfia serpentina (Serpentine wood) PE=1 SV=2	S	Function unknown	PREDICTED: BAHD acyltransferase At5g47980-like isoform X2 [Pyrus x bretschneideri]	--
gene15992	3.41204	0.043926	0	LOC107424048	--	--	--	--	--	Uncharacterized protein At1g76660 GN=At1g76660 OS=Arabidopsis thaliana (Mouse-ear cress) PE=2 SV=1	S	Function unknown	hypothetical protein L484_004326 [Morus notabilis]	--
gene17009	5.86644	2.39221	1.69436	LOC107425234	[V]	Defense mechanisms	Biological Process: drug transmembrane transport (GO:0006855);; Molecular Function: drug transmembrane transporter activity (GO:0015238);; Molecular Function: antiporter activity (GO:0015297);; Cellular Component: membrane (GO:0016020);;	K03327|0|mdm:103446099|protein TRANSPARENT TESTA 12-like; K03327 multidrug resistance protein, MATE family (A)	--	Protein TRANSPARENT TESTA 12 GN=F17J16_80 OS=Arabidopsis thaliana (Mouse-ear cress) PE=2 SV=1	S	Function unknown	PREDICTED: protein TRANSPARENT TESTA 12-like [Malus domestica]	biological process: cellular process (GO:0009987);; biological process: single-organism process (GO:0044699);; biological process: response to stimulus (GO:0050896);; biological process: localization (GO:0051179);; molecular function: transporter activity (GO:0005215);; cellular component: membrane (GO:0016020);;
gene17570	2.33886	0.592956	0.353212	LOC107425803	--	--	--	--	--	--	S	Function unknown	PREDICTED: suppressor protein SRP40 [Prunus mume]	--
gene1887	2.37788	0.731572	0.393642	LOC107427551	--	--	--	--	--	E3 ubiquitin-protein ligase RING1-like GN=At3g19950 OS=Arabidopsis thaliana (Mouse-ear cress) PE=1 SV=1	O	Posttranslational modification, protein turnover, chaperones	PREDICTED: uncharacterized protein LOC101295556 [Fragaria vesca subsp. vesca]	--
gene19474	10.2263	4.61703	2.17716	LOC107427889	[J]	Translation, ribosomal structure and biogenesis	Molecular Function: structural constituent of ribosome (GO:0003735);; Cellular Component: ribosome (GO:0005840);; Biological Process: translation (GO:0006412);;	K02935|2.19358e-92|pper:PRUPE_ppa011350mg|hypothetical protein; K02935 large subunit ribosomal protein L7/L12 (A)	Ribosome (ko03010)	50S ribosomal protein L12, cyanelle OS=Cyanophora paradoxa PE=3 SV=1	J	Translation, ribosomal structure and biogenesis	hypothetical protein PRUPE_ppa011350mg [Prunus persica]	biological process: metabolic process (GO:0008152);; biological process: cellular process (GO:0009987);; molecular function: structural molecule activity (GO:0005198);; cellular component: cell (GO:0005623);; cellular component: cell part (GO:0044464);; cellular component: organelle (GO:0043226);; cellular component: macromolecular complex (GO:0032991);;
gene21569	2.1618	0.644583	0.37586	LOC107430150	--	--	Molecular Function: DNA binding (GO:0003677);; Molecular Function: sequence-specific DNA binding transcription factor activity (GO:0003700);; Cellular Component: nucleus (GO:0005634);; Biological Process: regulation of transcription, DNA-templated (GO:0006355);; Molecular Function: protein dimerization activity (GO:0046983);;	--	--	Agamous-like MADS-box protein AGL19 GN=AGL19 OS=Arabidopsis thaliana (Mouse-ear cress) PE=1 SV=1	K	Transcription	PREDICTED: agamous-like MADS-box protein AGL19 [Populus euphratica]	biological process: biological regulation (GO:0065007);; molecular function: binding (GO:0005488);; molecular function: nucleic acid binding transcription factor activity (GO:0001071);; cellular component: cell part (GO:0044464);; cellular component: cell (GO:0005623);; cellular component: organelle (GO:0043226);;
gene22064	3.70187	0.437142	0.16465	LOC107430696	--	--	Biological Process: nucleic acid metabolic process (GO:0090304);;	--	--	--	S	Function unknown	PREDICTED: uncharacterized protein LOC103338549 isoform X1 [Prunus mume]	biological process: metabolic process (GO:0008152);; biological process: cellular process (GO:0009987);;
gene22594	0.971456	0.437893	0.275604	LOC107431278	--	--	Molecular Function: iron ion transmembrane transporter activity (GO:0005381);; Cellular Component: integral component of membrane (GO:0016021);; Biological Process: iron ion transmembrane transport (GO:0034755);;	K14685|0|pper:PRUPE_ppa004383mg|hypothetical protein; K14685 solute carrier family 40 (iron-regulated transporter), member 1 (A)	--	Solute carrier family 40 member 2 GN=F12E4.370 OS=Arabidopsis thaliana (Mouse-ear cress) PE=2 SV=1	P	Inorganic ion transport and metabolism	PREDICTED: solute carrier family 40 member 2-like [Fragaria vesca subsp. vesca]	cellular component: membrane (GO:0016020);; cellular component: membrane part (GO:0044425);; molecular function: transporter activity (GO:0005215);; biological process: single-organism process (GO:0044699);; biological process: localization (GO:0051179);; biological process: cellular process (GO:0009987);;
gene23662	5.30934	2.60172	1.92183	LOC107432429	--	--	--	--	--	--	S	Function unknown	hypothetical protein L484_025673 [Morus notabilis]	--
gene24520	6.49769	0.31399	0	LOC107433374	--	--	--	--	--	--	S	Function unknown	hypothetical protein PHAVU_009G221600g [Phaseolus vulgaris]	--
gene24609	5.29873	0.0738335	0	LOC107433485	--	--	Biological Process: vesicle-mediated transport (GO:0016192);;	--	--	--	P	Inorganic ion transport and metabolism	Vesicle transport protein GOT1B [Medicago truncatula]	biological process: localization (GO:0051179);;
gene24798	1.98714	0.942987	0.578369	LOC107433731	[R]	General function prediction only	Molecular Function: carboxylic ester hydrolase activity (GO:0004091);; Molecular Function: retinyl-palmitate esterase activity (GO:0050253);; Molecular Function: methyl indole-3-acetate esterase activity (GO:0080030);; Molecular Function: methyl salicylate esterase activity (GO:0080031);; Molecular Function: methyl jasmonate esterase activity (GO:0080032);;	--	--	Probable strigolactone esterase D14 homolog GN=D14 OS=Arabidopsis thaliana (Mouse-ear cress) PE=1 SV=1	R	General function prediction only	PREDICTED: probable strigolactone esterase DAD2 [Vitis vinifera]	molecular function: catalytic activity (GO:0003824);; biological process: metabolic process (GO:0008152);;
gene2646	0.616161	0.225844	0.0693726	LOC107435693	[R]	General function prediction only	--	--	--	Ankyrin repeat-containing protein At3g12360 GN=At3g12360 OS=Arabidopsis thaliana (Mouse-ear cress) PE=2 SV=1	R	General function prediction only	Ankyrin repeat-containing protein [Morus notabilis]	--
gene27592	30.24	14.0637	9.42064	LOC107404003	[MG]	Cell wall/membrane/envelope biogenesis;; Carbohydrate transport and metabolism	Molecular Function: nucleotide binding (GO:0000166);; Molecular Function: pinoresinol reductase activity (GO:0010283);; Molecular Function: 2'-hydroxyisoflavone reductase activity (GO:0047526);; Biological Process: oxidation-reduction process (GO:0055114);;	--	--	Probable pinoresinol-lariciresinol reductase 3 GN=PLR3 OS=Arabidopsis thaliana (Mouse-ear cress) PE=3 SV=2	R	General function prediction only	PREDICTED: probable pinoresinol-lariciresinol reductase 3 [Malus domestica]	molecular function: binding (GO:0005488);; molecular function: catalytic activity (GO:0003824);; biological process: metabolic process (GO:0008152);; biological process: single-organism process (GO:0044699);;
gene28310	2.34972	1.14154	0.763081	LOC107404792	--	--	Biological Process: chromatin silencing (GO:0006342);; Biological Process: cell cycle process (GO:0022402);; Biological Process: histone lysine methylation (GO:0034968);; Biological Process: system development (GO:0048731);;	--	--	--	S	Function unknown	hypothetical protein PRUPE_ppa010712mg [Prunus persica]	biological process: metabolic process (GO:0008152);; biological process: single-organism process (GO:0044699);; biological process: developmental process (GO:0032502);; biological process: cellular component organization or biogenesis (GO:0071840);; biological process: biological regulation (GO:0065007);; biological process: cellular process (GO:0009987);;
gene28581	5.89548	2.39988	1.48788	LOC107405088	--	--	--	--	--	--	S	Function unknown	PREDICTED: uncharacterized protein LOC103943118 isoform X2 [Pyrus x bretschneideri]	--
gene29095	12.8507	0.0284854	0	LOC107405642	--	--	--	--	--	--	R	General function prediction only	hypothetical protein L484_027807 [Morus notabilis]	--
gene29200	3.10227	1.3547	0.775504	LOC107405760	[R]	General function prediction only	Cellular Component: nucleus (GO:0005634);; Biological Process: DNA repair (GO:0006281);; Biological Process: DNA recombination (GO:0006310);;	K11864|0|vvi:100253140|uncharacterized LOC100253140; K11864 BRCA1/BRCA2-containing complex subunit 3 (A)	--	COP9 signalosome complex subunit 5a GN=F3I17.12 OS=Arabidopsis thaliana (Mouse-ear cress) PE=1 SV=1	O	Posttranslational modification, protein turnover, chaperones	PREDICTED: uncharacterized protein LOC100253140 [Vitis vinifera]	biological process: metabolic process (GO:0008152);; biological process: response to stimulus (GO:0050896);; biological process: single-organism process (GO:0044699);; biological process: cellular process (GO:0009987);; cellular component: cell (GO:0005623);; cellular component: cell part (GO:0044464);; cellular component: organelle (GO:0043226);;
gene29300	3.3584	1.36813	0.938293	LOC107405867	--	--	Molecular Function: double-stranded DNA binding (GO:0003690);; Molecular Function: sequence-specific DNA binding transcription factor activity (GO:0003700);; Cellular Component: nucleus (GO:0005634);; Biological Process: mRNA export from nucleus (GO:0006406);; Biological Process: positive regulation of cell proliferation (GO:0008284);; Biological Process: response to abscisic acid (GO:0009737);; …	K16241|1.81083e-82|pmum:103319683|transcription factor HY5; K16241 transcription factor HY5 (A)	Circadian rhythm - plant (ko04712)	Transcription factor HY5 GN=F2I11_150 OS=Arabidopsis thaliana (Mouse-ear cress) PE=1 SV=1	K	Transcription	PREDICTED: transcription factor HY5 [Prunus mume]	biological process: multicellular organismal process (GO:0032501);; biological process: biological regulation (GO:0065007);; biological process: response to stimulus (GO:0050896);; biological process: developmental process (GO:0032502);; biological process: cellular component organization or biogenesis (GO:0071840);; biological process: cellular process (GO:0009987);; biological process: signalin…
gene3233	77.9107	37.372	28.2829	LOC107409663	[R]	General function prediction only	--	K13035|0|cic:CICLE_v10028755mg|hypothetical protein; K13035 beta-cyano-L-alanine hydratase/nitrilase [EC:3.5.5.4 4.2.1.65] (A)	Cyanoamino acid metabolism (ko00460)	Bifunctional nitrilase/nitrile hydratase NIT4A GN=NIT4A OS=Nicotiana tabacum (Common tobacco) PE=2 SV=1	E	Amino acid transport and metabolism	Bifunctional nitrilase/nitrile hydratase NIT4A [Morus notabilis]	--
gene33038	5.53595	2.5908	1.6219	LOC107409911	--	--	--	--	--	Mechanosensitive ion channel protein 10 GN=MSL10 OS=Arabidopsis thaliana (Mouse-ear cress) PE=1 SV=1	S	Function unknown	Mechanosensitive ion channel protein 10 [Morus notabilis]	--
gene3421	0.575618	0.0150127	0	LOC107410399	[S]	Function unknown	--	--	--	Probable LRR receptor-like serine/threonine-protein kinase At4g08850 (Precursor) GN=At4g08850 OS=Arabidopsis thaliana (Mouse-ear cress) PE=2 SV=3	T	Signal transduction mechanisms	PREDICTED: probable leucine-rich repeat receptor-like protein kinase At1g35710 [Vitis vinifera]	--
gene3580	1.69502	0.870862	0.53137	LOC107410591	--	--	--	--	--	Putative DNA-binding protein ESCAROLA GN=ESC OS=Arabidopsis thaliana (Mouse-ear cress) PE=2 SV=1	S	Function unknown	PREDICTED: uncharacterized protein LOC105110957 [Populus euphratica]	--
gene3715	5.48345	2.77779	1.64894	LOC107410725	--	--	--	--	--	--	--	--	--	--
gene3930	128.831	62.4162	46.7715	LOC107410942	[O]	Posttranslational modification, protein turnover, chaperones	Cellular Component: cytoplasm (GO:0005737);; Biological Process: response to stress (GO:0006950);;	K13993|4.38183e-78|cam:101505773|18.5 kDa class I heat shock protein-like; K13993 HSP20 family protein (A)	Protein processing in endoplasmic reticulum (ko04141)	18.5 kDa class I heat shock protein GN=HSP18.5-C OS=Glycine max (Soybean) PE=3 SV=1	O	Posttranslational modification, protein turnover, chaperones	PREDICTED: 18.5 kDa class I heat shock protein-like [Cicer arietinum]	cellular component: cell (GO:0005623);; cellular component: cell part (GO:0044464);; biological process: response to stimulus (GO:0050896);;
gene3936	91.5142	36.6302	22.7399	LOC107410934	[O]	Posttranslational modification, protein turnover, chaperones	Cellular Component: cytoplasm (GO:0005737);; Biological Process: response to stress (GO:0006950);;	K13993|1.33676e-85|cam:101505773|18.5 kDa class I heat shock protein-like; K13993 HSP20 family protein (A)	Protein processing in endoplasmic reticulum (ko04141)	18.5 kDa class I heat shock protein GN=HSP18.5-C OS=Glycine max (Soybean) PE=3 SV=1	O	Posttranslational modification, protein turnover, chaperones	PREDICTED: 18.5 kDa class I heat shock protein-like [Cicer arietinum]	biological process: response to stimulus (GO:0050896);; cellular component: cell part (GO:0044464);; cellular component: cell (GO:0005623);;
gene4768	117.412	55.4049	38.1026	LOC107411830	--	--	--	--	--	F-box protein PP2-B15 GN=PP2B15 OS=Arabidopsis thaliana (Mouse-ear cress) PE=2 SV=2	R	General function prediction only	F-box protein [Morus notabilis]	--
gene4909	0.858199	0.201142	0.0903142	LOC107412015	--	--	--	--	--	--	S	Function unknown	hypothetical protein PRUPE_ppa023477mg [Prunus persica]	--
gene6025	21.6454	11.1041	8.11005	LOC107413212	[MJ]	Cell wall/membrane/envelope biogenesis;; Translation, ribosomal structure and biogenesis	Molecular Function: mannose-1-phosphate guanylyltransferase activity (GO:0004475);; Molecular Function: mannose-1-phosphate guanylyltransferase (GDP) activity (GO:0008928);; Biological Process: biosynthetic process (GO:0009058);;	K00966|0|vvi:100233006|mannose-1-phosphate guanylyltransferase 1; K00966 mannose-1-phosphate guanylyltransferase [EC:2.7.7.13] (A)	Fructose and mannose metabolism (ko00051);; Amino sugar and nucleotide sugar metabolism (ko00520)	Mannose-1-phosphate guanylyltransferase 1 GN=At2g39770 OS=Arabidopsis thaliana (Mouse-ear cress) PE=1 SV=1	M	Cell wall/membrane/envelope biogenesis	GDP-D-mannose pyrophosphorylase [Ziziphus jujuba]	molecular function: catalytic activity (GO:0003824);; biological process: metabolic process (GO:0008152);;
gene6747	232.068	107.659	73.3678	LOC107414006	--	--	Cellular Component: extracellular region (GO:0005576);; Biological Process: syncytium formation (GO:0006949);; Biological Process: plant-type cell wall organization (GO:0009664);; Cellular Component: membrane (GO:0016020);;	--	--	Expansin-A8 (Precursor) GN=T2P4.4 OS=Arabidopsis thaliana (Mouse-ear cress) PE=2 SV=1	R	General function prediction only	expansin 2 [Ziziphus jujuba]	cellular component: extracellular region (GO:0005576);; cellular component: membrane (GO:0016020);; biological process: single-organism process (GO:0044699);; biological process: developmental process (GO:0032502);; biological process: cellular component organization or biogenesis (GO:0071840);; biological process: cellular process (GO:0009987);;
gene7050	18.0404	6.55697	3.49396	LOC107414336	--	--	--	--	--	21 kDa protein (Precursor) OS=Daucus carota (Wild carrot) PE=2 SV=1	R	General function prediction only	21 kDa protein [Morus notabilis]	--
gene7055	7.61462	2.80486	1.7119	LOC107414311	--	--	--	--	--	21 kDa protein (Precursor) OS=Daucus carota (Wild carrot) PE=2 SV=1	R	General function prediction only	PREDICTED: 21 kDa protein-like [Fragaria vesca subsp. vesca]	--
gene8309	1.60776	0.408177	0.24663	LOC107415719	--	--	--	--	--	--	S	Function unknown	NC domain-containing family protein [Populus trichocarpa]	--
gene9281	4.96349	1.39327	0.488135	LOC107416782	--	--	--	--	--	7-deoxyloganetin glucosyltransferase GN=UGT85A24 OS=Gardenia jasminoides (Cape jasmine) PE=1 SV=1	G	Carbohydrate transport and metabolism	PREDICTED: UDP-glycosyltransferase 85A2-like [Prunus mume]	--
gene9699	33.7931	10.213	5.85741	LOC107417234	--	--	Molecular Function: protein dimerization activity (GO:0046983);;	--	--	Transcription factor bHLH30 OS=Arabidopsis thaliana (Mouse-ear cress) PE=1 SV=1	K	Transcription	hypothetical protein POPTR_0019s11870g [Populus trichocarpa]	molecular function: binding (GO:0005488);;
jujube_newGene_1205	2.21546	1.56109	0.688906	--	--	--	--	--	--	Putative disease resistance protein RGA3 GN=RGA3 OS=Solanum bulbocastanum (Wild potato) PE=2 SV=2	T	Signal transduction mechanisms	PREDICTED: disease resistance protein RGA2-like [Pyrus x bretschneideri]	--
jujube_newGene_2083	5.00139	2.11181	1.12273	--	--	--	--	--	--	--	--	--	T-complex protein 1 subunit delta [Medicago truncatula]	--
jujube_newGene_3151	1.33407	0.00978594	0	--	--	--	--	--	--	--	S	Function unknown	PREDICTED: uncharacterized protein LOC102625722 [Citrus sinensis]	--
jujube_newGene_561	0.870598	0.337863	0.209943	--	--	--	--	--	--	--	--	--	--	--
jujube_newGene_71	3.53267	0.010987	0	--	--	--	Molecular Function: phospholipid binding (GO:0005543);; Cellular Component: plastid (GO:0009536);;	--	--	Oxysterol-binding protein-related protein 1C GN=ORP1C OS=Arabidopsis thaliana (Mouse-ear cress) PE=2 SV=1	T	Signal transduction mechanisms	PREDICTED: oxysterol-binding protein-related protein 1C isoform X1 [Pyrus x bretschneideri]	cellular component: organelle (GO:0043226);; cellular component: cell (GO:0005623);; cellular component: cell part (GO:0044464);; molecular function: binding (GO:0005488);;
jujube_newGene_779	47.1581	21.5344	14.9558	--	[R]	General function prediction only	Molecular Function: zinc ion binding (GO:0008270);; Molecular Function: oxidoreductase activity (GO:0016491);; Cellular Component: intracellular part (GO:0044424);; Biological Process: response to stimulus (GO:0050896);; Biological Process: oxidation-reduction process (GO:0055114);;	K07119|1.4005e-53|pper:PRUPE_ppa008058mg|hypothetical protein; K07119 (A)	--	2-alkenal reductase (NADP(+)-dependent) GN=DBR OS=Nicotiana tabacum (Common tobacco) PE=1 SV=1	R	General function prediction only	hypothetical protein PRUPE_ppa008058mg [Prunus persica]	molecular function: binding (GO:0005488);; molecular function: catalytic activity (GO:0003824);; biological process: metabolic process (GO:0008152);; biological process: single-organism process (GO:0044699);; biological process: response to stimulus (GO:0050896);; cellular component: cell (GO:0005623);; cellular component: cell part (GO:0044464);;
jujube_newGene_796	84.3067	39.6371	29.1846	--	[Q]	Secondary metabolites biosynthesis, transport and catabolism	Molecular Function: monooxygenase activity (GO:0004497);; Molecular Function: iron ion binding (GO:0005506);; Molecular Function: electron carrier activity (GO:0009055);; Molecular Function: oxidoreductase activity, acting on paired donors, with incorporation or reduction of molecular oxygen (GO:0016705);; Molecular Function: heme binding (GO:0020037);; Biological Process: oxidation-reduction pro…	K12640|1.05284e-38|cmo:103495886|cytochrome P450 85A-like; K12640 brassinosteroid-6-oxidase 2 [EC:1.14.-.-] (A)	Brassinosteroid biosynthesis (ko00905)	Cytochrome P450 85A GN=BA13 OS=Phaseolus vulgaris (Kidney bean) PE=3 SV=2	Q	Secondary metabolites biosynthesis, transport and catabolism	PREDICTED: cytochrome P450 85A-like [Cucumis melo]	biological process: single-organism process (GO:0044699);; biological process: metabolic process (GO:0008152);; molecular function: electron carrier activity (GO:0009055);; molecular function: binding (GO:0005488);; molecular function: catalytic activity (GO:0003824);;
jujube_newGene_81	2.64799	1.30579	0.815599	--	--	--	--	--	--	F-box protein At2g17036 GN=At2g17036 OS=Arabidopsis thaliana (Mouse-ear cress) PE=2 SV=1	R	General function prediction only	hypothetical protein VITISV_028369 [Vitis vinifera]	--
Profile 1
gene10009	13.7845	6.15419	4.98809	LOC107417602	--	--	Biological Process: carbohydrate metabolic process (GO:0005975);; Cellular Component: plasmodesma (GO:0009506);; Molecular Function: glucan endo-1,3-beta-D-glucosidase activity (GO:0042973);; Molecular Function: cation binding (GO:0043169);; Cellular Component: anchored component of plasma membrane (GO:0046658);;	--	--	Glucan endo-1,3-beta-glucosidase 6 (Precursor) GN=At5g58090 OS=Arabidopsis thaliana (Mouse-ear cress) PE=1 SV=2	R	General function prediction only	PREDICTED: glucan endo-1,3-beta-glucosidase 6 [Prunus mume]	biological process: metabolic process (GO:0008152);; molecular function: catalytic activity (GO:0003824);; molecular function: binding (GO:0005488);; cellular component: cell (GO:0005623);; cellular component: cell part (GO:0044464);; cellular component: membrane (GO:0016020);; cellular component: membrane part (GO:0044425);; cellular component: cell junction (GO:0030054);;
gene10012	15.9288	7.12396	7.39291	LOC107417660	[G]	Carbohydrate transport and metabolism	Molecular Function: starch synthase activity (GO:0009011);; Biological Process: glucan biosynthetic process (GO:0009250);;	K00703|0|pmum:103329564|probable starch synthase 4, chloroplastic/amyloplastic; K00703 starch synthase [EC:2.4.1.21] (A)	Starch and sucrose metabolism (ko00500)	Probable starch synthase 4, chloroplastic/amyloplastic (Precursor) GN=SS4 OS=Arabidopsis thaliana (Mouse-ear cress) PE=2 SV=1	M	Cell wall/membrane/envelope biogenesis	PREDICTED: probable starch synthase 4, chloroplastic/amyloplastic isoform X2 [Prunus mume]	molecular function: catalytic activity (GO:0003824);; biological process: metabolic process (GO:0008152);; biological process: single-organism process (GO:0044699);; biological process: cellular process (GO:0009987);;
gene10027	6.6457	3.27307	3.59061	LOC107417571	[I]	Lipid transport and metabolism	Cellular Component: vacuole (GO:0005773);; Biological Process: unsaturated fatty acid biosynthetic process (GO:0006636);; Biological Process: phosphatidylglycerol biosynthetic process (GO:0006655);; Biological Process: pollen development (GO:0009555);; Biological Process: thylakoid membrane organization (GO:0010027);; Biological Process: tetracyclic triterpenoid biosynthetic process (GO:0010686);…	K01853|0|pper:PRUPE_ppa001844mg|hypothetical protein; K01853 cycloartenol synthase [EC:5.4.99.8] (A)	Steroid biosynthesis (ko00100)	Cycloartenol synthase 2 GN=CASBPX2 OS=Betula platyphylla (Asian white birch) PE=1 SV=1	I	Lipid transport and metabolism	RecName: Full=Cycloartenol synthase 2 [Betula platyphylla]	cellular component: membrane part (GO:0044425);; cellular component: organelle (GO:0043226);; cellular component: cell (GO:0005623);; cellular component: cell part (GO:0044464);; cellular component: membrane (GO:0016020);; molecular function: catalytic activity (GO:0003824);; biological process: single-organism process (GO:0044699);; biological process: metabolic process (GO:0008152);; biological…
gene10129	3.94386	1.2203	1.19324	LOC107417709	[S]	Function unknown	Biological Process: metabolic process (GO:0008152);; Molecular Function: oxidoreductase activity (GO:0016491);;	--	--	LRR receptor-like serine/threonine-protein kinase FLS2 (Precursor) GN=FLS2 OS=Arabidopsis thaliana (Mouse-ear cress) PE=1 SV=1	R	General function prediction only	PREDICTED: LRR receptor-like serine/threonine-protein kinase GSO2 [Prunus mume]	molecular function: catalytic activity (GO:0003824);; biological process: metabolic process (GO:0008152);;
gene10189	25.1379	1.61415	2.71778	LOC107417794	--	--	--	--	--	Protein trichome birefringence-like 38 GN=TBL38 OS=Arabidopsis thaliana (Mouse-ear cress) PE=2 SV=1	R	General function prediction only	hypothetical protein L484_008607 [Morus notabilis]	--
gene10373	2.60584	0.172992	0.100212	LOC107417971	--	--	--	--	--	--	S	Function unknown	hypothetical protein JCGZ_22655 [Jatropha curcas]	--
gene1039	1.48982	0.363787	0.347176	LOC107418241	--	--	--	--	--	F-box protein At2g26160 GN=At2g26160 OS=Arabidopsis thaliana (Mouse-ear cress) PE=2 SV=1	R	General function prediction only	PREDICTED: F-box protein SKIP23-like [Vitis vinifera]	--
gene10397	3.09454	0.537828	1.10871	LOC107418018	--	--	Molecular Function: sequence-specific DNA binding transcription factor activity (GO:0003700);; Biological Process: response to ethylene (GO:0009723);; Biological Process: cellular response to phosphate starvation (GO:0016036);; Biological Process: galactolipid biosynthetic process (GO:0019375);; Biological Process: regulation of response to nutrient levels (GO:0032107);; Biological Process: cellu…	--	--	Probable WRKY transcription factor 75 GN=WRKY75 OS=Arabidopsis thaliana (Mouse-ear cress) PE=2 SV=1	K	Transcription	WRKY-type DNA binding protein 1 [Theobroma cacao]	molecular function: nucleic acid binding transcription factor activity (GO:0001071);; molecular function: binding (GO:0005488);; biological process: single-organism process (GO:0044699);; biological process: response to stimulus (GO:0050896);; biological process: metabolic process (GO:0008152);; biological process: multicellular organismal process (GO:0032501);; biological process: cellular proce…
gene1042	8.93949	4.23911	4.59033	LOC107418223	--	--	Cellular Component: ubiquitin ligase complex (GO:0000151);; Molecular Function: ubiquitin-protein transferase activity (GO:0004842);; Biological Process: protein ubiquitination (GO:0016567);;	--	--	U-box domain-containing protein 11 GN=PUB11 OS=Arabidopsis thaliana (Mouse-ear cress) PE=2 SV=2	S	Function unknown	U-box domain-containing protein 11 [Morus notabilis]	molecular function: catalytic activity (GO:0003824);; biological process: metabolic process (GO:0008152);; biological process: cellular process (GO:0009987);; cellular component: cell part (GO:0044464);; cellular component: cell (GO:0005623);; cellular component: macromolecular complex (GO:0032991);;
gene10422	15.2491	6.23018	8.16763	LOC107418009	--	--	--	--	--	Protein FAR1-RELATED SEQUENCE 3 GN=FRS3 OS=Arabidopsis thaliana (Mouse-ear cress) PE=2 SV=2	S	Function unknown	COMM domain-containing protein, putative [Ricinus communis]	--
gene10496	214.938	71.5915	83.6811	LOC107418105	--	--	Molecular Function: protein dimerization activity (GO:0046983);;	--	--	Transcription factor bHLH137 GN=K3K7 OS=Arabidopsis thaliana (Mouse-ear cress) PE=2 SV=1	K	Transcription	Basic helix-loop-helix DNA-binding superfamily protein, putative isoform 1 [Theobroma cacao]	molecular function: binding (GO:0005488);;
gene10501	1.22917	0.0347397	0.0958623	LOC107418099	--	--	--	K12617|0|pmum:103325680|protein PAT1 homolog 1; K12617 DNA topoisomerase 2-associated protein PAT1 (A)	RNA degradation (ko03018)	--	S	Function unknown	hypothetical protein L484_002129 [Morus notabilis]	--
gene10513	13.1774	6.26513	6.67908	LOC107418201	[IQ]	Lipid transport and metabolism;; Secondary metabolites biosynthesis, transport and catabolism	Molecular Function: ligase activity (GO:0016874);; Molecular Function: Photinus-luciferin 4-monooxygenase (ATP-hydrolyzing) activity (GO:0047077);; Biological Process: oxidation-reduction process (GO:0055114);;	--	--	4-coumarate--CoA ligase-like 9 GN=4CLL9 OS=Arabidopsis thaliana (Mouse-ear cress) PE=1 SV=2	I	Lipid transport and metabolism	PREDICTED: 4-coumarate--CoA ligase-like 9 [Malus domestica]	molecular function: catalytic activity (GO:0003824);; biological process: metabolic process (GO:0008152);; biological process: single-organism process (GO:0044699);;
gene10601	0.731265	0	0	LOC107418219	--	--	--	--	--	--	S	Function unknown	hypothetical protein L484_018946 [Morus notabilis]	--
gene10733	21.0784	9.43414	10.2638	LOC107418364	--	--	Molecular Function: metal ion binding (GO:0046872);;	--	--	Probable BOI-related E3 ubiquitin-protein ligase 2 GN=BRG2 OS=Arabidopsis thaliana (Mouse-ear cress) PE=1 SV=1	O	Posttranslational modification, protein turnover, chaperones	Baculoviral IAP repeat-containing protein 3 [Morus notabilis]	molecular function: binding (GO:0005488);;
gene10782	0.930271	0.364583	0.474095	LOC107418427	--	--	--	--	--	Probable apyrase 7 GN=APY7 OS=Arabidopsis thaliana (Mouse-ear cress) PE=2 SV=1	F	Nucleotide transport and metabolism	Nucleoside-diphosphatase mig-23 [Morus notabilis]	--
gene10854	1.88954	0.129607	0.135268	LOC107418494	[GEPR]	Carbohydrate transport and metabolism;; Amino acid transport and metabolism;; Inorganic ion transport and metabolism;; General function prediction only	--	--	--	--	R	General function prediction only	PREDICTED: probable transporter MCH1 [Prunus mume]	--
gene10898	0.585632	0.28765	0.288348	LOC107418541	--	--	Cellular Component: cytoplasm (GO:0005737);; Biological Process: gravitropism (GO:0009630);; Biological Process: flower development (GO:0009908);; Cellular Component: basal plasma membrane (GO:0009925);; Biological Process: auxin polar transport (GO:0009926);; Biological Process: xylem and phloem pattern formation (GO:0010051);; Biological Process: inflorescence development (GO:0010229);; Biologi…	K13947|0|tcc:TCM_012854|Auxin efflux facilitator isoform 1; K13947 auxin efflux carrier family (A)	--	Auxin efflux carrier component 1 OS=Oryza sativa subsp. japonica (Rice) PE=2 SV=1	P	Inorganic ion transport and metabolism	Auxin efflux facilitator isoform 1 [Theobroma cacao]	cellular component: membrane part (GO:0044425);; cellular component: cell part (GO:0044464);; cellular component: cell (GO:0005623);; cellular component: membrane (GO:0016020);; biological process: biological regulation (GO:0065007);; biological process: multicellular organismal process (GO:0032501);; biological process: response to stimulus (GO:0050896);; biological process: developmental proces…
gene11158	4.23064	0.471054	0.835738	LOC107418826	[Q]	Secondary metabolites biosynthesis, transport and catabolism	Molecular Function: oxidoreductase activity (GO:0016491);; Molecular Function: metal ion binding (GO:0046872);;	--	--	Cytochrome P450 CYP736A12 OS=Panax ginseng (Korean ginseng) PE=2 SV=1	Q	Secondary metabolites biosynthesis, transport and catabolism	Cytochrome P450 71A1 [Morus notabilis]	biological process: metabolic process (GO:0008152);; molecular function: catalytic activity (GO:0003824);; molecular function: binding (GO:0005488);;
gene11863	6.52089	2.95101	4.09487	LOC107419619	[RTKL]	General function prediction only;; Signal transduction mechanisms;; Transcription;; Replication, recombination and repair	--	--	--	Probable leucine-rich repeat receptor-like protein kinase At1g68400 (Precursor) GN=At1g68400 OS=Arabidopsis thaliana (Mouse-ear cress) PE=2 SV=1	T	Signal transduction mechanisms	PREDICTED: probable leucine-rich repeat receptor-like protein kinase At1g68400 [Vitis vinifera]	--
gene11976	6.35935	2.27076	2.13687	LOC107419738	[K]	Transcription	Molecular Function: nucleotide binding (GO:0000166);; Biological Process: RNA splicing, via endonucleolytic cleavage and ligation (GO:0000394);; Molecular Function: DNA-directed RNA polymerase activity (GO:0003899);; Cellular Component: DNA-directed RNA polymerase II, core complex (GO:0005665);; Biological Process: transcription from RNA polymerase II promoter (GO:0006366);;	K03012|1.55357e-76|pxb:103950539|DNA-directed RNA polymerase II subunit 4-like; K03012 DNA-directed RNA polymerase II subunit RPB4 (A)	Purine metabolism (ko00230);; Pyrimidine metabolism (ko00240);; RNA polymerase (ko03020)	DNA-directed RNA polymerase II subunit 4 GN=MYH9.13 OS=Arabidopsis thaliana (Mouse-ear cress) PE=1 SV=1	K	Transcription	PREDICTED: DNA-directed RNA polymerase II subunit 4-like [Malus domestica]	biological process: metabolic process (GO:0008152);; biological process: cellular process (GO:0009987);; molecular function: binding (GO:0005488);; molecular function: catalytic activity (GO:0003824);; cellular component: macromolecular complex (GO:0032991);; cellular component: membrane-enclosed lumen (GO:0031974);; cellular component: organelle part (GO:0044422);; cellular component: organelle …
gene12102	4.08567	1.99569	1.9419	LOC107419943	--	--	--	--	--	Protein ASPARTIC PROTEASE IN GUARD CELL 2 (Precursor) GN=ASPG2 OS=Arabidopsis thaliana (Mouse-ear cress) PE=2 SV=1	O	Posttranslational modification, protein turnover, chaperones	PREDICTED: protein ASPARTIC PROTEASE IN GUARD CELL 2-like isoform X1 [Prunus mume]	--
gene12153	91.4146	16.1365	32.333	LOC107419922	--	--	--	--	--	Snakin-2 (Precursor) GN=SN2 OS=Solanum tuberosum (Potato) PE=1 SV=1	R	General function prediction only	hypothetical protein L484_027833 [Morus notabilis]	--
gene12359	22.0387	2.49163	2.86093	LOC107420085	--	--	Biological Process: metabolic process (GO:0008152);; Molecular Function: phosphatase activity (GO:0016791);;	K13248|8.53245e-118|vvi:100247400|inorganic pyrophosphatase 3; K13248 pyridoxal phosphate phosphatase PHOSPHO2 [EC:3.1.3.74] (A)	Vitamin B6 metabolism (ko00750)	Inorganic pyrophosphatase 1 GN=PS2 OS=Arabidopsis thaliana (Mouse-ear cress) PE=1 SV=1	R	General function prediction only	Inorganic pyrophosphatase 2 [Morus notabilis]	molecular function: catalytic activity (GO:0003824);; biological process: metabolic process (GO:0008152);;
gene12711	2.38349	1.03679	1.37001	LOC107420537	--	--	Cellular Component: nucleus (GO:0005634);;	K11339|1.08194e-136|pmum:103320383|nuA4 complex subunit EAF3 homolog; K11339 mortality factor 4-like protein 1 (A)	--	--	BK	Chromatin structure and dynamics;; Transcription	PREDICTED: nuA4 complex subunit EAF3 homolog [Prunus mume]	cellular component: cell part (GO:0044464);; cellular component: cell (GO:0005623);; cellular component: organelle (GO:0043226);;
gene12817	18.9958	7.25374	6.07771	LOC107420641	[O]	Posttranslational modification, protein turnover, chaperones	--	--	--	Putative RING-H2 finger protein ATL12 (Precursor) GN=ATL12 OS=Arabidopsis thaliana (Mouse-ear cress) PE=3 SV=1	O	Posttranslational modification, protein turnover, chaperones	PREDICTED: E3 ubiquitin-protein ligase ATL42-like [Citrus sinensis]	--
gene12819	3.62742	1.89283	1.55927	LOC107420666	[G]	Carbohydrate transport and metabolism	Biological Process: water transport (GO:0006833);; Cellular Component: plant-type vacuole membrane (GO:0009705);; Biological Process: cytokinin-activated signaling pathway (GO:0009736);; Molecular Function: water channel activity (GO:0015250);; Cellular Component: integral component of membrane (GO:0016021);; Cellular Component: central vacuole (GO:0042807);; Biological Process: transmembrane tra…	K09873|8.8992e-130|rcu:RCOM_0801990|tonoplast intrinsic protein, putative; K09873 aquaporin TIP (A)	--	Aquaporin TIP4-1, N-terminally processed GN=TIP4-1 OS=Arabidopsis thaliana (Mouse-ear cress) PE=2 SV=1	G	Carbohydrate transport and metabolism	tonoplast intrinsic protein, putative [Ricinus communis]	cellular component: organelle (GO:0043226);; cellular component: cell part (GO:0044464);; cellular component: cell (GO:0005623);; cellular component: organelle part (GO:0044422);; cellular component: membrane (GO:0016020);; cellular component: membrane part (GO:0044425);; biological process: cellular process (GO:0009987);; biological process: biological regulation (GO:0065007);; biological proces…
gene12831	11.992	5.74891	7.98988	LOC107420699	[E]	Amino acid transport and metabolism	Biological Process: transport (GO:0006810);; Cellular Component: membrane (GO:0016020);;	K14638|0|tcc:TCM_037174|Major facilitator superfamily protein; K14638 solute carrier family 15 (peptide/histidine transporter), member 3/4 (A)	--	Protein NRT1/ PTR FAMILY 1.2 GN=F9I5.4 OS=Arabidopsis thaliana (Mouse-ear cress) PE=1 SV=1	E	Amino acid transport and metabolism	Major facilitator superfamily protein [Theobroma cacao]	cellular component: membrane (GO:0016020);; biological process: localization (GO:0051179);;
gene12965	8.33076	1.49457	1.67902	LOC107420792	--	--	Molecular Function: peroxidase activity (GO:0004601);; Biological Process: response to oxidative stress (GO:0006979);; Molecular Function: heme binding (GO:0020037);; Molecular Function: metal ion binding (GO:0046872);; Biological Process: oxidation-reduction process (GO:0055114);;	K00430|2.1818e-180|tcc:TCM_036816|Peroxidase superfamily protein; K00430 peroxidase [EC:1.11.1.7] (A)	Phenylalanine metabolism (ko00360);; Phenylpropanoid biosynthesis (ko00940)	Peroxidase 45 (Precursor) GN=F9N11.20 OS=Arabidopsis thaliana (Mouse-ear cress) PE=1 SV=1	S	Function unknown	Peroxidase superfamily protein [Theobroma cacao]	biological process: metabolic process (GO:0008152);; biological process: response to stimulus (GO:0050896);; biological process: single-organism process (GO:0044699);; molecular function: binding (GO:0005488);; molecular function: catalytic activity (GO:0003824);; molecular function: antioxidant activity (GO:0016209);;
gene13348	0.776896	0.0616949	0.0574821	LOC107421234	--	--	Cellular Component: plant-type cell wall (GO:0009505);; Biological Process: response to karrikin (GO:0080167);;	--	--	--	R	General function prediction only	hypothetical protein PRUPE_ppa007452mg [Prunus persica]	biological process: response to stimulus (GO:0050896);; cellular component: cell (GO:0005623);; cellular component: cell part (GO:0044464);;
gene13351	9.06604	2.90492	2.89257	LOC107421219	[R]	General function prediction only	Molecular Function: voltage-gated potassium channel activity (GO:0005249);; Biological Process: potassium ion transport (GO:0006813);; Cellular Component: integral component of membrane (GO:0016021);; Biological Process: transmembrane transport (GO:0055085);;	--	--	Potassium channel AKT1 GN=AKT1 OS=Arabidopsis thaliana (Mouse-ear cress) PE=1 SV=2	P	Inorganic ion transport and metabolism	hypothetical protein PRUPE_ppa019987mg [Prunus persica]	cellular component: membrane (GO:0016020);; cellular component: membrane part (GO:0044425);; molecular function: transporter activity (GO:0005215);; biological process: localization (GO:0051179);; biological process: single-organism process (GO:0044699);; biological process: biological regulation (GO:0065007);; biological process: cellular process (GO:0009987);;
gene13375	41.6337	12.0874	14.8458	LOC107421262	[V]	Defense mechanisms	Molecular Function: ATP binding (GO:0005524);; Biological Process: ATP catabolic process (GO:0006200);; Molecular Function: organic phosphonate transmembrane-transporting ATPase activity (GO:0015416);; Molecular Function: polyamine-transporting ATPase activity (GO:0015417);; Cellular Component: membrane (GO:0016020);;	--	--	Pleiotropic drug resistance protein 1 GN=PDR1 OS=Nicotiana tabacum (Common tobacco) PE=2 SV=1	Q	Secondary metabolites biosynthesis, transport and catabolism	PREDICTED: pleiotropic drug resistance protein 1-like isoform X1 [Prunus mume]	cellular component: membrane (GO:0016020);; molecular function: binding (GO:0005488);; molecular function: catalytic activity (GO:0003824);; molecular function: transporter activity (GO:0005215);; biological process: localization (GO:0051179);; biological process: metabolic process (GO:0008152);; biological process: single-organism process (GO:0044699);; biological process: cellular process (GO:0…
gene13415	5.3931	1.71867	1.83251	LOC107421302	--	--	--	--	--	--	S	Function unknown	PREDICTED: protein DOS2 [Prunus mume]	--
gene13420	1.55431	0.0908982	0.119581	LOC107421305	--	--	--	--	--	Molybdate transporter 1 GN=F3N11.13 OS=Arabidopsis thaliana (Mouse-ear cress) PE=1 SV=1	P	Inorganic ion transport and metabolism	hypothetical protein PRUPE_ppa020306mg [Prunus persica]	--
gene13428	1.26391	0.592074	0.814908	LOC107421315	--	--	--	--	--	Pentatricopeptide repeat-containing protein At1g71490 GN=PCMP-E67 OS=Arabidopsis thaliana (Mouse-ear cress) PE=2 SV=1	R	General function prediction only	PREDICTED: pentatricopeptide repeat-containing protein At1g71490-like [Prunus mume]	--
gene13436	6.55083	2.80944	2.7484	LOC107421326	--	--	--	K14765|9.35845e-162|pmum:103319465|neuroguidin; K14765 U3 small nucleolar ribonucleoprotein protein LCP5 (A)	--	--	A	RNA processing and modification	PREDICTED: neuroguidin [Prunus mume]	--
gene13536	43.4364	18.8699	19.9185	LOC107421433	[U]	Intracellular trafficking, secretion, and vesicular transport	Biological Process: SRP-dependent cotranslational protein targeting to membrane (GO:0006614);; Molecular Function: 7S RNA binding (GO:0008312);; Cellular Component: signal recognition particle (GO:0048500);;	K03105|4.21224e-73|vvi:100264739|signal recognition particle 19 kDa protein; K03105 signal recognition particle subunit SRP19 (A)	Protein export (ko03060)	Signal recognition particle 19 kDa protein GN=SRP19 OS=Arabidopsis thaliana (Mouse-ear cress) PE=1 SV=1	U	Intracellular trafficking, secretion, and vesicular transport	PREDICTED: signal recognition particle 19 kDa protein-like [Vitis vinifera]	molecular function: binding (GO:0005488);; biological process: cellular component organization or biogenesis (GO:0071840);; biological process: single-organism process (GO:0044699);; biological process: localization (GO:0051179);; cellular component: cell (GO:0005623);; cellular component: cell part (GO:0044464);; cellular component: macromolecular complex (GO:0032991);;
gene13676	3.01797	0.10247	0.495515	LOC107421584	--	--	Biological Process: metabolic process (GO:0008152);; Molecular Function: pyridoxal phosphate binding (GO:0030170);; Molecular Function: alliin lyase activity (GO:0047654);;	--	--	Tryptophan aminotransferase-related protein 4 OS=Arabidopsis thaliana (Mouse-ear cress) PE=2 SV=2	R	General function prediction only	PREDICTED: tryptophan aminotransferase-related protein 4-like [Prunus mume]	biological process: metabolic process (GO:0008152);; molecular function: catalytic activity (GO:0003824);; molecular function: binding (GO:0005488);;
gene13823	31.5954	2.30448	3.29476	LOC107421752	--	--	Biological Process: regulation of cyclin-dependent protein serine/threonine kinase activity (GO:0000079);; Molecular Function: kinase activity (GO:0016301);; Molecular Function: protein kinase binding (GO:0019901);;	--	--	Cyclin-U4-1 GN=CYCU4-1 OS=Arabidopsis thaliana (Mouse-ear cress) PE=1 SV=1	R	General function prediction only	hypothetical protein JCGZ_14652 [Jatropha curcas]	molecular function: catalytic activity (GO:0003824);; molecular function: binding (GO:0005488);; biological process: metabolic process (GO:0008152);; biological process: biological regulation (GO:0065007);;
gene13826	3.18921	1.25	1.3773	LOC107421765	--	--	--	--	--	Pentatricopeptide repeat-containing protein At1g71460, chloroplastic (Precursor) GN=PCMP-A3 OS=Arabidopsis thaliana (Mouse-ear cress) PE=2 SV=1	R	General function prediction only	PREDICTED: pentatricopeptide repeat-containing protein At1g71460, chloroplastic [Prunus mume]	--
gene13827	2.83072	1.13244	1.43864	LOC107421740	--	--	--	--	--	Probable WRKY transcription factor 12 GN=WRKY12 OS=Arabidopsis thaliana (Mouse-ear cress) PE=2 SV=1	K	Transcription	putative WRKY transcription factor 12 [Morus notabilis]	--
gene13847	2.41866	1.06449	1.12337	LOC107421775	--	--	--	--	--	WAT1-related protein At1g25270 GN=At1g25270 OS=Arabidopsis thaliana (Mouse-ear cress) PE=2 SV=1	S	Function unknown	PREDICTED: WAT1-related protein At1g68170, partial [Nelumbo nucifera]	--
gene13959	2.15377	0.298512	0.603369	LOC107421910	--	--	Molecular Function: aspartic-type endopeptidase activity (GO:0004190);; Biological Process: proteolysis (GO:0006508);;	--	--	Protein ASPARTIC PROTEASE IN GUARD CELL 2 (Precursor) GN=ASPG2 OS=Arabidopsis thaliana (Mouse-ear cress) PE=2 SV=1	O	Posttranslational modification, protein turnover, chaperones	Aspartic proteinase nepenthesin-1, putative [Theobroma cacao]	molecular function: catalytic activity (GO:0003824);; biological process: metabolic process (GO:0008152);;
gene13987	29.862	3.26825	3.26047	LOC107421936	--	--	--	K17553|2.87196e-13|mdm:103455705|type 1 phosphatases regulator YPI1-like; K17553 protein phosphatase 1 regulatory subunit 11 (A)	--	--	S	Function unknown	hypothetical protein L484_008317 [Morus notabilis]	--
gene14005	5.11481	1.68548	1.29303	LOC107421958	--	--	--	--	--	Putative GEM-like protein 8 GN=At5g23370 OS=Arabidopsis thaliana (Mouse-ear cress) PE=3 SV=1	S	Function unknown	hypothetical protein PRUPE_ppa026708mg [Prunus persica]	--
gene14069	2.79044	1.13064	1.21413	LOC107422028	--	--	--	--	--	Putative disease resistance RPP13-like protein 1 GN=RPPL1 OS=Arabidopsis thaliana (Mouse-ear cress) PE=3 SV=1	S	Function unknown	PREDICTED: putative disease resistance protein At3g14460, partial [Pyrus x bretschneideri]	--
gene14268	133.737	55.7052	64.3295	LOC107422238	[R]	General function prediction only	Molecular Function: chitinase activity (GO:0004568);; Cellular Component: Golgi apparatus (GO:0005794);; Biological Process: chitin catabolic process (GO:0006032);; Biological Process: glycolytic process (GO:0006096);; Biological Process: calcium ion transport (GO:0006816);; Biological Process: water transport (GO:0006833);; Biological Process: hyperosmotic response (GO:0006972);; Biological Proc…	--	--	Chitinase-like protein 1 (Precursor) GN=At1g05850 OS=Arabidopsis thaliana (Mouse-ear cress) PE=1 SV=1	R	General function prediction only	Chitinase family protein [Theobroma cacao]	cellular component: extracellular region (GO:0005576);; cellular component: cell part (GO:0044464);; cellular component: cell (GO:0005623);; cellular component: organelle (GO:0043226);; molecular function: catalytic activity (GO:0003824);; molecular function: binding (GO:0005488);; biological process: response to stimulus (GO:0050896);; biological process: biological regulation (GO:0065007);; bio…
gene14662	4.36075	0.803619	0.729159	LOC107422661	[I]	Lipid transport and metabolism	Molecular Function: enoyl-CoA hydratase activity (GO:0004300);; Biological Process: metabolic process (GO:0008152);; Molecular Function: hydrolase activity (GO:0016787);;	K05605|0|pper:PRUPE_ppa006573mg|hypothetical protein; K05605 3-hydroxyisobutyryl-CoA hydrolase [EC:3.1.2.4] (A)	Valine, leucine and isoleucine degradation (ko00280);; beta-Alanine metabolism (ko00410);; Propanoate metabolism (ko00640);; Carbon metabolism (ko01200)	3-hydroxyisobutyryl-CoA hydrolase-like protein 1, mitochondrial (Precursor) GN=At3g60510 OS=Arabidopsis thaliana (Mouse-ear cress) PE=2 SV=1	I	Lipid transport and metabolism	hypothetical protein PRUPE_ppa006573mg [Prunus persica]	biological process: metabolic process (GO:0008152);; molecular function: catalytic activity (GO:0003824);;
gene14665	11.32	5.07439	5.21127	LOC107422639	--	--	--	--	--	--	S	Function unknown	PREDICTED: uncharacterized protein LOC103483126 [Cucumis melo]	--
gene1470	8.35621	4.12275	5.33518	LOC107422761	[Q]	Secondary metabolites biosynthesis, transport and catabolism	Molecular Function: copper ion binding (GO:0005507);; Molecular Function: L-ascorbate oxidase activity (GO:0008447);; Cellular Component: plant-type cell wall (GO:0009505);; Cellular Component: membrane (GO:0016020);; Cellular Component: apoplast (GO:0048046);; Biological Process: oxidation-reduction process (GO:0055114);;	--	--	L-ascorbate oxidase homolog (Precursor) GN=Bp10 OS=Brassica napus (Rape) PE=2 SV=1	Q	Secondary metabolites biosynthesis, transport and catabolism	PREDICTED: L-ascorbate oxidase homolog [Pyrus x bretschneideri]	cellular component: membrane (GO:0016020);; cellular component: cell (GO:0005623);; cellular component: cell part (GO:0044464);; cellular component: extracellular region (GO:0005576);; molecular function: binding (GO:0005488);; molecular function: catalytic activity (GO:0003824);; biological process: metabolic process (GO:0008152);; biological process: single-organism process (GO:0044699);;
gene14955	28.8614	9.8305	14.8582	LOC107423007	--	--	--	--	--	--	S	Function unknown	hypothetical protein L484_016343 [Morus notabilis]	--
gene15262	33.9357	11.289	14.0431	LOC107423356	--	--	--	K18177|6.93006e-27|sly:101266756|uncharacterized LOC101266756; K18177 cytochrome c oxidase assembly factor 4 (A)	--	--	S	Function unknown	PREDICTED: uncharacterized protein LOC101266756 isoform X2 [Solanum lycopersicum]	--
gene15312	10.6782	5.27838	5.23098	LOC107423397	--	--	Molecular Function: metal ion binding (GO:0046872);;	--	--	E3 ubiquitin protein ligase RIE1 GN=RIE1 OS=Arabidopsis thaliana (Mouse-ear cress) PE=2 SV=1	O	Posttranslational modification, protein turnover, chaperones	PREDICTED: E3 ubiquitin-protein ligase At4g11680-like [Cucumis melo]	molecular function: binding (GO:0005488);;
gene15490	1.17228	0.0823199	0.0584158	LOC107423603	--	--	Molecular Function: metal ion binding (GO:0046872);;	--	--	E3 ubiquitin-protein ligase At4g11680 GN=At4g11680 OS=Arabidopsis thaliana (Mouse-ear cress) PE=2 SV=1	O	Posttranslational modification, protein turnover, chaperones	PREDICTED: E3 ubiquitin-protein ligase At4g11680-like [Cucumis sativus]	molecular function: binding (GO:0005488);;
gene15495	2.90845	0.0122539	0.01047	LOC107423598	--	--	Molecular Function: catalytic activity (GO:0003824);; Biological Process: metabolic process (GO:0008152);; Cellular Component: membrane (GO:0016020);;	--	--	Probable arabinosyltransferase ARAD1 GN=ARAD1 OS=Arabidopsis thaliana (Mouse-ear cress) PE=1 SV=1	GMW	Carbohydrate transport and metabolism;; Cell wall/membrane/envelope biogenesis;; Extracellular structures	PREDICTED: probable arabinosyltransferase ARAD1 [Prunus mume]	biological process: metabolic process (GO:0008152);; molecular function: catalytic activity (GO:0003824);; cellular component: membrane (GO:0016020);;
gene15497	5.30591	1.66893	1.34108	LOC107423597	--	--	--	--	--	--	S	Function unknown	PREDICTED: uncharacterized protein LOC103332002 [Prunus mume]	--
gene15579	188.258	36.1986	33.5586	LOC107423686	[Q]	Secondary metabolites biosynthesis, transport and catabolism	Molecular Function: monooxygenase activity (GO:0004497);; Molecular Function: iron ion binding (GO:0005506);; Molecular Function: electron carrier activity (GO:0009055);; Biological Process: fruit development (GO:0010154);; Molecular Function: oxidoreductase activity, acting on paired donors, with incorporation or reduction of molecular oxygen (GO:0016705);; Molecular Function: heme binding (GO:0…	--	--	Cytochrome P450 78A3 GN=CYP78A3 OS=Glycine max (Soybean) PE=2 SV=1	Q	Secondary metabolites biosynthesis, transport and catabolism	PREDICTED: cytochrome P450 78A3-like [Fragaria vesca subsp. vesca]	molecular function: electron carrier activity (GO:0009055);; molecular function: binding (GO:0005488);; molecular function: catalytic activity (GO:0003824);; biological process: developmental process (GO:0032502);; biological process: multicellular organismal process (GO:0032501);; biological process: metabolic process (GO:0008152);; biological process: single-organism process (GO:0044699);; biol…
gene15619	19.0806	8.5359	10.633	LOC107423751	--	--	--	--	--	Interactor of constitutive active ROPs 4 GN=F3F9.6 OS=Arabidopsis thaliana (Mouse-ear cress) PE=1 SV=2	S	Function unknown	PREDICTED: interactor of constitutive active ROPs 4-like [Prunus mume]	--
gene15640	5.9612	1.74281	2.64059	LOC107423710	--	--	Biological Process: pattern specification process (GO:0007389);; Biological Process: regulation of cell size (GO:0008361);; Cellular Component: plant-type cell wall (GO:0009505);; Biological Process: plant-type cell wall organization (GO:0009664);; Biological Process: plant-type cell wall biogenesis (GO:0009832);; Biological Process: auxin polar transport (GO:0009926);; Biological Process: root m…	--	--	Fasciclin-like arabinogalactan protein 8 (Precursor) GN=FLA8 OS=Arabidopsis thaliana (Mouse-ear cress) PE=1 SV=1	R	General function prediction only	PREDICTED: fasciclin-like arabinogalactan protein 8 [Prunus mume]	cellular component: cell (GO:0005623);; cellular component: cell part (GO:0044464);; cellular component: membrane (GO:0016020);; cellular component: membrane part (GO:0044425);; cellular component: extracellular region (GO:0005576);; biological process: single-organism process (GO:0044699);; biological process: localization (GO:0051179);; biological process: cellular process (GO:0009987);; biolog…
gene15728	22.0847	3.19346	4.71109	LOC107423848	--	--	Molecular Function: enzyme inhibitor activity (GO:0004857);; Cellular Component: cell wall (GO:0005618);; Molecular Function: pectinesterase activity (GO:0030599);; Biological Process: cell wall modification (GO:0042545);; Biological Process: negative regulation of catalytic activity (GO:0043086);; Molecular Function: aspartyl esterase activity (GO:0045330);; Biological Process: pectin catabolic …	K01051|0|tcc:TCM_037441|Pectin methylesterase 3; K01051 pectinesterase [EC:3.1.1.11] (A)	Pentose and glucuronate interconversions (ko00040);; Starch and sucrose metabolism (ko00500)	Pectinesterase 3 (Precursor) OS=Citrus sinensis (Sweet orange) PE=1 SV=1	G	Carbohydrate transport and metabolism	Pectin methylesterase 3 [Theobroma cacao]	biological process: cellular process (GO:0009987);; biological process: biological regulation (GO:0065007);; biological process: cellular component organization or biogenesis (GO:0071840);; biological process: metabolic process (GO:0008152);; molecular function: catalytic activity (GO:0003824);; molecular function: enzyme regulator activity (GO:0030234);; cellular component: cell (GO:0005623);; c…
gene15815	1.85265	0.207951	0.0995615	LOC107423930	--	--	Cellular Component: integral component of membrane (GO:0016021);; Molecular Function: NAD(P)H oxidase activity (GO:0016174);; Biological Process: oxidation-reduction process (GO:0055114);;	--	--	Ferric reduction oxidase 7, chloroplastic (Precursor) GN=FRO7 OS=Arabidopsis thaliana (Mouse-ear cress) PE=2 SV=1	PQ	Inorganic ion transport and metabolism;; Secondary metabolites biosynthesis, transport and catabolism	PREDICTED: ferric reduction oxidase 6 [Pyrus x bretschneideri]	molecular function: catalytic activity (GO:0003824);; biological process: single-organism process (GO:0044699);; biological process: metabolic process (GO:0008152);; cellular component: membrane part (GO:0044425);; cellular component: membrane (GO:0016020);;
gene15839	5.1479	1.04758	1.18383	LOC107423948	--	--	--	--	--	--	S	Function unknown	hypothetical protein PRUPE_ppa015296mg [Prunus persica]	--
gene16081	1.77716	0.819365	0.810196	LOC107424223	[J]	Translation, ribosomal structure and biogenesis	Molecular Function: translation elongation factor activity (GO:0003746);; Molecular Function: GTPase activity (GO:0003924);; Molecular Function: GTP binding (GO:0005525);; Cellular Component: intracellular (GO:0005622);; Biological Process: GTP catabolic process (GO:0006184);; Biological Process: translational elongation (GO:0006414);;	K02355|1.36939e-92|csv:101223656|elongation factor G, mitochondrial-like; K02355 elongation factor G (A)	--	Elongation factor G-1, mitochondrial (Precursor) GN=MEFG1 OS=Arabidopsis thaliana (Mouse-ear cress) PE=2 SV=1	J	Translation, ribosomal structure and biogenesis	PREDICTED: elongation factor G, mitochondrial-like, partial [Cucumis sativus]	biological process: metabolic process (GO:0008152);; biological process: single-organism process (GO:0044699);; biological process: cellular process (GO:0009987);; molecular function: binding (GO:0005488);; molecular function: catalytic activity (GO:0003824);; cellular component: cell (GO:0005623);; cellular component: cell part (GO:0044464);;
gene16134	181.973	43.7681	58.0632	LOC107424261	[O]	Posttranslational modification, protein turnover, chaperones	Cellular Component: endoplasmic reticulum lumen (GO:0005788);; Biological Process: response to stress (GO:0006950);;	K13993|1.16042e-87|gmx:100526965|uncharacterized LOC100526965; K13993 HSP20 family protein (A)	Protein processing in endoplasmic reticulum (ko04141)	22.0 kDa class IV heat shock protein (Precursor) GN=HSP22.0 OS=Glycine max (Soybean) PE=3 SV=1	O	Posttranslational modification, protein turnover, chaperones	22.0 kDa class IV heat shock protein [Glycine soja]	biological process: response to stimulus (GO:0050896);; cellular component: cell part (GO:0044464);; cellular component: cell (GO:0005623);; cellular component: organelle (GO:0043226);; cellular component: organelle part (GO:0044422);; cellular component: membrane-enclosed lumen (GO:0031974);;
gene16260	1.20895	0.0552018	0.0635741	LOC107424407	--	--	Biological Process: transmembrane transport (GO:0055085);;	--	--	Oligopeptide transporter 7 GN=OPT7 OS=Arabidopsis thaliana (Mouse-ear cress) PE=2 SV=1	P	Inorganic ion transport and metabolism	PREDICTED: oligopeptide transporter 7-like [Vitis vinifera]	biological process: cellular process (GO:0009987);; biological process: single-organism process (GO:0044699);; biological process: localization (GO:0051179);;
gene16265	1.54771	0.490263	0.412312	LOC107424475	--	--	Biological Process: transmembrane transport (GO:0055085);;	--	--	Oligopeptide transporter 7 GN=OPT7 OS=Arabidopsis thaliana (Mouse-ear cress) PE=2 SV=1	P	Inorganic ion transport and metabolism	PREDICTED: oligopeptide transporter 7-like [Vitis vinifera]	biological process: single-organism process (GO:0044699);; biological process: localization (GO:0051179);; biological process: cellular process (GO:0009987);;
gene16281	11.4822	5.85936	5.20163	LOC107424432	[P]	Inorganic ion transport and metabolism	Cellular Component: mitochondrion (GO:0005739);; Cellular Component: vacuolar membrane (GO:0005774);; Cellular Component: peroxisomal membrane (GO:0005778);; Biological Process: response to oxidative stress (GO:0006979);; Cellular Component: plasmodesma (GO:0009506);; Cellular Component: chloroplast envelope (GO:0009941);; Molecular Function: L-ascorbate peroxidase activity (GO:0016688);; Molecul…	K00434|8.87493e-158|sot:102597356|APX; L-ascorbate peroxidase 3, peroxisomal-like; K00434 L-ascorbate peroxidase [EC:1.11.1.11] (A)	Ascorbate and aldarate metabolism (ko00053);; Glutathione metabolism (ko00480)	L-ascorbate peroxidase 3, peroxisomal (Precursor) GN=M4E13.60 OS=Arabidopsis thaliana (Mouse-ear cress) PE=1 SV=1	R	General function prediction only	PREDICTED: L-ascorbate peroxidase 3, peroxisomal [Nicotiana tomentosiformis]	cellular component: cell part (GO:0044464);; cellular component: cell (GO:0005623);; cellular component: organelle (GO:0043226);; cellular component: organelle part (GO:0044422);; cellular component: membrane (GO:0016020);; cellular component: cell junction (GO:0030054);; biological process: metabolic process (GO:0008152);; biological process: response to stimulus (GO:0050896);; biological proces…
gene16302	13.8501	5.75056	5.43887	LOC107424428	[S]	Function unknown	Cellular Component: nucleus (GO:0005634);;	--	--	--	S	Function unknown	Pre-rRNA-processing protein esf1 [Morus notabilis]	cellular component: organelle (GO:0043226);; cellular component: cell (GO:0005623);; cellular component: cell part (GO:0044464);;
gene16331	1.31785	0.426782	0.369004	LOC107424485	--	--	--	--	--	Putative F-box protein At1g65770 GN=At1g65770 OS=Arabidopsis thaliana (Mouse-ear cress) PE=4 SV=1	R	General function prediction only	PREDICTED: putative F-box protein At1g65770 [Pyrus x bretschneideri]	--
gene16436	2.749	1.36438	1.49468	LOC107424609	--	--	--	K14001|1.0627e-78|vvi:100266149|hsp70 nucleotide exchange factor FES1; K14001 nucleotide exchange factor SIL1 (A)	Protein processing in endoplasmic reticulum (ko04141)	--	O	Posttranslational modification, protein turnover, chaperones	unnamed protein product [Vitis vinifera]	--
gene16441	4.3598	0.0973706	0.236889	LOC107424622	[G]	Carbohydrate transport and metabolism	Molecular Function: hydrolase activity, hydrolyzing O-glycosyl compounds (GO:0004553);; Biological Process: cellular glucan metabolic process (GO:0006073);; Cellular Component: plant-type cell wall (GO:0009505);; Cellular Component: chloroplast (GO:0009507);; Biological Process: response to mechanical stimulus (GO:0009612);; Biological Process: response to low light intensity stimulus (GO:0009645…	K08235|0|pop:POPTR_0001s12640g|POPTRDRAFT_708892; EXGT1 family protein; K08235 xyloglucan:xyloglucosyl transferase [EC:2.4.1.207] (A)	--	Probable xyloglucan endotransglucosylase/hydrolase protein B (Precursor) GN=XTHB OS=Phaseolus angularis (Azuki bean) PE=2 SV=1	R	General function prediction only	EXGT1 family protein [Populus trichocarpa]	cellular component: extracellular region (GO:0005576);; cellular component: membrane (GO:0016020);; cellular component: cell (GO:0005623);; cellular component: cell part (GO:0044464);; cellular component: organelle (GO:0043226);; biological process: developmental process (GO:0032502);; biological process: cellular component organization or biogenesis (GO:0071840);; biological process: cellular pr…
gene16466	6.91682	1.74591	1.48827	LOC107424674	[R]	General function prediction only	Biological Process: microtubule cytoskeleton organization (GO:0000226);; Molecular Function: GTPase activity (GO:0003924);; Molecular Function: GTP binding (GO:0005525);; Cellular Component: intracellular (GO:0005622);; Biological Process: GTP catabolic process (GO:0006184);; Biological Process: intracellular protein transport (GO:0006886);; Biological Process: tubulin complex assembly (GO:000702…	K07943|3.92321e-105|gmx:100805880|ADP-ribosylation factor-like protein 2-like; K07943 ADP-ribosylation factor-like protein 2 (A)	--	ADP-ribosylation factor-like protein 2 GN=T30D6.10 OS=Arabidopsis thaliana (Mouse-ear cress) PE=2 SV=1	U	Intracellular trafficking, secretion, and vesicular transport	PREDICTED: ADP-ribosylation factor-like protein 2-like [Glycine max]	cellular component: cell (GO:0005623);; cellular component: cell part (GO:0044464);; molecular function: binding (GO:0005488);; molecular function: catalytic activity (GO:0003824);; biological process: developmental process (GO:0032502);; biological process: cellular component organization or biogenesis (GO:0071840);; biological process: cellular process (GO:0009987);; biological process: localiz…
gene16564	1.76616	0.701771	0.567344	LOC107424734	--	--	--	--	--	Putative B3 domain-containing protein Os03g0621600 GN=OSJNBb0111B07.17 OS=Oryza sativa subsp. japonica (Rice) PE=3 SV=1	S	Function unknown	Uncharacterized protein TCM_000519 [Theobroma cacao]	--
gene16660	0.526838	0.0960031	0.0975176	LOC107424807	--	--	--	--	--	Antimicrobial peptide 2d (Precursor; Fragment) OS=Macadamia integrifolia (Macadamia nut) PE=1 SV=1	R	General function prediction only	PREDICTED: globulin-1 S allele, partial [Prunus mume]	--
gene16680	92.8235	9.43969	8.25814	LOC107424862	--	--	Biological Process: retrograde vesicle-mediated transport, Golgi to ER (GO:0006890);; Cellular Component: integral component of membrane (GO:0016021);; Biological Process: maintenance of protein location (GO:0045185);;	--	--	Protein RER1A GN=RER1A OS=Arabidopsis thaliana (Mouse-ear cress) PE=1 SV=1	U	Intracellular trafficking, secretion, and vesicular transport	PREDICTED: protein RER1A-like [Fragaria vesca subsp. vesca]	biological process: biological regulation (GO:0065007);; biological process: localization (GO:0051179);; biological process: single-organism process (GO:0044699);; cellular component: membrane part (GO:0044425);; cellular component: membrane (GO:0016020);;
gene16691	1.76771	0	0	LOC107424872	[Q]	Secondary metabolites biosynthesis, transport and catabolism	--	--	--	Cytochrome P450 81E8 {ECO:0000303|PubMed:14617078} OS=Medicago truncatula (Barrel medic) PE=2 SV=1	Q	Secondary metabolites biosynthesis, transport and catabolism	Isoflavone 2&apos;-hydroxylase [Morus notabilis]	--
gene1671	26.3256	11.9183	15.022	LOC107425089	--	--	Molecular Function: DNA binding (GO:0003677);; Molecular Function: sequence-specific DNA binding transcription factor activity (GO:0003700);; Cellular Component: nucleus (GO:0005634);; Biological Process: regulation of transcription, DNA-templated (GO:0006355);; Biological Process: ethylene-activated signaling pathway (GO:0009873);;	--	--	Ethylene-responsive transcription factor 12 GN=F3M18.21 OS=Arabidopsis thaliana (Mouse-ear cress) PE=2 SV=1	K	Transcription	PREDICTED: ethylene-responsive transcription factor 12 [Vitis vinifera]	cellular component: cell part (GO:0044464);; cellular component: cell (GO:0005623);; cellular component: organelle (GO:0043226);; biological process: signaling (GO:0023052);; biological process: single-organism process (GO:0044699);; biological process: response to stimulus (GO:0050896);; biological process: cellular process (GO:0009987);; biological process: biological regulation (GO:0065007);; …
gene16734	8.64181	3.94994	5.18981	LOC107424931	--	--	--	--	--	LOB domain-containing protein 38 GN=F3A4.20 OS=Arabidopsis thaliana (Mouse-ear cress) PE=2 SV=1	S	Function unknown	hypothetical protein L484_005914 [Morus notabilis]	--
gene16959	41.8252	9.7547	14.4735	LOC107425148	--	--	Cellular Component: mitochondrion (GO:0005739);;	--	--	Protein SKIP34 GN=SKIP34 OS=Arabidopsis thaliana (Mouse-ear cress) PE=1 SV=1	S	Function unknown	hypothetical protein PRUPE_ppa013876mg [Prunus persica]	cellular component: cell (GO:0005623);; cellular component: cell part (GO:0044464);; cellular component: organelle (GO:0043226);;
gene16999	7.72318	1.95969	3.77695	LOC107425176	[R]	General function prediction only	Molecular Function: nucleic acid binding (GO:0003676);;	--	--	Glycine-rich RNA-binding protein 2, mitochondrial (Precursor) GN=At4g13850 OS=Arabidopsis thaliana (Mouse-ear cress) PE=1 SV=1	R	General function prediction only	PREDICTED: glycine-rich RNA-binding protein 4, mitochondrial-like [Nelumbo nucifera]	molecular function: binding (GO:0005488);;
gene1705	103.053	44.6948	44.7188	LOC107425497	--	--	--	--	--	Probable arabinosyltransferase ARAD1 GN=ARAD1 OS=Arabidopsis thaliana (Mouse-ear cress) PE=1 SV=1	GMW	Carbohydrate transport and metabolism;; Cell wall/membrane/envelope biogenesis;; Extracellular structures	PREDICTED: probable arabinosyltransferase ARAD1 [Malus domestica]	--
gene17057	0.934362	0.26036	0.462205	LOC107425261	[G]	Carbohydrate transport and metabolism	Molecular Function: beta-galactosidase activity (GO:0004565);; Cellular Component: cell wall (GO:0005618);; Biological Process: carbohydrate metabolic process (GO:0005975);; Molecular Function: carbohydrate binding (GO:0030246);; Molecular Function: cation binding (GO:0043169);;	--	--	Beta-galactosidase 8 (Precursor) GN=BGAL8 OS=Arabidopsis thaliana (Mouse-ear cress) PE=2 SV=2	G	Carbohydrate transport and metabolism	Beta-galactosidase 8 isoform 1 [Theobroma cacao]	cellular component: cell (GO:0005623);; cellular component: cell part (GO:0044464);; molecular function: catalytic activity (GO:0003824);; molecular function: binding (GO:0005488);; biological process: metabolic process (GO:0008152);;
gene1706	6.64615	1.31137	1.14621	LOC107425524	[OC]	Posttranslational modification, protein turnover, chaperones;; Energy production and conversion	Cellular Component: mitochondrial matrix (GO:0005759);; Molecular Function: oxidoreductase activity, acting on a sulfur group of donors, disulfide as acceptor (GO:0016671);;	K03671|8.18178e-67|mdm:103446005|thioredoxin O2, mitochondrial-like; K03671 thioredoxin 1 (A)	--	Thioredoxin O1, mitochondrial (Precursor) GN=At2g35010 OS=Arabidopsis thaliana (Mouse-ear cress) PE=2 SV=1	O	Posttranslational modification, protein turnover, chaperones	PREDICTED: thioredoxin O2, mitochondrial-like [Malus domestica]	cellular component: membrane-enclosed lumen (GO:0031974);; cellular component: organelle part (GO:0044422);; cellular component: organelle (GO:0043226);; cellular component: cell part (GO:0044464);; cellular component: cell (GO:0005623);; biological process: single-organism process (GO:0044699);; biological process: metabolic process (GO:0008152);; molecular function: catalytic activity (GO:00038…
gene17153	6.2374	0.0368315	0.007464	LOC107425370	--	--	Biological Process: embryo development ending in seed dormancy (GO:0009793);;	--	--	Protein root UVB sensitive 6 {ECO:0000303|PubMed:19515790} OS=Arabidopsis thaliana (Mouse-ear cress) PE=2 SV=1	S	Function unknown	Uncharacterized protein isoform 2 [Theobroma cacao]	biological process: reproductive process (GO:0022414);; biological process: single-organism process (GO:0044699);; biological process: developmental process (GO:0032502);; biological process: multicellular organismal process (GO:0032501);;
gene17154	1.4575	0.443574	0.489286	LOC107425339	[O]	Posttranslational modification, protein turnover, chaperones	Molecular Function: binding (GO:0005488);;	K03544|0|pmum:103318949|ATP-dependent Clp protease ATP-binding subunit clpX-like, mitochondrial; K03544 ATP-dependent Clp protease ATP-binding subunit ClpX (A)	--	--	O	Posttranslational modification, protein turnover, chaperones	PREDICTED: ATP-dependent Clp protease ATP-binding subunit clpX-like, mitochondrial [Prunus mume]	molecular function: binding (GO:0005488);;
gene17163	3.14673	0.168479	0.144044	LOC107425378	[S]	Function unknown	Biological Process: maltose metabolic process (GO:0000023);; Biological Process: response to blue light (GO:0009637);; Biological Process: regulation of proton transport (GO:0010155);; Biological Process: starch biosynthetic process (GO:0019252);; Biological Process: isopentenyl diphosphate biosynthetic process, methylerythritol 4-phosphate pathway (GO:0019288);; Biological Process: positive regu…	K09919|3.85605e-38|cit:102627043|uncharacterized LOC102627043; K09919 hypothetical protein (A)	--	--	S	Function unknown	PREDICTED: uncharacterized protein LOC104110625 [Nicotiana tomentosiformis]	biological process: cellular process (GO:0009987);; biological process: biological regulation (GO:0065007);; biological process: metabolic process (GO:0008152);; biological process: single-organism process (GO:0044699);; biological process: response to stimulus (GO:0050896);;
gene17257	1.71828	0.346825	0.421449	LOC107425484	[B]	Chromatin structure and dynamics	Molecular Function: DNA binding (GO:0003677);; Cellular Component: intracellular (GO:0005622);;	--	--	Nuclear transcription factor Y subunit B-3 OS=Arabidopsis thaliana (Mouse-ear cress) PE=2 SV=1	K	Transcription	hypothetical protein JCGZ_09388 [Jatropha curcas]	molecular function: binding (GO:0005488);; cellular component: cell (GO:0005623);; cellular component: cell part (GO:0044464);;
gene17267	6.72416	2.70703	3.64279	LOC107425474	--	--	Biological Process: pentose-phosphate shunt (GO:0006098);; Cellular Component: chloroplast thylakoid (GO:0009534);;	--	--	--	S	Function unknown	PREDICTED: uncharacterized protein LOC103405615 [Malus domestica]	cellular component: organelle (GO:0043226);; cellular component: cell part (GO:0044464);; cellular component: cell (GO:0005623);; cellular component: organelle part (GO:0044422);; biological process: single-organism process (GO:0044699);; biological process: metabolic process (GO:0008152);; biological process: cellular process (GO:0009987);;
gene17311	5.54691	1.10685	1.13316	LOC107425527	--	--	--	--	--	--	--	--	PREDICTED: gelsolin-related protein of 125 kDa-like [Prunus mume]	--
gene17358	41.7927	4.00007	4.17637	LOC107425602	--	--	Molecular Function: enzyme inhibitor activity (GO:0004857);; Cellular Component: cell wall (GO:0005618);; Molecular Function: pectinesterase activity (GO:0030599);; Biological Process: cell wall modification (GO:0042545);; Biological Process: negative regulation of catalytic activity (GO:0043086);; Molecular Function: aspartyl esterase activity (GO:0045330);; Biological Process: pectin catabolic …	--	--	Pectinesterase 51 (Precursor) GN=F17I14.50 OS=Arabidopsis thaliana (Mouse-ear cress) PE=2 SV=1	R	General function prediction only	putative pectinesterase/pectinesterase inhibitor 51 [Morus notabilis]	cellular component: cell (GO:0005623);; cellular component: cell part (GO:0044464);; molecular function: catalytic activity (GO:0003824);; molecular function: enzyme regulator activity (GO:0030234);; biological process: metabolic process (GO:0008152);; biological process: cellular process (GO:0009987);; biological process: biological regulation (GO:0065007);; biological process: cellular componen…
gene17466	0.731087	0.166138	0.245952	LOC107425698	[L]	Replication, recombination and repair	--	--	--	Protein trichome berefringence-like 7 GN=TBL7 OS=Arabidopsis thaliana (Mouse-ear cress) PE=3 SV=1	S	Function unknown	hypothetical protein L484_020723 [Morus notabilis]	--
gene17486	4.80877	0.175245	0.350959	LOC107425734	--	--	Cellular Component: cell wall (GO:0005618);;	--	--	--	R	General function prediction only	hypothetical protein PRUPE_ppa007461mg [Prunus persica]	cellular component: cell (GO:0005623);; cellular component: cell part (GO:0044464);;
gene17647	0.516348	0.161459	0.206548	LOC107425822	--	--	Molecular Function: zinc ion binding (GO:0008270);;	K16277|0|tcc:TCM_004200|DREB2A-interacting protein 2 isoform 1; K16277 E3 ubiquitin-protein ligase DRIP [EC:6.3.2.19] (A)	--	E3 ubiquitin protein ligase DRIP2 GN=DRIP2 OS=Arabidopsis thaliana (Mouse-ear cress) PE=1 SV=1	O	Posttranslational modification, protein turnover, chaperones	E3 ubiquitin protein ligase DRIP2 [Morus notabilis]	molecular function: binding (GO:0005488);;
gene17648	9.7376	1.55534	1.81232	LOC107425851	--	--	Molecular Function: magnesium ion transmembrane transporter activity (GO:0015095);; Biological Process: magnesium ion transport (GO:0015693);; Cellular Component: integral component of membrane (GO:0016021);; Biological Process: transmembrane transport (GO:0055085);;	K16075|2.25561e-54|pmum:103334160|magnesium transporter MRS2-I-like; K16075 magnesium transporter (A)	--	Magnesium transporter MRS2-I GN=MRS2-I OS=Oryza sativa subsp. indica (Rice) PE=3 SV=1	P	Inorganic ion transport and metabolism	PREDICTED: magnesium transporter MRS2-I-like [Prunus mume]	biological process: single-organism process (GO:0044699);; biological process: localization (GO:0051179);; biological process: cellular process (GO:0009987);; molecular function: transporter activity (GO:0005215);; cellular component: membrane part (GO:0044425);; cellular component: membrane (GO:0016020);;
gene17652	16.373	7.6009	10.5865	LOC107425890	[K]	Transcription	Molecular Function: DNA-directed RNA polymerase activity (GO:0003899);; Biological Process: transcription, DNA-templated (GO:0006351);;	K03022|5.0864e-91|vvi:100261445|DNA-directed RNA polymerase III subunit RPC8; K03022 DNA-directed RNA polymerase III subunit RPC8 (A)	Purine metabolism (ko00230);; Pyrimidine metabolism (ko00240);; RNA polymerase (ko03020)	--	K	Transcription	DNA-directed RNA polymerase III subunit rpc8 [Morus notabilis]	molecular function: catalytic activity (GO:0003824);; biological process: metabolic process (GO:0008152);; biological process: cellular process (GO:0009987);;
gene17858	94.4133	0.187651	0.500505	LOC107426122	--	--	Biological Process: response to light stimulus (GO:0009416);; Cellular Component: chloroplast (GO:0009507);; Biological Process: response to sucrose (GO:0009744);; Biological Process: negative regulation of reductive pentose-phosphate cycle (GO:0080153);;	--	--	Calvin cycle protein CP12-2, chloroplastic (Precursor) GN=CP12-2 OS=Arabidopsis thaliana (Mouse-ear cress) PE=1 SV=1	R	General function prediction only	PREDICTED: calvin cycle protein CP12-1, chloroplastic [Vitis vinifera]	cellular component: cell part (GO:0044464);; cellular component: cell (GO:0005623);; cellular component: organelle (GO:0043226);; biological process: response to stimulus (GO:0050896);; biological process: biological regulation (GO:0065007);;
gene17859	26.0712	2.3399	3.3415	LOC107426119	--	--	Molecular Function: sequence-specific DNA binding transcription factor activity (GO:0003700);; Biological Process: regulation of transcription, DNA-templated (GO:0006355);; Molecular Function: sequence-specific DNA binding (GO:0043565);;	--	--	Ocs element-binding factor 1 GN=OBF1 OS=Zea mays (Maize) PE=2 SV=2	K	Transcription	Ocs element-binding factor 1 [Morus notabilis]	molecular function: binding (GO:0005488);; molecular function: nucleic acid binding transcription factor activity (GO:0001071);; biological process: biological regulation (GO:0065007);;
gene17910	3.31343	1.48622	1.29488	LOC107426209	--	--	--	--	--	--	M	Cell wall/membrane/envelope biogenesis	PREDICTED: protein notum homolog isoform X2 [Prunus mume]	--
gene17960	5.89194	2.33148	2.29943	LOC107426180	--	--	Molecular Function: inorganic anion exchanger activity (GO:0005452);; Cellular Component: endosome (GO:0005768);; Cellular Component: vacuole (GO:0005773);; Cellular Component: integral component of membrane (GO:0016021);; Cellular Component: lateral plasma membrane (GO:0016328);; Biological Process: borate transmembrane transport (GO:0035445);; Cellular Component: columella (GO:0043674);; Molecu…	--	--	Boron transporter 1 GN=BOR1 OS=Arabidopsis thaliana (Mouse-ear cress) PE=1 SV=1	P	Inorganic ion transport and metabolism	PREDICTED: probable boron transporter 2 [Prunus mume]	molecular function: transporter activity (GO:0005215);; biological process: cellular process (GO:0009987);; biological process: single-organism process (GO:0044699);; biological process: localization (GO:0051179);; cellular component: cell (GO:0005623);; cellular component: cell part (GO:0044464);; cellular component: organelle (GO:0043226);; cellular component: membrane (GO:0016020);; cellular c…
gene17968	12.8437	3.15774	5.4649	LOC107426376	[K]	Transcription	Biological Process: RNA splicing, via endonucleolytic cleavage and ligation (GO:0000394);; Molecular Function: DNA binding (GO:0003677);; Molecular Function: translation initiation factor activity (GO:0003743);; Cellular Component: transcription factor complex (GO:0005667);; Biological Process: DNA-templated transcription, initiation (GO:0006352);; Biological Process: transcription from RNA polym…	K03127|7.63288e-82|pper:PRUPE_ppa012882mg|hypothetical protein; K03127 transcription initiation factor TFIID subunit 13 (A)	Basal transcription factors (ko03022)	Transcription initiation factor TFIID subunit 13 GN=TAF13 OS=Arabidopsis thaliana (Mouse-ear cress) PE=1 SV=1	K	Transcription	hypothetical protein PRUPE_ppa012882mg [Prunus persica]	molecular function: binding (GO:0005488);; biological process: metabolic process (GO:0008152);; biological process: cellular process (GO:0009987);; cellular component: macromolecular complex (GO:0032991);; cellular component: cell part (GO:0044464);; cellular component: cell (GO:0005623);;
gene17989	13.0082	5.17898	8.13102	LOC107426371	--	--	Molecular Function: transferase activity, transferring glycosyl groups (GO:0016757);;	--	--	Probable galacturonosyltransferase-like 7 GN=GATL7 OS=Arabidopsis thaliana (Mouse-ear cress) PE=2 SV=1	G	Carbohydrate transport and metabolism	putative galacturonosyltransferase-like 7 [Morus notabilis]	biological process: metabolic process (GO:0008152);; molecular function: catalytic activity (GO:0003824);;
gene18058	2.12399	0.329144	0.423913	LOC107426359	[G]	Carbohydrate transport and metabolism	--	K01188|5.11211e-166|tcc:TCM_004646|Beta glucosidase 11 isoform 1; K01188 beta-glucosidase [EC:3.2.1.21] (A)	Cyanoamino acid metabolism (ko00460);; Starch and sucrose metabolism (ko00500);; Phenylpropanoid biosynthesis (ko00940)	Beta-glucosidase 11 (Precursor) GN=BGLU11 OS=Arabidopsis thaliana (Mouse-ear cress) PE=2 SV=2	G	Carbohydrate transport and metabolism	PREDICTED: beta-glucosidase 11-like isoform X4 [Citrus sinensis]	--
gene18061	75.9799	29.6792	29.8133	LOC107426277	--	--	Molecular Function: ubiquitin-protein transferase activity (GO:0004842);; Cellular Component: nucleus (GO:0005634);; Biological Process: phosphate ion transport (GO:0006817);; Molecular Function: zinc ion binding (GO:0008270);; Biological Process: plant-type hypersensitive response (GO:0009626);; Biological Process: systemic acquired resistance (GO:0009627);; Biological Process: salicylic acid bi…	K16275|0|tcc:TCM_004641|SPX domain-containing protein; K16275 E3 ubiquitin-protein ligase BAH [EC:6.3.2.19] (A)	--	Probable E3 ubiquitin-protein ligase BAH1-like 1 GN=OsI_27296 OS=Oryza sativa subsp. indica (Rice) PE=3 SV=1	O	Posttranslational modification, protein turnover, chaperones	SPX domain-containing protein [Theobroma cacao]	cellular component: cell part (GO:0044464);; cellular component: cell (GO:0005623);; cellular component: organelle (GO:0043226);; biological process: response to stimulus (GO:0050896);; biological process: biological regulation (GO:0065007);; biological process: multi-organism process (GO:0051704);; biological process: metabolic process (GO:0008152);; biological process: localization (GO:0051179)…
gene18113	19.1208	7.00087	9.39641	LOC107426400	--	--	--	--	--	--	S	Function unknown	hypothetical protein PRUPE_ppa019227mg [Prunus persica]	--
gene18176	0.90438	0.187785	0.368948	LOC107426448	--	--	--	--	--	--	S	Function unknown	PREDICTED: uncharacterized protein LOC103445563 [Malus domestica]	--
gene18204	1.31598	0.560794	0.574142	LOC107426560	--	--	--	--	--	Pentatricopeptide repeat-containing protein At5g48910 GN=PCMP-H38 OS=Arabidopsis thaliana (Mouse-ear cress) PE=2 SV=1	R	General function prediction only	hypothetical protein L484_015170 [Morus notabilis]	--
gene18222	85.0333	32.5534	31.8094	LOC107426600	--	--	--	--	--	Protein SULFUR DEFICIENCY-INDUCED 1 {ECO:0000303|PubMed:19154231} OS=Arabidopsis thaliana (Mouse-ear cress) PE=2 SV=1	R	General function prediction only	PREDICTED: uncharacterized protein LOC103928676 [Pyrus x bretschneideri]	--
gene18238	11.4772	3.81457	3.85127	LOC107426597	--	--	--	--	--	--	S	Function unknown	hypothetical protein L484_015217 [Morus notabilis]	--
gene18261	26.2696	2.49403	2.80899	LOC107426642	--	--	--	--	--	--	--	--	--	--
gene18270	3.60223	0.445319	0.752298	LOC107426643	[O]	Posttranslational modification, protein turnover, chaperones	Cellular Component: cytosol (GO:0005829);; Biological Process: protein glycosylation (GO:0006486);; Biological Process: protein targeting to vacuole (GO:0006623);; Molecular Function: zinc ion binding (GO:0008270);;	--	--	--	O	Posttranslational modification, protein turnover, chaperones	PREDICTED: UBX domain-containing protein 4 [Vitis vinifera]	biological process: cellular process (GO:0009987);; biological process: single-organism process (GO:0044699);; biological process: metabolic process (GO:0008152);; biological process: localization (GO:0051179);; molecular function: binding (GO:0005488);; cellular component: cell part (GO:0044464);; cellular component: cell (GO:0005623);;
gene18336	7.66077	2.44708	3.25328	LOC107426749	[J]	Translation, ribosomal structure and biogenesis	Molecular Function: nucleotide binding (GO:0000166);; Molecular Function: aminoacyl-tRNA ligase activity (GO:0004812);; Biological Process: tRNA aminoacylation for protein translation (GO:0006418);; Cellular Component: intracellular membrane-bounded organelle (GO:0043231);; Cellular Component: cytoplasmic part (GO:0044444);;	K01893|0|cic:CICLE_v10030945mg|hypothetical protein; K01893 asparaginyl-tRNA synthetase [EC:6.1.1.22] (A)	Aminoacyl-tRNA biosynthesis (ko00970)	Asparagine--tRNA ligase, cytoplasmic 2 GN=F21O3.13 OS=Arabidopsis thaliana (Mouse-ear cress) PE=1 SV=2	J	Translation, ribosomal structure and biogenesis	hypothetical protein CICLE_v10030945mg [Citrus clementina]	cellular component: organelle (GO:0043226);; cellular component: cell part (GO:0044464);; cellular component: cell (GO:0005623);; molecular function: binding (GO:0005488);; molecular function: catalytic activity (GO:0003824);; biological process: metabolic process (GO:0008152);; biological process: single-organism process (GO:0044699);; biological process: cellular process (GO:0009987);;
gene18348	441.586	53.0653	46.5909	LOC107426591	--	--	--	--	--	--	S	Function unknown	PREDICTED: coiled-coil-helix-coiled-coil-helix domain-containing protein 10, mitochondrial [Sesamum indicum]	--
gene18349	9.35961	3.64942	4.49472	LOC107426808	[F]	Nucleotide transport and metabolism	--	--	--	--	F	Nucleotide transport and metabolism	PREDICTED: putative glutamine amidotransferase YLR126C isoform X2 [Prunus mume]	--
gene18417	5.86867	1.02882	0.818651	LOC107426756	--	--	--	K14488|1.34903e-45|pper:PRUPE_ppa021647mg|hypothetical protein; K14488 SAUR family protein (A)	Plant hormone signal transduction (ko04075)	Auxin-induced protein X10A OS=Glycine max (Soybean) PE=2 SV=1	S	Function unknown	hypothetical protein PRUPE_ppa021647mg [Prunus persica]	--
gene18487	8.59173	4.09862	4.5191	LOC107426614	[O]	Posttranslational modification, protein turnover, chaperones	Molecular Function: ATP binding (GO:0005524);; Cellular Component: cytoplasm (GO:0005737);; Molecular Function: nucleoside-triphosphatase activity (GO:0017111);; Biological Process: protein catabolic process (GO:0030163);;	K03064|7.25987e-32|gmx:100785863|26S protease regulatory subunit 10B homolog A-like; K03064 26S proteasome regulatory subunit T4 (A)	Proteasome (ko03050)	26S protease regulatory subunit 10B homolog A GN=RPT4A OS=Arabidopsis thaliana (Mouse-ear cress) PE=1 SV=1	O	Posttranslational modification, protein turnover, chaperones	unknown [Medicago truncatula]	molecular function: catalytic activity (GO:0003824);; molecular function: binding (GO:0005488);; biological process: metabolic process (GO:0008152);; cellular component: cell part (GO:0044464);; cellular component: cell (GO:0005623);;
gene18520	2.53658	0.754336	0.943515	LOC107426835	--	--	Molecular Function: signal transducer activity (GO:0004871);; Biological Process: signal transduction (GO:0007165);; Biological Process: response to light stimulus (GO:0009416);; Biological Process: positive gravitropism (GO:0009958);; Cellular Component: cell periphery (GO:0071944);;	--	--	BTB/POZ domain-containing protein NPY2 GN=NPY2 OS=Arabidopsis thaliana (Mouse-ear cress) PE=2 SV=1	R	General function prediction only	BTB/POZ domain-containing protein NPY2 [Morus notabilis]	biological process: response to stimulus (GO:0050896);; biological process: cellular process (GO:0009987);; biological process: biological regulation (GO:0065007);; molecular function: molecular transducer activity (GO:0060089);; cellular component: cell (GO:0005623);; cellular component: cell part (GO:0044464);;
gene18625	1.24236	0.426184	0.579443	LOC107426964	--	--	Molecular Function: sequence-specific DNA binding transcription factor activity (GO:0003700);; Biological Process: regulation of transcription, DNA-templated (GO:0006355);; Molecular Function: sequence-specific DNA binding (GO:0043565);; Molecular Function: anthocyanidin 3-O-glucosyltransferase activity (GO:0047213);;	--	--	Scopoletin glucosyltransferase GN=TOGT1 OS=Nicotiana tabacum (Common tobacco) PE=1 SV=1	CG	Energy production and conversion;; Carbohydrate transport and metabolism	UDP-glucose flavonoid 3-O-glucosyltransferase 7 [Morus notabilis]	biological process: biological regulation (GO:0065007);; biological process: metabolic process (GO:0008152);; molecular function: nucleic acid binding transcription factor activity (GO:0001071);; molecular function: catalytic activity (GO:0003824);; molecular function: binding (GO:0005488);;
gene18775	8.15161	0.208644	0.474625	LOC107427102	[S]	Function unknown	Cellular Component: extracellular region (GO:0005576);;	--	--	Basic form of pathogenesis-related protein 1 (Precursor) OS=Nicotiana tabacum (Common tobacco) PE=3 SV=1	S	Function unknown	PREDICTED: basic form of pathogenesis-related protein 1-like [Prunus mume]	cellular component: extracellular region (GO:0005576);;
gene19001	4.84554	0.208331	0.323148	LOC107427360	--	--	--	--	--	Mechanosensitive ion channel protein 8 GN=MSL8 OS=Arabidopsis thaliana (Mouse-ear cress) PE=2 SV=2	M	Cell wall/membrane/envelope biogenesis	PREDICTED: mechanosensitive ion channel protein 6-like [Malus domestica]	--
gene19002	9.29445	1.02194	1.63804	LOC107427362	[M]	Cell wall/membrane/envelope biogenesis	--	--	--	Mechanosensitive ion channel protein 8 GN=MSL8 OS=Arabidopsis thaliana (Mouse-ear cress) PE=2 SV=2	M	Cell wall/membrane/envelope biogenesis	PREDICTED: mechanosensitive ion channel protein 6-like [Pyrus x bretschneideri]	--
gene19017	7.7232	1.44695	2.0906	LOC107427391	--	--	--	--	--	--	S	Function unknown	PREDICTED: uncharacterized protein LOC103946604 [Pyrus x bretschneideri]	--
gene19036	120.788	23.2366	22.3582	LOC107427401	[HC]	Coenzyme transport and metabolism;; Energy production and conversion	--	--	--	Zeaxanthin epoxidase, chloroplastic (Precursor) GN=ZEP OS=Oncidium hybrid cultivar (Orchid) PE=2 SV=1	C	Energy production and conversion	PREDICTED: zeaxanthin epoxidase, chloroplastic-like [Pyrus x bretschneideri]	--
gene19118	1069.39	302.677	292.795	LOC107427514	--	--	Biological Process: response to karrikin (GO:0080167);;	--	--	--	S	Function unknown	PREDICTED: uncharacterized protein LOC103412580 [Malus domestica]	biological process: response to stimulus (GO:0050896);;
gene19126	12.9603	6.1769	7.29941	LOC107427513	[O]	Posttranslational modification, protein turnover, chaperones	Molecular Function: serine-type endopeptidase activity (GO:0004252);; Cellular Component: extracellular region (GO:0005576);; Biological Process: proteolysis (GO:0006508);; Cellular Component: membrane (GO:0016020);; Molecular Function: identical protein binding (GO:0042802);; Biological Process: negative regulation of catalytic activity (GO:0043086);;	--	--	Subtilisin-like protease (Precursor) GN=At5g67360 OS=Arabidopsis thaliana (Mouse-ear cress) PE=1 SV=1	O	Posttranslational modification, protein turnover, chaperones	Subtilisin-like protease [Morus notabilis]	molecular function: catalytic activity (GO:0003824);; molecular function: binding (GO:0005488);; biological process: biological regulation (GO:0065007);; biological process: metabolic process (GO:0008152);; cellular component: membrane (GO:0016020);; cellular component: extracellular region (GO:0005576);;
gene19132	17.9733	8.76575	8.90895	LOC107427497	[R]	General function prediction only	Cellular Component: Golgi apparatus (GO:0005794);; Biological Process: protein secretion (GO:0009306);;	--	--	Synaptotagmin-1 OS=Arabidopsis thaliana (Mouse-ear cress) PE=1 SV=2	R	General function prediction only	PREDICTED: synaptotagmin-2-like [Nelumbo nucifera]	cellular component: cell (GO:0005623);; cellular component: cell part (GO:0044464);; cellular component: organelle (GO:0043226);; biological process: cellular process (GO:0009987);; biological process: localization (GO:0051179);; biological process: single-organism process (GO:0044699);;
gene19138	17.699	1.83261	1.51554	LOC107427516	--	--	Cellular Component: extracellular region (GO:0005576);; Biological Process: syncytium formation (GO:0006949);; Biological Process: unidimensional cell growth (GO:0009826);; Biological Process: plant-type cell wall loosening (GO:0009828);; Biological Process: plant-type cell wall modification involved in multidimensional cell growth (GO:0009831);; Biological Process: xylem development (GO:0010089)…	--	--	Expansin-A15 (Precursor) GN=T17M13.26 OS=Arabidopsis thaliana (Mouse-ear cress) PE=2 SV=2	S	Function unknown	PREDICTED: expansin-A10 [Vitis vinifera]	biological process: single-organism process (GO:0044699);; biological process: metabolic process (GO:0008152);; biological process: cellular process (GO:0009987);; biological process: growth (GO:0040007);; biological process: cellular component organization or biogenesis (GO:0071840);; biological process: developmental process (GO:0032502);; cellular component: membrane (GO:0016020);; cellular co…
gene19143	8.44572	3.28131	3.00016	LOC107427517	--	--	Molecular Function: sequence-specific DNA binding transcription factor activity (GO:0003700);; Biological Process: regulation of transcription, DNA-templated (GO:0006355);; Molecular Function: sequence-specific DNA binding (GO:0043565);;	--	--	--	K	Transcription	hypothetical protein L484_008383 [Morus notabilis]	molecular function: binding (GO:0005488);; molecular function: nucleic acid binding transcription factor activity (GO:0001071);; biological process: biological regulation (GO:0065007);;
gene19262	1.61267	0	0	LOC107427653	[IQ]	Lipid transport and metabolism;; Secondary metabolites biosynthesis, transport and catabolism	Biological Process: metabolic process (GO:0008152);; Molecular Function: o-succinylbenzoate-CoA ligase activity (GO:0008756);;	--	--	Probable acyl-activating enzyme 6 GN=MQK4.6 OS=Arabidopsis thaliana (Mouse-ear cress) PE=1 SV=1	I	Lipid transport and metabolism	PREDICTED: probable acyl-activating enzyme 5, peroxisomal isoform X1 [Vitis vinifera]	biological process: metabolic process (GO:0008152);; molecular function: catalytic activity (GO:0003824);;
gene19288	11.4891	4.28371	5.84297	LOC107427684	[R]	General function prediction only	Biological Process: rRNA processing (GO:0006364);; Cellular Component: chloroplast thylakoid (GO:0009534);; Biological Process: plastid organization (GO:0009657);; Cellular Component: chloroplast envelope (GO:0009941);; Biological Process: photosystem II assembly (GO:0010207);; Biological Process: myo-inositol hexakisphosphate biosynthetic process (GO:0010264);; Molecular Function: hydrolase acti…	--	--	Pheophytinase, chloroplastic (Precursor) GN=MAC12.25 OS=Arabidopsis thaliana (Mouse-ear cress) PE=1 SV=1	R	General function prediction only	hypothetical protein L484_014767 [Morus notabilis]	biological process: metabolic process (GO:0008152);; biological process: single-organism process (GO:0044699);; biological process: cellular component organization or biogenesis (GO:0071840);; biological process: cellular process (GO:0009987);; biological process: biological regulation (GO:0065007);; molecular function: catalytic activity (GO:0003824);; cellular component: cell (GO:0005623);; cel…
gene19317	6.04462	1.36004	1.18222	LOC107427721	--	--	--	--	--	Transcription factor IBH1 GN=MFL8.8 OS=Arabidopsis thaliana (Mouse-ear cress) PE=1 SV=1	K	Transcription	PREDICTED: transcription factor IBH1-like [Prunus mume]	--
gene19319	2.31398	1.11188	1.35417	LOC107427719	--	--	Molecular Function: copper ion binding (GO:0005507);; Cellular Component: plasma membrane (GO:0005886);; Molecular Function: L-ascorbate oxidase activity (GO:0008447);; Cellular Component: plasmodesma (GO:0009506);; Biological Process: oxidation-reduction process (GO:0055114);;	--	--	Monocopper oxidase-like protein SKU5 (Precursor) GN=SKU5 OS=Arabidopsis thaliana (Mouse-ear cress) PE=1 SV=1	Q	Secondary metabolites biosynthesis, transport and catabolism	SKU5 similar 3 [Theobroma cacao]	biological process: metabolic process (GO:0008152);; biological process: single-organism process (GO:0044699);; molecular function: binding (GO:0005488);; molecular function: catalytic activity (GO:0003824);; cellular component: cell junction (GO:0030054);; cellular component: membrane (GO:0016020);; cellular component: cell (GO:0005623);; cellular component: cell part (GO:0044464);;
gene19345	6.14845	0.536734	0.291068	LOC107427742	[R]	General function prediction only	Molecular Function: nucleotide binding (GO:0000166);; Molecular Function: nucleic acid binding (GO:0003676);;	K14396|8.64692e-124|csv:101213499|polyadenylate-binding protein 2-like; K14396 polyadenylate-binding protein 2 (A)	mRNA surveillance pathway (ko03015)	Polyadenylate-binding protein 2 {ECO:0000303|PubMed:18479511} OS=Arabidopsis thaliana (Mouse-ear cress) PE=1 SV=1	A	RNA processing and modification	Polyadenylate-binding protein 2 [Morus notabilis]	molecular function: binding (GO:0005488);;
gene19409	14.755	7.27356	10.2921	LOC107427806	--	--	--	--	--	--	S	Function unknown	PREDICTED: uncharacterized protein LOC103445335 [Malus domestica]	--
gene19415	210.565	94.5094	97.7957	LOC107427810	[C]	Energy production and conversion	Cellular Component: mitochondrion (GO:0005739);; Biological Process: ubiquitin-dependent protein catabolic process (GO:0006511);; Molecular Function: electron carrier activity (GO:0009055);; Cellular Component: chloroplast (GO:0009507);; Biological Process: photorespiration (GO:0009853);; Molecular Function: iron-sulfur cluster binding (GO:0051536);; Biological Process: response to misfolded prot…	--	--	--	C	Energy production and conversion	hypothetical protein L484_007445 [Morus notabilis]	cellular component: organelle (GO:0043226);; cellular component: cell (GO:0005623);; cellular component: cell part (GO:0044464);; molecular function: binding (GO:0005488);; molecular function: electron carrier activity (GO:0009055);; biological process: response to stimulus (GO:0050896);; biological process: metabolic process (GO:0008152);; biological process: cellular process (GO:0009987);; biol…
gene19556	4.73496	2.45816	2.26025	LOC107427989	[J]	Translation, ribosomal structure and biogenesis	Molecular Function: structural constituent of ribosome (GO:0003735);; Cellular Component: ribosome (GO:0005840);; Biological Process: translation (GO:0006412);; Molecular Function: metal ion binding (GO:0046872);;	K02978|1.65495e-57|crb:CARUB_v10018269mg|hypothetical protein; K02978 small subunit ribosomal protein S27e (A)	Ribosome (ko03010)	40S ribosomal protein S27-2 OS=Arabidopsis thaliana (Mouse-ear cress) PE=2 SV=2	J	Translation, ribosomal structure and biogenesis	hypothetical protein CARUB_v10018269mg, partial [Capsella rubella]	cellular component: organelle (GO:0043226);; cellular component: cell (GO:0005623);; cellular component: cell part (GO:0044464);; cellular component: macromolecular complex (GO:0032991);; biological process: cellular process (GO:0009987);; biological process: metabolic process (GO:0008152);; molecular function: binding (GO:0005488);; molecular function: structural molecule activity (GO:0005198);;
gene19640	11.2685	3.37717	3.9624	LOC107428055	[P]	Inorganic ion transport and metabolism	Molecular Function: potassium ion transmembrane transporter activity (GO:0015079);; Cellular Component: membrane (GO:0016020);; Biological Process: potassium ion transmembrane transport (GO:0071805);;	K03549|0|cit:102613718|probable potassium transporter 17-like; K03549 KUP system potassium uptake protein (A)	--	Probable potassium transporter 17 OS=Oryza sativa subsp. japonica (Rice) PE=2 SV=2	P	Inorganic ion transport and metabolism	PREDICTED: probable potassium transporter 17 [Eucalyptus grandis]	cellular component: membrane (GO:0016020);; molecular function: transporter activity (GO:0005215);; biological process: cellular process (GO:0009987);; biological process: localization (GO:0051179);; biological process: single-organism process (GO:0044699);;
gene19710	9.04067	0.633851	0.631361	LOC107428138	[F]	Nucleotide transport and metabolism	Cellular Component: cytoplasm (GO:0005737);; Biological Process: pyrimidine nucleobase catabolic process (GO:0006208);; Molecular Function: hydrolase activity, acting on carbon-nitrogen (but not peptide) bonds, in cyclic amides (GO:0016812);;	K01464|0|tcc:TCM_040900|Pyrimidine 2 isoform 1; K01464 dihydropyrimidinase [EC:3.5.2.2] (A)	Pyrimidine metabolism (ko00240);; beta-Alanine metabolism (ko00410);; Pantothenate and CoA biosynthesis (ko00770)	Probable allantoinase GN=OsJ_16648 OS=Oryza sativa subsp. japonica (Rice) PE=2 SV=1	F	Nucleotide transport and metabolism	Pyrimidine 2 isoform 1 [Theobroma cacao]	molecular function: catalytic activity (GO:0003824);; biological process: metabolic process (GO:0008152);; biological process: single-organism process (GO:0044699);; biological process: cellular process (GO:0009987);; cellular component: cell part (GO:0044464);; cellular component: cell (GO:0005623);;
gene19768	14.5052	6.84144	6.76589	LOC107428198	[J]	Translation, ribosomal structure and biogenesis	Molecular Function: nucleic acid binding (GO:0003676);; Molecular Function: alanine-tRNA ligase activity (GO:0004813);; Molecular Function: ATP binding (GO:0005524);; Cellular Component: cytoplasm (GO:0005737);; Biological Process: alanyl-tRNA aminoacylation (GO:0006419);;	K01872|0|vvi:100249161|alanine--tRNA ligase; K01872 alanyl-tRNA synthetase [EC:6.1.1.7] (A)	Aminoacyl-tRNA biosynthesis (ko00970)	Alanine--tRNA ligase {ECO:0000255|HAMAP-Rule:MF_03133} (Precursor) GN=F14I3.17 OS=Arabidopsis thaliana (Mouse-ear cress) PE=1 SV=3	J	Translation, ribosomal structure and biogenesis	PREDICTED: alanine--tRNA ligase [Populus euphratica]	molecular function: binding (GO:0005488);; molecular function: catalytic activity (GO:0003824);; biological process: metabolic process (GO:0008152);; biological process: single-organism process (GO:0044699);; biological process: cellular process (GO:0009987);; cellular component: cell (GO:0005623);; cellular component: cell part (GO:0044464);;
gene19789	2.60276	0.955528	0.933015	LOC107428220	--	--	Cellular Component: plastid (GO:0009536);; Biological Process: mRNA modification (GO:0016556);;	--	--	--	S	Function unknown	PREDICTED: uncharacterized protein LOC103327434 [Prunus mume]	biological process: metabolic process (GO:0008152);; biological process: cellular process (GO:0009987);; cellular component: cell (GO:0005623);; cellular component: cell part (GO:0044464);; cellular component: organelle (GO:0043226);;
gene19806	0.560826	0	0	LOC107428236	--	--	--	--	--	Putative disease resistance RPP13-like protein 1 GN=RPPL1 OS=Arabidopsis thaliana (Mouse-ear cress) PE=3 SV=1	T	Signal transduction mechanisms	NBS-LRR disease resistance-like protein [(Populus tomentosa x Populus bolleana) x Populus tomentosa var. truncata]	--
gene19904	0.932212	0	0.0125533	LOC107428370	--	--	Molecular Function: nucleic acid binding (GO:0003676);; Molecular Function: ATP binding (GO:0005524);; Molecular Function: ATP-dependent helicase activity (GO:0008026);;	K12815|0|pmum:103322043|pre-mRNA-splicing factor ATP-dependent RNA helicase PRP16; K12815 pre-mRNA-splicing factor ATP-dependent RNA helicase DHX38/PRP16 [EC:3.6.4.13] (A)	Spliceosome (ko03040)	Probable pre-mRNA-splicing factor ATP-dependent RNA helicase GN=At3g26560 OS=Arabidopsis thaliana (Mouse-ear cress) PE=1 SV=2	A	RNA processing and modification	PREDICTED: pre-mRNA-splicing factor ATP-dependent RNA helicase PRP16 [Prunus mume]	molecular function: catalytic activity (GO:0003824);; molecular function: binding (GO:0005488);; biological process: single-organism process (GO:0044699);; biological process: metabolic process (GO:0008152);; biological process: cellular process (GO:0009987);;
gene19996	0.993067	0.299278	0.317967	LOC107428491	[R]	General function prediction only	--	K10251|4.18537e-155|pop:POPTR_0010s06240g|POPTRDRAFT_565949; short-chain dehydrogenase/reductase family protein; K10251 17beta-estradiol 17-dehydrogenase / very-long-chain 3-oxoacyl-CoA reductase [EC:1.1.1.62 1.1.1.330] (A)	Fatty acid elongation (ko00062);; Biosynthesis of unsaturated fatty acids (ko01040);; Fatty acid metabolism (ko01212)	Very-long-chain 3-oxoacyl-CoA reductase-like protein At1g24470 GN=KCR2 OS=Arabidopsis thaliana (Mouse-ear cress) PE=2 SV=1	Q	Secondary metabolites biosynthesis, transport and catabolism	short-chain dehydrogenase/reductase family protein [Populus trichocarpa]	--
gene20023	1.01312	0.168368	0.25983	LOC107428434	--	--	--	--	--	--	S	Function unknown	hypothetical protein PRUPE_ppa021991mg [Prunus persica]	--
gene20054	13.4219	1.30594	3.14825	LOC107428524	--	--	--	--	--	High-affinity nitrate transporter 3.2 (Precursor) GN=NRT3.2 OS=Arabidopsis thaliana (Mouse-ear cress) PE=2 SV=1	G	Carbohydrate transport and metabolism	PREDICTED: high-affinity nitrate transporter 3.2-like [Nelumbo nucifera]	--
gene20082	46.2764	18.988	19.8394	LOC107428537	--	--	--	--	--	--	S	Function unknown	PREDICTED: uncharacterized protein LOC103327874 [Prunus mume]	--
gene20089	0.572837	0.270507	0.309445	LOC107428547	[R]	General function prediction only	--	--	--	Ankyrin repeat-containing protein At5g02620 GN=At5g02620 OS=Arabidopsis thaliana (Mouse-ear cress) PE=1 SV=1	R	General function prediction only	Ankyrin repeat-containing protein [Morus notabilis]	--
gene20116	10.4573	4.27458	4.74665	LOC107428566	--	--	--	--	--	--	R	General function prediction only	PREDICTED: uncharacterized protein LOC100246465 [Vitis vinifera]	--
gene2012	6.78515	1.23251	1.81236	LOC107429667	--	--	--	--	--	--	R	General function prediction only	PREDICTED: uncharacterized protein LOC103331271 [Prunus mume]	--
gene20230	1.02035	0.116433	0.267636	LOC107428709	[OC]	Posttranslational modification, protein turnover, chaperones;; Energy production and conversion	Biological Process: pollen tube growth (GO:0009860);; Molecular Function: oxidoreductase activity (GO:0016491);; Biological Process: regulation of cellular process (GO:0050794);;	K17609|0|mdm:103403022|probable nucleoredoxin 1; K17609 nucleoredoxin [EC:1.8.1.8] (A)	--	Probable nucleoredoxin 1 GN=At1g60420 OS=Arabidopsis thaliana (Mouse-ear cress) PE=1 SV=1	O	Posttranslational modification, protein turnover, chaperones	PREDICTED: probable nucleoredoxin 1 [Malus domestica]	biological process: cellular process (GO:0009987);; biological process: growth (GO:0040007);; biological process: cellular component organization or biogenesis (GO:0071840);; biological process: developmental process (GO:0032502);; biological process: single-organism process (GO:0044699);; biological process: reproductive process (GO:0022414);; biological process: metabolic process (GO:0008152);;…
gene20332	3.84535	1.60224	1.307	LOC107428819	[R]	General function prediction only	Biological Process: metabolic process (GO:0008152);; Molecular Function: hydrolase activity (GO:0016787);;	--	--	--	R	General function prediction only	PREDICTED: epoxide hydrolase 3 [Pyrus x bretschneideri]	biological process: metabolic process (GO:0008152);; molecular function: catalytic activity (GO:0003824);;
gene20421	493.147	143.501	239.325	LOC107428898	--	--	Biological Process: response to absence of light (GO:0009646);;	--	--	--	S	Function unknown	PREDICTED: uncharacterized protein LOC105116966 isoform X1 [Populus euphratica]	biological process: response to stimulus (GO:0050896);;
gene20455	0.726901	0.0957702	0.155151	LOC107428945	[T]	Signal transduction mechanisms	Cellular Component: plasma membrane (GO:0005886);; Biological Process: phosphate ion transport (GO:0006817);; Cellular Component: integral component of membrane (GO:0016021);; Biological Process: cellular response to phosphate starvation (GO:0016036);;	--	--	Phosphate transporter PHO1 homolog 10 GN=PHO1-H10 OS=Arabidopsis thaliana (Mouse-ear cress) PE=2 SV=1	P	Inorganic ion transport and metabolism	hypothetical protein PRUPE_ppa014810mg [Prunus persica]	cellular component: cell (GO:0005623);; cellular component: cell part (GO:0044464);; cellular component: membrane (GO:0016020);; cellular component: membrane part (GO:0044425);; biological process: localization (GO:0051179);; biological process: single-organism process (GO:0044699);; biological process: response to stimulus (GO:0050896);; biological process: cellular process (GO:0009987);;
gene208	9.18694	2.80075	2.36547	LOC107427698	--	--	Molecular Function: binding (GO:0005488);;	K17964|5.45169e-72|pper:PRUPE_ppa019758mg|hypothetical protein; K17964 leucine-rich PPR motif-containing protein, mitochondrial (A)	--	Pentatricopeptide repeat-containing protein At5g57250, mitochondrial (Precursor) GN=At5g57250 OS=Arabidopsis thaliana (Mouse-ear cress) PE=2 SV=2	R	General function prediction only	hypothetical protein PRUPE_ppa019758mg [Prunus persica]	molecular function: binding (GO:0005488);;
gene20817	2.65893	1.2896	1.03698	LOC107429342	--	--	--	--	--	Protein WVD2-like 1 GN=WDL1 OS=Arabidopsis thaliana (Mouse-ear cress) PE=1 SV=1	S	Function unknown	PREDICTED: serine/Arginine-related protein 53 isoform X2 [Prunus mume]	--
gene20979	3.7246	1.02971	0.772443	LOC107429519	--	--	--	--	--	Putative leucine-rich repeat receptor-like serine/threonine-protein kinase At2g14440 (Precursor) GN=At2g14440 OS=Arabidopsis thaliana (Mouse-ear cress) PE=3 SV=1	R	General function prediction only	hypothetical protein PRUPE_ppa002857mg [Prunus persica]	--
gene21039	16.5428	5.44324	8.24366	LOC107429555	--	--	--	--	--	Lysine-rich arabinogalactan protein 19 (Precursor) GN=AGP19 OS=Arabidopsis thaliana (Mouse-ear cress) PE=2 SV=2	--	--	hypothetical protein L484_025822 [Morus notabilis]	--
gene21067	1.72008	0.742648	0.751359	LOC107429637	[FJ]	Nucleotide transport and metabolism;; Translation, ribosomal structure and biogenesis	--	--	--	tRNA(adenine(34)) deaminase, chloroplastic (Precursor) GN=TADA OS=Arabidopsis thaliana (Mouse-ear cress) PE=1 SV=1	F	Nucleotide transport and metabolism	tRNA-specific adenosine deaminase [Morus notabilis]	--
gene21329	10.8156	5.25276	5.39076	LOC107429896	--	--	Molecular Function: glutathione peroxidase activity (GO:0004602);; Cellular Component: nucleus (GO:0005634);; Cellular Component: cytosol (GO:0005829);; Biological Process: response to oxidative stress (GO:0006979);; Biological Process: toxin catabolic process (GO:0009407);; Molecular Function: metal ion binding (GO:0046872);; Biological Process: oxidation-reduction process (GO:0055114);;	K00432|1.2152e-103|cmo:103482739|probable glutathione peroxidase 8; K00432 glutathione peroxidase [EC:1.11.1.9] (A)	Glutathione metabolism (ko00480);; Arachidonic acid metabolism (ko00590)	Probable glutathione peroxidase 8 GN=GPX8 OS=Arabidopsis thaliana (Mouse-ear cress) PE=2 SV=1	O	Posttranslational modification, protein turnover, chaperones	glutathione peroxidase [Ziziphus jujuba]	cellular component: organelle (GO:0043226);; cellular component: cell part (GO:0044464);; cellular component: cell (GO:0005623);; molecular function: binding (GO:0005488);; molecular function: catalytic activity (GO:0003824);; molecular function: antioxidant activity (GO:0016209);; biological process: metabolic process (GO:0008152);; biological process: response to stimulus (GO:0050896);; biologi…
gene21367	15.1565	2.72664	3.40236	LOC107429921	--	--	Biological Process: metabolic process (GO:0008152);; Molecular Function: transferase activity, transferring hexosyl groups (GO:0016758);;	--	--	UDP-glycosyltransferase 73B5 GN=UGT73B5 OS=Arabidopsis thaliana (Mouse-ear cress) PE=2 SV=1	CG	Energy production and conversion;; Carbohydrate transport and metabolism	PREDICTED: UDP-glycosyltransferase 73B4-like [Populus euphratica]	biological process: metabolic process (GO:0008152);; molecular function: catalytic activity (GO:0003824);;
gene21435	7.29306	2.93145	3.15562	LOC107430016	[Q]	Secondary metabolites biosynthesis, transport and catabolism	Molecular Function: monooxygenase activity (GO:0004497);; Molecular Function: oxidoreductase activity, acting on paired donors, with incorporation or reduction of molecular oxygen (GO:0016705);; Molecular Function: metal ion binding (GO:0046872);;	--	--	(S)-N-methylcoclaurine 3&apos;-hydroxylase isozyme 1 (Fragment) GN=CYP80B1 OS=Eschscholzia californica (California poppy) PE=2 SV=1	Q	Secondary metabolites biosynthesis, transport and catabolism	hypothetical protein POPTR_0001s08860g [Populus trichocarpa]	molecular function: binding (GO:0005488);; molecular function: catalytic activity (GO:0003824);; biological process: metabolic process (GO:0008152);; biological process: single-organism process (GO:0044699);;
gene21496	6.12025	0.584007	1.15877	LOC107430081	--	--	Biological Process: cellular process (GO:0009987);; Biological Process: developmental process (GO:0032502);; Biological Process: single-organism process (GO:0044699);;	--	--	--	S	Function unknown	hypothetical protein L484_001700 [Morus notabilis]	biological process: single-organism process (GO:0044699);; biological process: developmental process (GO:0032502);; biological process: cellular process (GO:0009987);;
gene21501	2.31731	0.839951	0.672714	LOC107430084	--	--	Molecular Function: copper ion binding (GO:0005507);; Molecular Function: electron carrier activity (GO:0009055);; Cellular Component: anchored component of membrane (GO:0031225);;	--	--	Early nodulin-like protein 1 (Precursor) GN=At2g25060 OS=Arabidopsis thaliana (Mouse-ear cress) PE=1 SV=2	R	General function prediction only	Stellacyanin, putative isoform 1 [Theobroma cacao]	molecular function: electron carrier activity (GO:0009055);; molecular function: binding (GO:0005488);; cellular component: membrane (GO:0016020);; cellular component: membrane part (GO:0044425);;
gene21588	9.16691	2.85732	2.74067	LOC107430210	--	--	Molecular Function: transferase activity (GO:0016740);;	--	--	--	G	Carbohydrate transport and metabolism	PREDICTED: uncharacterized protein LOC100267372 [Vitis vinifera]	biological process: metabolic process (GO:0008152);; molecular function: catalytic activity (GO:0003824);;
gene21595	13.4304	1.77909	2.58655	LOC107430164	[M]	Cell wall/membrane/envelope biogenesis	Molecular Function: polygalacturonase activity (GO:0004650);; Cellular Component: extracellular region (GO:0005576);; Biological Process: carbohydrate metabolic process (GO:0005975);;	--	--	Probable polygalacturonase OS=Vitis vinifera (Grape) PE=1 SV=1	R	General function prediction only	hypothetical protein CISIN_1g011659mg [Citrus sinensis]	biological process: metabolic process (GO:0008152);; molecular function: catalytic activity (GO:0003824);; cellular component: extracellular region (GO:0005576);;
gene21646	17.2442	8.6626	7.78514	LOC107430228	--	--	--	--	--	Disease resistance response protein 206 (Precursor) GN=PI206 OS=Pisum sativum (Garden pea) PE=2 SV=2	R	General function prediction only	PREDICTED: disease resistance response protein 206-like [Nelumbo nucifera]	--
gene21649	3.95536	1.14508	1.33976	LOC107430215	[P]	Inorganic ion transport and metabolism	Cellular Component: late endosome (GO:0005770);; Biological Process: regulation of pH (GO:0006885);; Molecular Function: sodium:proton antiporter activity (GO:0015385);; Cellular Component: integral component of membrane (GO:0016021);; Biological Process: sodium ion transmembrane transport (GO:0035725);;	--	--	Cation/H(+) antiporter 18 GN=CHX18 OS=Arabidopsis thaliana (Mouse-ear cress) PE=2 SV=1	P	Inorganic ion transport and metabolism	PREDICTED: cation/H(+) antiporter 18-like [Prunus mume]	molecular function: transporter activity (GO:0005215);; biological process: localization (GO:0051179);; biological process: single-organism process (GO:0044699);; biological process: cellular process (GO:0009987);; biological process: biological regulation (GO:0065007);; cellular component: membrane part (GO:0044425);; cellular component: membrane (GO:0016020);; cellular component: organelle (GO:…
gene21730	8.43991	4.18029	3.89441	LOC107430319	[R]	General function prediction only	Molecular Function: iron ion binding (GO:0005506);; Cellular Component: peroxisome (GO:0005777);; Molecular Function: oxidoreductase activity, acting on single donors with incorporation of molecular oxygen, incorporation of two atoms of oxygen (GO:0016702);; Molecular Function: flavonol synthase activity (GO:0045431);; Molecular Function: iron-sulfur cluster binding (GO:0051536);; Biological Proc…	K06892|2.2595e-168|fve:101294560|1-aminocyclopropane-1-carboxylate oxidase-like; K06892 feruloyl-CoA ortho-hydroxylase [EC:1.14.11.-] (A)	--	Flavonol synthase/flavanone 3-hydroxylase GN=FLS OS=Malus domestica (Apple) PE=2 SV=1	Q	Secondary metabolites biosynthesis, transport and catabolism	PREDICTED: 1-aminocyclopropane-1-carboxylate oxidase-like [Fragaria vesca subsp. vesca]	biological process: metabolic process (GO:0008152);; biological process: single-organism process (GO:0044699);; molecular function: binding (GO:0005488);; molecular function: catalytic activity (GO:0003824);; cellular component: cell (GO:0005623);; cellular component: cell part (GO:0044464);; cellular component: organelle (GO:0043226);;
gene21732	54.4725	1.1568	1.07912	LOC107430317	[I]	Lipid transport and metabolism	Molecular Function: acyl-CoA dehydrogenase activity (GO:0003995);; Molecular Function: acyl-CoA oxidase activity (GO:0003997);; Cellular Component: peroxisome (GO:0005777);; Biological Process: fatty acid beta-oxidation (GO:0006635);; Molecular Function: flavin adenine dinucleotide binding (GO:0050660);;	K00232|0|cic:CICLE_v10019196mg|hypothetical protein; K00232 acyl-CoA oxidase [EC:1.3.3.6] (A)	Fatty acid degradation (ko00071);; alpha-Linolenic acid metabolism (ko00592);; Biosynthesis of unsaturated fatty acids (ko01040);; Fatty acid metabolism (ko01212);; Peroxisome (ko04146)	Peroxisomal acyl-coenzyme A oxidase 1 GN=ACX1 OS=Arabidopsis thaliana (Mouse-ear cress) PE=1 SV=1	I	Lipid transport and metabolism	PREDICTED: peroxisomal acyl-coenzyme A oxidase 1-like [Nelumbo nucifera]	biological process: cellular process (GO:0009987);; biological process: single-organism process (GO:0044699);; biological process: metabolic process (GO:0008152);; molecular function: binding (GO:0005488);; molecular function: catalytic activity (GO:0003824);; cellular component: organelle (GO:0043226);; cellular component: cell part (GO:0044464);; cellular component: cell (GO:0005623);;
gene21795	2.18309	0.699043	0.896489	LOC107430397	[G]	Carbohydrate transport and metabolism	--	K00851|5.30971e-86|pper:PRUPE_ppa012010mg|hypothetical protein; K00851 gluconokinase [EC:2.7.1.12] (A)	Pentose phosphate pathway (ko00030);; Carbon metabolism (ko01200)	--	G	Carbohydrate transport and metabolism	hypothetical protein PRUPE_ppa012010mg [Prunus persica]	--
gene21816	56.9626	25.0036	31.9598	LOC107430409	--	--	--	--	--	--	S	Function unknown	hypothetical protein L484_023363 [Morus notabilis]	--
gene21841	0.79235	0.103821	0.0690954	LOC107430464	--	--	--	K13457|3.05778e-131|mdm:103441019|disease resistance protein RPM1-like; K13457 disease resistance protein RPM1 (A)	Plant-pathogen interaction (ko04626)	Disease resistance protein RPM1 GN=F17A9.20 OS=Arabidopsis thaliana (Mouse-ear cress) PE=1 SV=1	T	Signal transduction mechanisms	Disease resistance protein RPM1 [Morus notabilis]	--
gene21876	7.92013	2.88692	2.91836	LOC107430487	[Q]	Secondary metabolites biosynthesis, transport and catabolism	Molecular Function: oxidoreductase activity (GO:0016491);; Molecular Function: metal ion binding (GO:0046872);;	K04123|0|cam:101498233|beta-amyrin 11-oxidase-like; K04123 ent-kaurenoic acid hydroxylase [EC:1.14.13.79] (A)	Diterpenoid biosynthesis (ko00904)	Beta-amyrin 11-oxidase GN=CYP88D6 OS=Glycyrrhiza uralensis (Chinese licorice) PE=1 SV=1	Q	Secondary metabolites biosynthesis, transport and catabolism	PREDICTED: beta-amyrin 11-oxidase-like [Cicer arietinum]	biological process: metabolic process (GO:0008152);; molecular function: catalytic activity (GO:0003824);; molecular function: binding (GO:0005488);;
gene21878	168.527	53.2106	68.4793	LOC107430491	[Q]	Secondary metabolites biosynthesis, transport and catabolism	Molecular Function: oxidoreductase activity (GO:0016491);; Molecular Function: metal ion binding (GO:0046872);;	K04123|0|mtr:MTR_5g014250|Cytochrome P450 ent-kaurenoic acid oxidase; K04123 ent-kaurenoic acid hydroxylase [EC:1.14.13.79] (A)	Diterpenoid biosynthesis (ko00904)	Beta-amyrin 11-oxidase GN=CYP88D6 OS=Glycyrrhiza uralensis (Chinese licorice) PE=1 SV=1	Q	Secondary metabolites biosynthesis, transport and catabolism	PREDICTED: beta-amyrin 11-oxidase-like [Glycine max]	biological process: metabolic process (GO:0008152);; molecular function: binding (GO:0005488);; molecular function: catalytic activity (GO:0003824);;
gene21950	46.5543	20.7341	21.6067	LOC107430564	--	--	--	--	--	Putative gamma-glutamylcyclotransferase At3g02910 GN=At3g02910 OS=Arabidopsis thaliana (Mouse-ear cress) PE=2 SV=2	S	Function unknown	PREDICTED: putative gamma-glutamylcyclotransferase At3g02910 [Prunus mume]	--
gene21952	10.1357	3.55907	5.7155	LOC107430595	--	--	--	--	--	--	S	Function unknown	PREDICTED: uncharacterized protein LOC103452948 [Malus domestica]	--
gene21970	60.7831	3.86453	4.59475	LOC107430548	[R]	General function prediction only	Molecular Function: nucleotide binding (GO:0000166);; Molecular Function: nucleic acid binding (GO:0003676);;	--	--	Serine/arginine-rich splicing factor SR45a GN=F22G5.31 OS=Arabidopsis thaliana (Mouse-ear cress) PE=1 SV=1	K	Transcription	hypothetical protein JCGZ_08531 [Jatropha curcas]	molecular function: binding (GO:0005488);;
gene22057	10.8438	2.6753	2.68442	LOC107430689	--	--	Biological Process: microtubule cytoskeleton organization (GO:0000226);; Biological Process: protein peptidyl-prolyl isomerization (GO:0000413);; Biological Process: cytokinesis by cell plate formation (GO:0000911);; Molecular Function: peptidyl-prolyl cis-trans isomerase activity (GO:0003755);; Cellular Component: endoplasmic reticulum (GO:0005783);; Cellular Component: cytosol (GO:0005829);; Bi…	--	--	Peptidyl-prolyl cis-trans isomerase PASTICCINO1 GN=F5K20.310 OS=Arabidopsis thaliana (Mouse-ear cress) PE=1 SV=2	O	Posttranslational modification, protein turnover, chaperones	unknown [Glycine max]	molecular function: catalytic activity (GO:0003824);; biological process: multicellular organismal process (GO:0032501);; biological process: response to stimulus (GO:0050896);; biological process: cellular process (GO:0009987);; biological process: growth (GO:0040007);; biological process: cellular component organization or biogenesis (GO:0071840);; biological process: developmental process (GO:…
gene22157	3.68387	0	0	LOC107430795	[IQR]	Lipid transport and metabolism;; Secondary metabolites biosynthesis, transport and catabolism;; General function prediction only	--	K08081|2.7031e-114|cit:102615694|tropinone reductase homolog; K08081 Tropinone reductase 1 [EC:1.1.1.206] (A)	Tropane, piperidine and pyridine alkaloid biosynthesis (ko00960)	Tropinone reductase homolog OS=Datura stramonium (Jimsonweed) PE=2 SV=1	Q	Secondary metabolites biosynthesis, transport and catabolism	PREDICTED: tropinone reductase homolog [Citrus sinensis]	--
gene22186	30.2917	0.380656	0.349914	LOC107430839	[P]	Inorganic ion transport and metabolism	--	K07300|7.18981e-40|gmx:100779440|vacuolar cation/proton exchanger 3-like; K07300 Ca2+:H+ antiporter (A)	--	Vacuolar cation/proton exchanger 3 GN=CAX3 OS=Arabidopsis thaliana (Mouse-ear cress) PE=1 SV=1	P	Inorganic ion transport and metabolism	PREDICTED: vacuolar cation/proton exchanger 3-like [Glycine max]	--
gene2220	12.7948	4.72575	6.82138	LOC107431359	[GEPR]	Carbohydrate transport and metabolism;; Amino acid transport and metabolism;; Inorganic ion transport and metabolism;; General function prediction only	--	K08202|0|fve:101296978|organic cation/carnitine transporter 4-like; K08202 MFS transporter, OCT family, solute carrier family 22 (organic cation transporter), member 4/5 (A)	--	Organic cation/carnitine transporter 4 GN=F3H11.5 OS=Arabidopsis thaliana (Mouse-ear cress) PE=2 SV=1	R	General function prediction only	PREDICTED: organic cation/carnitine transporter 4-like [Fragaria vesca subsp. vesca]	--
gene22385	2.81273	1.08715	1.09455	LOC107431063	--	--	--	--	--	Serine/threonine-protein phosphatase 7 long form homolog GN=At1g48120 OS=Arabidopsis thaliana (Mouse-ear cress) PE=2 SV=1	S	Function unknown	PREDICTED: uncharacterized protein LOC100267140 [Vitis vinifera]	--
gene22443	21.331	5.12486	6.04872	LOC107431121	[S]	Function unknown	--	--	--	--	S	Function unknown	hypothetical protein L484_021338 [Morus notabilis]	--
gene22494	19.3594	8.45182	11.9447	LOC107431164	--	--	Cellular Component: membrane (GO:0016020);;	--	--	Probable purine permease 9 GN=PUP9 OS=Arabidopsis thaliana (Mouse-ear cress) PE=2 SV=2	G	Carbohydrate transport and metabolism	hypothetical protein L484_017773 [Morus notabilis]	cellular component: membrane (GO:0016020);;
gene22517	0.700024	0	0	LOC107431176	[S]	Function unknown	--	--	--	Putative disease resistance protein RGA3 GN=RGA3 OS=Solanum bulbocastanum (Wild potato) PE=2 SV=2	T	Signal transduction mechanisms	Putative disease resistance protein RGA3 [Morus notabilis]	--
gene22540	0.51127	0	0.00619903	LOC107431191	--	--	--	--	--	TMV resistance protein N GN=N OS=Nicotiana glutinosa (Tobacco) PE=1 SV=1	T	Signal transduction mechanisms	PREDICTED: TMV resistance protein N-like [Malus domestica]	--
gene22592	0.634632	0.278535	0.327509	LOC107431285	--	--	Molecular Function: ubiquitin-protein transferase activity (GO:0004842);; Biological Process: ubiquitin-dependent protein catabolic process (GO:0006511);; Biological Process: toxin catabolic process (GO:0009407);; Biological Process: protein ubiquitination (GO:0016567);;	K10268|0|pmum:103342914|F-box/LRR-repeat protein 3; K10268 F-box and leucine-rich repeat protein 2/20 (A)	--	F-box/LRR-repeat protein 3 GN=FBL3 OS=Arabidopsis thaliana (Mouse-ear cress) PE=2 SV=1	R	General function prediction only	PREDICTED: F-box/LRR-repeat protein 3 [Prunus mume]	biological process: single-organism process (GO:0044699);; biological process: metabolic process (GO:0008152);; biological process: cellular process (GO:0009987);; molecular function: catalytic activity (GO:0003824);;
gene22702	1.32839	0	0	LOC107431417	[RTKL]	General function prediction only;; Signal transduction mechanisms;; Transcription;; Replication, recombination and repair	--	--	--	Serine/threonine-protein kinase At5g01020 GN=At5g01020 OS=Arabidopsis thaliana (Mouse-ear cress) PE=1 SV=1	T	Signal transduction mechanisms	PREDICTED: serine/threonine-protein kinase At5g01020 [Prunus mume]	--
gene22712	4.80849	0.403982	0.847943	LOC107431405	--	--	--	--	--	--	S	Function unknown	hypothetical protein PRUPE_ppa011610mg [Prunus persica]	--
gene22748	0.745041	0.116366	0.129175	LOC107431433	--	--	Cellular Component: nuclear envelope (GO:0005635);; Biological Process: mitotic spindle assembly checkpoint (GO:0007094);; Biological Process: gravitropism (GO:0009630);;	K06638|0|pper:PRUPE_ppa002095mg|hypothetical protein; K06638 mitotic spindle assembly checkpoint protein MAD1 (A)	--	Mitotic spindle checkpoint protein MAD1 {ECO:0000303|PubMed:22457071} OS=Arabidopsis thaliana (Mouse-ear cress) PE=1 SV=1	D	Cell cycle control, cell division, chromosome partitioning	hypothetical protein PRUPE_ppa002095mg [Prunus persica]	cellular component: organelle part (GO:0044422);; cellular component: organelle (GO:0043226);; cellular component: cell (GO:0005623);; cellular component: cell part (GO:0044464);; biological process: cellular process (GO:0009987);; biological process: biological regulation (GO:0065007);; biological process: single-organism process (GO:0044699);; biological process: response to stimulus (GO:005089…
gene22751	2.41304	0.995698	1.16802	LOC107431437	[O]	Posttranslational modification, protein turnover, chaperones	Molecular Function: nucleotide binding (GO:0000166);; Molecular Function: hydrolase activity (GO:0016787);; Biological Process: protein metabolic process (GO:0019538);;	K03544|0|pmum:103318949|ATP-dependent Clp protease ATP-binding subunit clpX-like, mitochondrial; K03544 ATP-dependent Clp protease ATP-binding subunit ClpX (A)	--	ATP-dependent zinc metalloprotease FTSH, chloroplastic (Precursor; Fragment) GN=FTSH OS=Capsicum annuum (Bell pepper) PE=2 SV=1	O	Posttranslational modification, protein turnover, chaperones	PREDICTED: ATP-dependent Clp protease ATP-binding subunit clpX-like, mitochondrial [Prunus mume]	biological process: metabolic process (GO:0008152);; molecular function: binding (GO:0005488);; molecular function: catalytic activity (GO:0003824);;
gene22758	0.863289	0.335882	0.310809	LOC107431461	--	--	--	--	--	Putative disease resistance RPP13-like protein 2 GN=RPP13L2 OS=Arabidopsis thaliana (Mouse-ear cress) PE=3 SV=1	T	Signal transduction mechanisms	Disease resistance protein RPM1, putative [Ricinus communis]	--
gene22838	79.6419	29.2388	32.6375	LOC107431514	[Q]	Secondary metabolites biosynthesis, transport and catabolism	--	--	--	Geraniol 8-hydroxylase GN=CYP76B6 OS=Catharanthus roseus (Madagascar periwinkle) PE=1 SV=1	Q	Secondary metabolites biosynthesis, transport and catabolism	Cytochrome P450 76C4 [Morus notabilis]	--
gene2288	0.842605	0.414694	0.561857	LOC107431816	[Q]	Secondary metabolites biosynthesis, transport and catabolism	Molecular Function: monooxygenase activity (GO:0004497);; Molecular Function: iron ion binding (GO:0005506);; Molecular Function: electron carrier activity (GO:0009055);; Molecular Function: oxidoreductase activity, acting on paired donors, with incorporation or reduction of molecular oxygen (GO:0016705);; Molecular Function: heme binding (GO:0020037);; Biological Process: oxidation-reduction pro…	K07437|0|pmum:103326515|cytochrome P450 716B1-like; K07437 cytochrome P450, family 26, subfamily A (A)	--	Cytochrome P450 716B1 GN=CYP716B1 OS=Picea sitchensis (Sitka spruce) PE=2 SV=1	Q	Secondary metabolites biosynthesis, transport and catabolism	PREDICTED: cytochrome P450 716B1-like [Prunus mume]	molecular function: binding (GO:0005488);; molecular function: catalytic activity (GO:0003824);; molecular function: electron carrier activity (GO:0009055);; biological process: metabolic process (GO:0008152);; biological process: single-organism process (GO:0044699);;
gene230	12.884	2.40451	2.08692	LOC107430756	--	--	--	--	--	--	S	Function unknown	PREDICTED: uncharacterized protein At1g04910-like isoform X2 [Vitis vinifera]	--
gene23069	6.14109	2.65313	2.55541	LOC107431810	--	--	--	K14484|3.24931e-166|pmum:103340885|auxin-responsive protein IAA27; K14484 auxin-responsive protein IAA (A)	Plant hormone signal transduction (ko04075)	Auxin-responsive protein IAA27 GN=F19B15.110 OS=Arabidopsis thaliana (Mouse-ear cress) PE=1 SV=1	S	Function unknown	PREDICTED: auxin-responsive protein IAA27 [Prunus mume]	--
gene23070	6.1265	2.74674	3.2615	LOC107431809	[ER]	Amino acid transport and metabolism;; General function prediction only	--	K18914|0|pmum:103340886|NADPH:adrenodoxin oxidoreductase, mitochondrial; K18914 adrenodoxin-NADP+ reductase [EC:1.18.1.6] (A)	--	NADPH:adrenodoxin oxidoreductase, mitochondrial (Precursor) OS=Arabidopsis thaliana (Mouse-ear cress) PE=1 SV=1	C	Energy production and conversion	PREDICTED: NADPH:adrenodoxin oxidoreductase, mitochondrial [Prunus mume]	--
gene23073	2.23715	0.850631	0.981542	LOC107431754	[R]	General function prediction only	--	--	--	Putative E3 ubiquitin-protein ligase LIN-1 {ECO:0000250|UniProtKB:D1FP53} OS=Lotus japonicus (Lotus corniculatus var. japonicus) PE=2 SV=2	R	General function prediction only	PREDICTED: putative E3 ubiquitin-protein ligase LIN-1 [Pyrus x bretschneideri]	--
gene23149	1245.66	544.739	539.922	LOC107431962	[G]	Carbohydrate transport and metabolism	Molecular Function: transporter activity (GO:0005215);; Biological Process: transport (GO:0006810);; Cellular Component: integral component of membrane (GO:0016021);;	K09873|2.17896e-140|tcc:TCM_022298|Aquaporin TIP1,6; K09873 aquaporin TIP (A)	--	Aquaporin TIP1-1, N-terminally processed GN=T1J8.1 OS=Arabidopsis thaliana (Mouse-ear cress) PE=1 SV=1	G	Carbohydrate transport and metabolism	tonoplast intrinsic protein [Gossypium hirsutum]	cellular component: membrane part (GO:0044425);; cellular component: membrane (GO:0016020);; molecular function: transporter activity (GO:0005215);; biological process: localization (GO:0051179);;
gene23159	207.772	99.4276	100.028	LOC107431966	--	--	Cellular Component: integral component of membrane (GO:0016021);; Biological Process: transmembrane transport (GO:0055085);;	--	--	--	R	General function prediction only	PREDICTED: uncharacterized protein LOC100248651 [Vitis vinifera]	cellular component: membrane part (GO:0044425);; cellular component: membrane (GO:0016020);; biological process: cellular process (GO:0009987);; biological process: single-organism process (GO:0044699);; biological process: localization (GO:0051179);;
gene23341	66.0153	30.0115	30.265	LOC107432096	--	--	--	K10740|5.77724e-61|pper:PRUPE_ppa012221mg|hypothetical protein; K10740 replication factor A3 (A)	DNA replication (ko03030);; Nucleotide excision repair (ko03420);; Mismatch repair (ko03430);; Homologous recombination (ko03440)	Replication protein A 14 kDa subunit B GN=F28J12.250 OS=Arabidopsis thaliana (Mouse-ear cress) PE=1 SV=1	L	Replication, recombination and repair	hypothetical protein PRUPE_ppa012221mg [Prunus persica]	--
gene23349	16.9688	6.59071	7.10922	LOC107432075	--	--	--	--	--	--	S	Function unknown	hypothetical protein PRUPE_ppa005088mg [Prunus persica]	--
gene23350	27.3598	4.90285	4.00102	LOC107432080	--	--	--	--	--	--	S	Function unknown	hypothetical protein POPTR_0016s07860g [Populus trichocarpa]	--
gene23402	13.8363	5.98166	7.86587	LOC107432154	--	--	--	--	--	Phytosulfokine-beta (Precursor) GN=T32N15.2 OS=Arabidopsis thaliana (Mouse-ear cress) PE=2 SV=2	R	General function prediction only	Putative phytosulfokines 6 [Morus notabilis]	--
gene23619	159.441	47.2134	65.6395	LOC107432383	--	--	Biological Process: fatty acid biosynthetic process (GO:0006633);; Cellular Component: membrane (GO:0016020);; Molecular Function: transferase activity, transferring acyl groups other than amino-acyl groups (GO:0016747);;	K15397|0|cit:102609752|3-ketoacyl-CoA synthase 11-like; K15397 3-ketoacyl-CoA synthase [EC:2.3.1.199] (A)	Fatty acid elongation (ko00062)	3-ketoacyl-CoA synthase 11 GN=KCS11 OS=Arabidopsis thaliana (Mouse-ear cress) PE=2 SV=1	I	Lipid transport and metabolism	hypothetical protein CISIN_1g008975mg [Citrus sinensis]	molecular function: catalytic activity (GO:0003824);; biological process: metabolic process (GO:0008152);; biological process: single-organism process (GO:0044699);; biological process: cellular process (GO:0009987);; cellular component: membrane (GO:0016020);;
gene23672	55.4299	14.8546	10.735	LOC107432435	--	--	Molecular Function: adenyl nucleotide binding (GO:0030554);;	--	--	CBS domain-containing protein CBSX5 GN=CBSX5 OS=Arabidopsis thaliana (Mouse-ear cress) PE=2 SV=2	S	Function unknown	Cystathionine beta-synthase family protein isoform 1 [Theobroma cacao]	molecular function: binding (GO:0005488);;
gene23699	1.40802	0.463774	0.491252	LOC107432515	--	--	Cellular Component: cytosolic ribosome (GO:0022626);;	--	--	Putative pentatricopeptide repeat-containing protein At3g15200 GN=At3g15200 OS=Arabidopsis thaliana (Mouse-ear cress) PE=3 SV=1	R	General function prediction only	PREDICTED: putative pentatricopeptide repeat-containing protein At3g15200 [Pyrus x bretschneideri]	cellular component: macromolecular complex (GO:0032991);; cellular component: organelle (GO:0043226);; cellular component: cell part (GO:0044464);; cellular component: cell (GO:0005623);;
gene23737	7.3057	2.37979	2.34548	LOC107432476	[P]	Inorganic ion transport and metabolism	Molecular Function: DNA binding (GO:0003677);; Biological Process: regulation of DNA replication (GO:0006275);; Biological Process: sulfide oxidation, using siroheme sulfite reductase (GO:0019424);; Molecular Function: heme binding (GO:0020037);; Cellular Component: chloroplast nucleoid (GO:0042644);; Biological Process: negative regulation of transcription, DNA-templated (GO:0045892);; Molecular…	K00392|1.60254e-106|gmx:100790764|sulfite reductase [ferredoxin], chloroplastic-like; K00392 sulfite reductase (ferredoxin) [EC:1.8.7.1] (A)	Sulfur metabolism (ko00920)	Sulfite reductase [ferredoxin], chloroplastic (Precursor; Fragment) GN=SIR OS=Glycine max (Soybean) PE=1 SV=1	P	Inorganic ion transport and metabolism	RecName: Full=Sulfite reductase [ferredoxin], chloroplastic; Short=GmSiR; AltName: Full=Nucleoid DNA-compacting protein of 68 kDa; Flags: Precursor, partial [Glycine max]	cellular component: cell part (GO:0044464);; cellular component: nucleoid (GO:0009295);; cellular component: cell (GO:0005623);; cellular component: organelle (GO:0043226);; cellular component: organelle part (GO:0044422);; molecular function: catalytic activity (GO:0003824);; molecular function: binding (GO:0005488);; biological process: cellular process (GO:0009987);; biological process: biolog…
gene23761	3.98047	0.976248	1.30255	LOC107432505	[M]	Cell wall/membrane/envelope biogenesis	Molecular Function: UDP-N-acetylglucosamine 1-carboxyvinyltransferase activity (GO:0008760);; Biological Process: UDP-N-acetylgalactosamine biosynthetic process (GO:0019277);;	--	--	--	R	General function prediction only	PREDICTED: uncharacterized protein LOC103326099 [Prunus mume]	biological process: single-organism process (GO:0044699);; biological process: metabolic process (GO:0008152);; biological process: cellular process (GO:0009987);; molecular function: catalytic activity (GO:0003824);;
gene23765	128.832	34.0814	39.1258	LOC107432540	[C]	Energy production and conversion	Cellular Component: cytosol (GO:0005829);; Biological Process: tricarboxylic acid cycle (GO:0006099);; Molecular Function: phosphoenolpyruvate carboxylase activity (GO:0008964);; Biological Process: carbon fixation (GO:0015977);; Molecular Function: 2-alkenal reductase [NAD(P)] activity (GO:0032440);; Cellular Component: apoplast (GO:0048046);;	K01595|0|cmo:103501810|phosphoenolpyruvate carboxylase, housekeeping isozyme; K01595 phosphoenolpyruvate carboxylase [EC:4.1.1.31] (A)	Pyruvate metabolism (ko00620);; Carbon fixation in photosynthetic organisms (ko00710);; Carbon metabolism (ko01200)	Phosphoenolpyruvate carboxylase, housekeeping isozyme GN=PPC16 OS=Glycine max (Soybean) PE=1 SV=1	C	Energy production and conversion	Phosphoenolpyruvate carboxylase, housekeeping isozyme [Morus notabilis]	cellular component: extracellular region (GO:0005576);; cellular component: cell (GO:0005623);; cellular component: cell part (GO:0044464);; molecular function: catalytic activity (GO:0003824);; biological process: single-organism process (GO:0044699);; biological process: metabolic process (GO:0008152);; biological process: cellular process (GO:0009987);;
gene23783	10.6723	2.22098	2.6872	LOC107432571	--	--	--	--	--	Pathogen-related protein OS=Hordeum vulgare (Barley) PE=2 SV=2	S	Function unknown	PREDICTED: pathogen-related protein-like [Populus euphratica]	--
gene23904	12.5468	3.2952	4.1722	LOC107432703	[Z]	Cytoskeleton	Molecular Function: GTPase activity (GO:0003924);; Molecular Function: structural constituent of cytoskeleton (GO:0005200);; Molecular Function: GTP binding (GO:0005525);; Cellular Component: cell wall (GO:0005618);; Cellular Component: cytosol (GO:0005829);; Cellular Component: microtubule (GO:0005874);; Cellular Component: plasma membrane (GO:0005886);; Biological Process: GTP catabolic process…	K07374|0|zma:542582|tua6, TUBA6; alpha tubulin6; K07374 tubulin alpha (A)	Phagosome (ko04145)	Tubulin alpha-6 chain GN=TUBA6 OS=Zea mays (Maize) PE=2 SV=1	Z	Cytoskeleton	tubulin alpha-6 chain [Zea mays]	molecular function: catalytic activity (GO:0003824);; molecular function: binding (GO:0005488);; molecular function: structural molecule activity (GO:0005198);; biological process: single-organism process (GO:0044699);; biological process: response to stimulus (GO:0050896);; biological process: metabolic process (GO:0008152);; biological process: cellular process (GO:0009987);; biological process…
gene23927	84.0458	41.9455	41.6547	LOC107432723	--	--	Cellular Component: cell part (GO:0044464);;	--	--	--	R	General function prediction only	hypothetical protein PRUPE_ppa010934mg [Prunus persica]	cellular component: cell part (GO:0044464);;
gene23945	9.8706	0.280307	0.162777	LOC107432742	[Q]	Secondary metabolites biosynthesis, transport and catabolism	Molecular Function: oxidoreductase activity (GO:0016491);; Molecular Function: metal ion binding (GO:0046872);;	--	--	Cytochrome P450 CYP72A219 OS=Panax ginseng (Korean ginseng) PE=2 SV=1	Q	Secondary metabolites biosynthesis, transport and catabolism	Secologanin synthase [Morus notabilis]	biological process: metabolic process (GO:0008152);; molecular function: binding (GO:0005488);; molecular function: catalytic activity (GO:0003824);;
gene23998	60.9325	0.161536	0.238656	LOC107432786	[E]	Amino acid transport and metabolism	Molecular Function: gamma-glutamyltransferase activity (GO:0003840);; Cellular Component: vacuole (GO:0005773);; Biological Process: glutathione catabolic process (GO:0006751);; Molecular Function: glutathione gamma-glutamylcysteinyltransferase activity (GO:0016756);;	K18592|0|pper:PRUPE_ppa002923mg|hypothetical protein; K18592 gamma-glutamyltranspeptidase / glutathione hydrolase / leukotriene-C4 hydrolase [EC:2.3.2.2 3.4.19.13 3.4.19.14] (A)	Taurine and hypotaurine metabolism (ko00430);; Cyanoamino acid metabolism (ko00460);; Glutathione metabolism (ko00480);; Arachidonic acid metabolism (ko00590)	Gamma-glutamyltranspeptidase 3 GN=F17A13.30 OS=Arabidopsis thaliana (Mouse-ear cress) PE=2 SV=1	E	Amino acid transport and metabolism	Gamma-glutamyltranspeptidase 1 [Morus notabilis]	biological process: cellular process (GO:0009987);; biological process: metabolic process (GO:0008152);; biological process: single-organism process (GO:0044699);; molecular function: catalytic activity (GO:0003824);; cellular component: organelle (GO:0043226);; cellular component: cell (GO:0005623);; cellular component: cell part (GO:0044464);;
gene24011	8.14597	3.88413	4.94395	LOC107432835	--	--	Molecular Function: acid phosphatase activity (GO:0003993);;	--	--	Acid phosphatase 1 (Precursor) GN=APS1 OS=Solanum lycopersicum (Tomato) PE=2 SV=1	R	General function prediction only	Acid phosphatase 1 [Morus notabilis]	biological process: cellular process (GO:0009987);; biological process: metabolic process (GO:0008152);; molecular function: catalytic activity (GO:0003824);;
gene24024	7.08345	2.93339	3.98449	LOC107432834	--	--	--	K01301|0|cic:CICLE_v10007621mg|hypothetical protein; K01301 N-acetylated-alpha-linked acidic dipeptidase [EC:3.4.17.21] (A)	--	Probable glutamate carboxypeptidase 2 GN=AMP1 OS=Arabidopsis thaliana (Mouse-ear cress) PE=1 SV=3	OP	Posttranslational modification, protein turnover, chaperones;; Inorganic ion transport and metabolism	hypothetical protein CICLE_v10007621mg [Citrus clementina]	--
gene24084	2.38281	1.09256	1.29047	LOC107432900	--	--	--	--	--	--	S	Function unknown	PREDICTED: uncharacterized protein LOC103435447 [Malus domestica]	--
gene24142	6.64662	2.18965	1.81538	LOC107432956	--	--	Molecular Function: binding (GO:0005488);; Biological Process: transcription, DNA-templated (GO:0006351);;	--	--	Agamous-like MADS-box protein AGL61 GN=F27C12.24 OS=Arabidopsis thaliana (Mouse-ear cress) PE=1 SV=1	K	Transcription	hypothetical protein CICLE_v10022548mg [Citrus clementina]	biological process: metabolic process (GO:0008152);; biological process: cellular process (GO:0009987);; molecular function: binding (GO:0005488);;
gene24146	20.4251	8.58113	8.21629	LOC107432968	--	--	Molecular Function: binding (GO:0005488);; Biological Process: transcription, DNA-templated (GO:0006351);;	--	--	Agamous-like MADS-box protein AGL61 GN=F27C12.24 OS=Arabidopsis thaliana (Mouse-ear cress) PE=1 SV=1	K	Transcription	hypothetical protein CICLE_v10022548mg [Citrus clementina]	biological process: metabolic process (GO:0008152);; biological process: cellular process (GO:0009987);; molecular function: binding (GO:0005488);;
gene24248	37.3128	16.0836	23.4128	LOC107433085	--	--	--	--	--	Protein PHLOEM PROTEIN 2-LIKE A9 GN=PP2A9 OS=Arabidopsis thaliana (Mouse-ear cress) PE=2 SV=1	R	General function prediction only	PREDICTED: protein PHLOEM PROTEIN 2-LIKE A9-like [Citrus sinensis]	--
gene24253	1.11229	0.222467	0.439694	LOC107433092	--	--	Cellular Component: Golgi apparatus (GO:0005794);; Biological Process: plant-type secondary cell wall biogenesis (GO:0009834);; Biological Process: glucuronoxylan biosynthetic process (GO:0010417);; Molecular Function: galactosylgalactosylxylosylprotein 3-beta-glucuronosyltransferase activity (GO:0015018);; Cellular Component: membrane (GO:0016020);; Molecular Function: xylosyltransferase activit…	--	--	Probable beta-1,4-xylosyltransferase IRX9 GN=IRX9 OS=Arabidopsis thaliana (Mouse-ear cress) PE=2 SV=1	O	Posttranslational modification, protein turnover, chaperones	secondary cell wall-related glycosyltransferase family 43 [Populus tremula x Populus tremuloides]	cellular component: membrane (GO:0016020);; cellular component: organelle (GO:0043226);; cellular component: cell part (GO:0044464);; cellular component: cell (GO:0005623);; biological process: cellular process (GO:0009987);; biological process: cellular component organization or biogenesis (GO:0071840);; biological process: single-organism process (GO:0044699);; biological process: metabolic pro…
gene24304	1.75427	0.269454	0.480102	LOC107433139	[V]	Defense mechanisms	--	K03327|1.05054e-177|pvu:PHAVU_009G250100g|hypothetical protein; K03327 multidrug resistance protein, MATE family (A)	--	MATE efflux family protein 5 GN=F3L12.12 OS=Arabidopsis thaliana (Mouse-ear cress) PE=3 SV=1	R	General function prediction only	hypothetical protein PHAVU_009G250100g [Phaseolus vulgaris]	--
gene24602	8.38355	0.595466	0.590478	LOC107433475	--	--	--	--	--	14 kDa proline-rich protein DC2.15 (Precursor) OS=Daucus carota (Wild carrot) PE=2 SV=1	R	General function prediction only	PREDICTED: 14 kDa proline-rich protein DC2.15-like [Fragaria vesca subsp. vesca]	--
gene24703	10.5076	1.43812	2.28702	LOC107433650	[V]	Defense mechanisms	Molecular Function: ATP binding (GO:0005524);; Cellular Component: plasma membrane (GO:0005886);; Biological Process: ATP catabolic process (GO:0006200);; Molecular Function: molybdate transmembrane-transporting ATPase activity (GO:0015412);;	--	--	ABC transporter G family member 22 GN=F15M7.6 OS=Arabidopsis thaliana (Mouse-ear cress) PE=1 SV=1	Q	Secondary metabolites biosynthesis, transport and catabolism	ABC transporter G family member 22 [Morus notabilis]	biological process: single-organism process (GO:0044699);; biological process: metabolic process (GO:0008152);; biological process: localization (GO:0051179);; biological process: cellular process (GO:0009987);; molecular function: catalytic activity (GO:0003824);; molecular function: binding (GO:0005488);; molecular function: transporter activity (GO:0005215);; cellular component: cell (GO:00056…
gene24715	1.39464	0.634371	0.71884	LOC107433635	--	--	--	--	--	Protein WAVE-DAMPENED 2 GN=WVD2 OS=Arabidopsis thaliana (Mouse-ear cress) PE=2 SV=1	S	Function unknown	PREDICTED: nucleolar and coiled-body phosphoprotein 1 [Prunus mume]	--
gene2488	10.7798	3.66677	4.95437	LOC107433734	--	--	--	--	--	Fasciclin-like arabinogalactan protein 1 (Precursor) GN=FLA1 OS=Arabidopsis thaliana (Mouse-ear cress) PE=1 SV=1	R	General function prediction only	PREDICTED: fasciclin-like arabinogalactan protein 1-like [Fragaria vesca subsp. vesca]	--
gene24916	2.70087	0.106932	0.160198	LOC107433812	--	--	--	--	--	--	R	General function prediction only	Zinc finger CCCH domain-containing protein 38 [Morus notabilis]	--
gene24956	3.89398	1.8488	1.68706	LOC107433905	[J]	Translation, ribosomal structure and biogenesis	--	--	--	Ribonuclease E/G-like protein, chloroplastic (Precursor) GN=T23O15.10 OS=Arabidopsis thaliana (Mouse-ear cress) PE=1 SV=1	R	General function prediction only	PREDICTED: ribonuclease E/G-like protein, chloroplastic isoform X1 [Prunus mume]	--
gene25082	3.86515	0	0.0284543	LOC107433993	--	--	Molecular Function: oxidoreductase activity, acting on paired donors, with incorporation or reduction of molecular oxygen, 2-oxoglutarate as one donor, and incorporation of one atom each of oxygen into both donors (GO:0016706);; Biological Process: oxidation-reduction process (GO:0055114);;	K10765|0|cit:102609025|alpha-ketoglutarate-dependent dioxygenase alkB-like; K10765 alkylated DNA repair protein alkB homolog 1 [EC:1.14.11.- 4.2.99.18] (A)	--	Alpha-ketoglutarate-dependent dioxygenase alkB GN=At1g11780 OS=Arabidopsis thaliana (Mouse-ear cress) PE=2 SV=2	A	RNA processing and modification	PREDICTED: alpha-ketoglutarate-dependent dioxygenase alkB-like [Citrus sinensis]	molecular function: catalytic activity (GO:0003824);; biological process: metabolic process (GO:0008152);; biological process: single-organism process (GO:0044699);;
gene25139	9.35204	0.0682613	0.572202	LOC107434071	--	--	--	--	--	O-acyltransferase WSD1 GN=WSD1 OS=Arabidopsis thaliana (Mouse-ear cress) PE=2 SV=1	S	Function unknown	hypothetical protein PRUPE_ppa015879mg [Prunus persica]	--
gene25149	10.0547	4.82174	3.97074	LOC107434076	[G]	Carbohydrate transport and metabolism	Molecular Function: hydrolase activity, hydrolyzing O-glycosyl compounds (GO:0004553);; Biological Process: carbohydrate metabolic process (GO:0005975);;	--	--	Mannan endo-1,4-beta-mannosidase 2 (Precursor) GN=MAN2 OS=Arabidopsis thaliana (Mouse-ear cress) PE=2 SV=1	R	General function prediction only	hypothetical protein PRUPE_ppa005783mg [Prunus persica]	biological process: metabolic process (GO:0008152);; molecular function: catalytic activity (GO:0003824);;
gene25337	11.4648	0.0330974	0.0410706	LOC107434283	[R]	General function prediction only	--	K17908|0|pper:PRUPE_ppa007369mg|hypothetical protein; K17908 autophagy-related protein 18 (A)	--	Autophagy-related protein 18b GN=ATG18B OS=Arabidopsis thaliana (Mouse-ear cress) PE=2 SV=2	R	General function prediction only	PREDICTED: autophagy-related protein 18b isoform X2 [Prunus mume]	--
gene25398	16.6604	0.0213348	0.0305326	LOC107434352	--	--	--	K10293|6.40454e-92|pmum:103335044|F-box protein SKIP22-like; K10293 F-box protein 7 (A)	--	F-box protein SKIP22 GN=SKIP22 OS=Arabidopsis thaliana (Mouse-ear cress) PE=1 SV=1	R	General function prediction only	PREDICTED: F-box protein SKIP22-like [Prunus mume]	--
gene25401	1.381	0.509539	0.746194	LOC107434351	[S]	Function unknown	Cellular Component: nucleus (GO:0005634);;	--	--	--	S	Function unknown	hypothetical protein ARALYDRAFT_319455 [Arabidopsis lyrata subsp. lyrata]	cellular component: cell part (GO:0044464);; cellular component: cell (GO:0005623);; cellular component: organelle (GO:0043226);;
gene2542	12.3514	2.56445	3.13616	LOC107434735	[C]	Energy production and conversion	Molecular Function: FMN binding (GO:0010181);; Molecular Function: very-long-chain-(S)-2-hydroxy-acid oxidase activity (GO:0052852);; Molecular Function: long-chain-(S)-2-hydroxy-long-chain-acid oxidase activity (GO:0052853);; Molecular Function: medium-chain-(S)-2-hydroxy-acid oxidase activity (GO:0052854);; Biological Process: oxidation-reduction process (GO:0055114);;	K11517|0|pxb:103966866|peroxisomal (S)-2-hydroxy-acid oxidase GLO4-like; K11517 (S)-2-hydroxy-acid oxidase [EC:1.1.3.15] (A)	Glyoxylate and dicarboxylate metabolism (ko00630);; Peroxisome (ko04146)	Peroxisomal (S)-2-hydroxy-acid oxidase GLO4 GN=GLO4 OS=Arabidopsis thaliana (Mouse-ear cress) PE=2 SV=1	C	Energy production and conversion	PREDICTED: peroxisomal (S)-2-hydroxy-acid oxidase GLO4-like [Pyrus x bretschneideri]	biological process: single-organism process (GO:0044699);; biological process: metabolic process (GO:0008152);; molecular function: catalytic activity (GO:0003824);; molecular function: binding (GO:0005488);;
gene2548	939.177	294.695	378.389	LOC107434672	[IQ]	Lipid transport and metabolism;; Secondary metabolites biosynthesis, transport and catabolism	Biological Process: very long-chain fatty acid metabolic process (GO:0000038);; Biological Process: sulfur amino acid metabolic process (GO:0000096);; Molecular Function: 3-oxoacyl-[acyl-carrier-protein] synthase activity (GO:0004315);; Biological Process: glycine catabolic process (GO:0006546);; Biological Process: unsaturated fatty acid biosynthetic process (GO:0006636);; Biological Process: ox…	K09458|0|vvi:100262737|3-oxoacyl-[acyl-carrier-protein] synthase II, chloroplastic; K09458 3-oxoacyl-[acyl-carrier-protein] synthase II [EC:2.3.1.179] (A)	Fatty acid biosynthesis (ko00061);; Biotin metabolism (ko00780);; Fatty acid metabolism (ko01212)	3-oxoacyl-[acyl-carrier-protein] synthase II, chloroplastic (Precursor) OS=Arabidopsis thaliana (Mouse-ear cress) PE=1 SV=1	IQ	Lipid transport and metabolism;; Secondary metabolites biosynthesis, transport and catabolism	unnamed protein product [Vitis vinifera]	biological process: reproductive process (GO:0022414);; biological process: single-organism process (GO:0044699);; biological process: metabolic process (GO:0008152);; biological process: cellular process (GO:0009987);; biological process: growth (GO:0040007);; biological process: cellular component organization or biogenesis (GO:0071840);; biological process: developmental process (GO:0032502);;…
gene25663	18.5331	8.62889	11.876	LOC107434645	--	--	--	K14487|0|tcc:TCM_000723|Auxin-responsive GH3 family protein; K14487 auxin responsive GH3 gene family (A)	Plant hormone signal transduction (ko04075)	Probable indole-3-acetic acid-amido synthetase GH3.1 GN=GH3.1 OS=Arabidopsis thaliana (Mouse-ear cress) PE=2 SV=1	R	General function prediction only	PREDICTED: probable indole-3-acetic acid-amido synthetase GH3.1 [Sesamum indicum]	--
gene25670	3.67664	1.23562	1.89881	LOC107434646	[R]	General function prediction only	--	--	--	--	T	Signal transduction mechanisms	Transducin family protein / WD-40 repeat family protein isoform 1 [Theobroma cacao]	--
gene25802	3.93939	1.80815	2.65486	LOC107434799	[J]	Translation, ribosomal structure and biogenesis	--	K02966|3.44861e-84|pop:POPTR_0004s11780g|POPTRDRAFT_556400; 40S ribosomal protein S19; K02966 small subunit ribosomal protein S19e (A)	Ribosome (ko03010)	40S ribosomal protein S19-3 GN=RPS19C OS=Arabidopsis thaliana (Mouse-ear cress) PE=2 SV=1	J	Translation, ribosomal structure and biogenesis	PREDICTED: 40S ribosomal protein S19-3-like [Populus euphratica]	--
gene25849	2.12698	0.65984	0.871331	LOC107434858	[G]	Carbohydrate transport and metabolism	--	K10047|1.05737e-176|pop:POPTR_0006s01600g|POPTRDRAFT_716898; inositol-1-monophosphatase family protein; K10047 inositol-phosphate phosphatase / L-galactose 1-phosphate phosphatase [EC:3.1.3.25 3.1.3.93] (A)	Ascorbate and aldarate metabolism (ko00053);; Inositol phosphate metabolism (ko00562);; Phosphatidylinositol signaling system (ko04070)	Inositol monophosphatase 3 GN=IMP3 OS=Solanum lycopersicum (Tomato) PE=1 SV=1	G	Carbohydrate transport and metabolism	L-galactose-1-phosphate phosphatase [Ziziphus jujuba]	--
gene25940	4.36449	1.57587	1.57947	LOC107434955	--	--	--	--	--	--	S	Function unknown	hypothetical protein L484_001201 [Morus notabilis]	--
gene26041	38.5444	15.7358	15.6718	LOC107435059	--	--	Molecular Function: nucleotide binding (GO:0000166);; Biological Process: RNA splicing, via endonucleolytic cleavage and ligation (GO:0000394);; Molecular Function: DNA-directed RNA polymerase activity (GO:0003899);; Cellular Component: DNA-directed RNA polymerase II, core complex (GO:0005665);; Biological Process: transcription from RNA polymerase II promoter (GO:0006366);;	K03012|1.59951e-44|pper:PRUPE_ppa020509mg|hypothetical protein; K03012 DNA-directed RNA polymerase II subunit RPB4 (A)	Purine metabolism (ko00230);; Pyrimidine metabolism (ko00240);; RNA polymerase (ko03020)	DNA-directed RNA polymerase II subunit 4 GN=MYH9.13 OS=Arabidopsis thaliana (Mouse-ear cress) PE=1 SV=1	K	Transcription	hypothetical protein PRUPE_ppa020509mg [Prunus persica]	biological process: cellular process (GO:0009987);; biological process: metabolic process (GO:0008152);; molecular function: catalytic activity (GO:0003824);; molecular function: binding (GO:0005488);; cellular component: cell (GO:0005623);; cellular component: cell part (GO:0044464);; cellular component: organelle (GO:0043226);; cellular component: organelle part (GO:0044422);; cellular componen…
gene2606	5.3852	2.53077	2.02844	LOC107435511	[R]	General function prediction only	Molecular Function: nucleotide binding (GO:0000166);; Molecular Function: nucleic acid binding (GO:0003676);;	K13201|0|pper:PRUPE_ppa006170mg|hypothetical protein; K13201 nucleolysin TIA-1/TIAR (A)	--	Oligouridylate-binding protein 1B GN=UBP1B OS=Arabidopsis thaliana (Mouse-ear cress) PE=1 SV=1	R	General function prediction only	hypothetical protein PRUPE_ppa006170mg [Prunus persica]	molecular function: binding (GO:0005488);;
gene26392	3.79823	1.80572	1.74083	LOC107435439	[J]	Translation, ribosomal structure and biogenesis	Biological Process: maltose metabolic process (GO:0000023);; Molecular Function: translation elongation factor activity (GO:0003746);; Molecular Function: GTPase activity (GO:0003924);; Molecular Function: ATP binding (GO:0005524);; Molecular Function: GTP binding (GO:0005525);; Cellular Component: mitochondrion (GO:0005739);; Biological Process: pentose-phosphate shunt (GO:0006098);; Biological …	K02355|0|cit:102624603|elongation factor G, chloroplastic-like; K02355 elongation factor G (A)	--	Elongation factor G-2, chloroplastic (Precursor) GN=fusA2 OS=Glycine max (Soybean) PE=3 SV=1	J	Translation, ribosomal structure and biogenesis	PREDICTED: elongation factor G, chloroplastic-like [Citrus sinensis]	cellular component: organelle part (GO:0044422);; cellular component: organelle (GO:0043226);; cellular component: cell (GO:0005623);; cellular component: cell part (GO:0044464);; cellular component: extracellular region (GO:0005576);; molecular function: binding (GO:0005488);; molecular function: catalytic activity (GO:0003824);; biological process: localization (GO:0051179);; biological process…
gene2640	4.06902	1.08951	1.211	LOC107435683	[R]	General function prediction only	--	--	--	Ankyrin repeat-containing protein At3g12360 GN=At3g12360 OS=Arabidopsis thaliana (Mouse-ear cress) PE=2 SV=1	R	General function prediction only	Ankyrin repeat-containing protein [Morus notabilis]	--
gene26440	2.1128	0	0.0152459	LOC107435475	[MG]	Cell wall/membrane/envelope biogenesis;; Carbohydrate transport and metabolism	Molecular Function: catalytic activity (GO:0003824);; Biological Process: cellular metabolic process (GO:0044237);; Molecular Function: coenzyme binding (GO:0050662);;	--	--	--	G	Carbohydrate transport and metabolism	Protein yeeZ [Morus notabilis]	biological process: cellular process (GO:0009987);; biological process: metabolic process (GO:0008152);; molecular function: binding (GO:0005488);; molecular function: catalytic activity (GO:0003824);;
gene26443	9.27071	0	0	LOC107435479	--	--	--	--	--	Protein TIC 20-I, chloroplastic {ECO:0000303|PubMed:23372012} (Precursor) OS=Arabidopsis thaliana (Mouse-ear cress) PE=1 SV=1	S	Function unknown	PREDICTED: protein TIC 20-I, chloroplastic [Prunus mume]	--
gene26456	3.99195	1.69773	2.30991	LOC107435509	--	--	Molecular Function: sequence-specific DNA binding transcription factor activity (GO:0003700);; Molecular Function: signal transducer activity (GO:0004871);; Cellular Component: cytosol (GO:0005829);; Biological Process: regulation of transcription, DNA-templated (GO:0006355);; Biological Process: signal transduction (GO:0007165);; Biological Process: photomorphogenesis (GO:0009640);;	--	--	Scarecrow-like protein 5 GN=SCL5 OS=Arabidopsis thaliana (Mouse-ear cress) PE=2 SV=1	K	Transcription	hypothetical protein L484_009507 [Morus notabilis]	cellular component: cell (GO:0005623);; cellular component: cell part (GO:0044464);; biological process: response to stimulus (GO:0050896);; biological process: single-organism process (GO:0044699);; biological process: developmental process (GO:0032502);; biological process: biological regulation (GO:0065007);; biological process: multicellular organismal process (GO:0032501);; biological proces…
gene26479	10.8688	5.06031	4.37402	LOC107435540	--	--	Cellular Component: plasmodesma (GO:0009506);; Cellular Component: Golgi transport complex (GO:0017119);;	--	--	--	U	Intracellular trafficking, secretion, and vesicular transport	hypothetical protein L484_002999 [Morus notabilis]	cellular component: cell junction (GO:0030054);; cellular component: macromolecular complex (GO:0032991);; cellular component: organelle (GO:0043226);; cellular component: cell part (GO:0044464);; cellular component: cell (GO:0005623);; cellular component: organelle part (GO:0044422);;
gene2652	8.75646	0.176494	0.150992	LOC107435956	--	--	--	--	--	Disease resistance protein RPM1 GN=F17A9.20 OS=Arabidopsis thaliana (Mouse-ear cress) PE=1 SV=1	T	Signal transduction mechanisms	PREDICTED: probable disease resistance protein At1g58602 [Prunus mume]	--
gene2655	4.03354	1.08414	0.864397	LOC107435898	--	--	Molecular Function: ubiquitin-protein transferase activity (GO:0004842);; Biological Process: mitochondrion organization (GO:0007005);; Molecular Function: zinc ion binding (GO:0008270);; Cellular Component: chloroplast envelope (GO:0009941);; Biological Process: protein ubiquitination (GO:0016567);;	K15688|1.08148e-170|tcc:TCM_029137|E3 Ubiquitin ligase family protein isoform 1; K15688 E3 ubiquitin-protein ligase MUL1 [EC:6.3.2.19] (A)	--	--	O	Posttranslational modification, protein turnover, chaperones	Mitochondrial ubiquitin ligase activator of nfkb 1 [Morus notabilis]	cellular component: cell part (GO:0044464);; cellular component: cell (GO:0005623);; cellular component: organelle (GO:0043226);; cellular component: organelle part (GO:0044422);; molecular function: binding (GO:0005488);; molecular function: catalytic activity (GO:0003824);; biological process: cellular component organization or biogenesis (GO:0071840);; biological process: cellular process (GO:…
gene26576	66.1289	3.72774	4.40486	LOC107435640	--	--	Molecular Function: ubiquitin thiolesterase activity (GO:0004221);; Cellular Component: cytosol (GO:0005829);; Biological Process: ubiquitin-dependent protein catabolic process (GO:0006511);;	K05609|3.85727e-149|pper:PRUPE_ppa010780mg|hypothetical protein; K05609 ubiquitin carboxyl-terminal hydrolase L3 [EC:3.4.19.12] (A)	--	--	O	Posttranslational modification, protein turnover, chaperones	hypothetical protein PRUPE_ppa010780mg [Prunus persica]	cellular component: cell (GO:0005623);; cellular component: cell part (GO:0044464);; molecular function: catalytic activity (GO:0003824);; biological process: metabolic process (GO:0008152);; biological process: cellular process (GO:0009987);;
gene266	0.714676	0.227611	0.217686	LOC107434312	--	--	--	--	--	--	S	Function unknown	hypothetical protein JCGZ_05255 [Jatropha curcas]	--
gene26875	2.36125	0.427684	0.53551	LOC107435970	[S]	Function unknown	--	--	--	TMV resistance protein N GN=N OS=Nicotiana glutinosa (Tobacco) PE=1 SV=1	T	Signal transduction mechanisms	PREDICTED: TMV resistance protein N-like [Malus domestica]	--
gene26907	0.475882	0.207635	0.263109	LOC107403251	--	--	--	--	--	Formin-like protein 1 (Precursor) GN=MWL2.16 OS=Arabidopsis thaliana (Mouse-ear cress) PE=1 SV=1	TZ	Signal transduction mechanisms;; Cytoskeleton	PREDICTED: formin-like protein 1-like [Citrus sinensis]	--
gene26949	8.30321	3.49471	2.78661	LOC107403304	--	--	--	--	--	Pentatricopeptide repeat-containing protein At4g17616 GN=At4g17616 OS=Arabidopsis thaliana (Mouse-ear cress) PE=2 SV=1	R	General function prediction only	hypothetical protein L484_023382 [Morus notabilis]	--
gene27060	6.73911	2.75586	3.64159	LOC107403419	--	--	Molecular Function: ubiquitin-protein transferase activity (GO:0004842);; Molecular Function: protein binding (GO:0005515);; Cellular Component: nucleus (GO:0005634);; Biological Process: ubiquitin-dependent protein catabolic process (GO:0006511);; Biological Process: lipid transport (GO:0006869);; Biological Process: protein ubiquitination (GO:0016567);; Biological Process: root hair elongation …	--	--	SKP1-interacting partner 15 GN=F22K20.2 OS=Arabidopsis thaliana (Mouse-ear cress) PE=1 SV=1	R	General function prediction only	PREDICTED: SKP1-interacting partner 15 [Malus domestica]	biological process: growth (GO:0040007);; biological process: cellular process (GO:0009987);; biological process: developmental process (GO:0032502);; biological process: single-organism process (GO:0044699);; biological process: metabolic process (GO:0008152);; biological process: localization (GO:0051179);; molecular function: binding (GO:0005488);; molecular function: catalytic activity (GO:00…
gene27150	5.88405	1.9414	2.4758	LOC107403527	[KAD]	Transcription;; RNA processing and modification;; Cell cycle control, cell division, chromosome partitioning	Molecular Function: binding (GO:0005488);;	K09422|6.17784e-135|vvi:100233128|SREBP; sucrose responsive element binding protein; K09422 myb proto-oncogene protein, plant (A)	--	Transcription factor MYB44 GN=K8K14.2 OS=Arabidopsis thaliana (Mouse-ear cress) PE=2 SV=1	K	Transcription	Transcription factor [Morus notabilis]	molecular function: binding (GO:0005488);;
gene27151	6.54435	2.51755	2.46835	LOC107403520	[E]	Amino acid transport and metabolism	Molecular Function: oxidoreductase activity (GO:0016491);; Biological Process: oxidation-reduction process (GO:0055114);;	--	--	--	R	General function prediction only	PREDICTED: putative oxidoreductase TDA3 [Prunus mume]	molecular function: catalytic activity (GO:0003824);; biological process: metabolic process (GO:0008152);; biological process: single-organism process (GO:0044699);;
gene27213	0.963372	0.422138	0.356688	LOC107403588	[T]	Signal transduction mechanisms	Molecular Function: phosphoprotein phosphatase activity (GO:0004721);; Molecular Function: iron ion binding (GO:0005506);; Molecular Function: manganese ion binding (GO:0030145);;	--	--	Serine/threonine-protein phosphatase BSL3 GN=BSL3 OS=Arabidopsis thaliana (Mouse-ear cress) PE=1 SV=2	T	Signal transduction mechanisms	hypothetical protein PRUPE_ppa000783mg [Prunus persica]	biological process: metabolic process (GO:0008152);; biological process: cellular process (GO:0009987);; molecular function: binding (GO:0005488);; molecular function: catalytic activity (GO:0003824);;
gene27214	4.74221	0.00806133	0.0331025	LOC107403578	[O]	Posttranslational modification, protein turnover, chaperones	Biological Process: protein folding (GO:0006457);; Molecular Function: heat shock protein binding (GO:0031072);;	K09528|1.04757e-147|tcc:TCM_041220|Chaperone DnaJ-domain superfamily protein; K09528 DnaJ homolog subfamily C member 8 (A)	--	Protein FAF-like, chloroplastic (Precursor) GN=At5g22090 OS=Arabidopsis thaliana (Mouse-ear cress) PE=2 SV=1	O	Posttranslational modification, protein turnover, chaperones	Chaperone DnaJ-domain superfamily protein [Theobroma cacao]	biological process: metabolic process (GO:0008152);; biological process: cellular process (GO:0009987);; molecular function: binding (GO:0005488);;
gene27364	0.654389	0	0.00710361	LOC107403753	[RTKL]	General function prediction only;; Signal transduction mechanisms;; Transcription;; Replication, recombination and repair	Molecular Function: nucleotide binding (GO:0000166);; Molecular Function: protein kinase activity (GO:0004672);;	K08857|0|pmum:103339346|serine/threonine-protein kinase Nek6-like; K08857 NIMA (never in mitosis gene a)-related kinase [EC:2.7.11.1] (A)	--	Serine/threonine-protein kinase Nek6 GN=NEK6 OS=Arabidopsis thaliana (Mouse-ear cress) PE=3 SV=1	T	Signal transduction mechanisms	PREDICTED: serine/threonine-protein kinase Nek6-like [Prunus mume]	biological process: metabolic process (GO:0008152);; biological process: cellular process (GO:0009987);; molecular function: binding (GO:0005488);; molecular function: catalytic activity (GO:0003824);;
gene27383	1.05457	0.417001	0.462006	LOC107403768	--	--	--	--	--	--	--	--	--	--
gene27491	6.85016	2.84835	2.46738	LOC107403893	--	--	--	--	--	--	R	General function prediction only	NHL domain-containing protein isoform 3 [Theobroma cacao]	--
gene27501	7.90458	3.73249	3.04134	LOC107403896	--	--	Cellular Component: ubiquitin ligase complex (GO:0000151);; Molecular Function: ubiquitin-protein transferase activity (GO:0004842);; Biological Process: protein ubiquitination (GO:0016567);;	--	--	U-box domain-containing protein 14 GN=PUB14 OS=Arabidopsis thaliana (Mouse-ear cress) PE=1 SV=1	S	Function unknown	U-box domain-containing protein 14 [Morus notabilis]	cellular component: cell part (GO:0044464);; cellular component: cell (GO:0005623);; cellular component: macromolecular complex (GO:0032991);; biological process: cellular process (GO:0009987);; biological process: metabolic process (GO:0008152);; molecular function: catalytic activity (GO:0003824);;
gene27567	41.8705	19.1745	16.7248	LOC107403985	--	--	--	K17607|3.47875e-168|pmum:103335171|TIP41-like protein; K17607 type 2A phosphatase activator TIP41 (A)	--	--	S	Function unknown	PREDICTED: TIP41-like protein [Prunus mume]	--
gene27770	2.63222	1.2867	1.795	LOC107404192	--	--	--	--	--	--	S	Function unknown	Gibberellin 2-beta-dioxygenase 1 -like protein [Gossypium arboreum]	--
gene27781	10.0177	4.90224	6.8387	LOC107404206	--	--	--	--	--	Werner Syndrome-like exonuclease GN=F18A5.260 OS=Arabidopsis thaliana (Mouse-ear cress) PE=1 SV=1	R	General function prediction only	PREDICTED: Werner Syndrome-like exonuclease [Nicotiana tomentosiformis]	--
gene27959	0.76754	0	0	LOC107404404	[IR]	Lipid transport and metabolism;; General function prediction only	--	K04715|0|pxb:103952751|ceramide kinase; K04715 ceramide kinase [EC:2.7.1.138] (A)	Sphingolipid metabolism (ko00600)	Ceramide kinase GN=CERK OS=Arabidopsis thaliana (Mouse-ear cress) PE=1 SV=1	IT	Lipid transport and metabolism;; Signal transduction mechanisms	ceramide kinase-related family protein [Populus trichocarpa]	--
gene27985	8.13927	3.01155	3.22684	LOC107404436	[G]	Carbohydrate transport and metabolism	--	K17279|0|csv:101231525|putative pentatricopeptide repeat-containing protein At3g18840-like; K17279 receptor expression-enhancing protein 5/6 (A)	--	Putative pentatricopeptide repeat-containing protein At3g18840 GN=PCMP-E92 OS=Arabidopsis thaliana (Mouse-ear cress) PE=2 SV=1	R	General function prediction only	PREDICTED: putative pentatricopeptide repeat-containing protein At3g18840-like [Cucumis sativus]	--
gene27987	4.80193	2.46355	1.95191	LOC107404445	--	--	--	--	--	UDP-D-xylose:L-fucose alpha-1,3-D-xylosyltransferase 2 GN=RGXT2 OS=Arabidopsis thaliana (Mouse-ear cress) PE=1 SV=1	S	Function unknown	PREDICTED: UDP-D-xylose:L-fucose alpha-1,3-D-xylosyltransferase 1-like [Prunus mume]	--
gene28017	31.0782	2.20395	2.95449	LOC107404463	[J]	Translation, ribosomal structure and biogenesis	Molecular Function: DNA binding (GO:0003677);; Molecular Function: chromatin binding (GO:0003682);; Molecular Function: RNA binding (GO:0003723);; Molecular Function: structural constituent of ribosome (GO:0003735);; Cellular Component: nucleus (GO:0005634);; Biological Process: translation (GO:0006412);; Cellular Component: cytosolic small ribosomal subunit (GO:0022627);;	K02980|1.75563e-34|vvi:100262886|40S ribosomal protein S29; K02980 small subunit ribosomal protein S29e (A)	Ribosome (ko03010)	40S ribosomal protein S29 GN=RPS29 OS=Triticum aestivum (Wheat) PE=1 SV=1	K	Transcription	PREDICTED: 40S ribosomal protein S29-like [Vitis vinifera]	cellular component: organelle (GO:0043226);; cellular component: cell (GO:0005623);; cellular component: cell part (GO:0044464);; cellular component: organelle part (GO:0044422);; cellular component: macromolecular complex (GO:0032991);; biological process: cellular process (GO:0009987);; biological process: metabolic process (GO:0008152);; molecular function: binding (GO:0005488);; molecular fun…
gene28025	5.04603	2.11892	2.80892	LOC107404479	[O]	Posttranslational modification, protein turnover, chaperones	Molecular Function: serine-type endopeptidase activity (GO:0004252);; Cellular Component: extracellular region (GO:0005576);; Biological Process: proteolysis (GO:0006508);; Cellular Component: membrane (GO:0016020);; Molecular Function: identical protein binding (GO:0042802);; Biological Process: negative regulation of catalytic activity (GO:0043086);;	--	--	Subtilisin-like protease (Precursor) GN=At5g67360 OS=Arabidopsis thaliana (Mouse-ear cress) PE=1 SV=1	O	Posttranslational modification, protein turnover, chaperones	Subtilisin-like protease [Morus notabilis]	cellular component: membrane (GO:0016020);; cellular component: extracellular region (GO:0005576);; biological process: metabolic process (GO:0008152);; biological process: biological regulation (GO:0065007);; molecular function: binding (GO:0005488);; molecular function: catalytic activity (GO:0003824);;
gene28027	0.922606	0	0.00566873	LOC107404490	[R]	General function prediction only	Biological Process: mitotic G2 phase (GO:0000085);; Biological Process: mRNA splicing, via spliceosome (GO:0000398);; Biological Process: karyogamy (GO:0000741);; Biological Process: RNA methylation (GO:0001510);; Cellular Component: intracellular (GO:0005622);; Biological Process: mRNA export from nucleus (GO:0006406);; Biological Process: protein import into nucleus (GO:0006606);; Biological Pr…	K14557|0|pper:PRUPE_ppa018565mg|hypothetical protein; K14557 U3 small nucleolar RNA-associated protein 6 (A)	Ribosome biogenesis in eukaryotes (ko03008)	--	A	RNA processing and modification	U3 small nucleolar RNA-associated protein 6-like protein [Morus notabilis]	biological process: single-organism process (GO:0044699);; biological process: reproductive process (GO:0022414);; biological process: localization (GO:0051179);; biological process: metabolic process (GO:0008152);; biological process: biological phase (GO:0044848);; biological process: cellular process (GO:0009987);; biological process: cellular component organization or biogenesis (GO:0071840);…
gene28031	6.01365	0.048212	0.00988007	LOC107404484	[E]	Amino acid transport and metabolism	Molecular Function: aminomethyltransferase activity (GO:0004047);; Cellular Component: mitochondrion (GO:0005739);; Cellular Component: glycine cleavage complex (GO:0005960);; Biological Process: glycine catabolic process (GO:0006546);; Biological Process: pattern specification process (GO:0007389);; Biological Process: regulation of cell size (GO:0008361);; Molecular Function: transaminase activ…	K00605|0|tcc:TCM_030256|Glycine cleavage T-protein family isoform 1; K00605 aminomethyltransferase [EC:2.1.2.10] (A)	Glycine, serine and threonine metabolism (ko00260);; One carbon pool by folate (ko00670);; Carbon metabolism (ko01200)	Aminomethyltransferase, mitochondrial (Precursor) GN=GDCST OS=Pisum sativum (Garden pea) PE=1 SV=2	E	Amino acid transport and metabolism	Aminomethyltransferase [Morus notabilis]	molecular function: catalytic activity (GO:0003824);; biological process: reproductive process (GO:0022414);; biological process: single-organism process (GO:0044699);; biological process: metabolic process (GO:0008152);; biological process: localization (GO:0051179);; biological process: cellular process (GO:0009987);; biological process: cellular component organization or biogenesis (GO:0071840…
gene28036	2.4179	0.236628	0.551318	LOC107404483	--	--	--	--	--	--	T	Signal transduction mechanisms	Disease resistance protein [Morus notabilis]	--
gene28061	4.55099	1.87439	2.45086	LOC107404508	[J]	Translation, ribosomal structure and biogenesis	Biological Process: pseudouridine synthesis (GO:0001522);; Molecular Function: RNA binding (GO:0003723);; Molecular Function: lysozyme activity (GO:0003796);; Molecular Function: pseudouridine synthase activity (GO:0009982);;	--	--	RNA pseudouridine synthase 7 OS=Oryza sativa subsp. japonica (Rice) PE=2 SV=2	A	RNA processing and modification	PREDICTED: RNA pseudourine synthase 7-like [Fragaria vesca subsp. vesca]	biological process: metabolic process (GO:0008152);; biological process: cellular process (GO:0009987);; molecular function: binding (GO:0005488);; molecular function: catalytic activity (GO:0003824);;
gene28288	32.1161	11.2098	12.3143	LOC107404770	[E]	Amino acid transport and metabolism	Molecular Function: 3-deoxy-7-phosphoheptulonate synthase activity (GO:0003849);; Molecular Function: protein binding (GO:0005515);; Biological Process: aromatic amino acid family biosynthetic process (GO:0009073);; Biological Process: chorismate biosynthetic process (GO:0009423);; Cellular Component: chloroplast thylakoid (GO:0009534);; Molecular Function: lyase activity (GO:0016829);;	K01626|0|pper:PRUPE_ppa004348mg|hypothetical protein; K01626 3-deoxy-7-phosphoheptulonate synthase [EC:2.5.1.54] (A)	Phenylalanine, tyrosine and tryptophan biosynthesis (ko00400);; Biosynthesis of amino acids (ko01230)	Phospho-2-dehydro-3-deoxyheptonate aldolase 2, chloroplastic (Precursor) GN=DHS2 OS=Arabidopsis thaliana (Mouse-ear cress) PE=2 SV=2	E	Amino acid transport and metabolism	hypothetical protein PRUPE_ppa004348mg [Prunus persica]	molecular function: catalytic activity (GO:0003824);; molecular function: binding (GO:0005488);; biological process: single-organism process (GO:0044699);; biological process: metabolic process (GO:0008152);; biological process: cellular process (GO:0009987);; cellular component: organelle (GO:0043226);; cellular component: cell (GO:0005623);; cellular component: cell part (GO:0044464);; cellular…
gene28289	8.30251	2.80658	4.30398	LOC107404768	[R]	General function prediction only	Molecular Function: IMP dehydrogenase activity (GO:0003938);; Cellular Component: cytosol (GO:0005829);; Biological Process: response to symbiotic fungus (GO:0009610);; Molecular Function: oxidoreductase activity, acting on single donors with incorporation of molecular oxygen, incorporation of two atoms of oxygen (GO:0016702);; Molecular Function: nitronate monooxygenase activity (GO:0018580);; B…	--	--	--	S	Function unknown	putative nitronate monooxygenase [Morus notabilis]	biological process: single-organism process (GO:0044699);; biological process: response to stimulus (GO:0050896);; biological process: multi-organism process (GO:0051704);; biological process: metabolic process (GO:0008152);; biological process: cellular process (GO:0009987);; molecular function: catalytic activity (GO:0003824);; cellular component: cell part (GO:0044464);; cellular component: ce…
gene28352	4.16397	2.02761	2.60204	LOC107404838	[T]	Signal transduction mechanisms	Molecular Function: phosphoprotein phosphatase activity (GO:0004721);; Biological Process: metabolic process (GO:0008152);; Biological Process: response to water deprivation (GO:0009414);;	--	--	Probable protein phosphatase 2C 34 GN=At3g05640 OS=Arabidopsis thaliana (Mouse-ear cress) PE=2 SV=1	T	Signal transduction mechanisms	PREDICTED: probable protein phosphatase 2C 73-like isoform X1 [Citrus sinensis]	biological process: metabolic process (GO:0008152);; biological process: response to stimulus (GO:0050896);; biological process: cellular process (GO:0009987);; molecular function: catalytic activity (GO:0003824);;
gene28400	1.33087	0.503098	0.528728	LOC107404899	--	--	Molecular Function: peptidase activity (GO:0008233);;	--	--	Protein ASPARTIC PROTEASE IN GUARD CELL 1 (Precursor) GN=ASPG1 OS=Arabidopsis thaliana (Mouse-ear cress) PE=1 SV=1	O	Posttranslational modification, protein turnover, chaperones	Aspartic proteinase nepenthesin-2 precursor, putative [Ricinus communis]	biological process: metabolic process (GO:0008152);; molecular function: catalytic activity (GO:0003824);;
gene28435	23.4243	10.7198	12.2122	LOC107404928	--	--	Cellular Component: plasmodesma (GO:0009506);; Cellular Component: chloroplast (GO:0009507);;	--	--	C2 and GRAM domain-containing protein At1g03370 GN=At1g03370 OS=Arabidopsis thaliana (Mouse-ear cress) PE=2 SV=4	R	General function prediction only	PREDICTED: multiple C2 and transmembrane domain-containing protein 2-like [Fragaria vesca subsp. vesca]	cellular component: cell junction (GO:0030054);; cellular component: organelle (GO:0043226);; cellular component: cell (GO:0005623);; cellular component: cell part (GO:0044464);;
gene28535	2.31455	0.672551	0.669425	LOC107405038	--	--	--	--	--	Zinc-finger homeodomain protein 3 GN=T8K22.16 OS=Arabidopsis thaliana (Mouse-ear cress) PE=1 SV=1	S	Function unknown	PREDICTED: zinc-finger homeodomain protein 2-like [Populus euphratica]	--
gene28540	1.20993	0	0.0232194	LOC107405045	--	--	Biological Process: regulation of transcription, DNA-templated (GO:0006355);;	--	--	Elongator complex protein 5 GN=ELP5 OS=Arabidopsis thaliana (Mouse-ear cress) PE=1 SV=1	S	Function unknown	hypothetical protein L484_027044 [Morus notabilis]	biological process: biological regulation (GO:0065007);;
gene28597	11.8971	4.72273	6.80017	LOC107405107	--	--	--	--	--	--	S	Function unknown	PREDICTED: uncharacterized protein LOC103322754 [Prunus mume]	--
gene2860	22.8344	9.98312	14.739	LOC107405370	--	--	--	--	--	--	--	--	--	--
gene28736	1.78416	0.857722	0.742321	LOC107405254	--	--	--	--	--	--	S	Function unknown	PREDICTED: ataxin-10 [Prunus mume]	--
gene28747	4.50281	2.17803	2.98294	LOC107405267	--	--	--	K17808|1.33568e-82|vvi:100261593|uncharacterized protein C24H6.02c; K17808 mitochondrial protein import protein ZIM17 (A)	--	--	S	Function unknown	DNL-type zinc finger protein [Morus notabilis]	--
gene28765	1.76757	0.0271257	0.0204912	LOC107405288	[R]	General function prediction only	Cellular Component: integral component of membrane (GO:0016021);;	K06890|3.05514e-133|csv:101211383|BI1-like protein-like; K06890 (A)	--	BI1-like protein GN=At4g15470 OS=Arabidopsis thaliana (Mouse-ear cress) PE=2 SV=1	T	Signal transduction mechanisms	hypothetical protein L484_011309 [Morus notabilis]	cellular component: membrane (GO:0016020);; cellular component: membrane part (GO:0044425);;
gene28941	83.5484	0.0839217	0.0724916	LOC107405471	--	--	Cellular Component: proteasome regulatory particle (GO:0005838);; Biological Process: proteolysis (GO:0006508);;	K03031|8.98456e-165|mtr:MTR_1g016750|26S proteasome non-ATPase regulatory subunit; K03031 26S proteasome regulatory subunit N12 (A)	Proteasome (ko03050)	26S proteasome non-ATPase regulatory subunit 8 homolog A GN=RPN12A OS=Arabidopsis thaliana (Mouse-ear cress) PE=1 SV=1	O	Posttranslational modification, protein turnover, chaperones	26S proteasome non-ATPase regulatory subunit [Medicago truncatula]	cellular component: macromolecular complex (GO:0032991);; cellular component: cell part (GO:0044464);; cellular component: cell (GO:0005623);; biological process: metabolic process (GO:0008152);;
gene28984	17.3855	0.437603	0.356318	LOC107405517	--	--	Biological Process: calcium ion transport (GO:0006816);; Molecular Function: calcium:proton antiporter activity (GO:0015369);; Cellular Component: integral component of membrane (GO:0016021);; Biological Process: transmembrane transport (GO:0055085);;	K07300|9.70832e-162|pmum:103341993|vacuolar cation/proton exchanger 3; K07300 Ca2+:H+ antiporter (A)	--	Vacuolar cation/proton exchanger 3 GN=CAX3 OS=Arabidopsis thaliana (Mouse-ear cress) PE=1 SV=1	P	Inorganic ion transport and metabolism	Vacuolar cation/proton exchanger 3 [Morus notabilis]	molecular function: transporter activity (GO:0005215);; biological process: localization (GO:0051179);; biological process: single-organism process (GO:0044699);; biological process: cellular process (GO:0009987);; cellular component: membrane (GO:0016020);; cellular component: membrane part (GO:0044425);;
gene29027	4.64617	1.75292	1.46321	LOC107405567	[V]	Defense mechanisms	Biological Process: drug transmembrane transport (GO:0006855);; Molecular Function: drug transmembrane transporter activity (GO:0015238);; Molecular Function: antiporter activity (GO:0015297);; Cellular Component: membrane (GO:0016020);;	K03327|0|pxb:103932868|MATE efflux family protein ALF5-like; K03327 multidrug resistance protein, MATE family (A)	--	MATE efflux family protein ALF5 GN=MDB19.4 OS=Arabidopsis thaliana (Mouse-ear cress) PE=2 SV=1	R	General function prediction only	PREDICTED: MATE efflux family protein ALF5-like [Pyrus x bretschneideri]	molecular function: transporter activity (GO:0005215);; biological process: cellular process (GO:0009987);; biological process: localization (GO:0051179);; biological process: single-organism process (GO:0044699);; biological process: response to stimulus (GO:0050896);; cellular component: membrane (GO:0016020);;
gene29036	2.92201	0.174302	0.397555	LOC107405578	--	--	Biological Process: autophagic vacuole assembly (GO:0000045);; Cellular Component: cytoplasm (GO:0005737);; Biological Process: protein transport (GO:0015031);;	K08336|1.97695e-61|pmum:103327640|ubiquitin-like protein ATG12; K08336 ubiquitin-like protein ATG12 (A)	Regulation of autophagy (ko04140)	Ubiquitin-like protein ATG12 GN=ATG12 OS=Medicago truncatula (Barrel medic) PE=3 SV=1	O	Posttranslational modification, protein turnover, chaperones	PREDICTED: ubiquitin-like protein ATG12 [Prunus mume]	cellular component: cell part (GO:0044464);; cellular component: cell (GO:0005623);; biological process: cellular component organization or biogenesis (GO:0071840);; biological process: cellular process (GO:0009987);; biological process: localization (GO:0051179);;
gene29110	3.86043	0.0212908	0.106264	LOC107405657	--	--	--	--	--	--	S	Function unknown	conserved hypothetical protein [Ricinus communis]	--
gene29140	1.78569	0.567033	0.661629	LOC107405689	--	--	Molecular Function: transferase activity (GO:0016740);;	K13648|0|pmum:103334161|probable galacturonosyltransferase 6; K13648 alpha-1,4-galacturonosyltransferase [EC:2.4.1.43] (A)	Starch and sucrose metabolism (ko00500);; Amino sugar and nucleotide sugar metabolism (ko00520)	Probable galacturonosyltransferase 6 GN=GAUT6 OS=Arabidopsis thaliana (Mouse-ear cress) PE=2 SV=1	G	Carbohydrate transport and metabolism	PREDICTED: probable galacturonosyltransferase 6 [Prunus mume]	molecular function: catalytic activity (GO:0003824);; biological process: metabolic process (GO:0008152);;
gene29187	0.304152	0.139869	0.15002	LOC107405745	[U]	Intracellular trafficking, secretion, and vesicular transport	Biological Process: primary metabolic process (GO:0044238);; Biological Process: cellular macromolecule metabolic process (GO:0044260);; Biological Process: single-organism cellular process (GO:0044763);; Biological Process: cellular component organization or biogenesis (GO:0071840);;	--	--	--	U	Intracellular trafficking, secretion, and vesicular transport	PREDICTED: uncharacterized protein LOC103343171 [Prunus mume]	biological process: cellular process (GO:0009987);; biological process: cellular component organization or biogenesis (GO:0071840);; biological process: single-organism process (GO:0044699);; biological process: metabolic process (GO:0008152);;
gene2922	1.34014	0.023172	0.0450487	LOC107405962	[R]	General function prediction only	Molecular Function: Rab GTPase activator activity (GO:0005097);; Cellular Component: intracellular (GO:0005622);; Biological Process: positive regulation of Rab GTPase activity (GO:0032851);; Biological Process: response to cadmium ion (GO:0046686);;	--	--	--	U	Intracellular trafficking, secretion, and vesicular transport	GTPase-activating protein gyp1 [Morus notabilis]	cellular component: cell (GO:0005623);; cellular component: cell part (GO:0044464);; biological process: response to stimulus (GO:0050896);; biological process: biological regulation (GO:0065007);; molecular function: enzyme regulator activity (GO:0030234);;
gene29230	8.97059	0.147037	0.406018	LOC107405788	--	--	Molecular Function: zinc ion binding (GO:0008270);;	--	--	NEP1-interacting protein 2 GN=T17A5.9 OS=Arabidopsis thaliana (Mouse-ear cress) PE=1 SV=1	O	Posttranslational modification, protein turnover, chaperones	PREDICTED: NEP1-interacting protein 1 [Malus domestica]	molecular function: binding (GO:0005488);;
gene29244	4.22426	0	0.0486497	LOC107405812	--	--	Cellular Component: chloroplast thylakoid membrane (GO:0009535);; Biological Process: developmental process (GO:0032502);; Biological Process: primary metabolic process (GO:0044238);; Biological Process: cellular biosynthetic process (GO:0044249);; Biological Process: single-organism process (GO:0044699);; Biological Process: organic substance biosynthetic process (GO:1901576);;	--	--	--	S	Function unknown	hypothetical protein L484_016324 [Morus notabilis]	cellular component: organelle part (GO:0044422);; cellular component: membrane (GO:0016020);; cellular component: organelle (GO:0043226);; cellular component: cell (GO:0005623);; cellular component: cell part (GO:0044464);; biological process: single-organism process (GO:0044699);; biological process: metabolic process (GO:0008152);; biological process: cellular process (GO:0009987);; biological …
gene29291	12.7716	5.74864	5.57817	LOC107405857	[H]	Coenzyme transport and metabolism	Biological Process: ubiquinone biosynthetic process (GO:0006744);; Molecular Function: 2-polyprenyl-6-methoxy-1,4-benzoquinone methyltransferase activity (GO:0008425);; Molecular Function: 3-demethylubiquinone-9 3-O-methyltransferase activity (GO:0008689);; Biological Process: methylation (GO:0032259);;	K00591|4.40948e-74|pxb:103931749|hexaprenyldihydroxybenzoate methyltransferase, mitochondrial-like; K00591 polyprenyldihydroxybenzoate methyltransferase / 3-demethylubiquinol 3-O-methyltransferase [EC:2.1.1.114 2.1.1.64] (A)	Ubiquinone and other terpenoid-quinone biosynthesis (ko00130)	Hexaprenyldihydroxybenzoate methyltransferase, mitochondrial (Precursor) GN=F7F1.13 OS=Arabidopsis thaliana (Mouse-ear cress) PE=2 SV=2	H	Coenzyme transport and metabolism	PREDICTED: hexaprenyldihydroxybenzoate methyltransferase, mitochondrial-like [Pyrus x bretschneideri]	biological process: cellular process (GO:0009987);; biological process: single-organism process (GO:0044699);; biological process: metabolic process (GO:0008152);; molecular function: catalytic activity (GO:0003824);;
gene29496	61.0456	12.7086	12.9303	LOC107406080	[J]	Translation, ribosomal structure and biogenesis	Molecular Function: structural constituent of ribosome (GO:0003735);; Cellular Component: cell wall (GO:0005618);; Cellular Component: nucleolus (GO:0005730);; Biological Process: translation (GO:0006412);; Cellular Component: chloroplast (GO:0009507);; Cellular Component: membrane (GO:0016020);; Cellular Component: cytosolic ribosome (GO:0022626);;	K02960|2.53877e-98|cit:102619145|40S ribosomal protein S16-like; K02960 small subunit ribosomal protein S16e (A)	Ribosome (ko03010)	40S ribosomal protein S16 GN=RPS16 OS=Gossypium hirsutum (Upland cotton) PE=2 SV=1	J	Translation, ribosomal structure and biogenesis	40S ribosomal protein S16A [Hevea brasiliensis]	cellular component: organelle part (GO:0044422);; cellular component: membrane (GO:0016020);; cellular component: organelle (GO:0043226);; cellular component: cell part (GO:0044464);; cellular component: cell (GO:0005623);; cellular component: macromolecular complex (GO:0032991);; molecular function: structural molecule activity (GO:0005198);; biological process: metabolic process (GO:0008152);; …
gene29555	61.4363	29.9713	29.6144	LOC107406145	[E]	Amino acid transport and metabolism	Molecular Function: acetolactate synthase activity (GO:0003984);; Biological Process: gluconeogenesis (GO:0006094);; Biological Process: cytoskeleton organization (GO:0007010);; Biological Process: branched-chain amino acid biosynthetic process (GO:0009082);; Biological Process: proteasomal protein catabolic process (GO:0010498);; Molecular Function: amino acid binding (GO:0016597);;	K01653|8.94154e-76|pper:PRUPE_ppa004716mg|hypothetical protein; K01653 acetolactate synthase I/III small subunit [EC:2.2.1.6] (A)	Valine, leucine and isoleucine biosynthesis (ko00290);; Butanoate metabolism (ko00650);; C5-Branched dibasic acid metabolism (ko00660);; Pantothenate and CoA biosynthesis (ko00770);; 2-Oxocarboxylic acid metabolism (ko01210);; Biosynthesis of amino acids (ko01230)	Acetolactate synthase small subunit 2, chloroplastic (Precursor) GN=At2g31810 OS=Arabidopsis thaliana (Mouse-ear cress) PE=1 SV=1	E	Amino acid transport and metabolism	PREDICTED: acetolactate synthase small subunit 2, chloroplastic-like isoform X3 [Malus domestica]	biological process: single-organism process (GO:0044699);; biological process: metabolic process (GO:0008152);; biological process: cellular process (GO:0009987);; biological process: cellular component organization or biogenesis (GO:0071840);; molecular function: catalytic activity (GO:0003824);; molecular function: binding (GO:0005488);;
gene2964	8.93712	1.8814	2.44226	LOC107406371	--	--	Molecular Function: protein dimerization activity (GO:0046983);;	--	--	Transcription factor bHLH113 GN=MLD14.24 OS=Arabidopsis thaliana (Mouse-ear cress) PE=2 SV=1	S	Function unknown	PREDICTED: transcription factor bHLH113 isoform X1 [Prunus mume]	molecular function: binding (GO:0005488);;
gene29657	0.474766	0.155048	0.164944	LOC107406248	--	--	Cellular Component: cytosol (GO:0005829);; Biological Process: cellulose biosynthetic process (GO:0030244);; Biological Process: D-xylose metabolic process (GO:0042732);; Biological Process: Golgi vesicle transport (GO:0048193);;	--	--	--	S	Function unknown	PREDICTED: vacuolar protein sorting-associated protein 51 homolog isoform X2 [Malus domestica]	cellular component: cell (GO:0005623);; cellular component: cell part (GO:0044464);; biological process: cellular process (GO:0009987);; biological process: single-organism process (GO:0044699);; biological process: localization (GO:0051179);; biological process: metabolic process (GO:0008152);;
gene29730	0.751099	0.00801945	0.00158468	LOC107406328	[L]	Replication, recombination and repair	Molecular Function: nucleic acid binding (GO:0003676);; Molecular Function: catalytic activity (GO:0003824);; Biological Process: DNA metabolic process (GO:0006259);;	--	--	RNA-directed DNA polymerase homolog OS=Oenothera berteroana (Bertero&apos;s evening primrose) PE=4 SV=1	R	General function prediction only	hypothetical protein VITISV_032357 [Vitis vinifera]	biological process: metabolic process (GO:0008152);; biological process: cellular process (GO:0009987);; molecular function: catalytic activity (GO:0003824);; molecular function: binding (GO:0005488);;
gene29848	241.167	115.609	126.867	LOC107406452	--	--	Molecular Function: anthranilate N-benzoyltransferase activity (GO:0047672);;	--	--	BAHD acyltransferase DCR GN=MRO11.2 OS=Arabidopsis thaliana (Mouse-ear cress) PE=2 SV=1	S	Function unknown	BAHD acyltransferase DCR [Morus notabilis]	molecular function: catalytic activity (GO:0003824);; biological process: metabolic process (GO:0008152);;
gene29876	1.85809	0.900591	0.717384	LOC107406482	[BK]	Chromatin structure and dynamics;; Transcription	Molecular Function: binding (GO:0005488);; Cellular Component: nucleus (GO:0005634);; Biological Process: single-organism cellular process (GO:0044763);;	K11649|0|pmum:103338103|SWI/SNF complex subunit SWI3A; K11649 SWI/SNF related-matrix-associated actin-dependent regulator of chromatin subfamily C (A)	--	SWI/SNF complex subunit SWI3A GN=T30B22.7 OS=Arabidopsis thaliana (Mouse-ear cress) PE=1 SV=1	B	Chromatin structure and dynamics	SWI/SNF complex subunit SWI3A [Morus notabilis]	cellular component: organelle (GO:0043226);; cellular component: cell part (GO:0044464);; cellular component: cell (GO:0005623);; molecular function: binding (GO:0005488);; biological process: cellular process (GO:0009987);; biological process: single-organism process (GO:0044699);;
gene29911	2.49927	0.0256238	0.0234151	LOC107406522	[R]	General function prediction only	Molecular Function: nucleotide binding (GO:0000166);; Molecular Function: nucleic acid binding (GO:0003676);;	--	--	Serine/arginine-rich splicing factor SC35 GN=SC35 OS=Arabidopsis thaliana (Mouse-ear cress) PE=1 SV=1	R	General function prediction only	hypothetical protein JCGZ_26067 [Jatropha curcas]	molecular function: binding (GO:0005488);;
gene30005	4.78185	0	0	LOC107406617	--	--	Cellular Component: nucleus (GO:0005634);; Cellular Component: plasma membrane (GO:0005886);; Cellular Component: integral component of membrane (GO:0016021);;	--	--	CASP-like protein 4A3 GN=At2g36330 OS=Arabidopsis thaliana (Mouse-ear cress) PE=2 SV=1	S	Function unknown	hypothetical protein PRUPE_ppa009176mg [Prunus persica]	cellular component: membrane part (GO:0044425);; cellular component: cell part (GO:0044464);; cellular component: cell (GO:0005623);; cellular component: organelle (GO:0043226);; cellular component: membrane (GO:0016020);;
gene30097	1.65724	0.567047	0.525431	LOC107406722	[Q]	Secondary metabolites biosynthesis, transport and catabolism	Molecular Function: iron ion binding (GO:0005506);; Molecular Function: electron carrier activity (GO:0009055);; Biological Process: fruit development (GO:0010154);; Molecular Function: flavonoid 3'-monooxygenase activity (GO:0016711);; Molecular Function: heme binding (GO:0020037);; Biological Process: oxidation-reduction process (GO:0055114);;	--	--	Cytochrome P450 78A6 GN=T3A4.4 OS=Arabidopsis thaliana (Mouse-ear cress) PE=2 SV=1	Q	Secondary metabolites biosynthesis, transport and catabolism	Cytochrome P450 78A3 [Theobroma cacao]	biological process: developmental process (GO:0032502);; biological process: multicellular organismal process (GO:0032501);; biological process: metabolic process (GO:0008152);; biological process: reproductive process (GO:0022414);; biological process: single-organism process (GO:0044699);; molecular function: electron carrier activity (GO:0009055);; molecular function: catalytic activity (GO:00…
gene30101	2.92001	0.0622509	0.0961273	LOC107406726	--	--	Molecular Function: nucleotide binding (GO:0000166);; Molecular Function: nucleic acid binding (GO:0003676);;	K12881|8.66138e-85|tcc:TCM_033734|RNA-binding family protein, putative isoform 1; K12881 THO complex subunit 4 (A)	RNA transport (ko03013);; mRNA surveillance pathway (ko03015);; Spliceosome (ko03040)	THO complex subunit 4D GN=K12B20.19 OS=Arabidopsis thaliana (Mouse-ear cress) PE=1 SV=1	A	RNA processing and modification	RNA-binding family protein, putative isoform 1 [Theobroma cacao]	molecular function: binding (GO:0005488);;
gene30194	8.73789	4.34821	4.83636	LOC107406822	[O]	Posttranslational modification, protein turnover, chaperones	Molecular Function: serine-type endopeptidase activity (GO:0004252);; Cellular Component: extracellular region (GO:0005576);; Biological Process: proteolysis (GO:0006508);; Molecular Function: identical protein binding (GO:0042802);; Biological Process: negative regulation of catalytic activity (GO:0043086);;	--	--	Subtilisin-like protease (Precursor) GN=At5g67360 OS=Arabidopsis thaliana (Mouse-ear cress) PE=1 SV=1	O	Posttranslational modification, protein turnover, chaperones	PREDICTED: subtilisin-like protease [Prunus mume]	biological process: biological regulation (GO:0065007);; biological process: metabolic process (GO:0008152);; molecular function: catalytic activity (GO:0003824);; molecular function: binding (GO:0005488);; cellular component: extracellular region (GO:0005576);;
gene30226	3.21611	1.47853	1.14424	LOC107406859	--	--	Molecular Function: DNA binding (GO:0003677);; Cellular Component: nucleus (GO:0005634);; Biological Process: regulation of transcription, DNA-templated (GO:0006355);; Biological Process: auxin-activated signaling pathway (GO:0009734);; Molecular Function: protein dimerization activity (GO:0046983);;	--	--	Auxin response factor 19 GN=T29M8.9 OS=Arabidopsis thaliana (Mouse-ear cress) PE=1 SV=2	K	Transcription	Auxin response factor 19 [Morus notabilis]	biological process: cellular process (GO:0009987);; biological process: biological regulation (GO:0065007);; biological process: single-organism process (GO:0044699);; biological process: response to stimulus (GO:0050896);; biological process: signaling (GO:0023052);; molecular function: binding (GO:0005488);; cellular component: cell (GO:0005623);; cellular component: cell part (GO:0044464);; ce…
gene30270	2.10641	0.050304	0.161691	LOC107406904	--	--	--	K11699|2.00776e-63|vvi:100260997|probable RNA-dependent RNA polymerase 5; K11699 RNA-dependent RNA polymerase [EC:2.7.7.48] (A)	--	Probable RNA-dependent RNA polymerase 4 GN=F6F22.5 OS=Arabidopsis thaliana (Mouse-ear cress) PE=3 SV=2	A	RNA processing and modification	putative RNA-dependent RNA polymerase 4 [Morus notabilis]	--
gene30427	1.66687	0	0	LOC107407081	[R]	General function prediction only	Biological Process: microtubule nucleation (GO:0007020);; Molecular Function: zinc ion binding (GO:0008270);; Biological Process: plant-type cell wall organization (GO:0009664);; Biological Process: plant-type cell wall biogenesis (GO:0009832);; Biological Process: regulation of meristem growth (GO:0010075);;	--	--	Probable protein S-acyltransferase 22 GN=PAT22 OS=Arabidopsis thaliana (Mouse-ear cress) PE=2 SV=2	R	General function prediction only	hypothetical protein PRUPE_ppa002901mg [Prunus persica]	biological process: cellular component organization or biogenesis (GO:0071840);; biological process: cellular process (GO:0009987);; biological process: biological regulation (GO:0065007);; biological process: single-organism process (GO:0044699);; molecular function: binding (GO:0005488);;
gene3047	73.3044	35.6024	42.9576	LOC107407705	--	--	Molecular Function: inorganic diphosphatase activity (GO:0004427);; Molecular Function: hydrogen-translocating pyrophosphatase activity (GO:0009678);; Biological Process: proton transport (GO:0015992);; Cellular Component: membrane (GO:0016020);;	K01507|0|vvi:100256710|pyrophosphate-energized vacuolar membrane proton pump; K01507 inorganic pyrophosphatase [EC:3.6.1.1] (A)	Oxidative phosphorylation (ko00190)	Pyrophosphate-energized vacuolar membrane proton pump OS=Vigna radiata var. radiata (Mung bean) PE=1 SV=4	S	Function unknown	PREDICTED: pyrophosphate-energized vacuolar membrane proton pump [Vitis vinifera]	cellular component: membrane (GO:0016020);; molecular function: catalytic activity (GO:0003824);; molecular function: transporter activity (GO:0005215);; biological process: single-organism process (GO:0044699);; biological process: localization (GO:0051179);; biological process: metabolic process (GO:0008152);; biological process: cellular process (GO:0009987);;
gene3048	37.2002	9.17228	14.3999	LOC107407412	[C]	Energy production and conversion	Molecular Function: glycerol kinase activity (GO:0004370);; Biological Process: carbohydrate metabolic process (GO:0005975);; Biological Process: glycerol-3-phosphate metabolic process (GO:0006072);; Biological Process: phosphorylation (GO:0016310);;	K00864|0|tcc:TCM_027288|Actin-like ATPase superfamily protein isoform 1; K00864 glycerol kinase [EC:2.7.1.30] (A)	Glycerolipid metabolism (ko00561);; Plant-pathogen interaction (ko04626)	Glycerol kinase GN=T21F11.21 OS=Arabidopsis thaliana (Mouse-ear cress) PE=1 SV=1	G	Carbohydrate transport and metabolism	Actin-like ATPase superfamily protein isoform 1 [Theobroma cacao]	biological process: metabolic process (GO:0008152);; biological process: cellular process (GO:0009987);; molecular function: catalytic activity (GO:0003824);;
gene30528	10.0115	4.25407	6.02205	LOC107407190	--	--	--	--	--	--	--	--	hypothetical protein L484_015554 [Morus notabilis]	--
gene30744	42.4428	4.68254	3.39255	LOC107407411	--	--	--	--	--	--	R	General function prediction only	PREDICTED: uncharacterized protein LOC104414669 isoform X1 [Eucalyptus grandis]	--
gene30745	19.2034	8.94076	7.85817	LOC107407413	--	--	--	K08675|1.10768e-17|pmum:103344549|lon protease homolog 1, mitochondrial; K08675 Lon-like ATP-dependent protease [EC:3.4.21.-] (A)	--	--	L	Replication, recombination and repair	Lon protease-1-like protein [Morus notabilis]	--
gene30757	8.36576	3.41317	3.55649	LOC107407426	[R]	General function prediction only	Biological Process: regulation of transcription, DNA-templated (GO:0006355);;	--	--	Topless-related protein 3 GN=TPR3 OS=Arabidopsis thaliana (Mouse-ear cress) PE=1 SV=1	R	General function prediction only	Topless-related protein 3 [Morus notabilis]	biological process: biological regulation (GO:0065007);;
gene30815	181.453	76.7361	117.581	LOC107407488	--	--	--	--	--	--	E	Amino acid transport and metabolism	hypothetical protein L484_026043 [Morus notabilis]	--
gene30910	12.6309	3.30288	3.38571	LOC107407593	[J]	Translation, ribosomal structure and biogenesis	--	K02955|7.23974e-75|pop:POPTR_0001s22620g|POPTRDRAFT_641003; hypothetical protein; K02955 small subunit ribosomal protein S14e (A)	Ribosome (ko03010)	40S ribosomal protein S14 OS=Zea mays (Maize) PE=1 SV=1	J	Translation, ribosomal structure and biogenesis	hypothetical protein VITISV_018830 [Vitis vinifera]	--
gene31025	2.92984	0.320694	0.877452	LOC107407717	[KAD]	Transcription;; RNA processing and modification;; Cell cycle control, cell division, chromosome partitioning	Molecular Function: binding (GO:0005488);;	K09422|1.4764e-153|tcc:TCM_013983|Myb domain protein 30, putative isoform 2; K09422 myb proto-oncogene protein, plant (A)	--	Myb-related protein 306 OS=Antirrhinum majus (Garden snapdragon) PE=2 SV=1	K	Transcription	Myb-related protein 306, putative isoform 1 [Theobroma cacao]	molecular function: binding (GO:0005488);;
gene3109	19.9723	3.58112	3.35214	LOC107408292	[J]	Translation, ribosomal structure and biogenesis	Molecular Function: iron ion binding (GO:0005506);; Cellular Component: mitochondrion (GO:0005739);; Biological Process: translation (GO:0006412);; Molecular Function: formylmethionine deformylase activity (GO:0008463);; Cellular Component: plant-type cell wall (GO:0009505);; Cellular Component: chloroplast (GO:0009507);; Molecular Function: peptide deformylase activity (GO:0042586);; Biological …	K01462|6.92413e-148|pmum:103341940|peptide deformylase 1A, chloroplastic/mitochondrial; K01462 peptide deformylase [EC:3.5.1.88] (A)	--	Peptide deformylase 1A, chloroplastic (Precursor) GN=PDF1A OS=Solanum lycopersicum (Tomato) PE=2 SV=1	J	Translation, ribosomal structure and biogenesis	Peptide deformylase 1A [Morus notabilis]	cellular component: cell part (GO:0044464);; cellular component: cell (GO:0005623);; cellular component: organelle (GO:0043226);; molecular function: catalytic activity (GO:0003824);; molecular function: binding (GO:0005488);; biological process: metabolic process (GO:0008152);; biological process: cellular process (GO:0009987);;
gene31149	8.25136	0	0	LOC107407851	[A]	RNA processing and modification	Molecular Function: nucleic acid binding (GO:0003676);; Molecular Function: poly(A)-specific ribonuclease activity (GO:0004535);; Cellular Component: nucleus (GO:0005634);;	K12581|3.16424e-165|pxb:103959293|probable CCR4-associated factor 1 homolog 11; K12581 CCR4-NOT transcription complex subunit 7/8 (A)	RNA degradation (ko03018)	Probable CCR4-associated factor 1 homolog 9 GN=CAF1-9 OS=Arabidopsis thaliana (Mouse-ear cress) PE=2 SV=1	K	Transcription	PREDICTED: probable CCR4-associated factor 1 homolog 11 [Pyrus x bretschneideri]	cellular component: organelle (GO:0043226);; cellular component: cell (GO:0005623);; cellular component: cell part (GO:0044464);; biological process: cellular process (GO:0009987);; biological process: metabolic process (GO:0008152);; molecular function: binding (GO:0005488);; molecular function: catalytic activity (GO:0003824);;
gene31183	8.00973	2.03826	1.96889	LOC107407889	--	--	Cellular Component: integral component of membrane (GO:0016021);; Biological Process: sterol biosynthetic process (GO:0016126);; Biological Process: pentacyclic triterpenoid biosynthetic process (GO:0019745);;	--	--	Ergosterol biosynthetic protein 28 GN=At1g10030 OS=Arabidopsis thaliana (Mouse-ear cress) PE=2 SV=2	S	Function unknown	PREDICTED: ergosterol biosynthetic protein 28 [Malus domestica]	cellular component: membrane (GO:0016020);; cellular component: membrane part (GO:0044425);; biological process: cellular process (GO:0009987);; biological process: single-organism process (GO:0044699);; biological process: metabolic process (GO:0008152);;
gene31362	8.41962	0.841203	0.647782	LOC107408083	--	--	--	--	--	BTB/POZ domain-containing protein At2g46260 GN=At2g46260 OS=Arabidopsis thaliana (Mouse-ear cress) PE=2 SV=2	R	General function prediction only	hypothetical protein JCGZ_20504 [Jatropha curcas]	--
gene31367	30.6222	7.37951	9.05245	LOC107408088	[M]	Cell wall/membrane/envelope biogenesis	--	K18819|0|pop:POPTR_0014s11210g|POPTRDRAFT_572572; putative galactinol synthase family protein; K18819 inositol 3-alpha-galactosyltransferase [EC:2.4.1.123] (A)	Galactose metabolism (ko00052)	Galactinol synthase 1 GN=GOLS1 OS=Arabidopsis thaliana (Mouse-ear cress) PE=1 SV=1	G	Carbohydrate transport and metabolism	putative galactinol synthase family protein [Populus trichocarpa]	--
gene31499	9.19102	0	0	LOC107408232	[J]	Translation, ribosomal structure and biogenesis	Cellular Component: plastid large ribosomal subunit (GO:0000311);; Molecular Function: structural constituent of ribosome (GO:0003735);; Biological Process: translation (GO:0006412);; Cellular Component: chloroplast stroma (GO:0009570);; Cellular Component: chloroplast envelope (GO:0009941);; Biological Process: isopentenyl diphosphate biosynthetic process, methylerythritol 4-phosphate pathway (G…	K02939|1.48168e-84|pop:POPTR_0004s22660g|hypothetical protein; K02939 large subunit ribosomal protein L9 (A)	Ribosome (ko03010)	50S ribosomal protein L9, chloroplastic (Precursor) GN=RPL9 OS=Arabidopsis thaliana (Mouse-ear cress) PE=2 SV=1	J	Translation, ribosomal structure and biogenesis	PREDICTED: 50S ribosomal protein L9, chloroplastic [Populus euphratica]	cellular component: macromolecular complex (GO:0032991);; cellular component: organelle (GO:0043226);; cellular component: cell (GO:0005623);; cellular component: cell part (GO:0044464);; cellular component: organelle part (GO:0044422);; molecular function: structural molecule activity (GO:0005198);; biological process: metabolic process (GO:0008152);; biological process: single-organism process …
gene31571	16.8996	0.0356719	0.0629495	LOC107408308	[R]	General function prediction only	Molecular Function: carbonate dehydratase activity (GO:0004089);; Cellular Component: mitochondrial respiratory chain complex I (GO:0005747);; Biological Process: photorespiration (GO:0009853);; Molecular Function: transferase activity (GO:0016740);; Biological Process: starch biosynthetic process (GO:0019252);;	--	--	Gamma carbonic anhydrase 1, mitochondrial (Precursor) OS=Arabidopsis thaliana (Mouse-ear cress) PE=1 SV=1	S	Function unknown	PREDICTED: gamma carbonic anhydrase 1, mitochondrial [Eucalyptus grandis]	molecular function: catalytic activity (GO:0003824);; biological process: cellular process (GO:0009987);; biological process: metabolic process (GO:0008152);; biological process: single-organism process (GO:0044699);; cellular component: macromolecular complex (GO:0032991);; cellular component: membrane part (GO:0044425);; cellular component: organelle part (GO:0044422);; cellular component: memb…
gene31679	10.9005	0.45761	0.977361	LOC107408424	--	--	--	--	--	Mechanosensitive ion channel protein 8 GN=MSL8 OS=Arabidopsis thaliana (Mouse-ear cress) PE=2 SV=2	M	Cell wall/membrane/envelope biogenesis	PREDICTED: mechanosensitive ion channel protein 6-like [Malus domestica]	--
gene32056	7.73381	2.60658	3.72223	LOC107408840	--	--	Biological Process: acetyl-CoA metabolic process (GO:0006084);; Biological Process: plant-type cell wall organization (GO:0009664);; Biological Process: plant-type cell wall biogenesis (GO:0009832);; Biological Process: regulation of meristem growth (GO:0010075);; Biological Process: sterol biosynthetic process (GO:0016126);; Biological Process: brassinosteroid biosynthetic process (GO:0016132);;…	--	--	Fasciclin-like arabinogalactan protein 7 (Precursor) GN=FLA7 OS=Arabidopsis thaliana (Mouse-ear cress) PE=1 SV=1	R	General function prediction only	Fasciclin-like arabinogalactan protein 7 isoform 1 [Theobroma cacao]	biological process: single-organism process (GO:0044699);; biological process: metabolic process (GO:0008152);; biological process: cellular process (GO:0009987);; biological process: biological regulation (GO:0065007);; biological process: cellular component organization or biogenesis (GO:0071840);; cellular component: membrane (GO:0016020);; cellular component: cell part (GO:0044464);; cellular…
gene32220	3.79752	1.20643	1.14365	LOC107409018	--	--	--	--	--	--	K	Transcription	PHD finger protein 3 [Morus notabilis]	--
gene32372	12.6292	5.36939	5.80162	LOC107409183	[C]	Energy production and conversion	--	K00658|0|pop:POPTR_0001s36710g|POPTRDRAFT_642210; 2-oxoacid dehydrogenase family protein; K00658 2-oxoglutarate dehydrogenase E2 component (dihydrolipoamide succinyltransferase) [EC:2.3.1.61] (A)	Citrate cycle (TCA cycle) (ko00020);; Lysine degradation (ko00310);; Carbon metabolism (ko01200)	Dihydrolipoyllysine-residue succinyltransferase component of 2-oxoglutarate dehydrogenase complex 2, mitochondrial (Precursor) GN=At4g26910 OS=Arabidopsis thaliana (Mouse-ear cress) PE=2 SV=2	C	Energy production and conversion	PREDICTED: dihydrolipoyllysine-residue succinyltransferase component of 2-oxoglutarate dehydrogenase complex 2, mitochondrial-like [Populus euphratica]	--
gene32416	1.89292	0.484372	0.337832	LOC107409232	[GEPR]	Carbohydrate transport and metabolism;; Amino acid transport and metabolism;; Inorganic ion transport and metabolism;; General function prediction only	Cellular Component: plant-type vacuole (GO:0000325);; Cellular Component: vacuolar membrane (GO:0005774);; Cellular Component: integral component of membrane (GO:0016021);; Biological Process: transmembrane transport (GO:0055085);;	--	--	SPX domain-containing membrane protein At4g22990 GN=At4g22990 OS=Arabidopsis thaliana (Mouse-ear cress) PE=2 SV=2	P	Inorganic ion transport and metabolism	PREDICTED: SPX domain-containing membrane protein At4g22990-like isoform X2 [Prunus mume]	biological process: localization (GO:0051179);; biological process: single-organism process (GO:0044699);; biological process: cellular process (GO:0009987);; cellular component: membrane part (GO:0044425);; cellular component: cell (GO:0005623);; cellular component: cell part (GO:0044464);; cellular component: organelle (GO:0043226);; cellular component: membrane (GO:0016020);; cellular componen…
gene32435	142.673	33.1693	33.4059	LOC107409253	--	--	Molecular Function: aspartic-type endopeptidase activity (GO:0004190);; Biological Process: proteolysis (GO:0006508);;	--	--	Basic 7S globulin low kDa subunit (Precursor) GN=BG OS=Glycine max (Soybean) PE=1 SV=2	O	Posttranslational modification, protein turnover, chaperones	PREDICTED: basic 7S globulin 2-like [Fragaria vesca subsp. vesca]	molecular function: catalytic activity (GO:0003824);; biological process: metabolic process (GO:0008152);;
gene32487	7.48117	3.13313	2.51713	LOC107409310	--	--	Biological Process: regulation of transcription, DNA-templated (GO:0006355);;	K14494|0|vvi:100253268|DELLA protein GAI-like; K14494 DELLA protein (A)	Plant hormone signal transduction (ko04075)	DELLA protein GAI GN=GAI OS=Gossypium hirsutum (Upland cotton) PE=2 SV=1	K	Transcription	PREDICTED: DELLA protein GAI-like [Vitis vinifera]	biological process: biological regulation (GO:0065007);;
gene32631	31.219	5.72187	6.88029	LOC107409465	[Z]	Cytoskeleton	Molecular Function: GTPase activity (GO:0003924);; Molecular Function: structural constituent of cytoskeleton (GO:0005200);; Molecular Function: GTP binding (GO:0005525);; Cellular Component: cytoplasm (GO:0005737);; Cellular Component: microtubule (GO:0005874);; Biological Process: GTP catabolic process (GO:0006184);; Biological Process: microtubule-based process (GO:0007017);; Biological Proces…	K07374|3.87745e-147|vvi:100854977|tubulin alpha chain-like; K07374 tubulin alpha (A)	Phagosome (ko04145)	Tubulin alpha-1 chain GN=TUBA1 OS=Pisum sativum (Garden pea) PE=3 SV=1	Z	Cytoskeleton	hypothetical protein CICLE_v100015522mg, partial [Citrus clementina]	cellular component: macromolecular complex (GO:0032991);; cellular component: cell part (GO:0044464);; cellular component: cell (GO:0005623);; cellular component: organelle (GO:0043226);; cellular component: organelle part (GO:0044422);; molecular function: structural molecule activity (GO:0005198);; molecular function: catalytic activity (GO:0003824);; molecular function: binding (GO:0005488);; …
gene32920	13.0879	6.25573	5.30743	LOC107409780	--	--	Molecular Function: transferase activity (GO:0016740);;	--	--	Vinorine synthase GN=ACT OS=Rauvolfia serpentina (Serpentine wood) PE=1 SV=2	S	Function unknown	PREDICTED: vinorine synthase-like [Malus domestica]	molecular function: catalytic activity (GO:0003824);; biological process: metabolic process (GO:0008152);;
gene3294	2.06348	0.637179	0.691348	LOC107410269	[Z]	Cytoskeleton	Molecular Function: nucleotide binding (GO:0000166);; Cellular Component: microtubule cytoskeleton (GO:0015630);; Cellular Component: protein complex (GO:0043234);; Cellular Component: cytoskeletal part (GO:0044430);;	K10400|0|pxb:103967104|phragmoplast orienting kinesin 2-like; K10400 kinesin family member 15 (A)	--	Phragmoplast orienting kinesin 2 GN=POK2 OS=Arabidopsis thaliana (Mouse-ear cress) PE=2 SV=1	Z	Cytoskeleton	Kinesin-like protein KIF15 [Morus notabilis]	cellular component: organelle part (GO:0044422);; cellular component: organelle (GO:0043226);; cellular component: cell (GO:0005623);; cellular component: cell part (GO:0044464);; cellular component: macromolecular complex (GO:0032991);; molecular function: binding (GO:0005488);;
gene3304	0.459975	0.0107861	0.00714362	LOC107410284	--	--	Cellular Component: proteasome complex (GO:0000502);; Cellular Component: membrane (GO:0016020);;	K11886|0|pper:PRUPE_ppa000099mg|hypothetical protein; K11886 proteasome component ECM29 (A)	--	--	S	Function unknown	hypothetical protein PRUPE_ppa000099mg [Prunus persica]	cellular component: macromolecular complex (GO:0032991);; cellular component: cell part (GO:0044464);; cellular component: cell (GO:0005623);; cellular component: membrane (GO:0016020);;
gene33110	8.09315	2.06823	1.4446	LOC107409991	--	--	Molecular Function: carboxylic ester hydrolase activity (GO:0004091);; Biological Process: lipid metabolic process (GO:0006629);; Cellular Component: apoplast (GO:0048046);;	--	--	GDSL esterase/lipase CPRD49 (Precursor) GN=CPRD49 OS=Arabidopsis thaliana (Mouse-ear cress) PE=2 SV=1	I	Lipid transport and metabolism	unknown [Lotus japonicus]	biological process: single-organism process (GO:0044699);; biological process: metabolic process (GO:0008152);; cellular component: extracellular region (GO:0005576);;
gene3317	2.81112	0	0.0140356	LOC107410277	--	--	Biological Process: metabolic process (GO:0008152);; Molecular Function: transferase activity, transferring hexosyl groups (GO:0016758);;	--	--	Flavanone 7-O-glucoside 2&apos;&apos;-O-beta-L-rhamnosyltransferase GN=C12RT1 OS=Citrus maxima (Pomelo) PE=1 SV=2	S	Function unknown	PREDICTED: flavanone 7-O-glucoside 2&apos;&apos;-O-beta-L-rhamnosyltransferase [Vitis vinifera]	biological process: metabolic process (GO:0008152);; molecular function: catalytic activity (GO:0003824);;
gene33254	4.10893	1.73311	1.88568	LOC107410147	--	--	--	--	--	Transcription factor TCP7 GN=TCP7 OS=Arabidopsis thaliana (Mouse-ear cress) PE=2 SV=1	K	Transcription	hypothetical protein L484_004771 [Morus notabilis]	--
gene33258	18.2432	7.30712	8.10241	LOC107410151	[Z]	Cytoskeleton	Molecular Function: GTPase activity (GO:0003924);; Molecular Function: structural constituent of cytoskeleton (GO:0005200);; Molecular Function: GTP binding (GO:0005525);; Cellular Component: cytoplasm (GO:0005737);; Cellular Component: microtubule (GO:0005874);; Biological Process: GTP catabolic process (GO:0006184);; Biological Process: microtubule-based process (GO:0007017);; Biological Proces…	K07374|0|pxb:103928067|tubulin alpha chain; K07374 tubulin alpha (A)	Phagosome (ko04145)	Tubulin alpha chain GN=TUBA OS=Prunus dulcis (Almond) PE=2 SV=1	Z	Cytoskeleton	alpha-tubulin [Gossypium hirsutum]	cellular component: macromolecular complex (GO:0032991);; cellular component: organelle (GO:0043226);; cellular component: cell part (GO:0044464);; cellular component: cell (GO:0005623);; cellular component: organelle part (GO:0044422);; biological process: single-organism process (GO:0044699);; biological process: metabolic process (GO:0008152);; biological process: cellular process (GO:0009987)…
gene33304	27.7949	5.64708	4.47403	LOC107410202	--	--	--	--	--	--	R	General function prediction only	putative transporter MCH1 [Morus notabilis]	--
gene3401	2.95712	0.640937	1.2957	LOC107410366	--	--	--	--	--	--	E	Amino acid transport and metabolism	PREDICTED: methyltransferase-like protein 13 [Prunus mume]	--
gene3519	0.972445	0.460454	0.663244	LOC107410509	[RTKL]	General function prediction only;; Signal transduction mechanisms;; Transcription;; Replication, recombination and repair	Molecular Function: protein serine/threonine kinase activity (GO:0004674);; Molecular Function: ATP binding (GO:0005524);; Biological Process: protein phosphorylation (GO:0006468);; Cellular Component: chloroplast (GO:0009507);;	--	--	Serine/threonine-protein kinase D6PKL2 GN=MCA23.7 OS=Arabidopsis thaliana (Mouse-ear cress) PE=1 SV=1	T	Signal transduction mechanisms	PREDICTED: protein kinase G11A-like [Cucumis sativus]	cellular component: cell (GO:0005623);; cellular component: cell part (GO:0044464);; cellular component: organelle (GO:0043226);; molecular function: catalytic activity (GO:0003824);; molecular function: binding (GO:0005488);; biological process: metabolic process (GO:0008152);; biological process: cellular process (GO:0009987);;
gene3562	3.37708	0.847252	1.06283	LOC107410552	--	--	--	--	--	--	S	Function unknown	PREDICTED: uncharacterized protein At1g08160-like [Citrus sinensis]	--
gene3578	23.7021	5.94324	10.2769	LOC107410583	--	--	Molecular Function: gamma-aminobutyric acid transmembrane transporter activity (GO:0015185);; Biological Process: gamma-aminobutyric acid transport (GO:0015812);; Cellular Component: integral component of membrane (GO:0016021);;	--	--	GABA transporter 1 GN=T23G18.9 OS=Arabidopsis thaliana (Mouse-ear cress) PE=1 SV=1	E	Amino acid transport and metabolism	Transmembrane amino acid transporter family protein isoform 1 [Theobroma cacao]	cellular component: membrane part (GO:0044425);; cellular component: membrane (GO:0016020);; biological process: single-organism process (GO:0044699);; biological process: localization (GO:0051179);; biological process: cellular process (GO:0009987);; molecular function: transporter activity (GO:0005215);;
gene3581	6.92533	0.58169	0.581561	LOC107410596	--	--	--	--	--	--	S	Function unknown	PREDICTED: uncharacterized protein C227.17c [Prunus mume]	--
gene3682	3.99532	0.0602542	0.0190477	LOC107410684	[PR]	Inorganic ion transport and metabolism;; General function prediction only	Biological Process: cell death (GO:0008219);; Cellular Component: chloroplast thylakoid (GO:0009534);; Cellular Component: chloroplast inner membrane (GO:0009706);; Biological Process: embryo development ending in seed dormancy (GO:0009793);; Biological Process: defense response to bacterium, incompatible interaction (GO:0009816);; Biological Process: leaf morphogenesis (GO:0009965);; Biological …	K13071|0|pper:PRUPE_ppa019738mg|hypothetical protein; K13071 pheophorbide a oxygenase [EC:1.14.12.20] (A)	Porphyrin and chlorophyll metabolism (ko00860)	Pheophorbide a oxygenase, chloroplastic (Precursor) GN=F28D10_70 OS=Arabidopsis thaliana (Mouse-ear cress) PE=1 SV=1	R	General function prediction only	hypothetical protein PRUPE_ppa019738mg, partial [Prunus persica]	cellular component: organelle part (GO:0044422);; cellular component: membrane (GO:0016020);; cellular component: cell (GO:0005623);; cellular component: cell part (GO:0044464);; cellular component: organelle (GO:0043226);; biological process: cellular process (GO:0009987);; biological process: developmental process (GO:0032502);; biological process: cellular component organization or biogenesis …
gene3692	19.3425	0.283278	0.177578	LOC107410696	[E]	Amino acid transport and metabolism	Biological Process: metabolic process (GO:0008152);; Molecular Function: pyridoxal phosphate binding (GO:0030170);; Molecular Function: serine-glyoxylate transaminase activity (GO:0050281);;	K00830|0|pmum:103326783|serine--glyoxylate aminotransferase; K00830 alanine-glyoxylate transaminase / serine-glyoxylate transaminase / serine-pyruvate transaminase [EC:2.6.1.44 2.6.1.45 2.6.1.51] (A)	Alanine, aspartate and glutamate metabolism (ko00250);; Glycine, serine and threonine metabolism (ko00260);; Glyoxylate and dicarboxylate metabolism (ko00630);; Carbon metabolism (ko01200);; Peroxisome (ko04146)	Serine--glyoxylate aminotransferase GN=AGT1 OS=Arabidopsis thaliana (Mouse-ear cress) PE=1 SV=2	E	Amino acid transport and metabolism	PREDICTED: serine--glyoxylate aminotransferase [Nelumbo nucifera]	biological process: metabolic process (GO:0008152);; molecular function: binding (GO:0005488);; molecular function: catalytic activity (GO:0003824);;
gene3748	2.35455	0.283783	0.20525	LOC107410788	--	--	--	--	--	BURP domain-containing protein 3 (Precursor) OS=Oryza sativa subsp. japonica (Rice) PE=2 SV=1	R	General function prediction only	hypothetical protein PRUPE_ppa008862mg [Prunus persica]	--
gene3804	20.3388	4.31066	3.56417	LOC107410776	--	--	--	--	--	UDP-glycosyltransferase 71D1 GN=UGT71D1 OS=Arabidopsis thaliana (Mouse-ear cress) PE=2 SV=1	CG	Energy production and conversion;; Carbohydrate transport and metabolism	PREDICTED: anthocyanidin 3-O-glucosyltransferase 2-like [Prunus mume]	--
gene3805	14.435	2.28146	3.51117	LOC107410841	--	--	--	--	--	UDP-glycosyltransferase 71C3 GN=UGT71C3 OS=Arabidopsis thaliana (Mouse-ear cress) PE=2 SV=1	CG	Energy production and conversion;; Carbohydrate transport and metabolism	UDP-glycosyltransferase 71C3 [Morus notabilis]	--
gene3811	2.37353	0.864985	1.2881	LOC107410844	--	--	--	--	--	--	S	Function unknown	PREDICTED: uncharacterized protein LOC103320634 [Prunus mume]	--
gene3814	5.13948	1.49766	2.22357	LOC107410860	--	--	--	--	--	--	R	General function prediction only	hypothetical protein L484_022047 [Morus notabilis]	--
gene3816	4.09375	1.28988	1.33017	LOC107410846	[Q]	Secondary metabolites biosynthesis, transport and catabolism	--	K15401|0|rcu:RCOM_0611520|cytochrome P450, putative (EC:1.14.14.1); K15401 fatty acid omega-hydroxylase [EC:1.14.-.-] (A)	Cutin, suberine and wax biosynthesis (ko00073)	Cytochrome P450 86A1 GN=K19M22.6 OS=Arabidopsis thaliana (Mouse-ear cress) PE=1 SV=2	Q	Secondary metabolites biosynthesis, transport and catabolism	cytochrome P450, putative [Ricinus communis]	--
gene3851	49.7147	17.5903	14.7376	LOC107410916	[O]	Posttranslational modification, protein turnover, chaperones	--	K13993|1.27651e-55|pmum:103321551|18.5 kDa class I heat shock protein-like; K13993 HSP20 family protein (A)	Protein processing in endoplasmic reticulum (ko04141)	18.5 kDa class I heat shock protein GN=HSP18.5-C OS=Glycine max (Soybean) PE=3 SV=1	O	Posttranslational modification, protein turnover, chaperones	PREDICTED: 18.5 kDa class I heat shock protein-like [Prunus mume]	--
gene3869	4.41316	0.440581	0.24757	LOC107410901	[O]	Posttranslational modification, protein turnover, chaperones	Molecular Function: lactoylglutathione lyase activity (GO:0004462);; Molecular Function: transferase activity (GO:0016740);;	K00799|3.80359e-96|tcc:TCM_041738|Glutathione S-transferase tau 7, putative; K00799 glutathione S-transferase [EC:2.5.1.18] (A)	Glutathione metabolism (ko00480)	Glutathione S-transferase U7 GN=F16P2.20 OS=Arabidopsis thaliana (Mouse-ear cress) PE=2 SV=1	O	Posttranslational modification, protein turnover, chaperones	hypothetical protein CISIN_1g038634mg [Citrus sinensis]	biological process: metabolic process (GO:0008152);; molecular function: catalytic activity (GO:0003824);;
gene3931	11.2293	0	0	LOC107410947	[O]	Posttranslational modification, protein turnover, chaperones	Cellular Component: cytoplasm (GO:0005737);; Biological Process: response to stress (GO:0006950);;	K13993|2.71886e-76|gmx:100499727|HSP18.5-C; 18.5 kDa class I heat shock protein; K13993 HSP20 family protein (A)	Protein processing in endoplasmic reticulum (ko04141)	18.5 kDa class I heat shock protein GN=HSP18.5-C OS=Glycine max (Soybean) PE=3 SV=1	O	Posttranslational modification, protein turnover, chaperones	18.5 kDa class I heat shock protein [Glycine max]	cellular component: cell (GO:0005623);; cellular component: cell part (GO:0044464);; biological process: response to stimulus (GO:0050896);;
gene3932	42.5627	8.62488	7.13726	LOC107410945	[O]	Posttranslational modification, protein turnover, chaperones	Cellular Component: cytoplasm (GO:0005737);; Biological Process: response to stress (GO:0006950);;	K13993|1.02019e-74|cam:101505773|18.5 kDa class I heat shock protein-like; K13993 HSP20 family protein (A)	Protein processing in endoplasmic reticulum (ko04141)	18.5 kDa class I heat shock protein GN=HSP18.5-C OS=Glycine max (Soybean) PE=3 SV=1	O	Posttranslational modification, protein turnover, chaperones	PREDICTED: 18.5 kDa class I heat shock protein-like [Cicer arietinum]	biological process: response to stimulus (GO:0050896);; cellular component: cell (GO:0005623);; cellular component: cell part (GO:0044464);;
gene3934	40.9941	14.1898	12.3989	LOC107410965	[O]	Posttranslational modification, protein turnover, chaperones	Cellular Component: cytoplasm (GO:0005737);; Biological Process: response to stress (GO:0006950);;	K13993|2.06691e-72|cam:101505773|18.5 kDa class I heat shock protein-like; K13993 HSP20 family protein (A)	Protein processing in endoplasmic reticulum (ko04141)	18.5 kDa class I heat shock protein GN=HSP18.5-C OS=Glycine max (Soybean) PE=3 SV=1	O	Posttranslational modification, protein turnover, chaperones	PREDICTED: 18.5 kDa class I heat shock protein-like [Cicer arietinum]	biological process: response to stimulus (GO:0050896);; cellular component: cell (GO:0005623);; cellular component: cell part (GO:0044464);;
gene3989	22.3373	5.88646	11.1024	LOC107411030	--	--	--	--	--	Scarecrow-like protein 14 GN=SCL14 OS=Arabidopsis thaliana (Mouse-ear cress) PE=2 SV=2	R	General function prediction only	PREDICTED: scarecrow-like protein 14 [Prunus mume]	--
gene4141	15.2481	6.93275	6.98895	LOC107411184	[R]	General function prediction only	Molecular Function: catalytic activity (GO:0003824);; Biological Process: proteolysis (GO:0006508);; Molecular Function: metal ion binding (GO:0046872);;	K06972|0|fve:101300524|presequence protease 1, chloroplastic/mitochondrial-like; K06972 (A)	--	Presequence protease 1, chloroplastic/mitochondrial (Precursor) OS=Arabidopsis thaliana (Mouse-ear cress) PE=1 SV=2	O	Posttranslational modification, protein turnover, chaperones	PREDICTED: presequence protease 1, chloroplastic/mitochondrial-like [Fragaria vesca subsp. vesca]	biological process: metabolic process (GO:0008152);; molecular function: binding (GO:0005488);; molecular function: catalytic activity (GO:0003824);;
gene4143	6.45225	2.16988	2.68142	LOC107411214	[I]	Lipid transport and metabolism	Molecular Function: carboxylic ester hydrolase activity (GO:0052689);;	--	--	Probable carboxylesterase 13 GN=CXE13 OS=Arabidopsis thaliana (Mouse-ear cress) PE=1 SV=1	V	Defense mechanisms	catalytic, putative [Ricinus communis]	molecular function: catalytic activity (GO:0003824);; biological process: metabolic process (GO:0008152);;
gene4204	4.0436	0.253203	0.231642	LOC107411209	--	--	--	--	--	B3 domain-containing transcription factor VRN1 GN=VRN1 OS=Arabidopsis thaliana (Mouse-ear cress) PE=1 SV=1	K	Transcription	B3 domain-containing transcription factor VRN1 [Morus notabilis]	--
gene4206	13.5061	0.615939	0.330514	LOC107411234	--	--	--	--	--	--	S	Function unknown	PREDICTED: uncharacterized protein LOC101301039 [Fragaria vesca subsp. vesca]	--
gene4389	32.5626	2.95355	6.88698	LOC107411451	--	--	Cellular Component: extracellular region (GO:0005576);; Biological Process: syncytium formation (GO:0006949);; Biological Process: unidimensional cell growth (GO:0009826);; Biological Process: plant-type cell wall loosening (GO:0009828);; Biological Process: plant-type cell wall modification involved in multidimensional cell growth (GO:0009831);; Cellular Component: membrane (GO:0016020);;	--	--	Expansin-A8 (Precursor) GN=T2P4.4 OS=Arabidopsis thaliana (Mouse-ear cress) PE=2 SV=1	R	General function prediction only	expansin 5 [Ziziphus jujuba]	cellular component: membrane (GO:0016020);; cellular component: extracellular region (GO:0005576);; biological process: cellular process (GO:0009987);; biological process: growth (GO:0040007);; biological process: developmental process (GO:0032502);; biological process: cellular component organization or biogenesis (GO:0071840);; biological process: single-organism process (GO:0044699);;
gene4445	4.61411	0.289983	0.642462	LOC107411497	--	--	Molecular Function: chaperone binding (GO:0051087);;	--	--	BAG family molecular chaperone regulator 4 GN=BAG4 OS=Arabidopsis thaliana (Mouse-ear cress) PE=1 SV=1	O	Posttranslational modification, protein turnover, chaperones	BCL-2-associated athanogene 4 isoform 1 [Theobroma cacao]	molecular function: binding (GO:0005488);;
gene4447	7.86283	1.49981	3.31864	LOC107411499	--	--	Molecular Function: N-acetyltransferase activity (GO:0008080);; Biological Process: metabolic process (GO:0008152);;	--	--	Probable N-acetyltransferase HLS1-like GN=At2g23060 OS=Arabidopsis thaliana (Mouse-ear cress) PE=2 SV=1	R	General function prediction only	hypothetical protein CICLE_v10028636mg [Citrus clementina]	molecular function: catalytic activity (GO:0003824);; biological process: metabolic process (GO:0008152);;
gene4468	37.7002	18.3078	25.8483	LOC107411520	[RTKL]	General function prediction only;; Signal transduction mechanisms;; Transcription;; Replication, recombination and repair	Molecular Function: calmodulin-dependent protein kinase activity (GO:0004683);; Molecular Function: ATP binding (GO:0005524);; Biological Process: protein phosphorylation (GO:0006468);; Biological Process: signal transduction (GO:0007165);; Biological Process: response to pH (GO:0009268);;	K12761|0|pmum:103341669|CBL-interacting serine/threonine-protein kinase 11; K12761 carbon catabolite-derepressing protein kinase [EC:2.7.11.1] (A)	--	CBL-interacting serine/threonine-protein kinase 11 GN=At2g30360 OS=Arabidopsis thaliana (Mouse-ear cress) PE=1 SV=1	T	Signal transduction mechanisms	hypothetical protein JCGZ_17328 [Jatropha curcas]	biological process: metabolic process (GO:0008152);; biological process: response to stimulus (GO:0050896);; biological process: cellular process (GO:0009987);; biological process: biological regulation (GO:0065007);; molecular function: binding (GO:0005488);; molecular function: catalytic activity (GO:0003824);;
gene4475	20.647	1.75181	1.48669	LOC107411545	--	--	Cellular Component: mitochondrion (GO:0005739);;	--	--	--	S	Function unknown	Uncharacterized protein TCM_014776 [Theobroma cacao]	cellular component: cell part (GO:0044464);; cellular component: cell (GO:0005623);; cellular component: organelle (GO:0043226);;
gene4545	4.66358	0.216971	0.296292	LOC107411603	[N]	Cell motility	Biological Process: protein transport (GO:0015031);;	K12193|3.10488e-108|vvi:100260253|vacuolar protein sorting-associated protein 24 homolog 1; K12193 charged multivesicular body protein 3 (A)	Endocytosis (ko04144)	Vacuolar protein sorting-associated protein 24 homolog 1 GN=MRN17.18 OS=Arabidopsis thaliana (Mouse-ear cress) PE=1 SV=1	U	Intracellular trafficking, secretion, and vesicular transport	PREDICTED: vacuolar protein sorting-associated protein 24 homolog 1 [Vitis vinifera]	biological process: localization (GO:0051179);;
gene4643	0.390319	0.00438005	0	LOC107411716	[KLB]	Transcription;; Replication, recombination and repair;; Chromatin structure and dynamics	Biological Process: cellular process (GO:0009987);;	--	--	FACT complex subunit SPT16 GN=SPT16 OS=Arabidopsis thaliana (Mouse-ear cress) PE=1 SV=1	K	Transcription	FACT complex subunit SPT16 [Morus notabilis]	biological process: cellular process (GO:0009987);;
gene4650	0.874707	0.201658	0.293978	LOC107411712	[V]	Defense mechanisms	Molecular Function: ATP binding (GO:0005524);; Biological Process: ATP catabolic process (GO:0006200);; Biological Process: transport (GO:0006810);; Cellular Component: integral component of membrane (GO:0016021);; Molecular Function: ATPase activity (GO:0016887);;	--	--	Pleiotropic drug resistance protein 3 GN=PDR3 OS=Nicotiana tabacum (Common tobacco) PE=2 SV=1	Q	Secondary metabolites biosynthesis, transport and catabolism	PREDICTED: pleiotropic drug resistance protein 3-like [Prunus mume]	cellular component: membrane (GO:0016020);; cellular component: membrane part (GO:0044425);; biological process: metabolic process (GO:0008152);; biological process: localization (GO:0051179);; biological process: single-organism process (GO:0044699);; biological process: cellular process (GO:0009987);; molecular function: catalytic activity (GO:0003824);; molecular function: binding (GO:0005488)…
gene4701	6.8534	1.86564	1.98871	LOC107411751	--	--	--	--	--	F-box/kelch-repeat protein At3g23880 GN=At3g23880 OS=Arabidopsis thaliana (Mouse-ear cress) PE=2 SV=1	R	General function prediction only	PREDICTED: F-box/kelch-repeat protein At3g23880-like [Nicotiana tomentosiformis]	--
gene4771	49.6904	24.5102	25.118	LOC107411832	--	--	--	--	--	--	S	Function unknown	PREDICTED: uncharacterized protein LOC103344538 [Prunus mume]	--
gene4834	1.55938	0.777015	0.821287	LOC107411888	[O]	Posttranslational modification, protein turnover, chaperones	Biological Process: metabolic process (GO:0008152);; Molecular Function: serine-type peptidase activity (GO:0008236);; Molecular Function: oxidoreductase activity (GO:0016491);;	--	--	Putative protease Do-like 14 OS=Arabidopsis thaliana (Mouse-ear cress) PE=3 SV=2	O	Posttranslational modification, protein turnover, chaperones	hypothetical protein JCGZ_23321 [Jatropha curcas]	biological process: metabolic process (GO:0008152);; molecular function: catalytic activity (GO:0003824);;
gene488	4.10426	0.963345	1.17229	LOC107412111	--	--	--	K01166|3.70401e-17|ppp:PHYPADRAFT_152231|hypothetical protein; K01166 ribonuclease T2 [EC:3.1.27.1] (A)	--	Extracellular ribonuclease LE (Precursor) OS=Solanum lycopersicum (Tomato) PE=1 SV=2	A	RNA processing and modification	S-ribonuclease 4 [Prunus persica]	--
gene5026	1.5749	0.647446	0.555968	LOC107412120	--	--	--	--	--	--	S	Function unknown	PREDICTED: uncharacterized protein LOC103434149 [Malus domestica]	--
gene5059	2.12264	0.723857	1.05115	LOC107412188	[C]	Energy production and conversion	--	--	--	Probable aldo-keto reductase 1 GN=AKR1 OS=Glycine max (Soybean) PE=2 SV=1	C	Energy production and conversion	PREDICTED: probable aldo-keto reductase 1-like [Glycine max]	--
gene5099	4.82441	1.26817	1.81868	LOC107412194	--	--	Molecular Function: nucleic acid binding (GO:0003676);;	--	--	Uncharacterized protein At2g34160 GN=At2g34160 OS=Arabidopsis thaliana (Mouse-ear cress) PE=1 SV=1	R	General function prediction only	PREDICTED: uncharacterized protein At2g34160 [Cucumis melo]	molecular function: binding (GO:0005488);;
gene5151	21.3473	8.58952	9.09251	LOC107412275	[E]	Amino acid transport and metabolism	Molecular Function: cysteine synthase activity (GO:0004124);; Biological Process: cysteine biosynthetic process from serine (GO:0006535);; Molecular Function: transferase activity (GO:0016740);;	K01738|2.32234e-23|mtr:MTR_1g081620|Cysteine synthase; K01738 cysteine synthase A [EC:2.5.1.47] (A)	Cysteine and methionine metabolism (ko00270);; Sulfur metabolism (ko00920);; Carbon metabolism (ko01200);; Biosynthesis of amino acids (ko01230)	Bifunctional L-3-cyanoalanine synthase/cysteine synthase D1 GN=T9J14.11 OS=Arabidopsis thaliana (Mouse-ear cress) PE=1 SV=1	E	Amino acid transport and metabolism	Cysteine synthase [Morus notabilis]	molecular function: catalytic activity (GO:0003824);; biological process: metabolic process (GO:0008152);; biological process: single-organism process (GO:0044699);; biological process: cellular process (GO:0009987);;
gene5160	0.743183	0	0	LOC107412255	--	--	--	--	--	Putative disease resistance protein RGA4 GN=RGA4 OS=Solanum bulbocastanum (Wild potato) PE=2 SV=1	T	Signal transduction mechanisms	LRR and NB-ARC domains-containing disease resistance protein, putative [Theobroma cacao]	--
gene5161	9.17721	0.0197353	0.0122414	LOC107412262	--	--	--	--	--	--	S	Function unknown	hypothetical protein AMTR_s00057p00181010 [Amborella trichopoda]	--
gene5196	1.53031	0.473185	0.784571	LOC107412316	--	--	--	--	--	Pentatricopeptide repeat-containing protein At3g22470, mitochondrial (Precursor) GN=At3g22470 OS=Arabidopsis thaliana (Mouse-ear cress) PE=2 SV=1	S	Function unknown	PREDICTED: putative pentatricopeptide repeat-containing protein At1g12700, mitochondrial [Pyrus x bretschneideri]	--
gene5212	19.8161	9.389	13.6178	LOC107412314	--	--	--	K17435|4.22155e-53|tcc:TCM_017085|Mitochondrial ribosomal protein L37 isoform 1; K17435 large subunit ribosomal protein L54 (A)	--	--	J	Translation, ribosomal structure and biogenesis	PREDICTED: 39S ribosomal protein L54, mitochondrial-like [Eucalyptus grandis]	--
gene5213	208.941	100.815	89.6325	LOC107412304	[RTKL]	General function prediction only;; Signal transduction mechanisms;; Transcription;; Replication, recombination and repair	Molecular Function: protein serine/threonine kinase activity (GO:0004674);; Molecular Function: ATP binding (GO:0005524);; Biological Process: protein phosphorylation (GO:0006468);;	K08794|4.36797e-170|pxb:103934455|phosphoenolpyruvate carboxylase kinase 1-like; K08794 calcium/calmodulin-dependent protein kinase I [EC:2.7.11.17] (A)	--	Phosphoenolpyruvate carboxylase kinase 1 GN=PPCK1 OS=Arabidopsis thaliana (Mouse-ear cress) PE=1 SV=1	T	Signal transduction mechanisms	Phosphoenolpyruvate carboxylase kinase 1 [Morus notabilis]	molecular function: binding (GO:0005488);; molecular function: catalytic activity (GO:0003824);; biological process: cellular process (GO:0009987);; biological process: metabolic process (GO:0008152);;
gene5286	3.12385	0.385686	0.598775	LOC107412412	--	--	--	--	--	F-box/kelch-repeat protein At3g06240 GN=At3g06240 OS=Arabidopsis thaliana (Mouse-ear cress) PE=2 SV=1	R	General function prediction only	PREDICTED: F-box/kelch-repeat protein At3g23880-like [Nicotiana sylvestris]	--
gene5291	4.9807	2.27835	2.681	LOC107412416	--	--	Molecular Function: nucleotidyltransferase activity (GO:0016779);;	--	--	--	J	Translation, ribosomal structure and biogenesis	hypothetical protein PRUPE_ppa004187mg [Prunus persica]	molecular function: catalytic activity (GO:0003824);; biological process: metabolic process (GO:0008152);;
gene5539	9.50336	0	0	LOC107412678	--	--	Molecular Function: DNA binding (GO:0003677);; Molecular Function: zinc ion binding (GO:0008270);;	--	--	Zinc finger A20 and AN1 domain-containing stress-associated protein 8 OS=Oryza sativa subsp. japonica (Rice) PE=2 SV=1	R	General function prediction only	PREDICTED: uncharacterized protein LOC100802969 isoform X1 [Glycine max]	molecular function: binding (GO:0005488);;
gene5542	35.5725	0.745951	0.803749	LOC107412693	[I]	Lipid transport and metabolism	Biological Process: response to chitin (GO:0010200);; Molecular Function: hydrolase activity (GO:0016787);;	--	--	Caffeoylshikimate esterase GN=CSE OS=Arabidopsis thaliana (Mouse-ear cress) PE=1 SV=1	I	Lipid transport and metabolism	hypothetical protein L484_010724 [Morus notabilis]	biological process: metabolic process (GO:0008152);; biological process: response to stimulus (GO:0050896);; molecular function: catalytic activity (GO:0003824);;
gene5551	1.64251	0.0164584	0.0133018	LOC107412691	[C]	Energy production and conversion	Cellular Component: vacuolar proton-transporting V-type ATPase, V0 domain (GO:0000220);; Molecular Function: hydrogen ion transmembrane transporter activity (GO:0015078);; Biological Process: ATP hydrolysis coupled proton transport (GO:0015991);; Molecular Function: hydrolase activity (GO:0016787);;	K02154|0|rcu:RCOM_1596210|vacuolar proton atpase, putative (EC:3.6.3.14); K02154 V-type H+-transporting ATPase subunit a (A)	Oxidative phosphorylation (ko00190);; Phagosome (ko04145)	V-type proton ATPase subunit a3 GN=VHA-a3 OS=Arabidopsis thaliana (Mouse-ear cress) PE=1 SV=1	C	Energy production and conversion	JHL18I08.13 [Jatropha curcas]	cellular component: organelle (GO:0043226);; cellular component: cell (GO:0005623);; cellular component: cell part (GO:0044464);; cellular component: membrane (GO:0016020);; cellular component: organelle part (GO:0044422);; cellular component: membrane part (GO:0044425);; cellular component: macromolecular complex (GO:0032991);; molecular function: catalytic activity (GO:0003824);; molecular func…
gene559	3.26164	0.721021	0.58107	LOC107412897	[G]	Carbohydrate transport and metabolism	Molecular Function: hydrolase activity, hydrolyzing O-glycosyl compounds (GO:0004553);; Cellular Component: cell wall (GO:0005618);; Biological Process: cellular glucan metabolic process (GO:0006073);; Molecular Function: xyloglucan:xyloglucosyl transferase activity (GO:0016762);; Cellular Component: apoplast (GO:0048046);;	K08235|1.35112e-142|fve:101307095|probable xyloglucan endotransglucosylase/hydrolase protein 16-like; K08235 xyloglucan:xyloglucosyl transferase [EC:2.4.1.207] (A)	--	Probable xyloglucan endotransglucosylase/hydrolase protein 15 (Precursor) OS=Arabidopsis thaliana (Mouse-ear cress) PE=1 SV=1	G	Carbohydrate transport and metabolism	PREDICTED: probable xyloglucan endotransglucosylase/hydrolase protein 16-like [Fragaria vesca subsp. vesca]	molecular function: catalytic activity (GO:0003824);; biological process: metabolic process (GO:0008152);; biological process: cellular process (GO:0009987);; cellular component: extracellular region (GO:0005576);; cellular component: cell part (GO:0044464);; cellular component: cell (GO:0005623);;
gene5631	284.023	9.62527	9.56748	LOC107412809	[I]	Lipid transport and metabolism	Molecular Function: carboxylic ester hydrolase activity (GO:0004091);; Biological Process: metabolic process (GO:0008152);; Molecular Function: retinyl-palmitate esterase activity (GO:0050253);; Molecular Function: methyl indole-3-acetate esterase activity (GO:0080030);; Molecular Function: methyl salicylate esterase activity (GO:0080031);; Molecular Function: methyl jasmonate esterase activity (…	--	--	Probable carboxylesterase 17 GN=CXE17 OS=Arabidopsis thaliana (Mouse-ear cress) PE=2 SV=1	V	Defense mechanisms	hypothetical protein JCGZ_24569 [Jatropha curcas]	molecular function: catalytic activity (GO:0003824);; biological process: metabolic process (GO:0008152);;
gene5891	82.5867	32.797	31.8189	LOC107413094	--	--	--	--	--	BAHD acyltransferase At5g47980 GN=BAHD1 OS=Arabidopsis thaliana (Mouse-ear cress) PE=2 SV=1	S	Function unknown	PREDICTED: BAHD acyltransferase At5g47980-like [Prunus mume]	--
gene6083	2.41538	1.07824	1.2159	LOC107413255	--	--	--	--	--	Pentatricopeptide repeat-containing protein At1g12300, mitochondrial (Precursor) GN=At1g12300 OS=Arabidopsis thaliana (Mouse-ear cress) PE=2 SV=1	R	General function prediction only	PREDICTED: putative pentatricopeptide repeat-containing protein At1g12700, mitochondrial [Malus domestica]	--
gene6084	0.921874	0.448786	0.573794	LOC107413270	--	--	--	--	--	Putative pentatricopeptide repeat-containing protein At1g12700, mitochondrial (Precursor) GN=At1g12700 OS=Arabidopsis thaliana (Mouse-ear cress) PE=3 SV=1	R	General function prediction only	PREDICTED: pentatricopeptide repeat-containing protein At1g63330-like [Prunus mume]	--
gene6172	6.182	1.27148	1.39708	LOC107413379	--	--	--	--	--	Disease resistance protein RPP8 GN=MWF20.19 OS=Arabidopsis thaliana (Mouse-ear cress) PE=1 SV=2	T	Signal transduction mechanisms	Putative disease resistance protein [Morus notabilis]	--
gene6206	1.10204	0.532413	0.455711	LOC107413409	[R]	General function prediction only	Biological Process: mitotic cell cycle (GO:0000278);; Biological Process: cytokinesis by cell plate formation (GO:0000911);; Biological Process: establishment of planar polarity (GO:0001736);; Biological Process: regionalization (GO:0003002);; Molecular Function: ARF guanyl-nucleotide exchange factor activity (GO:0005086);; Cellular Component: endosome (GO:0005768);; Cellular Component: plasma me…	K18443|0|pper:PRUPE_ppa000208mg|hypothetical protein; K18443 golgi-specific brefeldin A-resistance guanine nucleotide exchange factor 1 (A)	Endocytosis (ko04144)	ARF guanine-nucleotide exchange factor GNOM GN=At1g13980 OS=Arabidopsis thaliana (Mouse-ear cress) PE=1 SV=1	U	Intracellular trafficking, secretion, and vesicular transport	Pattern formation protein [Morus notabilis]	biological process: single-organism process (GO:0044699);; biological process: reproductive process (GO:0022414);; biological process: localization (GO:0051179);; biological process: metabolic process (GO:0008152);; biological process: growth (GO:0040007);; biological process: cellular process (GO:0009987);; biological process: developmental process (GO:0032502);; biological process: cellular com…
gene6252	1.46047	0.6598	0.680676	LOC107413432	[Z]	Cytoskeleton	--	K11672|0|pmum:103332669|actin-related protein 5; K11672 actin-related protein 5 (A)	--	Actin-related protein 5 GN=ARP5 OS=Arabidopsis thaliana (Mouse-ear cress) PE=1 SV=2	Z	Cytoskeleton	hypothetical protein JCGZ_01435 [Jatropha curcas]	--
gene6265	2.03679	0.0610423	0.0859903	LOC107413478	--	--	--	--	--	Probable nucleoredoxin 1 GN=At1g60420 OS=Arabidopsis thaliana (Mouse-ear cress) PE=1 SV=1	S	Function unknown	PREDICTED: uncharacterized protein LOC104881134 [Vitis vinifera]	--
gene6357	4.74625	2.05826	1.8376	LOC107413581	--	--	--	--	--	--	O	Posttranslational modification, protein turnover, chaperones	PREDICTED: uncharacterized protein LOC103501667 [Cucumis melo]	--
gene6436	25.7984	9.51743	8.66274	LOC107413647	[J]	Translation, ribosomal structure and biogenesis	Biological Process: RNA modification (GO:0009451);;	--	--	RNA pseudouridine synthase 5 GN=At3g52260 OS=Arabidopsis thaliana (Mouse-ear cress) PE=2 SV=2	A	RNA processing and modification	PREDICTED: RNA pseudouridine synthase 5 isoform X1 [Prunus mume]	biological process: cellular process (GO:0009987);; biological process: metabolic process (GO:0008152);;
gene6457	3.37378	0.95203	0.824209	LOC107413683	--	--	--	--	--	Synaptotagmin-3 GN=F21E1.140 OS=Arabidopsis thaliana (Mouse-ear cress) PE=2 SV=1	R	General function prediction only	PREDICTED: synaptotagmin-3 isoform X1 [Eucalyptus grandis]	--
gene6460	6.90547	0	0.0110074	LOC107413686	--	--	Biological Process: macromolecule metabolic process (GO:0043170);; Biological Process: primary metabolic process (GO:0044238);;	--	--	--	R	General function prediction only	PREDICTED: uncharacterized protein LOC102612615 isoform X1 [Citrus sinensis]	biological process: metabolic process (GO:0008152);;
gene6466	2.0293	0.180586	0.57803	LOC107413697	--	--	Biological Process: sterol biosynthetic process (GO:0016126);; Biological Process: pentacyclic triterpenoid biosynthetic process (GO:0019745);;	--	--	Synaptotagmin-3 GN=F21E1.140 OS=Arabidopsis thaliana (Mouse-ear cress) PE=2 SV=1	R	General function prediction only	PREDICTED: synaptotagmin-3-like [Fragaria vesca subsp. vesca]	biological process: metabolic process (GO:0008152);; biological process: single-organism process (GO:0044699);; biological process: cellular process (GO:0009987);;
gene6579	876.299	310.408	375.057	LOC107413815	[O]	Posttranslational modification, protein turnover, chaperones	Cellular Component: cytoplasm (GO:0005737);; Biological Process: response to stress (GO:0006950);;	K13993|7.89461e-78|rcu:RCOM_0497680|heat-shock protein, putative; K13993 HSP20 family protein (A)	Protein processing in endoplasmic reticulum (ko04141)	18.2 kDa class I heat shock protein GN=HSP18.2 OS=Medicago sativa (Alfalfa) PE=2 SV=1	O	Posttranslational modification, protein turnover, chaperones	hypothetical protein JCGZ_01353 [Jatropha curcas]	biological process: response to stimulus (GO:0050896);; cellular component: cell part (GO:0044464);; cellular component: cell (GO:0005623);;
gene6659	12.4302	4.29697	4.18676	LOC107413909	--	--	--	--	--	Probable methyltransferase PMT23 GN=At2g40280 OS=Arabidopsis thaliana (Mouse-ear cress) PE=2 SV=2	R	General function prediction only	putative methyltransferase PMT23 [Morus notabilis]	--
gene6686	4.02181	1.92052	1.62693	LOC107413936	--	--	--	--	--	--	S	Function unknown	hypothetical protein L484_012278 [Morus notabilis]	--
gene6785	3.44154	0	0.0140766	LOC107414036	[Q]	Secondary metabolites biosynthesis, transport and catabolism	Molecular Function: monooxygenase activity (GO:0004497);; Molecular Function: iron ion binding (GO:0005506);; Molecular Function: electron carrier activity (GO:0009055);; Molecular Function: oxidoreductase activity, acting on paired donors, with incorporation or reduction of molecular oxygen (GO:0016705);; Molecular Function: heme binding (GO:0020037);; Biological Process: oxidation-reduction pro…	--	--	Cytochrome P450 714A1 GN=F6A4.120 OS=Arabidopsis thaliana (Mouse-ear cress) PE=2 SV=1	Q	Secondary metabolites biosynthesis, transport and catabolism	hypothetical protein PRUPE_ppa004268mg [Prunus persica]	molecular function: electron carrier activity (GO:0009055);; molecular function: catalytic activity (GO:0003824);; molecular function: binding (GO:0005488);; biological process: single-organism process (GO:0044699);; biological process: metabolic process (GO:0008152);;
gene6789	0.804111	0.383002	0.386668	LOC107414017	--	--	--	--	--	--	S	Function unknown	hypothetical protein PRUPE_ppa000661mg [Prunus persica]	--
gene6828	1.22989	0.184042	0.182323	LOC107414090	--	--	--	K01051|6.80565e-179|pper:PRUPE_ppa007533mg|hypothetical protein; K01051 pectinesterase [EC:3.1.1.11] (A)	Pentose and glucuronate interconversions (ko00040);; Starch and sucrose metabolism (ko00500)	Pectinesterase PPME1 (Precursor) GN=T17F3.3 OS=Arabidopsis thaliana (Mouse-ear cress) PE=1 SV=1	G	Carbohydrate transport and metabolism	hypothetical protein PRUPE_ppa007533mg [Prunus persica]	--
gene6839	26.9429	0.026421	0.123442	LOC107414099	[R]	General function prediction only	Molecular Function: GTP binding (GO:0005525);; Cellular Component: vacuole (GO:0005773);; Cellular Component: plasma membrane (GO:0005886);; Biological Process: small GTPase mediated signal transduction (GO:0007264);; Biological Process: protein transport (GO:0015031);; Molecular Function: hydrolase activity (GO:0016787);;	K07874|8.5305e-143|pxb:103957689|ras-related protein RABD2c; K07874 Ras-related protein Rab-1A (A)	--	GTP-binding protein YPTM2 GN=YPTM2 OS=Zea mays (Maize) PE=2 SV=1	U	Intracellular trafficking, secretion, and vesicular transport	hypothetical protein PRUPE_ppa011633mg [Prunus persica]	cellular component: cell part (GO:0044464);; cellular component: cell (GO:0005623);; cellular component: organelle (GO:0043226);; cellular component: membrane (GO:0016020);; molecular function: binding (GO:0005488);; molecular function: catalytic activity (GO:0003824);; biological process: metabolic process (GO:0008152);; biological process: localization (GO:0051179);; biological process: signali…
gene6843	4.55662	0	0	LOC107414108	--	--	Cellular Component: monolayer-surrounded lipid storage body (GO:0012511);; Cellular Component: integral component of membrane (GO:0016021);;	--	--	Oleosin 1 GN=OLE1 OS=Prunus dulcis (Almond) PE=2 SV=1	S	Function unknown	Oleosin 1 [Morus notabilis]	cellular component: cell part (GO:0044464);; cellular component: cell (GO:0005623);; cellular component: organelle (GO:0043226);; cellular component: membrane (GO:0016020);; cellular component: membrane part (GO:0044425);;
gene6872	1.51262	0.0733884	0.024842	LOC107414128	--	--	--	--	--	--	S	Function unknown	PREDICTED: uncharacterized protein LOC103330974 [Prunus mume]	--
gene6877	35.6136	15.5183	14.0063	LOC107414162	--	--	--	--	--	--	--	--	--	--
gene6895	16.1073	6.49388	6.76765	LOC107414173	[GEPR]	Carbohydrate transport and metabolism;; Amino acid transport and metabolism;; Inorganic ion transport and metabolism;; General function prediction only	Molecular Function: sugar:proton symporter activity (GO:0005351);; Cellular Component: integral component of membrane (GO:0016021);; Molecular Function: 2-alkenal reductase [NAD(P)] activity (GO:0032440);; Biological Process: carbohydrate transmembrane transport (GO:0034219);; Biological Process: oxidation-reduction process (GO:0055114);;	--	--	Hexose carrier protein HEX6 GN=HEX6 OS=Ricinus communis (Castor bean) PE=2 SV=1	R	General function prediction only	PREDICTED: hexose carrier protein HEX6-like [Pyrus x bretschneideri]	biological process: single-organism process (GO:0044699);; biological process: metabolic process (GO:0008152);; biological process: localization (GO:0051179);; biological process: cellular process (GO:0009987);; molecular function: catalytic activity (GO:0003824);; molecular function: transporter activity (GO:0005215);; cellular component: membrane (GO:0016020);; cellular component: membrane part…
gene6930	0.725538	0.274332	0.272442	LOC107414214	--	--	Molecular Function: ligase activity (GO:0016874);;	K10268|0|pmum:103333366|F-box protein At5g51380-like; K10268 F-box and leucine-rich repeat protein 2/20 (A)	--	F-box protein At5g07670 GN=At5g07670 OS=Arabidopsis thaliana (Mouse-ear cress) PE=2 SV=1	R	General function prediction only	PREDICTED: F-box protein At5g51380-like [Prunus mume]	biological process: metabolic process (GO:0008152);; molecular function: catalytic activity (GO:0003824);;
gene694	33.773	5.14179	8.0729	LOC107414349	[E]	Amino acid transport and metabolism	--	K08248|0|pmum:103323466|(R)-mandelonitrile lyase 3-like; K08248 mandelonitrile lyase [EC:4.1.2.10] (A)	Cyanoamino acid metabolism (ko00460)	(R)-mandelonitrile lyase 3 (Precursor) GN=MDL3 OS=Prunus serotina (Black cherry) PE=2 SV=1	G	Carbohydrate transport and metabolism	PREDICTED: (R)-mandelonitrile lyase 3-like [Prunus mume]	--
gene6949	4.04881	1.91314	1.84153	LOC107414213	--	--	Biological Process: nucleotide-sugar transport (GO:0015780);; Cellular Component: integral component of membrane (GO:0016021);;	--	--	GDP-mannose transporter GONST3 GN=GONST3 OS=Arabidopsis thaliana (Mouse-ear cress) PE=2 SV=1	G	Carbohydrate transport and metabolism	hypothetical protein L484_006643 [Morus notabilis]	biological process: localization (GO:0051179);; biological process: single-organism process (GO:0044699);; cellular component: membrane (GO:0016020);; cellular component: membrane part (GO:0044425);;
gene7231	0.857046	0.317302	0.412746	LOC107414547	[V]	Defense mechanisms	Molecular Function: ATP binding (GO:0005524);; Biological Process: ATP catabolic process (GO:0006200);; Cellular Component: integral component of membrane (GO:0016021);; Molecular Function: 2-alkenal reductase [NAD(P)] activity (GO:0032440);; Molecular Function: ATPase activity, coupled to transmembrane movement of substances (GO:0042626);; Biological Process: transmembrane transport (GO:0055085)…	--	--	ABC transporter C family member 10 GN=F17J16.190 OS=Arabidopsis thaliana (Mouse-ear cress) PE=2 SV=2	Q	Secondary metabolites biosynthesis, transport and catabolism	hypothetical protein PRUPE_ppa000197mg [Prunus persica]	cellular component: membrane part (GO:0044425);; cellular component: membrane (GO:0016020);; biological process: cellular process (GO:0009987);; biological process: metabolic process (GO:0008152);; biological process: localization (GO:0051179);; biological process: single-organism process (GO:0044699);; molecular function: binding (GO:0005488);; molecular function: catalytic activity (GO:0003824)…
gene727	41.2306	14.7384	21.0611	LOC107414763	[R]	General function prediction only	Biological Process: ethylene biosynthetic process (GO:0009693);; Molecular Function: 1-aminocyclopropane-1-carboxylate oxidase activity (GO:0009815);; Biological Process: fruit ripening (GO:0009835);; Molecular Function: oxidoreductase activity, acting on paired donors, with incorporation or reduction of molecular oxygen, 2-oxoglutarate as one donor, and incorporation of one atom each of oxygen i…	K05933|9.19193e-117|tcc:TCM_030320|Ethylene-forming enzyme; K05933 aminocyclopropanecarboxylate oxidase [EC:1.14.17.4] (A)	Cysteine and methionine metabolism (ko00270)	1-aminocyclopropane-1-carboxylate oxidase GN=ACO OS=Actinidia deliciosa (Kiwi) PE=2 SV=1	Q	Secondary metabolites biosynthesis, transport and catabolism	ACC oxidase 2 [Ziziphus jujuba]	molecular function: catalytic activity (GO:0003824);; molecular function: binding (GO:0005488);; biological process: single-organism process (GO:0044699);; biological process: reproductive process (GO:0022414);; biological process: metabolic process (GO:0008152);; biological process: cellular process (GO:0009987);; biological process: developmental process (GO:0032502);;
gene7480	4.40623	0.0309324	0.042126	LOC107414856	[E]	Amino acid transport and metabolism	Molecular Function: aminopeptidase activity (GO:0004177);; Biological Process: cellular process (GO:0009987);; Molecular Function: metal ion binding (GO:0046872);;	K01262|1.3824e-54|pvu:PHAVU_002G0270001|hypothetical protein; K01262 Xaa-Pro aminopeptidase [EC:3.4.11.9] (A)	--	--	E	Amino acid transport and metabolism	hypothetical protein PHAVU_002G0270001g, partial [Phaseolus vulgaris]	biological process: metabolic process (GO:0008152);; biological process: cellular process (GO:0009987);; molecular function: binding (GO:0005488);; molecular function: catalytic activity (GO:0003824);;
gene7489	6.35226	2.48368	2.68726	LOC107414884	--	--	Molecular Function: 3-beta-hydroxy-delta5-steroid dehydrogenase activity (GO:0003854);; Biological Process: steroid biosynthetic process (GO:0006694);; Molecular Function: dihydrokaempferol 4-reductase activity (GO:0045552);; Biological Process: oxidation-reduction process (GO:0055114);;	--	--	Tetraketide alpha-pyrone reductase 1 GN=F23E12.20 OS=Arabidopsis thaliana (Mouse-ear cress) PE=2 SV=1	V	Defense mechanisms	hypothetical protein L484_019664 [Morus notabilis]	biological process: metabolic process (GO:0008152);; biological process: single-organism process (GO:0044699);; molecular function: catalytic activity (GO:0003824);;
gene7493	9.44368	4.49575	4.32736	LOC107414848	[KAD]	Transcription;; RNA processing and modification;; Cell cycle control, cell division, chromosome partitioning	Molecular Function: binding (GO:0005488);;	K09422|2.77696e-86|tcc:TCM_025488|Myb domain protein 107; K09422 myb proto-oncogene protein, plant (A)	--	Transcription factor MYB39 GN=dl4925c OS=Arabidopsis thaliana (Mouse-ear cress) PE=2 SV=1	K	Transcription	Myb domain protein 107 [Theobroma cacao]	molecular function: binding (GO:0005488);;
gene7494	78.9115	32.3266	49.1602	LOC107414845	--	--	Biological Process: response to stimulus (GO:0050896);;	--	--	S-norcoclaurine synthase (Precursor) OS=Thalictrum flavum subsp. glaucum (Yellow meadow rue) PE=1 SV=1	S	Function unknown	unknown [Lotus japonicus]	biological process: response to stimulus (GO:0050896);;
gene7496	110.453	48.0935	61.5385	LOC107414869	--	--	--	--	--	Protein EXORDIUM-like 6 (Precursor) GN=EXL6 OS=Arabidopsis thaliana (Mouse-ear cress) PE=3 SV=1	R	General function prediction only	hypothetical protein L484_019671 [Morus notabilis]	--
gene75	138.477	62.5821	51.1378	LOC107413992	[IQ]	Lipid transport and metabolism;; Secondary metabolites biosynthesis, transport and catabolism	Molecular Function: 4-coumarate-CoA ligase activity (GO:0016207);; Molecular Function: Photinus-luciferin 4-monooxygenase (ATP-hydrolyzing) activity (GO:0047077);; Biological Process: oxidation-reduction process (GO:0055114);;	K01904|0|rcu:RCOM_0246200|AMP dependent CoA ligase, putative (EC:1.13.12.7); K01904 4-coumarate--CoA ligase [EC:6.2.1.12] (A)	Ubiquinone and other terpenoid-quinone biosynthesis (ko00130);; Phenylalanine metabolism (ko00360);; Phenylpropanoid biosynthesis (ko00940)	4-coumarate--CoA ligase 1 GN=4CL1 OS=Nicotiana tabacum (Common tobacco) PE=2 SV=1	H	Coenzyme transport and metabolism	4-coumarate:CoA ligase 4 [Betula pendula]	biological process: metabolic process (GO:0008152);; biological process: single-organism process (GO:0044699);; molecular function: catalytic activity (GO:0003824);;
gene7596	0.690722	0.326889	0.428662	LOC107414990	[O]	Posttranslational modification, protein turnover, chaperones	Biological Process: metabolic process (GO:0008152);; Molecular Function: serine-type peptidase activity (GO:0008236);;	--	--	Subtilisin-like protease SBT3.3 {ECO:0000303|PubMed:16193095} (Precursor) OS=Arabidopsis thaliana (Mouse-ear cress) PE=2 SV=1	O	Posttranslational modification, protein turnover, chaperones	Subtilase family protein, putative [Theobroma cacao]	molecular function: catalytic activity (GO:0003824);; biological process: metabolic process (GO:0008152);;
gene7606	12.2254	4.42075	5.20775	LOC107414955	--	--	--	--	--	--	S	Function unknown	PREDICTED: uncharacterized protein LOC103333558 [Prunus mume]	--
gene7713	94.7672	21.9525	34.4678	LOC107415014	--	--	--	--	--	Protein YLS3 (Precursor) GN=YLS3 OS=Arabidopsis thaliana (Mouse-ear cress) PE=2 SV=1	R	General function prediction only	hypothetical protein PRUPE_ppa012060mg [Prunus persica]	--
gene7723	1.12831	0.376015	0.459878	LOC107415019	--	--	--	--	--	Uncharacterized protein At5g41620 GN=At5g41620 OS=Arabidopsis thaliana (Mouse-ear cress) PE=2 SV=2	S	Function unknown	hypothetical protein L484_019188 [Morus notabilis]	--
gene7724	3.21224	1.40807	1.52605	LOC107415016	--	--	Molecular Function: carboxypeptidase activity (GO:0004180);; Biological Process: proteolysis (GO:0006508);; Molecular Function: serine-type peptidase activity (GO:0008236);;	K01285|0|vvi:100252778|lysosomal Pro-X carboxypeptidase-like; K01285 lysosomal Pro-X carboxypeptidase [EC:3.4.16.2] (A)	--	Probable serine protease EDA2 (Precursor) GN=EDA2 OS=Arabidopsis thaliana (Mouse-ear cress) PE=2 SV=2	O	Posttranslational modification, protein turnover, chaperones	PREDICTED: lysosomal Pro-X carboxypeptidase-like [Vitis vinifera]	molecular function: catalytic activity (GO:0003824);; biological process: metabolic process (GO:0008152);;
gene7851	6.53388	2.66523	3.23358	LOC107415248	--	--	--	K12386|9.02791e-137|fve:101293027|cystinosin homolog; K12386 cystinosin (A)	--	Cystinosin homolog GN=At5g40670 OS=Arabidopsis thaliana (Mouse-ear cress) PE=2 SV=1	E	Amino acid transport and metabolism	PREDICTED: cystinosin homolog [Fragaria vesca subsp. vesca]	--
gene7885	43.5953	18.8114	19.5241	LOC107415228	--	--	Molecular Function: carboxylic ester hydrolase activity (GO:0004091);; Biological Process: lipid metabolic process (GO:0006629);; Cellular Component: plant-type cell wall (GO:0009505);; Cellular Component: plasmodesma (GO:0009506);;	--	--	GDSL esterase/lipase At5g14450 (Precursor) GN=At5g14450 OS=Arabidopsis thaliana (Mouse-ear cress) PE=2 SV=1	I	Lipid transport and metabolism	PREDICTED: GDSL esterase/lipase At5g14450-like isoform X2 [Prunus mume]	cellular component: cell (GO:0005623);; cellular component: cell part (GO:0044464);; cellular component: cell junction (GO:0030054);; biological process: metabolic process (GO:0008152);; biological process: single-organism process (GO:0044699);;
gene8046	25.5893	9.13324	10.335	LOC107415405	[CR]	Energy production and conversion;; General function prediction only	Molecular Function: zinc ion binding (GO:0008270);; Molecular Function: oxidoreductase activity (GO:0016491);; Biological Process: oxidation-reduction process (GO:0055114);;	--	--	2-methylene-furan-3-one reductase GN=EO OS=Fragaria ananassa (Strawberry) PE=1 SV=1	Q	Secondary metabolites biosynthesis, transport and catabolism	hypothetical protein PRUPE_ppa008661mg [Prunus persica]	biological process: single-organism process (GO:0044699);; biological process: metabolic process (GO:0008152);; molecular function: catalytic activity (GO:0003824);; molecular function: binding (GO:0005488);;
gene8114	6.05949	2.12035	3.11317	LOC107415515	--	--	--	--	--	--	S	Function unknown	hypothetical protein L484_016343 [Morus notabilis]	--
gene8144	319.285	56.2744	85.194	LOC107415554	--	--	--	--	--	Gibberellin-regulated protein 4 (Precursor) GN=GASA4 OS=Arabidopsis thaliana (Mouse-ear cress) PE=1 SV=2	R	General function prediction only	PREDICTED: gibberellin-regulated protein 4 [Populus euphratica]	--
gene8248	8.59966	3.96434	5.32602	LOC107415639	--	--	--	--	--	Pentatricopeptide repeat-containing protein At1g74750 GN=At1g74750 OS=Arabidopsis thaliana (Mouse-ear cress) PE=2 SV=1	R	General function prediction only	PREDICTED: pentatricopeptide repeat-containing protein At1g18900-like [Pyrus x bretschneideri]	--
gene825	10.4426	4.32259	3.94043	LOC107415946	--	--	--	--	--	Alpha-ketoglutarate-dependent dioxygenase alkB homolog 2 GN=ALKBH2 OS=Arabidopsis thaliana (Mouse-ear cress) PE=2 SV=2	R	General function prediction only	Alpha-ketoglutarate-dependent dioxygenase alkB-3-like protein [Morus notabilis]	--
gene8271	0.333017	0.136474	0.141653	LOC107415684	--	--	Biological Process: phosphatidylinositol dephosphorylation (GO:0046856);;	--	--	Type I inositol 1,4,5-trisphosphate 5-phosphatase 12 GN=F6E13.3 OS=Arabidopsis thaliana (Mouse-ear cress) PE=1 SV=1	U	Intracellular trafficking, secretion, and vesicular transport	PREDICTED: type I inositol 1,4,5-trisphosphate 5-phosphatase 13-like isoform X1 [Pyrus x bretschneideri]	biological process: cellular process (GO:0009987);; biological process: metabolic process (GO:0008152);; biological process: single-organism process (GO:0044699);;
gene8299	96.3405	43.9865	44.5554	LOC107415662	--	--	--	--	--	Triphosphate tunel metalloenzyme 3 GN=TTM3 OS=Arabidopsis thaliana (Mouse-ear cress) PE=1 SV=1	S	Function unknown	PREDICTED: triphosphate tunel metalloenzyme 3 [Pyrus x bretschneideri]	--
gene8353	41.4183	7.13385	4.54071	LOC107415774	--	--	Cellular Component: extracellular region (GO:0005576);; Biological Process: killing of cells of other organism (GO:0031640);; Biological Process: defense response to fungus (GO:0050832);;	--	--	Defensin-like protein (Precursor) OS=Glycine max (Soybean) PE=3 SV=1	R	General function prediction only	unknown [Glycine max]	cellular component: extracellular region (GO:0005576);; biological process: response to stimulus (GO:0050896);; biological process: cell killing (GO:0001906);; biological process: multi-organism process (GO:0051704);; biological process: biological regulation (GO:0065007);;
gene8672	1.51607	0.676619	0.684298	LOC107416130	--	--	Cellular Component: 1,3-beta-D-glucan synthase complex (GO:0000148);; Molecular Function: 1,3-beta-D-glucan synthase activity (GO:0003843);; Biological Process: (1->3)-beta-D-glucan biosynthetic process (GO:0006075);;	K11000|0|pmum:103328798|callose synthase 7; K11000 callose synthase [EC:2.4.1.-] (A)	--	Putative callose synthase 6 GN=F17J16.150 OS=Arabidopsis thaliana (Mouse-ear cress) PE=3 SV=2	M	Cell wall/membrane/envelope biogenesis	PREDICTED: callose synthase 7 [Prunus mume]	cellular component: cell (GO:0005623);; cellular component: cell part (GO:0044464);; cellular component: membrane (GO:0016020);; cellular component: membrane part (GO:0044425);; cellular component: macromolecular complex (GO:0032991);; molecular function: catalytic activity (GO:0003824);; biological process: cellular process (GO:0009987);; biological process: metabolic process (GO:0008152);; biol…
gene8685	1.08469	0.331951	0.573487	LOC107416112	[S]	Function unknown	--	--	--	Putative disease resistance protein At3g14460 GN=At3g14460 OS=Arabidopsis thaliana (Mouse-ear cress) PE=3 SV=1	S	Function unknown	hypothetical protein JCGZ_06618 [Jatropha curcas]	--
gene8712	25.9862	12.2792	16.4182	LOC107416152	--	--	--	--	--	--	S	Function unknown	PREDICTED: uncharacterized protein LOC100253584 [Vitis vinifera]	--
gene881	3.47309	1.48625	1.80966	LOC107416272	--	--	Biological Process: malate transport (GO:0015743);;	--	--	--	S	Function unknown	hypothetical protein JCGZ_10628 [Jatropha curcas]	biological process: single-organism process (GO:0044699);; biological process: localization (GO:0051179);;
gene8848	138.846	36.6039	27.4566	LOC107416307	--	--	--	--	--	--	--	--	--	--
gene8939	4.0063	1.01836	1.16673	LOC107416404	--	--	Molecular Function: glycogenin glucosyltransferase activity (GO:0008466);; Molecular Function: intramolecular transferase activity (GO:0016866);; Biological Process: cellulose biosynthetic process (GO:0030244);;	K13379|4.2702e-111|cmo:103502420|alpha-1,4-glucan-protein synthase [UDP-forming] 2-like; K13379 reversibly glycosylated polypeptide / UDP-arabinopyranose mutase [EC:2.4.1.- 5.4.99.30] (A)	--	Alpha-1,4-glucan-protein synthase [UDP-forming] 2 GN=UPTG2 OS=Solanum tuberosum (Potato) PE=1 SV=1	R	General function prediction only	PREDICTED: alpha-1,4-glucan-protein synthase [UDP-forming] 2-like [Cucumis melo]	molecular function: catalytic activity (GO:0003824);; biological process: metabolic process (GO:0008152);; biological process: single-organism process (GO:0044699);; biological process: cellular process (GO:0009987);;
gene9078	38.6008	16.0536	23.9037	LOC107416577	[DZ]	Cell cycle control, cell division, chromosome partitioning;; Cytoskeleton	--	--	--	Ultraviolet-B receptor UVR8 GN=UVR8 OS=Arabidopsis thaliana (Mouse-ear cress) PE=1 SV=1	S	Function unknown	14-3-3 protein 4 [Morus notabilis]	--
gene9086	4.53911	1.97729	2.43325	LOC107416553	--	--	--	--	--	--	S	Function unknown	PREDICTED: uncharacterized protein LOC103329666 [Prunus mume]	--
gene9162	3.35345	1.18164	1.08008	LOC107416658	--	--	--	K17907|3.43248e-46|mdm:103445640|autophagy-related protein 9; K17907 autophagy-related protein 9 (A)	--	--	S	Function unknown	hypothetical protein [Malus domestica]	--
gene9219	6.39589	0.439508	1.11687	LOC107416707	--	--	--	--	--	7-deoxyloganetin glucosyltransferase GN=UGT85A24 OS=Gardenia jasminoides (Cape jasmine) PE=1 SV=1	G	Carbohydrate transport and metabolism	PREDICTED: 7-deoxyloganetin glucosyltransferase-like [Pyrus x bretschneideri]	--
gene9302	4.62296	0.11557	0.126494	LOC107416791	[G]	Carbohydrate transport and metabolism	Biological Process: maltose metabolic process (GO:0000023);; Cellular Component: cytosol (GO:0005829);; Biological Process: glycogen biosynthetic process (GO:0005978);; Biological Process: pentose-phosphate shunt (GO:0006098);; Molecular Function: glucose-1-phosphate adenylyltransferase activity (GO:0008878);; Cellular Component: amyloplast (GO:0009501);; Cellular Component: chloroplast stroma (G…	K00975|2.44863e-176|pop:POPTR_0014s16990g|POPTRDRAFT_573143; hypothetical protein; K00975 glucose-1-phosphate adenylyltransferase [EC:2.7.7.27] (A)	Starch and sucrose metabolism (ko00500);; Amino sugar and nucleotide sugar metabolism (ko00520)	Glucose-1-phosphate adenylyltransferase small subunit 1, chloroplastic (Precursor) GN=AGPC OS=Vicia faba (Broad bean) PE=2 SV=1	M	Cell wall/membrane/envelope biogenesis	hypothetical protein CISIN_1g009971mg [Citrus sinensis]	cellular component: macromolecular complex (GO:0032991);; cellular component: extracellular region (GO:0005576);; cellular component: organelle part (GO:0044422);; cellular component: organelle (GO:0043226);; cellular component: cell part (GO:0044464);; cellular component: cell (GO:0005623);; molecular function: catalytic activity (GO:0003824);; biological process: developmental process (GO:00325…
gene9359	100.304	8.39557	8.96448	LOC107416855	[J]	Translation, ribosomal structure and biogenesis	--	K02901|4.33116e-84|vvi:100261052|60S ribosomal protein L27-3; K02901 large subunit ribosomal protein L27e (A)	Ribosome (ko03010)	60S ribosomal protein L27-3 GN=RPL27C OS=Arabidopsis thaliana (Mouse-ear cress) PE=2 SV=2	J	Translation, ribosomal structure and biogenesis	PREDICTED: 60S ribosomal protein L27-3-like [Tarenaya hassleriana]	--
gene9361	5.09046	0.401813	0.373	LOC107416861	[J]	Translation, ribosomal structure and biogenesis	Molecular Function: ribonuclease activity (GO:0004540);; Cellular Component: vacuole (GO:0005773);; Biological Process: tRNA processing (GO:0008033);;	K03537|1.82541e-83|pop:POPTR_0015s00340g|POPTRDRAFT_732716; hypothetical protein; K03537 ribonuclease P/MRP protein subunit POP5 [EC:3.1.26.5] (A)	Ribosome biogenesis in eukaryotes (ko03008);; RNA transport (ko03013)	Probable ribonuclease P/MRP protein subunit POP5 GN=EMB1687 OS=Arabidopsis thaliana (Mouse-ear cress) PE=2 SV=1	J	Translation, ribosomal structure and biogenesis	hypothetical protein POPTR_0015s00340g [Populus trichocarpa]	cellular component: organelle (GO:0043226);; cellular component: cell (GO:0005623);; cellular component: cell part (GO:0044464);; molecular function: catalytic activity (GO:0003824);; biological process: metabolic process (GO:0008152);; biological process: cellular process (GO:0009987);;
gene9373	66.0008	26.1485	30.8877	LOC107416878	[G]	Carbohydrate transport and metabolism	Molecular Function: hydrolase activity, hydrolyzing O-glycosyl compounds (GO:0004553);; Cellular Component: cell wall (GO:0005618);; Biological Process: cellular glucan metabolic process (GO:0006073);; Biological Process: regulation of meristem growth (GO:0010075);; Molecular Function: xyloglucan:xyloglucosyl transferase activity (GO:0016762);; Cellular Component: apoplast (GO:0048046);;	K08235|7.41177e-151|pop:POPTR_0019s14590g|POPTRDRAFT_915608; Xyloglucan endotransglucosylase/hydrolase protein 9 precursor; K08235 xyloglucan:xyloglucosyl transferase [EC:2.4.1.207] (A)	--	Xyloglucan endotransglucosylase/hydrolase protein 9 (Precursor) GN=F4C21.14 OS=Arabidopsis thaliana (Mouse-ear cress) PE=2 SV=2	R	General function prediction only	Xyloglucan endotransglucosylase/hydrolase protein 9 precursor [Populus trichocarpa]	cellular component: extracellular region (GO:0005576);; cellular component: cell part (GO:0044464);; cellular component: cell (GO:0005623);; molecular function: catalytic activity (GO:0003824);; biological process: biological regulation (GO:0065007);; biological process: cellular process (GO:0009987);; biological process: metabolic process (GO:0008152);;
gene9376	9.5082	3.56518	3.12822	LOC107416892	--	--	--	--	--	Phenolic glucoside malonyltransferase 2 GN=PMAT2 OS=Arabidopsis thaliana (Mouse-ear cress) PE=1 SV=1	S	Function unknown	hypothetical protein PRUPE_ppa020665mg [Prunus persica]	--
gene9460	0.898696	0	0.00599325	LOC107416975	[P]	Inorganic ion transport and metabolism	Molecular Function: magnesium ion binding (GO:0000287);; Molecular Function: phospholipid-translocating ATPase activity (GO:0004012);; Molecular Function: ATP binding (GO:0005524);; Biological Process: cation transport (GO:0006812);; Biological Process: metabolic process (GO:0008152);; Molecular Function: ATPase activity, coupled to transmembrane movement of ions, phosphorylative mechanism (GO:00…	K01530|0|pmum:103329854|putative phospholipid-transporting ATPase 8; K01530 phospholipid-translocating ATPase [EC:3.6.3.1] (A)	--	Putative phospholipid-transporting ATPase 8 GN=ALA8 OS=Arabidopsis thaliana (Mouse-ear cress) PE=3 SV=1	P	Inorganic ion transport and metabolism	PREDICTED: putative phospholipid-transporting ATPase 8 [Prunus mume]	molecular function: transporter activity (GO:0005215);; molecular function: binding (GO:0005488);; molecular function: catalytic activity (GO:0003824);; biological process: cellular process (GO:0009987);; biological process: localization (GO:0051179);; biological process: metabolic process (GO:0008152);; biological process: single-organism process (GO:0044699);; cellular component: membrane part …
gene9546	2.11418	0.835841	0.751198	LOC107417069	--	--	Cellular Component: plasma membrane (GO:0005886);; Cellular Component: anchored component of membrane (GO:0031225);;	--	--	Uncharacterized GPI-anchored protein At1g61900 (Precursor) GN=At1g61900 OS=Arabidopsis thaliana (Mouse-ear cress) PE=1 SV=1	R	General function prediction only	PREDICTED: uncharacterized GPI-anchored protein At1g61900-like [Fragaria vesca subsp. vesca]	cellular component: membrane (GO:0016020);; cellular component: cell (GO:0005623);; cellular component: cell part (GO:0044464);; cellular component: membrane part (GO:0044425);;
gene9584	7.51557	3.62038	4.48778	LOC107417107	--	--	--	--	--	--	S	Function unknown	hypothetical protein PRUPE_ppa010216mg [Prunus persica]	--
gene9599	12.4491	4.18895	3.38075	LOC107417086	--	--	Molecular Function: transferase activity (GO:0016740);;	--	--	Cellulose synthase-like protein H1 GN=OSJNBa0035F15.9 OS=Oryza sativa subsp. japonica (Rice) PE=2 SV=2	S	Function unknown	PREDICTED: cellulose synthase-like protein H1-like [Fragaria vesca subsp. vesca]	biological process: metabolic process (GO:0008152);; molecular function: catalytic activity (GO:0003824);;
gene9689	3.27211	1.46344	1.94418	LOC107417220	--	--	--	--	--	E3 ubiquitin-protein ligase RING1-like GN=At3g19950 OS=Arabidopsis thaliana (Mouse-ear cress) PE=1 SV=1	O	Posttranslational modification, protein turnover, chaperones	E3 ubiquitin-protein ligase RING1-like protein [Morus notabilis]	--
gene9765	3.23196	0	0.047348	LOC107417303	--	--	Biological Process: regulation of transcription, DNA-templated (GO:0006355);;	--	--	Scarecrow-like protein 6 GN=SCL6 OS=Arabidopsis thaliana (Mouse-ear cress) PE=1 SV=1	K	Transcription	PREDICTED: scarecrow-like protein 27 [Prunus mume]	biological process: biological regulation (GO:0065007);;
gene9913	4.00034	0.184538	0.360951	LOC107417456	[K]	Transcription	Molecular Function: DNA binding (GO:0003677);; Molecular Function: sequence-specific DNA binding transcription factor activity (GO:0003700);; Cellular Component: nucleus (GO:0005634);; Biological Process: regulation of transcription, DNA-templated (GO:0006355);; Molecular Function: protein dimerization activity (GO:0046983);;	--	--	Agamous-like MADS-box protein AGL15 GN=AGL15 OS=Arabidopsis thaliana (Mouse-ear cress) PE=1 SV=1	K	Transcription	PREDICTED: agamous-like MADS-box protein AGL15 [Prunus mume]	cellular component: cell part (GO:0044464);; cellular component: cell (GO:0005623);; cellular component: organelle (GO:0043226);; molecular function: nucleic acid binding transcription factor activity (GO:0001071);; molecular function: binding (GO:0005488);; biological process: biological regulation (GO:0065007);;
gene9951	3.73683	1.27059	1.35898	LOC107417508	[MG]	Cell wall/membrane/envelope biogenesis;; Carbohydrate transport and metabolism	Molecular Function: catalytic activity (GO:0003824);; Biological Process: cellular metabolic process (GO:0044237);; Molecular Function: coenzyme binding (GO:0050662);;	--	--	Cinnamoyl-CoA reductase 1 GN=T24D18.5 OS=Arabidopsis thaliana (Mouse-ear cress) PE=1 SV=1	M	Cell wall/membrane/envelope biogenesis	PREDICTED: cinnamoyl-CoA reductase 1 [Vitis vinifera]	biological process: cellular process (GO:0009987);; biological process: metabolic process (GO:0008152);; molecular function: binding (GO:0005488);; molecular function: catalytic activity (GO:0003824);;
gene9956	3.01642	0.99742	1.04073	LOC107417511	--	--	--	--	--	Systemin receptor SR160 (Precursor) OS=Solanum peruvianum (Peruvian tomato) PE=1 SV=1	R	General function prediction only	PREDICTED: LOW QUALITY PROTEIN: LRR receptor-like serine/threonine-protein kinase GSO1 [Malus domestica]	--
gene9957	1.13748	0.444364	0.469822	LOC107417501	[S]	Function unknown	--	--	--	Probable leucine-rich repeat receptor-like protein kinase At1g35710 (Precursor) GN=At1g35710 OS=Arabidopsis thaliana (Mouse-ear cress) PE=2 SV=1	R	General function prediction only	PREDICTED: LRR receptor-like serine/threonine-protein kinase FLS2 [Vitis vinifera]	--
gene9965	4.25623	0.856816	0.732183	LOC107417509	--	--	Molecular Function: catalytic activity (GO:0003824);;	--	--	Leucine-rich repeat receptor-like protein CLAVATA2 (Precursor) GN=T8F5.16 OS=Arabidopsis thaliana (Mouse-ear cress) PE=1 SV=1	R	General function prediction only	PREDICTED: LRR receptor-like serine/threonine-protein kinase GSO2 [Prunus mume]	molecular function: catalytic activity (GO:0003824);;
jujube_newGene_1056	14.1209	1.4326	1.92143	--	--	--	--	--	--	--	--	--	NB-ARC domain-containing disease resistance protein, putative [Theobroma cacao]	--
jujube_newGene_1058	2.82453	0	0	--	--	--	--	--	--	--	--	--	--	--
jujube_newGene_106	3.28435	1.03685	1.41045	--	--	--	--	--	--	--	T	Signal transduction mechanisms	hypothetical protein PRUPE_ppa009457mg [Prunus persica]	--
jujube_newGene_1064	1.49904	0.183608	0.298339	--	--	--	--	--	--	--	S	Function unknown	hypothetical protein L484_021518 [Morus notabilis]	--
jujube_newGene_120	0.473428	0	0	--	--	--	Molecular Function: nucleic acid binding (GO:0003676);; Molecular Function: catalytic activity (GO:0003824);; Biological Process: DNA metabolic process (GO:0006259);;	--	--	Endonuclease OS=Nicotiana tabacum (Common tobacco) PE=2 SV=1	R	General function prediction only	copia-like polyprotein [Arabidopsis thaliana]	molecular function: binding (GO:0005488);; molecular function: catalytic activity (GO:0003824);; biological process: cellular process (GO:0009987);; biological process: metabolic process (GO:0008152);;
jujube_newGene_1202	14.8059	4.73491	6.86526	--	[H]	Coenzyme transport and metabolism	Molecular Function: prenyltransferase activity (GO:0004659);; Biological Process: phospholipid biosynthetic process (GO:0008654);; Cellular Component: chloroplast (GO:0009507);; Biological Process: terpenoid biosynthetic process (GO:0016114);;	K13789|1.87722e-18|cmo:103497469|geranylgeranyl pyrophosphate synthase, chloroplastic; K13789 geranylgeranyl diphosphate synthase, type II [EC:2.5.1.1 2.5.1.10 2.5.1.29] (A)	Terpenoid backbone biosynthesis (ko00900)	Geranylgeranyl pyrophosphate synthase, chloroplastic/chromoplastic (Precursor) GN=GGPS1 OS=Sinapis alba (White mustard) PE=1 SV=1	H	Coenzyme transport and metabolism	geranyl diphosphate synthase [Mangifera indica]	molecular function: catalytic activity (GO:0003824);; biological process: single-organism process (GO:0044699);; biological process: metabolic process (GO:0008152);; biological process: cellular process (GO:0009987);; cellular component: organelle (GO:0043226);; cellular component: cell part (GO:0044464);; cellular component: cell (GO:0005623);;
jujube_newGene_1206	3.21691	0	0.0265117	--	--	--	Biological Process: response to red or far red light (GO:0009639);;	--	--	High-light-induced protein, chloroplastic (Precursor) GN=T7H20.170 OS=Arabidopsis thaliana (Mouse-ear cress) PE=1 SV=1	S	Function unknown	PREDICTED: uncharacterized protein LOC101209600 [Cucumis sativus]	biological process: response to stimulus (GO:0050896);;
jujube_newGene_1237	69.4564	14.5456	31.2295	--	[R]	General function prediction only	Molecular Function: GTPase activity (GO:0003924);; Molecular Function: GTP binding (GO:0005525);; Biological Process: GTP catabolic process (GO:0006184);; Biological Process: intracellular protein transport (GO:0006886);; Biological Process: nucleocytoplasmic transport (GO:0006913);; Biological Process: small GTPase mediated signal transduction (GO:0007264);;	K07936|2.15718e-40|mdm:103456172|GTP-binding nuclear protein Ran-B1-like; K07936 GTP-binding nuclear protein Ran (A)	Ribosome biogenesis in eukaryotes (ko03008);; RNA transport (ko03013)	GTP-binding nuclear protein Ran-B1 GN=RAN-B1 OS=Nicotiana tabacum (Common tobacco) PE=2 SV=1	U	Intracellular trafficking, secretion, and vesicular transport	PREDICTED: GTP-binding nuclear protein Ran-B1-like [Malus domestica]	molecular function: binding (GO:0005488);; molecular function: catalytic activity (GO:0003824);; biological process: metabolic process (GO:0008152);; biological process: localization (GO:0051179);; biological process: signaling (GO:0023052);; biological process: response to stimulus (GO:0050896);; biological process: single-organism process (GO:0044699);; biological process: biological regulation…
jujube_newGene_1340	3.02831	0	0	--	--	--	Molecular Function: oxidoreductase activity (GO:0016491);;	--	--	Pentatricopeptide repeat-containing protein At5g16420, mitochondrial (Precursor) GN=At5g16420 OS=Arabidopsis thaliana (Mouse-ear cress) PE=2 SV=1	R	General function prediction only	hypothetical protein L484_027142 [Morus notabilis]	molecular function: catalytic activity (GO:0003824);; biological process: metabolic process (GO:0008152);;
jujube_newGene_1348	3.63429	0.679932	0.672354	--	[C]	Energy production and conversion	Biological Process: auxin-activated signaling pathway (GO:0009734);; Molecular Function: oxidoreductase activity (GO:0016491);; Biological Process: oxidation-reduction process (GO:0055114);;	--	--	Auxin-induced protein PCNT115 OS=Nicotiana tabacum (Common tobacco) PE=2 SV=1	C	Energy production and conversion	Auxin-induced protein [Aegilops tauschii]	biological process: metabolic process (GO:0008152);; biological process: signaling (GO:0023052);; biological process: response to stimulus (GO:0050896);; biological process: single-organism process (GO:0044699);; biological process: cellular process (GO:0009987);; biological process: biological regulation (GO:0065007);; molecular function: catalytic activity (GO:0003824);;
jujube_newGene_1436	379.59	187.068	234.209	--	--	--	--	--	--	--	--	--	--	--
jujube_newGene_1446	1.93409	0.396241	0.29178	--	--	--	Cellular Component: chloroplast (GO:0009507);; Cellular Component: plastid outer membrane (GO:0009527);; Molecular Function: transferase activity, transferring glycosyl groups (GO:0016757);;	K09480|4.12414e-47|mdm:103446060|digalactosyldiacylglycerol synthase 2, chloroplastic; K09480 digalactosyldiacylglycerol synthase [EC:2.4.1.241] (A)	Glycerolipid metabolism (ko00561)	Digalactosyldiacylglycerol synthase 2, chloroplastic GN=DGD2 OS=Lotus japonicus (Lotus corniculatus var. japonicus) PE=2 SV=1	M	Cell wall/membrane/envelope biogenesis	PREDICTED: digalactosyldiacylglycerol synthase 2, chloroplastic [Malus domestica]	biological process: metabolic process (GO:0008152);; molecular function: catalytic activity (GO:0003824);; cellular component: membrane (GO:0016020);; cellular component: organelle part (GO:0044422);; cellular component: cell part (GO:0044464);; cellular component: cell (GO:0005623);; cellular component: organelle (GO:0043226);;
jujube_newGene_1571	1.24745	0.50846	0.635689	--	--	--	--	K17776|8.19816e-10|pxb:103937040|mitochondrial outer membrane import complex protein METAXIN-like; K17776 metaxin (A)	--	Mitochondrial outer membrane import complex protein METAXIN GN=MTX1 OS=Arabidopsis thaliana (Mouse-ear cress) PE=1 SV=1	U	Intracellular trafficking, secretion, and vesicular transport	PREDICTED: mitochondrial outer membrane import complex protein METAXIN-like [Pyrus x bretschneideri]	--
jujube_newGene_1585	3.34875	1.31613	1.8394	--	--	--	Biological Process: sister chromatid cohesion (GO:0007062);; Cellular Component: intracellular organelle (GO:0043229);;	K11269|1.25412e-41|rcu:RCOM_1020420|chromosome transmission fidelity factor, putative; K11269 chromosome transmission fidelity protein 18 (A)	--	Pentatricopeptide repeat-containing protein At4g35850, mitochondrial (Precursor) GN=At4g35850 OS=Arabidopsis thaliana (Mouse-ear cress) PE=2 SV=1	O	Posttranslational modification, protein turnover, chaperones	chromosome transmission fidelity factor, putative [Ricinus communis]	cellular component: cell part (GO:0044464);; cellular component: cell (GO:0005623);; cellular component: organelle (GO:0043226);; biological process: cellular process (GO:0009987);; biological process: cellular component organization or biogenesis (GO:0071840);; biological process: single-organism process (GO:0044699);;
jujube_newGene_1598	1.16286	0	0.00730694	--	--	--	--	--	--	Oxysterol-binding protein-related protein 1C GN=ORP1C OS=Arabidopsis thaliana (Mouse-ear cress) PE=2 SV=1	T	Signal transduction mechanisms	hypothetical protein CISIN_1g0036641mg, partial [Citrus sinensis]	--
jujube_newGene_1749	3.3619	1.5961	1.81939	--	[O]	Posttranslational modification, protein turnover, chaperones	Molecular Function: ATP binding (GO:0005524);; Cellular Component: cell wall (GO:0005618);; Cellular Component: nucleolus (GO:0005730);; Cellular Component: cytoplasm (GO:0005737);; Cellular Component: plasma membrane (GO:0005886);; Cellular Component: proteasome regulatory particle, base subcomplex (GO:0008540);; Molecular Function: nucleoside-triphosphatase activity (GO:0017111);; Biological Pr…	K03064|0|pop:POPTR_0004s16600g|POPTRDRAFT_648650; hypothetical protein; K03064 26S proteasome regulatory subunit T4 (A)	Proteasome (ko03050)	26S protease regulatory subunit S10B homolog B GN=RPT4B OS=Arabidopsis thaliana (Mouse-ear cress) PE=1 SV=1	O	Posttranslational modification, protein turnover, chaperones	hypothetical protein POPTR_0004s16600g [Populus trichocarpa]	molecular function: catalytic activity (GO:0003824);; molecular function: binding (GO:0005488);; biological process: metabolic process (GO:0008152);; cellular component: membrane (GO:0016020);; cellular component: organelle part (GO:0044422);; cellular component: cell part (GO:0044464);; cellular component: cell (GO:0005623);; cellular component: organelle (GO:0043226);; cellular component: macro…
jujube_newGene_1761	1.48574	0.483279	0.608374	--	--	--	--	--	--	--	--	--	--	--
jujube_newGene_1800	3.08438	1.48411	1.60794	--	--	--	--	--	--	--	--	--	--	--
jujube_newGene_1822	25.7469	0.319795	1.7225	--	--	--	--	--	--	--	--	--	--	--
jujube_newGene_1825	3.31843	0.661123	0.642157	--	--	--	--	--	--	--	S	Function unknown	unnamed protein product [Vitis vinifera]	--
jujube_newGene_1995	1.06612	0.319814	0.245536	--	--	--	--	K17402|3.70186e-35|vvi:100267719|uncharacterized LOC100267719; K17402 small subunit ribosomal protein S23 (A)	--	--	S	Function unknown	hypothetical protein VITISV_039509 [Vitis vinifera]	--
jujube_newGene_2082	2.12826	0	0.0342652	--	--	--	Molecular Function: nucleic acid binding (GO:0003676);; Molecular Function: zinc ion binding (GO:0008270);; Biological Process: positive regulation of cell proliferation (GO:0008284);;	K12819|7.23091e-80|sly:101252328|pre-mRNA-splicing factor SLU7-like; K12819 pre-mRNA-processing factor SLU7 (A)	Spliceosome (ko03040)	Pre-mRNA-splicing factor SLU7-A GN=At1g65660 OS=Arabidopsis thaliana (Mouse-ear cress) PE=1 SV=2	A	RNA processing and modification	unnamed protein product [Vitis vinifera]	molecular function: binding (GO:0005488);; biological process: biological regulation (GO:0065007);;
jujube_newGene_2102	1.27221	5.64343e-66	1.80678e-52	--	--	--	--	--	--	Pentatricopeptide repeat-containing protein At2g37230 GN=At2g37230 OS=Arabidopsis thaliana (Mouse-ear cress) PE=2 SV=1	R	General function prediction only	PREDICTED: pentatricopeptide repeat-containing protein At2g37230 [Cucumis melo]	--
jujube_newGene_2245	11.6208	4.43377	5.74878	--	--	--	--	--	--	--	R	General function prediction only	hypothetical protein L484_006995 [Morus notabilis]	--
jujube_newGene_2289	6.18583	2.50675	2.50495	--	--	--	--	--	--	--	--	--	--	--
jujube_newGene_2409	1.48899	0.00505647	0	--	--	--	Molecular Function: oxidoreductase activity, acting on a sulfur group of donors, NAD(P) as acceptor (GO:0016668);; Biological Process: oxidation-reduction process (GO:0055114);;	--	--	Pentatricopeptide repeat-containing protein At5g16420, mitochondrial (Precursor) GN=At5g16420 OS=Arabidopsis thaliana (Mouse-ear cress) PE=2 SV=1	R	General function prediction only	hypothetical protein L484_027142 [Morus notabilis]	molecular function: catalytic activity (GO:0003824);; biological process: single-organism process (GO:0044699);; biological process: metabolic process (GO:0008152);;
jujube_newGene_2435	2.76455	0.421813	0.85783	--	--	--	--	K02541|2.58191e-06|fve:101306501|DNA replication licensing factor MCM3 homolog; K02541 DNA replication licensing factor MCM3 [EC:3.6.4.12] (A)	DNA replication (ko03030)	DNA replication licensing factor MCM3 homolog 1 GN=ROA1 OS=Zea mays (Maize) PE=2 SV=2	--	--	--	--
jujube_newGene_2472	8.04615	1.01512	2.35355	--	--	--	--	--	--	Phytosulfokine-beta (Precursor) GN=PSK2 OS=Arabidopsis thaliana (Mouse-ear cress) PE=2 SV=1	S	Function unknown	Phytosulfokines 3 [Morus notabilis]	--
jujube_newGene_2524	10.5031	0	0	--	--	--	--	--	--	--	--	--	--	--
jujube_newGene_2548	4.58906	0	0.0491983	--	--	--	--	K17784|2.65455e-20|pper:PRUPE_ppa013917mg|hypothetical protein; K17784 mitochondrial inner membrane organizing system protein 1 (A)	--	--	S	Function unknown	hypothetical protein L484_008307 [Morus notabilis]	--
jujube_newGene_2635	7.4759	0	0	--	--	--	--	--	--	--	T	Signal transduction mechanisms	PREDICTED: putative disease resistance protein RGA4 [Prunus mume]	--
jujube_newGene_2906	22.9409	0.0570337	0.198924	--	--	--	Molecular Function: nucleic acid binding (GO:0003676);; Molecular Function: diacylglycerol O-acyltransferase activity (GO:0004144);; Molecular Function: ATP binding (GO:0005524);; Molecular Function: ATP-dependent helicase activity (GO:0008026);; Biological Process: glycerolipid biosynthetic process (GO:0045017);;	--	--	--	S	Function unknown	PREDICTED: O-acyltransferase WSD1-like [Fragaria vesca subsp. vesca]	biological process: single-organism process (GO:0044699);; biological process: metabolic process (GO:0008152);; biological process: cellular process (GO:0009987);; molecular function: binding (GO:0005488);; molecular function: catalytic activity (GO:0003824);;
jujube_newGene_2909	4.9612	1.34718	2.37374	--	--	--	Molecular Function: alpha-mannosidase activity (GO:0004559);; Cellular Component: vacuolar membrane (GO:0005774);; Biological Process: mannose metabolic process (GO:0006013);; Biological Process: cell adhesion (GO:0007155);; Molecular Function: zinc ion binding (GO:0008270);; Cellular Component: plant-type cell wall (GO:0009505);; Biological Process: vernalization response (GO:0010048);; Biologic…	--	--	Alpha-mannosidase, light subunit {ECO:0000303|PubMed:24221485} OS=Canavalia ensiformis (Jack bean) PE=1 SV=1	G	Carbohydrate transport and metabolism	unknown [Populus trichocarpa]	molecular function: binding (GO:0005488);; molecular function: catalytic activity (GO:0003824);; biological process: response to stimulus (GO:0050896);; biological process: biological adhesion (GO:0022610);; biological process: multicellular organismal process (GO:0032501);; biological process: biological regulation (GO:0065007);; biological process: metabolic process (GO:0008152);; biological pr…
jujube_newGene_2983	4.08461	1.6873	2.04714	--	--	--	--	--	--	--	S	Function unknown	PREDICTED: uncharacterized protein LOC103341134 [Prunus mume]	--
jujube_newGene_3059	15.2819	1.95536	5.21506	--	--	--	Biological Process: systemic acquired resistance (GO:0009627);; Biological Process: regulation of defense response (GO:0031347);; Biological Process: response to karrikin (GO:0080167);;	--	--	--	R	General function prediction only	hypothetical protein PRUPE_ppa014377mg [Prunus persica]	biological process: response to stimulus (GO:0050896);; biological process: multi-organism process (GO:0051704);; biological process: biological regulation (GO:0065007);; biological process: immune system process (GO:0002376);;
jujube_newGene_3066	2.92728	0.0336945	0.014791	--	--	--	--	--	--	--	I	Lipid transport and metabolism	VPS51/67 family protein, partial [Corchorus olitorius]	--
jujube_newGene_314	1.2764	0.574175	0.612247	--	--	--	Biological Process: ubiquitin-dependent protein catabolic process (GO:0006511);; Biological Process: photorespiration (GO:0009853);; Cellular Component: mitochondrial membrane (GO:0031966);; Cellular Component: respiratory chain complex I (GO:0045271);; Biological Process: response to misfolded protein (GO:0051788);; Biological Process: proteasome core complex assembly (GO:0080129);;	--	--	NADH dehydrogenase [ubiquinone] 1 beta subcomplex subunit 3-B GN=At1g14450 OS=Arabidopsis thaliana (Mouse-ear cress) PE=3 SV=1	S	Function unknown	hypothetical protein CARUB_v10010789mg, partial [Capsella rubella]	cellular component: membrane part (GO:0044425);; cellular component: macromolecular complex (GO:0032991);; cellular component: organelle (GO:0043226);; cellular component: cell part (GO:0044464);; cellular component: cell (GO:0005623);; cellular component: membrane (GO:0016020);; cellular component: organelle part (GO:0044422);; biological process: response to stimulus (GO:0050896);; biological p…
jujube_newGene_326	0.765092	0.0792588	0.111556	--	--	--	--	--	--	Putative disease resistance protein At4g11170 GN=At4g11170 OS=Arabidopsis thaliana (Mouse-ear cress) PE=2 SV=1	T	Signal transduction mechanisms	hypothetical protein PRUPE_ppa015427mg [Prunus persica]	--
jujube_newGene_346	40.9426	0.0207995	0.0147763	--	--	--	Molecular Function: magnesium ion transmembrane transporter activity (GO:0015095);; Biological Process: magnesium ion transport (GO:0015693);; Cellular Component: membrane (GO:0016020);;	--	--	Probable magnesium transporter NIPA3 GN=At1g34470 OS=Arabidopsis thaliana (Mouse-ear cress) PE=2 SV=1	S	Function unknown	hypothetical protein EUGRSUZ_B03722 [Eucalyptus grandis]	biological process: localization (GO:0051179);; biological process: single-organism process (GO:0044699);; biological process: cellular process (GO:0009987);; molecular function: transporter activity (GO:0005215);; cellular component: membrane (GO:0016020);;
jujube_newGene_347	14.6795	0	0	--	--	--	Molecular Function: magnesium ion transmembrane transporter activity (GO:0015095);; Biological Process: magnesium ion transport (GO:0015693);; Cellular Component: membrane (GO:0016020);;	--	--	Probable magnesium transporter NIPA3 GN=At1g34470 OS=Arabidopsis thaliana (Mouse-ear cress) PE=2 SV=1	S	Function unknown	PREDICTED: probable magnesium transporter NIPA7 [Populus euphratica]	cellular component: membrane (GO:0016020);; molecular function: transporter activity (GO:0005215);; biological process: single-organism process (GO:0044699);; biological process: localization (GO:0051179);; biological process: cellular process (GO:0009987);;
jujube_newGene_357	3.04543	0.996578	1.28536	--	--	--	--	K14016|5.12719e-55|pper:PRUPE_ppa008670mg|hypothetical protein; K14016 ubiquitin fusion degradation protein 1 (A)	Protein processing in endoplasmic reticulum (ko04141)	--	O	Posttranslational modification, protein turnover, chaperones	PREDICTED: ubiquitin fusion degradation protein 1 homolog isoform X2 [Pyrus x bretschneideri]	--
jujube_newGene_388	2.1726	0.342182	0.371914	--	[P]	Inorganic ion transport and metabolism	Molecular Function: DNA binding (GO:0003677);; Molecular Function: copper ion binding (GO:0005507);; Biological Process: glycolytic process (GO:0006096);; Biological Process: regulation of DNA replication (GO:0006275);; Biological Process: water transport (GO:0006833);; Biological Process: hyperosmotic response (GO:0006972);; Biological Process: Golgi organization (GO:0007030);; Biological Proces…	K00392|0|smo:SELMODRAFT_230718|hypothetical protein; K00392 sulfite reductase (ferredoxin) [EC:1.8.7.1] (A)	Sulfur metabolism (ko00920)	Sulfite reductase [ferredoxin], chloroplastic (Precursor) GN=SIR OS=Pisum sativum (Garden pea) PE=1 SV=2	P	Inorganic ion transport and metabolism	PREDICTED: sulfite reductase 1 [ferredoxin], chloroplastic-like [Sesamum indicum]	cellular component: extracellular region (GO:0005576);; cellular component: membrane (GO:0016020);; cellular component: organelle part (GO:0044422);; cellular component: organelle (GO:0043226);; cellular component: cell (GO:0005623);; cellular component: nucleoid (GO:0009295);; cellular component: cell part (GO:0044464);; biological process: biological regulation (GO:0065007);; biological process…
jujube_newGene_577	7.85777	2.82877	2.81558	--	--	--	--	--	--	Protein trichome birefringence-like 40 GN=TBL40 OS=Arabidopsis thaliana (Mouse-ear cress) PE=2 SV=2	R	General function prediction only	hypothetical protein JCGZ_24498 [Jatropha curcas]	--
jujube_newGene_704	3.89444	0.982578	0.758416	--	[CR]	Energy production and conversion;; General function prediction only	Molecular Function: zinc ion binding (GO:0008270);; Molecular Function: oxidoreductase activity (GO:0016491);; Biological Process: oxidation-reduction process (GO:0055114);;	--	--	2-methylene-furan-3-one reductase GN=EO OS=Fragaria ananassa (Strawberry) PE=1 SV=1	Q	Secondary metabolites biosynthesis, transport and catabolism	PREDICTED: 2-methylene-furan-3-one reductase-like [Prunus mume]	molecular function: catalytic activity (GO:0003824);; molecular function: binding (GO:0005488);; biological process: single-organism process (GO:0044699);; biological process: metabolic process (GO:0008152);;
jujube_newGene_745	4.37131	1.73642	1.9477	--	--	--	--	--	--	Putative disease resistance protein RGA1 GN=RGA1 OS=Solanum bulbocastanum (Wild potato) PE=2 SV=2	T	Signal transduction mechanisms	Putative disease resistance protein RGA1 [Morus notabilis]	--
jujube_newGene_958	3.28592	0	0.0219917	--	--	--	--	--	--	--	S	Function unknown	hypothetical protein POPTR_0001s26940g [Populus trichocarpa]	--
Profile 2
gene1003	49.0404	22.96	45.0384	LOC107418014	--	--	--	--	--	--	S	Function unknown	hypothetical protein L484_025980 [Morus notabilis]	--
gene10102	22.4291	10.8983	16.4981	LOC107417639	--	--	Biological Process: metabolic process (GO:0008152);; Cellular Component: chloroplast (GO:0009507);; Molecular Function: hydrolase activity (GO:0016787);;	--	--	--	R	General function prediction only	hypothetical protein PRUPE_ppa008292mg [Prunus persica]	cellular component: organelle (GO:0043226);; cellular component: cell part (GO:0044464);; cellular component: cell (GO:0005623);; molecular function: catalytic activity (GO:0003824);; biological process: metabolic process (GO:0008152);;
gene10421	2.72227	1.51432	4.10089	LOC107418008	[F]	Nucleotide transport and metabolism	Molecular Function: dCMP deaminase activity (GO:0004132);; Biological Process: metabolic process (GO:0008152);; Molecular Function: zinc ion binding (GO:0008270);;	K01493|4.88958e-128|pmum:103338069|deoxycytidylate deaminase; K01493 dCMP deaminase [EC:3.5.4.12] (A)	Pyrimidine metabolism (ko00240)	--	F	Nucleotide transport and metabolism	PREDICTED: deoxycytidylate deaminase [Prunus mume]	biological process: metabolic process (GO:0008152);; molecular function: catalytic activity (GO:0003824);; molecular function: binding (GO:0005488);;
gene10633	9.85606	3.45166	7.62174	LOC107418263	--	--	Molecular Function: pectate lyase activity (GO:0030570);;	K01728|0|gmx:100101868|PL2; pectate lyase precursor; K01728 pectate lyase [EC:4.2.2.2] (A)	Pentose and glucuronate interconversions (ko00040)	Probable pectate lyase 5 (Precursor) GN=At1g67750 OS=Arabidopsis thaliana (Mouse-ear cress) PE=2 SV=2	G	Carbohydrate transport and metabolism	hypothetical protein L484_018936 [Morus notabilis]	biological process: metabolic process (GO:0008152);; molecular function: catalytic activity (GO:0003824);;
gene10802	3.45289	0	2.51963	LOC107418476	--	--	--	--	--	Snakin-2 (Precursor) GN=SN2 OS=Solanum tuberosum (Potato) PE=1 SV=1	R	General function prediction only	hypothetical protein PRUPE_ppa019204mg [Prunus persica]	--
gene11022	1.73184	0.843921	2.18607	LOC107418686	--	--	--	--	--	Probable S-adenosylmethionine-dependent methyltransferase At5g38100 GN=At5g38100 OS=Arabidopsis thaliana (Mouse-ear cress) PE=2 SV=1	S	Function unknown	PREDICTED: probable S-adenosylmethionine-dependent methyltransferase At5g37990 [Prunus mume]	--
gene11182	1.74731	0.255599	0.923105	LOC107418854	--	--	Molecular Function: leucoanthocyanidin reductase activity (GO:0033788);; Biological Process: oxidation-reduction process (GO:0055114);;	K13081|4.18988e-180|pop:POPTR_0015s03360g|POPTRDRAFT_835080; hypothetical protein; K13081 leucoanthocyanidin reductase [EC:1.17.1.3] (A)	Flavonoid biosynthesis (ko00941)	Leucoanthocyanidin reductase GN=LAR OS=Desmodium uncinatum (Spanish clover) PE=1 SV=1	G	Carbohydrate transport and metabolism	hypothetical protein POPTR_0015s03360g [Populus trichocarpa]	molecular function: catalytic activity (GO:0003824);; biological process: single-organism process (GO:0044699);; biological process: metabolic process (GO:0008152);;
gene11248	1.62192	0.673688	1.52995	LOC107418920	--	--	--	--	--	Protein LONGIFOLIA 1 GN=T20K14.190 OS=Arabidopsis thaliana (Mouse-ear cress) PE=1 SV=1	S	Function unknown	PREDICTED: protein LONGIFOLIA 1 [Prunus mume]	--
gene1168	8.72757	1.55107	7.75268	LOC107419951	--	--	--	--	--	--	S	Function unknown	Sequence-specific DNA binding transcription factors, putative [Theobroma cacao]	--
gene11690	29.678	4.0114	13.7707	LOC107419406	--	--	--	--	--	--	R	General function prediction only	hypothetical protein JCGZ_20066 [Jatropha curcas]	--
gene12221	59.8188	29.4838	46.4361	LOC107419960	--	--	Cellular Component: peroxisome (GO:0005777);; Biological Process: fatty acid beta-oxidation (GO:0006635);; Biological Process: peroxisome organization (GO:0007031);; Cellular Component: chloroplast (GO:0009507);; Biological Process: gibberellin biosynthetic process (GO:0009686);; Biological Process: gibberellic acid mediated signaling pathway (GO:0009740);; Biological Process: seed germination (G…	--	--	--	I	Lipid transport and metabolism	PREDICTED: non-specific lipid-transfer protein-like [Brassica rapa]	cellular component: organelle (GO:0043226);; cellular component: cell part (GO:0044464);; cellular component: cell (GO:0005623);; biological process: response to stimulus (GO:0050896);; biological process: multicellular organismal process (GO:0032501);; biological process: biological regulation (GO:0065007);; biological process: reproductive process (GO:0022414);; biological process: single-organ…
gene1226	1.50258	0.973787	2.27679	LOC107419665	--	--	--	--	--	--	R	General function prediction only	PREDICTED: ankyrin repeat domain-containing protein 13C [Pyrus x bretschneideri]	--
gene12308	3.11776	0.747442	2.10543	LOC107420043	[M]	Cell wall/membrane/envelope biogenesis	Cellular Component: plasma membrane (GO:0005886);; Molecular Function: methyltransferase activity (GO:0008168);; Biological Process: lipid biosynthetic process (GO:0008610);; Biological Process: methylation (GO:0032259);;	--	--	(S)-coclaurine N-methyltransferase OS=Thalictrum flavum subsp. glaucum (Yellow meadow rue) PE=1 SV=1	R	General function prediction only	PREDICTED: (S)-coclaurine N-methyltransferase-like [Malus domestica]	molecular function: catalytic activity (GO:0003824);; biological process: single-organism process (GO:0044699);; biological process: metabolic process (GO:0008152);; cellular component: cell part (GO:0044464);; cellular component: cell (GO:0005623);; cellular component: membrane (GO:0016020);;
gene12515	2.98491	0.3027	1.45766	LOC107420326	--	--	--	--	--	Ethylene-responsive transcription factor ERF003 GN=ERF003 OS=Arabidopsis thaliana (Mouse-ear cress) PE=2 SV=1	K	Transcription	hypothetical protein PRUPE_ppa011795mg [Prunus persica]	--
gene12606	2.01595	0.81334	2.37958	LOC107420409	--	--	Biological Process: induced systemic resistance (GO:0009682);; Biological Process: response to ethylene (GO:0009723);;	--	--	Thaumatin-like protein (Precursor) GN=At1g18250 OS=Arabidopsis thaliana (Mouse-ear cress) PE=2 SV=2	R	General function prediction only	hypothetical protein POPTR_0002s02190g [Populus trichocarpa]	biological process: immune system process (GO:0002376);; biological process: response to stimulus (GO:0050896);; biological process: multi-organism process (GO:0051704);;
gene12801	25.1494	9.80815	17.3081	LOC107420623	--	--	Cellular Component: cell part (GO:0044464);; Biological Process: single-organism process (GO:0044699);; Biological Process: response to stimulus (GO:0050896);;	--	--	Zinc finger CCCH domain-containing protein 20 GN=At2g19810 OS=Arabidopsis thaliana (Mouse-ear cress) PE=2 SV=1	R	General function prediction only	PREDICTED: zinc finger CCCH domain-containing protein 23 [Vitis vinifera]	biological process: response to stimulus (GO:0050896);; biological process: single-organism process (GO:0044699);; cellular component: cell part (GO:0044464);;
gene1281	3.15958	0.948025	1.82188	LOC107419634	--	--	Molecular Function: DNA binding (GO:0003677);; Molecular Function: chromatin binding (GO:0003682);;	--	--	Transcription factor CPC GN=CPC OS=Arabidopsis thaliana (Mouse-ear cress) PE=1 SV=1	K	Transcription	PREDICTED: MYB-like transcription factor ETC1 [Eucalyptus grandis]	molecular function: binding (GO:0005488);;
gene12838	0.524557	0.265176	0.967758	LOC107420638	[C]	Energy production and conversion	Molecular Function: D-arabinono-1,4-lactone oxidase activity (GO:0003885);; Molecular Function: UDP-N-acetylmuramate dehydrogenase activity (GO:0008762);; Cellular Component: membrane (GO:0016020);; Biological Process: L-ascorbic acid biosynthetic process (GO:0019853);; Molecular Function: L-gulonolactone oxidase activity (GO:0050105);; Molecular Function: flavin adenine dinucleotide binding (GO:…	--	--	--	V	Defense mechanisms	PREDICTED: L-gulonolactone oxidase [Prunus mume]	molecular function: binding (GO:0005488);; molecular function: catalytic activity (GO:0003824);; biological process: metabolic process (GO:0008152);; biological process: single-organism process (GO:0044699);; biological process: cellular process (GO:0009987);; cellular component: membrane (GO:0016020);;
gene12868	6.07603	1.8391	7.9292	LOC107420697	--	--	--	--	--	Dehydration-responsive protein RD22 (Precursor) GN=RD22 OS=Arabidopsis thaliana (Mouse-ear cress) PE=2 SV=1	R	General function prediction only	PREDICTED: dehydration-responsive protein RD22-like [Pyrus x bretschneideri]	--
gene12910	35.6286	14.8818	24.0863	LOC107420744	--	--	--	--	--	--	--	--	--	--
gene13055	0.587742	0.287223	0.495825	LOC107420885	--	--	--	--	--	--	S	Function unknown	PREDICTED: uncharacterized protein LOC103320283 isoform X2 [Prunus mume]	--
gene13063	7.79007	0.547221	2.8721	LOC107420901	[R]	General function prediction only	Biological Process: metabolic process (GO:0008152);; Molecular Function: lipase activity (GO:0016298);; Molecular Function: carboxylic ester hydrolase activity (GO:0052689);;	--	--	Patatin-like protein 2 GN=PLP2 OS=Arabidopsis thaliana (Mouse-ear cress) PE=1 SV=1	I	Lipid transport and metabolism	Patatin group A-3 [Morus notabilis]	molecular function: catalytic activity (GO:0003824);; biological process: metabolic process (GO:0008152);;
gene13148	1.58822	0.571805	1.62311	LOC107421013	[K]	Transcription	Molecular Function: double-stranded DNA binding (GO:0003690);; Molecular Function: single-stranded DNA binding (GO:0003697);; Molecular Function: mRNA binding (GO:0003729);; Cellular Component: nucleolus (GO:0005730);; Cellular Component: cytoplasm (GO:0005737);; Cellular Component: plasma membrane (GO:0005886);; Biological Process: regulation of transcription, DNA-templated (GO:0006355);; Molecu…	--	--	Glycine-rich protein 2 GN=GRP-2 OS=Nicotiana sylvestris (Wood tobacco) PE=2 SV=1	J	Translation, ribosomal structure and biogenesis	PREDICTED: cold shock protein 2-like isoform X1 [Vitis vinifera]	molecular function: binding (GO:0005488);; biological process: metabolic process (GO:0008152);; biological process: single-organism process (GO:0044699);; biological process: reproductive process (GO:0022414);; biological process: developmental process (GO:0032502);; biological process: cellular process (GO:0009987);; biological process: response to stimulus (GO:0050896);; biological process: mul…
gene13192	44.5707	14.755	27.0763	LOC107421057	[R]	General function prediction only	--	--	--	Gibberellin 20 oxidase 1 GN=At4g25420 OS=Arabidopsis thaliana (Mouse-ear cress) PE=2 SV=2	Q	Secondary metabolites biosynthesis, transport and catabolism	hypothetical protein PRUPE_ppa007840mg [Prunus persica]	--
gene13458	1.69512	0.819491	2.1998	LOC107421353	[RTKL]	General function prediction only;; Signal transduction mechanisms;; Transcription;; Replication, recombination and repair	Biological Process: activation of MAPKK activity (GO:0000186);; Molecular Function: MAP kinase kinase kinase activity (GO:0004709);; Molecular Function: ATP binding (GO:0005524);;	--	--	Serine/threonine-protein kinase CTR1 GN=CTR1 OS=Arabidopsis thaliana (Mouse-ear cress) PE=1 SV=1	T	Signal transduction mechanisms	Serine/threonine-protein kinase [Morus notabilis]	molecular function: molecular transducer activity (GO:0060089);; molecular function: binding (GO:0005488);; molecular function: catalytic activity (GO:0003824);; biological process: biological regulation (GO:0065007);; biological process: cellular process (GO:0009987);; biological process: metabolic process (GO:0008152);; biological process: signaling (GO:0023052);; biological process: response t…
gene13648	65.3722	32.7924	72.9222	LOC107421563	[GEPR]	Carbohydrate transport and metabolism;; Amino acid transport and metabolism;; Inorganic ion transport and metabolism;; General function prediction only	Cellular Component: integral component of plasma membrane (GO:0005887);; Molecular Function: sucrose transmembrane transporter activity (GO:0008515);; Biological Process: sucrose transport (GO:0015770);; Biological Process: transmembrane transport (GO:0055085);;	K15378|0|cam:101495868|sucrose transport protein-like; K15378 solute carrier family 45, member 1/2/4 (A)	--	Sucrose transport protein SUC2 GN=T22J18.12 OS=Arabidopsis thaliana (Mouse-ear cress) PE=1 SV=2	G	Carbohydrate transport and metabolism	PREDICTED: sucrose transport protein-like [Cicer arietinum]	biological process: single-organism process (GO:0044699);; biological process: localization (GO:0051179);; biological process: cellular process (GO:0009987);; molecular function: transporter activity (GO:0005215);; cellular component: membrane part (GO:0044425);; cellular component: membrane (GO:0016020);; cellular component: cell (GO:0005623);; cellular component: cell part (GO:0044464);;
gene13700	8.65255	1.03129	3.16895	LOC107421635	--	--	--	--	--	Pathogen-related protein OS=Hordeum vulgare (Barley) PE=2 SV=2	S	Function unknown	putative pathogenesis-related family protein [Populus trichocarpa]	--
gene13772	130.784	56.3151	124.676	LOC107421693	--	--	Biological Process: response to stress (GO:0006950);;	--	--	--	R	General function prediction only	abscisic stress ripening protein [Ziziphus mauritiana]	biological process: response to stimulus (GO:0050896);;
gene13933	1.92595	0.90877	1.87205	LOC107421880	--	--	Biological Process: cellular macromolecule biosynthetic process (GO:0034645);; Biological Process: nucleic acid metabolic process (GO:0090304);;	K11296|1.33086e-77|pmum:103321110|high mobility group B protein 7-like; K11296 high mobility group protein B3 (A)	--	High mobility group B protein 7 GN=K19M13.4 OS=Arabidopsis thaliana (Mouse-ear cress) PE=1 SV=1	R	General function prediction only	PREDICTED: high mobility group B protein 7-like [Prunus mume]	biological process: metabolic process (GO:0008152);; biological process: cellular process (GO:0009987);;
gene13975	0.432819	0.132046	0.290257	LOC107421916	--	--	--	--	--	Disease resistance protein At4g27190 GN=At4g27190 OS=Arabidopsis thaliana (Mouse-ear cress) PE=2 SV=1	T	Signal transduction mechanisms	PREDICTED: disease resistance protein At4g27190-like [Fragaria vesca subsp. vesca]	--
gene1406	16.1588	6.70845	14.4234	LOC107422172	[C]	Energy production and conversion	Molecular Function: NADH dehydrogenase (ubiquinone) activity (GO:0008137);; Molecular Function: flavin adenine dinucleotide binding (GO:0050660);; Biological Process: oxidation-reduction process (GO:0055114);;	K17871|0|pper:PRUPE_ppa003771mg|hypothetical protein; K17871 NADH:ubiquinone reductase (non-electrogenic) [EC:1.6.5.9] (A)	--	Internal alternative NAD(P)H-ubiquinone oxidoreductase A2, mitochondrial (Precursor) GN=NDA2 OS=Arabidopsis thaliana (Mouse-ear cress) PE=2 SV=1	C	Energy production and conversion	hypothetical protein PRUPE_ppa003771mg [Prunus persica]	biological process: single-organism process (GO:0044699);; biological process: metabolic process (GO:0008152);; molecular function: binding (GO:0005488);; molecular function: catalytic activity (GO:0003824);;
gene14100	1.06995	0.477625	1.2122	LOC107422054	--	--	Molecular Function: transferase activity (GO:0016740);;	--	--	Crocetin glucosyltransferase, chloroplastic (Precursor) GN=UGT75L6 OS=Gardenia jasminoides (Cape jasmine) PE=1 SV=1	CG	Energy production and conversion;; Carbohydrate transport and metabolism	PREDICTED: anthocyanidin 3-O-glucoside 5-O-glucosyltransferase-like [Prunus mume]	biological process: metabolic process (GO:0008152);; molecular function: catalytic activity (GO:0003824);;
gene1431	0.312371	0.0970665	0.180635	LOC107422842	--	--	Cellular Component: extracellular region (GO:0005576);; Cellular Component: cell wall (GO:0005618);; Biological Process: unidimensional cell growth (GO:0009826);; Biological Process: plant-type cell wall loosening (GO:0009828);; Biological Process: plant-type cell wall modification involved in multidimensional cell growth (GO:0009831);; Cellular Component: membrane (GO:0016020);;	--	--	Expansin-A11 (Precursor) OS=Arabidopsis thaliana (Mouse-ear cress) PE=2 SV=1	R	General function prediction only	Alpha-expansin 11 precursor, putative [Ricinus communis]	biological process: growth (GO:0040007);; biological process: cellular process (GO:0009987);; biological process: cellular component organization or biogenesis (GO:0071840);; biological process: developmental process (GO:0032502);; biological process: single-organism process (GO:0044699);; cellular component: extracellular region (GO:0005576);; cellular component: membrane (GO:0016020);; cellular…
gene14358	4.52738	2.86889	6.65154	LOC107422347	--	--	--	--	--	Protein RALF-like 32 (Precursor) OS=Arabidopsis thaliana (Mouse-ear cress) PE=3 SV=1	T	Signal transduction mechanisms	hypothetical protein L484_026861 [Morus notabilis]	--
gene14375	33.0848	11.766	26.0601	LOC107422361	[MG]	Cell wall/membrane/envelope biogenesis;; Carbohydrate transport and metabolism	Molecular Function: nucleotide binding (GO:0000166);; Cellular Component: endosome (GO:0005768);; Cellular Component: trans-Golgi network (GO:0005802);; Biological Process: carbohydrate metabolic process (GO:0005975);; Biological Process: tryptophan catabolic process (GO:0006569);; Biological Process: nucleotide-sugar metabolic process (GO:0009225);; Biological Process: indoleacetic acid biosynth…	K08679|0|pper:PRUPE_ppa005434mg|hypothetical protein; K08679 UDP-glucuronate 4-epimerase [EC:5.1.3.6] (A)	Starch and sucrose metabolism (ko00500);; Amino sugar and nucleotide sugar metabolism (ko00520)	UDP-glucuronate 4-epimerase 6 GN=F14O13.1 OS=Arabidopsis thaliana (Mouse-ear cress) PE=1 SV=1	G	Carbohydrate transport and metabolism	hypothetical protein PRUPE_ppa005434mg [Prunus persica]	cellular component: cell (GO:0005623);; cellular component: cell part (GO:0044464);; cellular component: organelle (GO:0043226);; cellular component: organelle part (GO:0044422);; biological process: metabolic process (GO:0008152);; biological process: single-organism process (GO:0044699);; biological process: biological regulation (GO:0065007);; biological process: cellular process (GO:0009987);…
gene14492	12.914	5.12367	11.4856	LOC107422483	--	--	--	--	--	BAHD acyltransferase At5g47980 GN=BAHD1 OS=Arabidopsis thaliana (Mouse-ear cress) PE=2 SV=1	S	Function unknown	PREDICTED: BAHD acyltransferase At5g47980-like isoform X2 [Pyrus x bretschneideri]	--
gene14659	1.97777	0.515857	1.09364	LOC107422698	--	--	--	--	--	--	S	Function unknown	PREDICTED: uncharacterized protein LOC103331679 [Prunus mume]	--
gene14797	3.0828	1.46135	2.45141	LOC107422832	--	--	Molecular Function: DNA binding (GO:0003677);; Cellular Component: nucleus (GO:0005634);; Biological Process: double-strand break repair (GO:0006302);; Biological Process: DNA recombination (GO:0006310);;	K10886|5.31301e-127|cit:102621916|DNA repair protein XRCC4-like; K10886 DNA-repair protein XRCC4 (A)	Non-homologous end-joining (ko03450)	DNA repair protein XRCC4 GN=XRCC4 OS=Arabidopsis thaliana (Mouse-ear cress) PE=1 SV=2	L	Replication, recombination and repair	DNA repair protein XRCC4 [Morus notabilis]	cellular component: organelle (GO:0043226);; cellular component: cell (GO:0005623);; cellular component: cell part (GO:0044464);; biological process: single-organism process (GO:0044699);; biological process: response to stimulus (GO:0050896);; biological process: metabolic process (GO:0008152);; biological process: cellular process (GO:0009987);; molecular function: binding (GO:0005488);;
gene14915	13.4042	4.59194	8.11241	LOC107422960	--	--	--	--	--	--	S	Function unknown	PREDICTED: uncharacterized protein LOC101298363 [Fragaria vesca subsp. vesca]	--
gene15227	90.9161	39.5233	72.4219	LOC107423309	[GEPR]	Carbohydrate transport and metabolism;; Amino acid transport and metabolism;; Inorganic ion transport and metabolism;; General function prediction only	Molecular Function: sugar:proton symporter activity (GO:0005351);; Cellular Component: integral component of membrane (GO:0016021);; Biological Process: carbohydrate transmembrane transport (GO:0034219);;	--	--	Sugar transporter ERD6-like 16 GN=At5g18840 OS=Arabidopsis thaliana (Mouse-ear cress) PE=2 SV=2	R	General function prediction only	hypothetical protein PRUPE_ppa004636mg [Prunus persica]	cellular component: membrane part (GO:0044425);; cellular component: membrane (GO:0016020);; molecular function: transporter activity (GO:0005215);; biological process: single-organism process (GO:0044699);; biological process: localization (GO:0051179);; biological process: cellular process (GO:0009987);;
gene15309	0.4831	0.15633	0.376399	LOC107423406	--	--	--	--	--	Protein ROOT PRIMORDIUM DEFECTIVE 1 GN=RPD1 OS=Arabidopsis thaliana (Mouse-ear cress) PE=1 SV=1	S	Function unknown	PREDICTED: protein ROOT PRIMORDIUM DEFECTIVE 1-like [Malus domestica]	--
gene15410	1.56945	0.613408	3.40291	LOC107423518	--	--	--	--	--	Rhodanese-like domain-containing protein 6 GN=STR6 OS=Arabidopsis thaliana (Mouse-ear cress) PE=2 SV=1	E	Amino acid transport and metabolism	PREDICTED: dihydrofolate reductase-like [Populus euphratica]	--
gene16110	2.19012	0.816761	4.10754	LOC107424275	[I]	Lipid transport and metabolism	Molecular Function: hydroxymethylglutaryl-CoA reductase (NADPH) activity (GO:0004420);; Cellular Component: endoplasmic reticulum membrane (GO:0005789);; Biological Process: isoprenoid biosynthetic process (GO:0008299);; Biological Process: coenzyme A metabolic process (GO:0015936);; Cellular Component: integral component of membrane (GO:0016021);; Molecular Function: NADP binding (GO:0050661);; …	K00021|0|sot:102599791|hmg1; 3-hydroxy-3-methylglutaryl-coenzyme A reductase 1-like; K00021 hydroxymethylglutaryl-CoA reductase (NADPH) [EC:1.1.1.34] (A)	Terpenoid backbone biosynthesis (ko00900)	3-hydroxy-3-methylglutaryl-coenzyme A reductase 1 GN=HMG1 OS=Solanum tuberosum (Potato) PE=2 SV=1	I	Lipid transport and metabolism	3-hydroxy-3-methylglutaryl coenzyme A reductase [Camellia sinensis]	biological process: metabolic process (GO:0008152);; biological process: single-organism process (GO:0044699);; biological process: cellular process (GO:0009987);; molecular function: catalytic activity (GO:0003824);; molecular function: binding (GO:0005488);; cellular component: organelle (GO:0043226);; cellular component: cell (GO:0005623);; cellular component: cell part (GO:0044464);; cellular…
gene16129	49.5534	20.3202	41.9204	LOC107424257	[R]	General function prediction only	Molecular Function: oxidoreductase activity, acting on single donors with incorporation of molecular oxygen, incorporation of two atoms of oxygen (GO:0016702);; Molecular Function: gibberellin 3-beta-dioxygenase activity (GO:0016707);; Biological Process: oxidation-reduction process (GO:0055114);;	--	--	2-oxoglutarate-dependent dioxygenase DAO GN=OSJNBa0022H21.12 OS=Oryza sativa subsp. japonica (Rice) PE=2 SV=2	Q	Secondary metabolites biosynthesis, transport and catabolism	hypothetical protein PRUPE_ppa009067mg [Prunus persica]	molecular function: catalytic activity (GO:0003824);; biological process: single-organism process (GO:0044699);; biological process: metabolic process (GO:0008152);;
gene16137	1.869	0.704799	1.35801	LOC107424266	[G]	Carbohydrate transport and metabolism	Molecular Function: ribokinase activity (GO:0004747);; Biological Process: D-ribose metabolic process (GO:0006014);; Molecular Function: fructokinase activity (GO:0008865);; Cellular Component: chloroplast (GO:0009507);; Biological Process: phosphorylation (GO:0016310);;	K00847|0|pper:PRUPE_ppa008482mg|hypothetical protein; K00847 fructokinase [EC:2.7.1.4] (A)	Fructose and mannose metabolism (ko00051);; Starch and sucrose metabolism (ko00500);; Amino sugar and nucleotide sugar metabolism (ko00520)	Probable fructokinase-5 OS=Arabidopsis thaliana (Mouse-ear cress) PE=2 SV=1	G	Carbohydrate transport and metabolism	hypothetical protein PRUPE_ppa008482mg [Prunus persica]	cellular component: organelle (GO:0043226);; cellular component: cell part (GO:0044464);; cellular component: cell (GO:0005623);; biological process: single-organism process (GO:0044699);; biological process: metabolic process (GO:0008152);; biological process: cellular process (GO:0009987);; molecular function: catalytic activity (GO:0003824);;
gene16343	7.47131	2.55127	8.73912	LOC107424505	[RTKL]	General function prediction only;; Signal transduction mechanisms;; Transcription;; Replication, recombination and repair	Biological Process: MAPK cascade (GO:0000165);; Molecular Function: nucleotide binding (GO:0000166);; Molecular Function: protein serine/threonine kinase activity (GO:0004674);; Biological Process: protein phosphorylation (GO:0006468);;	--	--	Mitogen-activated protein kinase kinase kinase NPK1 GN=NPK1 OS=Nicotiana tabacum (Common tobacco) PE=1 SV=1	T	Signal transduction mechanisms	hypothetical protein PRUPE_ppa007987mg [Prunus persica]	molecular function: binding (GO:0005488);; molecular function: catalytic activity (GO:0003824);; biological process: biological regulation (GO:0065007);; biological process: cellular process (GO:0009987);; biological process: metabolic process (GO:0008152);; biological process: signaling (GO:0023052);; biological process: response to stimulus (GO:0050896);; biological process: single-organism pro…
gene1664	10.7172	5.56365	15.2424	LOC107425063	--	--	Molecular Function: DNA binding (GO:0003677);; Cellular Component: nucleus (GO:0005634);;	--	--	Squamosa promoter-binding protein 1 GN=SBP1 OS=Antirrhinum majus (Garden snapdragon) PE=2 SV=1	K	Transcription	PREDICTED: squamosa promoter-binding-like protein 3 [Prunus mume]	molecular function: binding (GO:0005488);; cellular component: organelle (GO:0043226);; cellular component: cell part (GO:0044464);; cellular component: cell (GO:0005623);;
gene1674	33.1643	18.597	42.0611	LOC107425282	--	--	--	--	--	Ethylene-responsive transcription factor 4 GN=ERF4 OS=Nicotiana sylvestris (Wood tobacco) PE=2 SV=1	K	Transcription	Ethylene-responsive transcription factor 4 [Morus notabilis]	--
gene16993	4.08458	1.57357	5.68596	LOC107425185	--	--	--	--	--	--	S	Function unknown	hypothetical protein L484_022121 [Morus notabilis]	--
gene17169	7.84779	3.20156	5.48785	LOC107425381	[P]	Inorganic ion transport and metabolism	Molecular Function: voltage-gated chloride channel activity (GO:0005247);; Biological Process: chloride transport (GO:0006821);; Cellular Component: plant-type vacuole membrane (GO:0009705);; Cellular Component: integral component of membrane (GO:0016021);; Molecular Function: adenyl nucleotide binding (GO:0030554);; Biological Process: transmembrane transport (GO:0055085);;	K05016|0|pop:POPTR_0003s00940g|Chloride channel protein CLC-c; K05016 chloride channel 7 (A)	--	Chloride channel protein CLC-c GN=K9P8.3 OS=Arabidopsis thaliana (Mouse-ear cress) PE=1 SV=1	P	Inorganic ion transport and metabolism	Chloride channel protein CLC-c [Morus notabilis]	biological process: cellular process (GO:0009987);; biological process: biological regulation (GO:0065007);; biological process: localization (GO:0051179);; biological process: single-organism process (GO:0044699);; molecular function: binding (GO:0005488);; molecular function: transporter activity (GO:0005215);; cellular component: membrane part (GO:0044425);; cellular component: membrane (GO:00…
gene17178	1.41001	0.658372	1.40287	LOC107425397	[O]	Posttranslational modification, protein turnover, chaperones	Biological Process: protein peptidyl-prolyl isomerization (GO:0000413);; Molecular Function: peptidyl-prolyl cis-trans isomerase activity (GO:0003755);; Biological Process: protein folding (GO:0006457);; Cellular Component: chloroplast thylakoid membrane (GO:0009535);; Cellular Component: chloroplast thylakoid lumen (GO:0009543);; Cellular Component: NAD(P)H dehydrogenase complex (plastoquinone) …	K01802|1.18821e-105|pop:POPTR_0005s08150g|POPTRDRAFT_715944; immunophilin family protein; K01802 peptidylprolyl isomerase [EC:5.2.1.8] (A)	--	Peptidyl-prolyl cis-trans isomerase FKBP16-2, chloroplastic (Precursor) GN=At4g39710 OS=Arabidopsis thaliana (Mouse-ear cress) PE=1 SV=1	O	Posttranslational modification, protein turnover, chaperones	Peptidyl-prolyl cis-trans isomerase FKBP16-2 [Morus notabilis]	biological process: cellular process (GO:0009987);; biological process: metabolic process (GO:0008152);; biological process: single-organism process (GO:0044699);; molecular function: catalytic activity (GO:0003824);; cellular component: membrane (GO:0016020);; cellular component: organelle part (GO:0044422);; cellular component: cell (GO:0005623);; cellular component: cell part (GO:0044464);; ce…
gene17507	6.14395	0.451744	1.96434	LOC107425754	[KAD]	Transcription;; RNA processing and modification;; Cell cycle control, cell division, chromosome partitioning	Molecular Function: binding (GO:0005488);;	K09422|3.0475e-97|tcc:TCM_004046|Myb domain protein 13, putative; K09422 myb proto-oncogene protein, plant (A)	--	Myb-related protein Myb4 GN=OSJNBa0073E02.6 OS=Oryza sativa subsp. japonica (Rice) PE=2 SV=2	K	Transcription	Myb domain protein 13, putative [Theobroma cacao]	molecular function: binding (GO:0005488);;
gene1794	2.27273	0.958881	1.71381	LOC107426438	--	--	Cellular Component: chloroplast (GO:0009507);;	K15032|3.86818e-143|vvi:100254596|uncharacterized LOC100254596; K15032 mTERF domain-containing protein, mitochondrial (A)	--	--	K	Transcription	PREDICTED: uncharacterized protein LOC100254596 [Vitis vinifera]	cellular component: organelle (GO:0043226);; cellular component: cell (GO:0005623);; cellular component: cell part (GO:0044464);;
gene18223	2.88242	1.41376	2.57922	LOC107426771	[H]	Coenzyme transport and metabolism	Molecular Function: pantoate-beta-alanine ligase activity (GO:0004592);; Biological Process: pantothenate biosynthetic process (GO:0015940);;	K01918|0|fve:101298957|pantoate--beta-alanine ligase-like; K01918 pantoate--beta-alanine ligase [EC:6.3.2.1] (A)	beta-Alanine metabolism (ko00410);; Pantothenate and CoA biosynthesis (ko00770)	Pantoate--beta-alanine ligase (Precursor) GN=PANC OS=Lotus japonicus (Lotus corniculatus var. japonicus) PE=1 SV=3	H	Coenzyme transport and metabolism	Pantoate--beta-alanine ligase [Morus notabilis]	molecular function: catalytic activity (GO:0003824);; biological process: metabolic process (GO:0008152);; biological process: single-organism process (GO:0044699);; biological process: cellular process (GO:0009987);;
gene18263	79.555	14.3804	43.7101	LOC107426602	[O]	Posttranslational modification, protein turnover, chaperones	--	K12160|1.86797e-58|vvi:100263999|small ubiquitin-related modifier 2-like; K12160 small ubiquitin-related modifier (A)	RNA transport (ko03013)	Small ubiquitin-related modifier 2 GN=MCO15.11 OS=Arabidopsis thaliana (Mouse-ear cress) PE=1 SV=1	O	Posttranslational modification, protein turnover, chaperones	Small ubiquitin-related modifier 2 [Morus notabilis]	--
gene18390	45.1458	0.370494	6.39972	LOC107426650	--	--	Biological Process: regulation of transcription, DNA-templated (GO:0006355);; Molecular Function: zinc ion binding (GO:0008270);; Molecular Function: histone binding (GO:0042393);;	--	--	PHD finger protein Alfin1 GN=ALFIN-1 OS=Medicago sativa (Alfalfa) PE=1 SV=1	K	Transcription	PREDICTED: PHD finger protein ALFIN-LIKE 7 [Tarenaya hassleriana]	biological process: biological regulation (GO:0065007);; molecular function: binding (GO:0005488);;
gene18421	14.0271	3.38721	14.0018	LOC107426617	--	--	--	K14488|4.09265e-72|pper:PRUPE_ppa012885mg|hypothetical protein; K14488 SAUR family protein (A)	Plant hormone signal transduction (ko04075)	Indole-3-acetic acid-induced protein ARG7 GN=ARG7 OS=Vigna radiata var. radiata (Mung bean) PE=2 SV=1	S	Function unknown	hypothetical protein PRUPE_ppa012885mg [Prunus persica]	--
gene18555	2.84306	1.40029	2.13533	LOC107426883	--	--	Cellular Component: plasmodesma (GO:0009506);; Cellular Component: chloroplast (GO:0009507);; Biological Process: embryo development ending in seed dormancy (GO:0009793);;	K15032|0|vvi:100852464|uncharacterized LOC100852464; K15032 mTERF domain-containing protein, mitochondrial (A)	--	--	K	Transcription	hypothetical protein L484_018547 [Morus notabilis]	cellular component: cell (GO:0005623);; cellular component: cell part (GO:0044464);; cellular component: organelle (GO:0043226);; cellular component: cell junction (GO:0030054);; biological process: developmental process (GO:0032502);; biological process: multicellular organismal process (GO:0032501);; biological process: reproductive process (GO:0022414);; biological process: single-organism pro…
gene18672	0.562541	0.24556	0.440222	LOC107426992	--	--	--	K15923|0|pmum:103335168|alpha-L-fucosidase 2; K15923 alpha-L-fucosidase 2 [EC:3.2.1.51] (A)	Other glycan degradation (ko00511)	Alpha-L-fucosidase 2 (Precursor) GN=F10M10.30 OS=Arabidopsis thaliana (Mouse-ear cress) PE=1 SV=1	R	General function prediction only	PREDICTED: alpha-L-fucosidase 2 [Prunus mume]	--
gene18789	4.3718	2.53663	5.96989	LOC107427125	--	--	Biological Process: intracellular signal transduction (GO:0035556);; Molecular Function: metal ion binding (GO:0046872);; Molecular Function: protein-disulfide reductase activity (GO:0047134);; Biological Process: oxidation-reduction process (GO:0055114);;	--	--	--	S	Function unknown	PREDICTED: uncharacterized protein LOC103445306 [Malus domestica]	molecular function: catalytic activity (GO:0003824);; molecular function: binding (GO:0005488);; biological process: biological regulation (GO:0065007);; biological process: cellular process (GO:0009987);; biological process: single-organism process (GO:0044699);; biological process: response to stimulus (GO:0050896);; biological process: signaling (GO:0023052);; biological process: metabolic pro…
gene19141	7.00121	3.24024	8.63769	LOC107427494	[O]	Posttranslational modification, protein turnover, chaperones	Molecular Function: ubiquitin-protein transferase activity (GO:0004842);; Biological Process: protein ubiquitination (GO:0016567);; Biological Process: DNA endoreduplication (GO:0042023);; Biological Process: proteasome-mediated ubiquitin-dependent protein catabolic process (GO:0043161);; Biological Process: proteasome assembly (GO:0043248);; Biological Process: regulation of unidimensional cell …	K06689|4.64451e-100|pper:PRUPE_ppa012939mg|hypothetical protein; K06689 ubiquitin-conjugating enzyme E2 D/E [EC:6.3.2.19] (A)	Ubiquitin mediated proteolysis (ko04120);; Protein processing in endoplasmic reticulum (ko04141)	Ubiquitin-conjugating enzyme E2-17 kDa OS=Solanum lycopersicum (Tomato) PE=2 SV=1	O	Posttranslational modification, protein turnover, chaperones	hypothetical protein PRUPE_ppa012939mg [Prunus persica]	molecular function: catalytic activity (GO:0003824);; biological process: cellular component organization or biogenesis (GO:0071840);; biological process: cellular process (GO:0009987);; biological process: biological regulation (GO:0065007);; biological process: metabolic process (GO:0008152);; biological process: response to stimulus (GO:0050896);; biological process: single-organism process (G…
gene19638	9.72324	4.64035	7.33335	LOC107428059	--	--	--	--	--	--	R	General function prediction only	PREDICTED: non-specific lipid-transfer protein 4-like isoform 2 [Fragaria vesca subsp. vesca]	--
gene19830	1.52112	0.584722	1.07915	LOC107428271	[F]	Nucleotide transport and metabolism	Molecular Function: serine-tRNA ligase activity (GO:0004828);; Molecular Function: uridine kinase activity (GO:0004849);; Molecular Function: ATP binding (GO:0005524);; Cellular Component: cytoplasm (GO:0005737);; Biological Process: UMP biosynthetic process (GO:0006222);; Biological Process: seryl-tRNA aminoacylation (GO:0006434);; Biological Process: regulation of flower development (GO:0009909…	--	--	Putative uracil phosphoribosyltransferase GN=UKL3 OS=Arabidopsis thaliana (Mouse-ear cress) PE=2 SV=1	TZ	Signal transduction mechanisms;; Cytoskeleton	PREDICTED: uridine-cytidine kinase C [Prunus mume]	biological process: multicellular organismal process (GO:0032501);; biological process: biological regulation (GO:0065007);; biological process: developmental process (GO:0032502);; biological process: cellular component organization or biogenesis (GO:0071840);; biological process: cellular process (GO:0009987);; biological process: metabolic process (GO:0008152);; biological process: single-orga…
gene19988	0.63995	0.306603	0.499874	LOC107428463	[TK]	Signal transduction mechanisms;; Transcription	--	K14491|0|pmum:103321900|two-component response regulator ARR11; K14491 two-component response regulator ARR-B family (A)	Plant hormone signal transduction (ko04075)	Two-component response regulator ARR11 GN=F12A21.15 OS=Arabidopsis thaliana (Mouse-ear cress) PE=1 SV=1	K	Transcription	Two-component response regulator [Morus notabilis]	--
gene19991	20.4051	12.8294	25.6836	LOC107428462	--	--	--	--	--	--	O	Posttranslational modification, protein turnover, chaperones	hypothetical protein L484_027617 [Morus notabilis]	--
gene2024	16.346	3.22732	9.16928	LOC107428812	[E]	Amino acid transport and metabolism	Cellular Component: plasma membrane (GO:0005886);; Biological Process: oligopeptide transport (GO:0006857);; Biological Process: response to nitrate (GO:0010167);; Molecular Function: nitrate transmembrane transporter activity (GO:0015112);; Biological Process: nitrate transport (GO:0015706);; Biological Process: response to cadmium ion (GO:0046686);;	K14638|0|tcc:TCM_042339|Nitrate transporter 1.5; K14638 solute carrier family 15 (peptide/histidine transporter), member 3/4 (A)	--	Protein NRT1/ PTR FAMILY 7.3 GN=F5D14.23 OS=Arabidopsis thaliana (Mouse-ear cress) PE=1 SV=2	P	Inorganic ion transport and metabolism	Nitrate transporter 1.5 [Theobroma cacao]	cellular component: cell (GO:0005623);; cellular component: cell part (GO:0044464);; cellular component: membrane (GO:0016020);; molecular function: transporter activity (GO:0005215);; biological process: single-organism process (GO:0044699);; biological process: response to stimulus (GO:0050896);; biological process: localization (GO:0051179);; biological process: cellular process (GO:0009987);;
gene20324	3.31145	2.05608	4.61191	LOC107428807	[S]	Function unknown	--	--	--	--	S	Function unknown	PREDICTED: uncharacterized protein LOC103950879 [Pyrus x bretschneideri]	--
gene20351	7.55175	2.14681	4.4243	LOC107428827	--	--	Biological Process: pentose-phosphate shunt (GO:0006098);; Cellular Component: chloroplast thylakoid membrane (GO:0009535);; Biological Process: photosystem II assembly (GO:0010207);; Biological Process: isopentenyl diphosphate biosynthetic process, methylerythritol 4-phosphate pathway (GO:0019288);;	--	--	--	S	Function unknown	hypothetical protein JCGZ_15572 [Jatropha curcas]	biological process: metabolic process (GO:0008152);; biological process: single-organism process (GO:0044699);; biological process: cellular component organization or biogenesis (GO:0071840);; biological process: cellular process (GO:0009987);; cellular component: membrane (GO:0016020);; cellular component: organelle part (GO:0044422);; cellular component: organelle (GO:0043226);; cellular compon…
gene2078	4.79166	2.35737	3.98984	LOC107429767	--	--	Molecular Function: protein serine/threonine kinase activity (GO:0004674);; Molecular Function: ATP binding (GO:0005524);; Cellular Component: plasma membrane (GO:0005886);; Biological Process: brassinosteroid mediated signaling pathway (GO:0009742);; Biological Process: post-embryonic development (GO:0009791);; Biological Process: protein autophosphorylation (GO:0046777);; Biological Process: re…	--	--	Receptor-like protein kinase THESEUS 1 (Precursor) GN=THE1 OS=Arabidopsis thaliana (Mouse-ear cress) PE=1 SV=1	T	Signal transduction mechanisms	PREDICTED: receptor-like protein kinase THESEUS 1 [Pyrus x bretschneideri]	molecular function: catalytic activity (GO:0003824);; molecular function: binding (GO:0005488);; biological process: response to stimulus (GO:0050896);; biological process: biological regulation (GO:0065007);; biological process: multicellular organismal process (GO:0032501);; biological process: single-organism process (GO:0044699);; biological process: metabolic process (GO:0008152);; biologica…
gene2080	3.49167	0.798221	2.98713	LOC107429806	--	--	--	--	--	--	S	Function unknown	unnamed protein product [Coffea canephora]	--
gene20857	20.6824	6.05538	24.778	LOC107429356	--	--	--	--	--	--	S	Function unknown	Uncharacterized protein TCM_010809 [Theobroma cacao]	--
gene20978	13.732	2.68237	8.4707	LOC107429517	--	--	--	K09287|0|vvi:100262843|AP2/ERF and B3 domain-containing transcription factor RAV1-like; K09287 RAV-like factor (A)	--	AP2/ERF and B3 domain-containing transcription repressor TEM1 GN=TEM1 OS=Arabidopsis thaliana (Mouse-ear cress) PE=1 SV=1	K	Transcription	PREDICTED: AP2/ERF and B3 domain-containing transcription factor RAV1-like [Vitis vinifera]	--
gene21012	1.85965	0.573843	1.81755	LOC107429538	[R]	General function prediction only	--	--	--	Gibberellin 2-beta-dioxygenase 8 GN=GA2OX8 OS=Arabidopsis thaliana (Mouse-ear cress) PE=1 SV=2	Q	Secondary metabolites biosynthesis, transport and catabolism	Gibberellin 2-beta-dioxygenase 8 [Morus notabilis]	--
gene21045	4.34121	0.559607	10.8605	LOC107429601	[IQR]	Lipid transport and metabolism;; Secondary metabolites biosynthesis, transport and catabolism;; General function prediction only	--	K08081|4.02631e-131|pxb:103938136|tropinone reductase homolog; K08081 Tropinone reductase 1 [EC:1.1.1.206] (A)	Tropane, piperidine and pyridine alkaloid biosynthesis (ko00960)	Tropinone reductase homolog OS=Datura stramonium (Jimsonweed) PE=2 SV=1	Q	Secondary metabolites biosynthesis, transport and catabolism	PREDICTED: tropinone reductase homolog isoform X1 [Pyrus x bretschneideri]	--
gene21090	15.3887	6.82485	14.6844	LOC107429595	[O]	Posttranslational modification, protein turnover, chaperones	Molecular Function: electron carrier activity (GO:0009055);; Molecular Function: protein disulfide oxidoreductase activity (GO:0015035);; Biological Process: intracellular signal transduction (GO:0035556);; Biological Process: cell redox homeostasis (GO:0045454);; Biological Process: anther development (GO:0048653);;	--	--	--	O	Posttranslational modification, protein turnover, chaperones	hypothetical protein L484_014990 [Morus notabilis]	biological process: response to stimulus (GO:0050896);; biological process: biological regulation (GO:0065007);; biological process: signaling (GO:0023052);; biological process: metabolic process (GO:0008152);; biological process: reproductive process (GO:0022414);; biological process: single-organism process (GO:0044699);; biological process: developmental process (GO:0032502);; biological proce…
gene21098	0.889032	0.425384	1.30005	LOC107429592	[S]	Function unknown	--	--	--	TMV resistance protein N GN=N OS=Nicotiana glutinosa (Tobacco) PE=1 SV=1	T	Signal transduction mechanisms	PREDICTED: TMV resistance protein N-like [Malus domestica]	--
gene21181	0.579344	0.137747	0.621545	LOC107429742	[S]	Function unknown	--	--	--	TMV resistance protein N GN=N OS=Nicotiana glutinosa (Tobacco) PE=1 SV=1	T	Signal transduction mechanisms	TMV resistance protein N [Morus notabilis]	--
gene21505	2.17179	0.934112	3.58557	LOC107430091	--	--	Biological Process: oligopeptide transport (GO:0006857);; Molecular Function: oligopeptide transporter activity (GO:0015198);; Cellular Component: membrane (GO:0016020);; Biological Process: transmembrane transport (GO:0055085);;	--	--	Oligopeptide transporter 7 GN=OPT7 OS=Arabidopsis thaliana (Mouse-ear cress) PE=2 SV=1	T	Signal transduction mechanisms	hypothetical protein PRUPE_ppa001827mg [Prunus persica]	cellular component: membrane (GO:0016020);; biological process: single-organism process (GO:0044699);; biological process: localization (GO:0051179);; biological process: cellular process (GO:0009987);; molecular function: transporter activity (GO:0005215);;
gene21563	2.00358	0.729049	1.91894	LOC107430147	--	--	Biological Process: carbohydrate metabolic process (GO:0005975);; Molecular Function: cellulase activity (GO:0008810);; Molecular Function: carbohydrate binding (GO:0030246);;	--	--	Endoglucanase 6 (Precursor) GN=At1g64390 OS=Arabidopsis thaliana (Mouse-ear cress) PE=2 SV=2	G	Carbohydrate transport and metabolism	PREDICTED: endoglucanase 6-like [Populus euphratica]	biological process: metabolic process (GO:0008152);; molecular function: binding (GO:0005488);; molecular function: catalytic activity (GO:0003824);;
gene21599	37.6315	0	0.444396	LOC107430167	[J]	Translation, ribosomal structure and biogenesis	Cellular Component: ribosome (GO:0005840);;	K02947|2.23929e-68|pper:PRUPE_ppa012085mg|hypothetical protein; K02947 small subunit ribosomal protein S10e (A)	Ribosome (ko03010)	40S ribosomal protein S10 GN=OSJNBa0042L16.19 OS=Oryza sativa subsp. japonica (Rice) PE=2 SV=2	J	Translation, ribosomal structure and biogenesis	hypothetical protein PRUPE_ppa012085mg [Prunus persica]	cellular component: cell part (GO:0044464);; cellular component: cell (GO:0005623);; cellular component: organelle (GO:0043226);; cellular component: macromolecular complex (GO:0032991);;
gene21764	5.40721	1.54451	3.24728	LOC107430372	--	--	Cellular Component: extracellular region (GO:0005576);; Biological Process: sexual reproduction (GO:0019953);;	--	--	Expansin-like B1 (Precursor) GN=dl4545c OS=Arabidopsis thaliana (Mouse-ear cress) PE=2 SV=2	R	General function prediction only	Expansin-like protein [Morus notabilis]	cellular component: extracellular region (GO:0005576);; biological process: reproduction (GO:0000003);; biological process: reproductive process (GO:0022414);; biological process: multi-organism process (GO:0051704);;
gene21778	351.269	54.5793	163.418	LOC107430378	--	--	Molecular Function: DNA binding (GO:0003677);; Molecular Function: sequence-specific DNA binding transcription factor activity (GO:0003700);; Cellular Component: nucleus (GO:0005634);; Biological Process: regulation of transcription, DNA-templated (GO:0006355);;	K09286|2.54299e-82|csv:101227287|ethylene-responsive transcription factor 1A-like; K09286 EREBP-like factor (A)	--	Ethylene-responsive transcription factor 1A OS=Arabidopsis thaliana (Mouse-ear cress) PE=1 SV=2	K	Transcription	Ethylene-responsive transcription factor 2 [Morus notabilis]	molecular function: binding (GO:0005488);; molecular function: nucleic acid binding transcription factor activity (GO:0001071);; biological process: biological regulation (GO:0065007);; cellular component: organelle (GO:0043226);; cellular component: cell (GO:0005623);; cellular component: cell part (GO:0044464);;
gene21779	37.7889	15.6894	38.7039	LOC107430379	--	--	--	K09286|3.27482e-87|pmum:103337044|ethylene-responsive transcription factor 5; K09286 EREBP-like factor (A)	--	Ethylene-responsive transcription factor 6 OS=Arabidopsis thaliana (Mouse-ear cress) PE=2 SV=2	K	Transcription	PREDICTED: ethylene-responsive transcription factor 5 [Prunus mume]	--
gene21789	1.78054	0.665731	1.33497	LOC107430392	[R]	General function prediction only	Biological Process: response to wounding (GO:0009611);; Biological Process: anthocyanin-containing compound biosynthetic process (GO:0009718);; Molecular Function: oxidoreductase activity, acting on single donors with incorporation of molecular oxygen, incorporation of two atoms of oxygen (GO:0016702);; Molecular Function: leucocyanidin oxygenase activity (GO:0050589);; Biological Process: oxidat…	K05277|0|pop:POPTR_0003s11900g|POPTRDRAFT_646527; Leucoanthocyanidin dioxygenase family protein; K05277 leucoanthocyanidin dioxygenase [EC:1.14.11.19] (A)	Flavonoid biosynthesis (ko00941)	Leucoanthocyanidin dioxygenase GN=ANS OS=Malus domestica (Apple) PE=2 SV=1	H	Coenzyme transport and metabolism	anthocyanidin synthase [Ampelopsis grossedentata]	biological process: metabolic process (GO:0008152);; biological process: single-organism process (GO:0044699);; biological process: response to stimulus (GO:0050896);; molecular function: catalytic activity (GO:0003824);;
gene22030	3.60627	0.75548	4.46071	LOC107430649	--	--	--	--	--	--	R	General function prediction only	hypothetical protein JCGZ_25104 [Jatropha curcas]	--
gene22088	0.98476	0.521162	1.12776	LOC107430731	[GEPR]	Carbohydrate transport and metabolism;; Amino acid transport and metabolism;; Inorganic ion transport and metabolism;; General function prediction only	--	--	--	Probable anion transporter 3, chloroplastic (Precursor) GN=T8P21.3 OS=Arabidopsis thaliana (Mouse-ear cress) PE=2 SV=2	G	Carbohydrate transport and metabolism	putative anion transporter 3 [Morus notabilis]	--
gene2219	686.488	327.377	589.81	LOC107431323	--	--	--	--	--	--	S	Function unknown	hypothetical protein L484_021141 [Morus notabilis]	--
gene22255	0.814229	0.333431	0.539548	LOC107430905	--	--	--	--	--	Ethylene-overproduction protein 1 GN=ETO1 OS=Arabidopsis thaliana (Mouse-ear cress) PE=1 SV=2	R	General function prediction only	Tetratricopeptide repeat (TPR)-containing protein isoform 1 [Theobroma cacao]	--
gene22362	13.7058	1.63255	12.2764	LOC107431013	--	--	Biological Process: lipid transport (GO:0006869);; Molecular Function: lipid binding (GO:0008289);;	--	--	Non-specific lipid-transfer protein (Precursor) OS=Gossypium hirsutum (Upland cotton) PE=2 SV=1	T	Signal transduction mechanisms	lipid transfer protein precursor [Gossypium hirsutum]	biological process: single-organism process (GO:0044699);; biological process: localization (GO:0051179);; molecular function: binding (GO:0005488);;
gene2249	0.406295	0.212296	0.467272	LOC107431475	--	--	Molecular Function: nucleotide binding (GO:0000166);;	--	--	Disease resistance protein At4g27190 GN=At4g27190 OS=Arabidopsis thaliana (Mouse-ear cress) PE=2 SV=1	T	Signal transduction mechanisms	Disease resistance protein [Morus notabilis]	molecular function: binding (GO:0005488);;
gene2271	15.3009	5.40505	18.1071	LOC107431831	--	--	--	--	--	--	S	Function unknown	hypothetical protein L484_017842 [Morus notabilis]	--
gene22857	2.97622	1.4796	4.22833	LOC107431520	--	--	Molecular Function: zinc ion binding (GO:0008270);;	K11982|3.38466e-145|tcc:TCM_023780|RING-H2 finger C1A, putative; K11982 E3 ubiquitin-protein ligase RNF115/126 [EC:6.3.2.19] (A)	--	E3 ubiquitin-protein ligase RING1-like GN=At3g19950 OS=Arabidopsis thaliana (Mouse-ear cress) PE=1 SV=1	O	Posttranslational modification, protein turnover, chaperones	RING-H2 finger C1A, putative [Theobroma cacao]	molecular function: binding (GO:0005488);;
gene22861	75.0775	35.087	94.4052	LOC107431549	--	--	--	--	--	--	S	Function unknown	hypothetical protein VITISV_034276 [Vitis vinifera]	--
gene23514	26.1145	1.42725	6.25163	LOC107432247	[IQR]	Lipid transport and metabolism;; Secondary metabolites biosynthesis, transport and catabolism;; General function prediction only	Molecular Function: androstan-3-alpha,17-beta-diol dehydrogenase activity (GO:0047044);; Biological Process: oxidation-reduction process (GO:0055114);;	--	--	Secoisolariciresinol dehydrogenase (Fragment) OS=Podophyllum peltatum (Mayapple) PE=1 SV=1	Q	Secondary metabolites biosynthesis, transport and catabolism	PREDICTED: secoisolariciresinol dehydrogenase-like isoform X1 [Sesamum indicum]	biological process: single-organism process (GO:0044699);; biological process: metabolic process (GO:0008152);; molecular function: catalytic activity (GO:0003824);;
gene23700	33.1851	13.6871	31.061	LOC107432572	--	--	--	K09286|7.89724e-41|pper:PRUPE_ppa010982mg|hypothetical protein; K09286 EREBP-like factor (A)	--	Ethylene-responsive transcription factor 4 GN=At3g15210 OS=Arabidopsis thaliana (Mouse-ear cress) PE=1 SV=1	K	Transcription	hypothetical protein PRUPE_ppa010982mg [Prunus persica]	--
gene2373	1.06132	0.447522	0.899767	LOC107432913	--	--	--	--	--	--	S	Function unknown	PREDICTED: uncharacterized protein LOC103326446 isoform X2 [Prunus mume]	--
gene23960	21.4667	9.31668	14.422	LOC107432766	--	--	--	--	--	--	--	--	--	--
gene23996	3.76072	1.75431	5.60597	LOC107432793	--	--	Molecular Function: iron ion binding (GO:0005506);; Cellular Component: cytoplasm (GO:0005737);; Biological Process: inositol catabolic process (GO:0019310);; Molecular Function: inositol oxygenase activity (GO:0050113);; Biological Process: oxidation-reduction process (GO:0055114);;	K00469|0|pmum:103340787|inositol oxygenase 1-like; K00469 inositol oxygenase [EC:1.13.99.1] (A)	Ascorbate and aldarate metabolism (ko00053);; Inositol phosphate metabolism (ko00562)	Inositol oxygenase 4 GN=MIOX4 OS=Arabidopsis thaliana (Mouse-ear cress) PE=2 SV=1	R	General function prediction only	PREDICTED: inositol oxygenase 1-like [Prunus mume]	molecular function: catalytic activity (GO:0003824);; molecular function: binding (GO:0005488);; biological process: single-organism process (GO:0044699);; biological process: metabolic process (GO:0008152);; biological process: cellular process (GO:0009987);; cellular component: cell part (GO:0044464);; cellular component: cell (GO:0005623);;
gene24018	17.9127	5.21899	14.2954	LOC107432813	--	--	--	--	--	--	K	Transcription	PREDICTED: uncharacterized protein LOC103340804 [Prunus mume]	--
gene24195	1.32018	0.150088	0.697834	LOC107433022	[HE]	Coenzyme transport and metabolism;; Amino acid transport and metabolism	Molecular Function: phosphoglycerate dehydrogenase activity (GO:0004617);; Cellular Component: nucleus (GO:0005634);; Cellular Component: cytosol (GO:0005829);; Biological Process: L-serine biosynthetic process (GO:0006564);; Biological Process: tryptophan catabolic process (GO:0006569);; Biological Process: protein targeting to membrane (GO:0006612);; Cellular Component: chloroplast stroma (GO:0…	K00058|0|fve:101310343|d-3-phosphoglycerate dehydrogenase, chloroplastic-like; K00058 D-3-phosphoglycerate dehydrogenase [EC:1.1.1.95] (A)	Glycine, serine and threonine metabolism (ko00260);; Carbon metabolism (ko01200);; Biosynthesis of amino acids (ko01230)	D-3-phosphoglycerate dehydrogenase 2, chloroplastic (Precursor) GN=F11A6.8 OS=Arabidopsis thaliana (Mouse-ear cress) PE=1 SV=2	E	Amino acid transport and metabolism	PREDICTED: d-3-phosphoglycerate dehydrogenase, chloroplastic-like [Fragaria vesca subsp. vesca]	biological process: biological regulation (GO:0065007);; biological process: response to stimulus (GO:0050896);; biological process: cellular process (GO:0009987);; biological process: cellular component organization or biogenesis (GO:0071840);; biological process: single-organism process (GO:0044699);; biological process: multi-organism process (GO:0051704);; biological process: metabolic proces…
gene24339	14.4997	7.0498	16.1237	LOC107433232	--	--	--	--	--	Flowering-promoting factor 1-like protein 3 OS=Oryza sativa subsp. japonica (Rice) PE=2 SV=1	S	Function unknown	hypothetical protein POPTR_0010s02530g [Populus trichocarpa]	--
gene25168	4.63479	2.32175	7.49997	LOC107434092	--	--	--	--	--	--	R	General function prediction only	conserved hypothetical protein [Ricinus communis]	--
gene25440	9.0561	3.64063	5.99311	LOC107434401	--	--	--	--	--	--	--	--	--	--
gene2568	2.75825	1.31769	5.24523	LOC107435133	--	--	Molecular Function: hydrolase activity, acting on ester bonds (GO:0016788);;	--	--	GDSL esterase/lipase 1 (Precursor) GN=GLIP1 OS=Arabidopsis thaliana (Mouse-ear cress) PE=1 SV=1	I	Lipid transport and metabolism	hypothetical protein PRUPE_ppa024154mg [Prunus persica]	molecular function: catalytic activity (GO:0003824);; biological process: metabolic process (GO:0008152);;
gene25683	7.20318	3.31653	6.2809	LOC107434670	[O]	Posttranslational modification, protein turnover, chaperones	Molecular Function: serine-type endopeptidase activity (GO:0004252);; Biological Process: proteolysis (GO:0006508);; Cellular Component: plant-type cell wall (GO:0009505);; Molecular Function: identical protein binding (GO:0042802);; Biological Process: negative regulation of catalytic activity (GO:0043086);; Cellular Component: apoplast (GO:0048046);; Biological Process: mucilage metabolic proce…	--	--	Subtilisin-like protease (Precursor) GN=At5g67360 OS=Arabidopsis thaliana (Mouse-ear cress) PE=1 SV=1	O	Posttranslational modification, protein turnover, chaperones	Subtilase family protein [Theobroma cacao]	cellular component: cell (GO:0005623);; cellular component: cell part (GO:0044464);; cellular component: extracellular region (GO:0005576);; biological process: reproduction (GO:0000003);; biological process: biological regulation (GO:0065007);; biological process: multicellular organismal process (GO:0032501);; biological process: cellular process (GO:0009987);; biological process: metabolic pro…
gene25714	1.08093	0.521853	0.78478	LOC107434717	--	--	--	--	--	Pentatricopeptide repeat-containing protein At5g66520 GN=PCMP-H61 OS=Arabidopsis thaliana (Mouse-ear cress) PE=2 SV=1	R	General function prediction only	PREDICTED: pentatricopeptide repeat-containing protein At5g66520 isoform X1 [Vitis vinifera]	--
gene26315	0.954625	0.0477451	2.12346	LOC107435354	[Q]	Secondary metabolites biosynthesis, transport and catabolism	Molecular Function: copper ion binding (GO:0005507);; Biological Process: lignin catabolic process (GO:0046274);; Cellular Component: apoplast (GO:0048046);; Molecular Function: hydroquinone:oxygen oxidoreductase activity (GO:0052716);; Biological Process: oxidation-reduction process (GO:0055114);;	--	--	Putative laccase-9 (Precursor) OS=Oryza sativa subsp. japonica (Rice) PE=3 SV=1	Q	Secondary metabolites biosynthesis, transport and catabolism	PREDICTED: putative laccase-9 [Prunus mume]	cellular component: extracellular region (GO:0005576);; molecular function: binding (GO:0005488);; molecular function: catalytic activity (GO:0003824);; biological process: cellular process (GO:0009987);; biological process: metabolic process (GO:0008152);; biological process: single-organism process (GO:0044699);;
gene26489	0.634028	0.051211	0.32038	LOC107435537	--	--	Biological Process: zinc ion transport (GO:0006829);; Biological Process: single-organism cellular process (GO:0044763);;	--	--	--	S	Function unknown	hypothetical protein L484_019483 [Morus notabilis]	biological process: localization (GO:0051179);; biological process: single-organism process (GO:0044699);; biological process: cellular process (GO:0009987);;
gene26525	4.51357	2.13696	3.60024	LOC107435577	--	--	Molecular Function: ATP-dependent peptidase activity (GO:0004176);; Biological Process: proteolysis (GO:0006508);;	--	--	--	R	General function prediction only	PREDICTED: uncharacterized protein LOC101295420 [Fragaria vesca subsp. vesca]	biological process: single-organism process (GO:0044699);; biological process: metabolic process (GO:0008152);; biological process: cellular process (GO:0009987);; molecular function: catalytic activity (GO:0003824);;
gene26618	1.75242	0.888582	2.43719	LOC107435702	[S]	Function unknown	--	--	--	--	S	Function unknown	PREDICTED: uncharacterized protein LOC103331795 [Prunus mume]	--
gene26678	0.220335	0.00848707	0.0456358	LOC107435745	--	--	--	--	--	Receptor-like protein 12 (Precursor) GN=RLP12 OS=Arabidopsis thaliana (Mouse-ear cress) PE=2 SV=2	R	General function prediction only	leucine-rich repeat receptor protein kinase exs precursor, putative [Ricinus communis]	--
gene26886	59.728	39.8145	87.6755	LOC107435979	--	--	Cellular Component: plasma membrane (GO:0005886);; Biological Process: carbohydrate transport (GO:0008643);; Cellular Component: integral component of membrane (GO:0016021);;	K15382|4.24141e-135|gmx:100800304|bidirectional sugar transporter SWEET1-like; K15382 solute carrier family 50 (sugar transporter) (A)	--	Bidirectional sugar transporter SWEET1 GN=SWEET1 OS=Arabidopsis thaliana (Mouse-ear cress) PE=1 SV=1	P	Inorganic ion transport and metabolism	PREDICTED: bidirectional sugar transporter SWEET1 isoform X1 [Glycine max]	biological process: localization (GO:0051179);; biological process: single-organism process (GO:0044699);; cellular component: membrane part (GO:0044425);; cellular component: membrane (GO:0016020);; cellular component: cell (GO:0005623);; cellular component: cell part (GO:0044464);;
gene27336	1.36034	0.644188	0.987003	LOC107403720	[Q]	Secondary metabolites biosynthesis, transport and catabolism	Biological Process: polysaccharide biosynthetic process (GO:0000271);; Molecular Function: copper ion binding (GO:0005507);; Cellular Component: vacuolar membrane (GO:0005774);; Molecular Function: L-ascorbate oxidase activity (GO:0008447);; Cellular Component: plant-type cell wall (GO:0009505);; Cellular Component: plasmodesma (GO:0009506);; Biological Process: multidimensional cell growth (GO:0…	--	--	Monocopper oxidase-like protein SKU5 (Precursor) GN=SKU5 OS=Arabidopsis thaliana (Mouse-ear cress) PE=1 SV=1	Q	Secondary metabolites biosynthesis, transport and catabolism	Monocopper oxidase-like protein SKU5 [Morus notabilis]	cellular component: extracellular region (GO:0005576);; cellular component: cell part (GO:0044464);; cellular component: organelle part (GO:0044422);; cellular component: membrane part (GO:0044425);; cellular component: cell junction (GO:0030054);; cellular component: cell (GO:0005623);; cellular component: organelle (GO:0043226);; cellular component: membrane (GO:0016020);; molecular function: c…
gene27456	14.0319	0.000205239	0.916953	LOC107403852	--	--	--	--	--	E3 ubiquitin-protein ligase ATL4 GN=F27H5_10 OS=Arabidopsis thaliana (Mouse-ear cress) PE=1 SV=1	O	Posttranslational modification, protein turnover, chaperones	E3 ubiquitin-protein ligase ATL4 [Morus notabilis]	--
gene27579	9.41333	5.21559	14.7011	LOC107403986	[E]	Amino acid transport and metabolism	Molecular Function: lyase activity (GO:0016829);;	--	--	--	R	General function prediction only	PREDICTED: uncharacterized protein LOC104099009 [Nicotiana tomentosiformis]	biological process: metabolic process (GO:0008152);; molecular function: catalytic activity (GO:0003824);;
gene27811	0.296178	0.148574	0.471298	LOC107404234	--	--	--	--	--	Pentatricopeptide repeat-containing protein At4g37170 OS=Arabidopsis thaliana (Mouse-ear cress) PE=3 SV=1	R	General function prediction only	hypothetical protein PRUPE_ppa002292mg [Prunus persica]	--
gene28068	0.969638	0.281464	0.798475	LOC107404521	[G]	Carbohydrate transport and metabolism	Molecular Function: hydrolase activity, hydrolyzing O-glycosyl compounds (GO:0004553);; Biological Process: carbohydrate metabolic process (GO:0005975);;	K05350|0|pxb:103939399|beta-glucosidase 44-like; K05350 beta-glucosidase [EC:3.2.1.21] (A)	Cyanoamino acid metabolism (ko00460);; Starch and sucrose metabolism (ko00500);; Phenylpropanoid biosynthesis (ko00940)	Beta-glucosidase 44 (Precursor) GN=BGLU44 OS=Arabidopsis thaliana (Mouse-ear cress) PE=2 SV=1	G	Carbohydrate transport and metabolism	PREDICTED: beta-glucosidase 44-like [Pyrus x bretschneideri]	biological process: metabolic process (GO:0008152);; molecular function: catalytic activity (GO:0003824);;
gene28086	3.28714	0.93298	3.91266	LOC107404544	[TZDR]	Signal transduction mechanisms;; Cytoskeleton;; Cell cycle control, cell division, chromosome partitioning;; General function prediction only	Molecular Function: calcium ion binding (GO:0005509);;	K13448|1.7206e-50|mdm:103437550|putative calcium-binding protein CML19; K13448 calcium-binding protein CML (A)	Plant-pathogen interaction (ko04626)	Putative calcium-binding protein CML19 OS=Oryza sativa subsp. japonica (Rice) PE=3 SV=1	T	Signal transduction mechanisms	PREDICTED: putative calcium-binding protein CML19 [Malus domestica]	molecular function: binding (GO:0005488);;
gene28158	11.1786	5.50354	8.21552	LOC107404624	--	--	--	--	--	--	--	--	--	--
gene28171	18.0118	9.35428	20.5476	LOC107404649	--	--	Cellular Component: nucleus (GO:0005634);; Biological Process: response to ethylene (GO:0009723);; Cellular Component: SCF ubiquitin ligase complex (GO:0019005);;	K14515|0|rcu:RCOM_0224460|grr1, plant, putative; K14515 EIN3-binding F-box protein (A)	Plant hormone signal transduction (ko04075)	EIN3-binding F-box protein 1 GN=F13B15.15 OS=Arabidopsis thaliana (Mouse-ear cress) PE=1 SV=1	R	General function prediction only	hypothetical protein L484_002248 [Morus notabilis]	cellular component: macromolecular complex (GO:0032991);; cellular component: cell part (GO:0044464);; cellular component: cell (GO:0005623);; cellular component: organelle (GO:0043226);; biological process: response to stimulus (GO:0050896);;
gene28174	5.02333	2.35862	4.72042	LOC107404641	--	--	--	--	--	--	R	General function prediction only	PREDICTED: uncharacterized protein LOC101203426 [Cucumis sativus]	--
gene28477	17.8324	8.47078	13.1467	LOC107404981	--	--	--	K13464|9.14229e-109|pper:PRUPE_ppa009778mg|hypothetical protein; K13464 jasmonate ZIM domain-containing protein (A)	Plant hormone signal transduction (ko04075)	Protein TIFY 10A GN=T29M8.5 OS=Arabidopsis thaliana (Mouse-ear cress) PE=1 SV=1	S	Function unknown	hypothetical protein PRUPE_ppa009778mg [Prunus persica]	--
gene28483	29.913	10.2353	56.9639	LOC107404975	--	--	Molecular Function: DNA binding (GO:0003677);; Molecular Function: sequence-specific DNA binding transcription factor activity (GO:0003700);; Cellular Component: nucleus (GO:0005634);; Biological Process: regulation of transcription, DNA-templated (GO:0006355);;	--	--	Ethylene-responsive transcription factor ERF017 GN=ERF017 OS=Arabidopsis thaliana (Mouse-ear cress) PE=2 SV=1	K	Transcription	Ethylene-responsive transcription factor [Morus notabilis]	cellular component: organelle (GO:0043226);; cellular component: cell part (GO:0044464);; cellular component: cell (GO:0005623);; molecular function: binding (GO:0005488);; molecular function: nucleic acid binding transcription factor activity (GO:0001071);; biological process: biological regulation (GO:0065007);;
gene28523	5.44831	0.723867	2.27229	LOC107405035	--	--	Molecular Function: enzyme inhibitor activity (GO:0004857);; Cellular Component: cell wall (GO:0005618);; Molecular Function: pectinesterase activity (GO:0030599);; Biological Process: cell wall modification (GO:0042545);; Biological Process: negative regulation of catalytic activity (GO:0043086);; Molecular Function: aspartyl esterase activity (GO:0045330);; Biological Process: pectin catabolic …	K01051|0|pop:POPTR_0002s20370g|POPTRDRAFT_799194; hypothetical protein; K01051 pectinesterase [EC:3.1.1.11] (A)	Pentose and glucuronate interconversions (ko00040);; Starch and sucrose metabolism (ko00500)	Pectinesterase 40 (Precursor) GN=T14P8.1 OS=Arabidopsis thaliana (Mouse-ear cress) PE=2 SV=1	G	Carbohydrate transport and metabolism	PREDICTED: pectinesterase-like [Populus euphratica]	cellular component: cell (GO:0005623);; cellular component: cell part (GO:0044464);; molecular function: enzyme regulator activity (GO:0030234);; molecular function: catalytic activity (GO:0003824);; biological process: cellular component organization or biogenesis (GO:0071840);; biological process: biological regulation (GO:0065007);; biological process: cellular process (GO:0009987);; biologica…
gene28684	0.497457	0.134526	0.305803	LOC107405208	[S]	Function unknown	--	--	--	TMV resistance protein N GN=N OS=Nicotiana glutinosa (Tobacco) PE=1 SV=1	T	Signal transduction mechanisms	PREDICTED: TMV resistance protein N-like [Malus domestica]	--
gene2889	5.8274	2.3286	4.32332	LOC107406315	--	--	--	--	--	--	--	--	hypothetical protein POPTR_0001s03430g [Populus trichocarpa]	--
gene2890	5.33695	2.65937	5.05742	LOC107405906	[O]	Posttranslational modification, protein turnover, chaperones	Molecular Function: ATP binding (GO:0005524);; Biological Process: response to stress (GO:0006950);; Molecular Function: 2-alkenal reductase [NAD(P)] activity (GO:0032440);; Biological Process: oxidation-reduction process (GO:0055114);;	K03283|0|pper:PRUPE_ppa002595mg|hypothetical protein; K03283 heat shock 70kDa protein 1/8 (A)	Spliceosome (ko03040);; Protein processing in endoplasmic reticulum (ko04141);; Endocytosis (ko04144)	Heat shock cognate 70 kDa protein GN=HSP70 OS=Petunia hybrida (Petunia) PE=2 SV=1	O	Posttranslational modification, protein turnover, chaperones	hypothetical protein JCGZ_26969 [Jatropha curcas]	biological process: single-organism process (GO:0044699);; biological process: response to stimulus (GO:0050896);; biological process: metabolic process (GO:0008152);; molecular function: catalytic activity (GO:0003824);; molecular function: binding (GO:0005488);;
gene29741	0.590722	0.237346	0.427514	LOC107406341	[RTKL]	General function prediction only;; Signal transduction mechanisms;; Transcription;; Replication, recombination and repair	Biological Process: activation of MAPKK activity (GO:0000186);; Molecular Function: MAP kinase kinase kinase activity (GO:0004709);; Molecular Function: ATP binding (GO:0005524);;	--	--	Proline-rich receptor-like protein kinase PERK8 GN=PERK8 OS=Arabidopsis thaliana (Mouse-ear cress) PE=1 SV=1	T	Signal transduction mechanisms	PREDICTED: proline-rich receptor-like protein kinase PERK8 [Prunus mume]	biological process: metabolic process (GO:0008152);; biological process: signaling (GO:0023052);; biological process: response to stimulus (GO:0050896);; biological process: single-organism process (GO:0044699);; biological process: biological regulation (GO:0065007);; biological process: cellular process (GO:0009987);; molecular function: catalytic activity (GO:0003824);; molecular function: bin…
gene30139	4.62447	1.97785	3.35306	LOC107406763	--	--	--	K14546|9.62644e-45|pop:POPTR_0003s05960g|POPTRDRAFT_415284, POPTRDRAFT_854415; hypothetical protein; K14546 U3 small nucleolar RNA-associated protein 5 (A)	Ribosome biogenesis in eukaryotes (ko03008)	--	R	General function prediction only	hypothetical protein L484_001038 [Morus notabilis]	--
gene3117	56.6054	21.9724	36.3974	LOC107408468	[M]	Cell wall/membrane/envelope biogenesis	Molecular Function: monooxygenase activity (GO:0004497);; Molecular Function: iron ion binding (GO:0005506);; Biological Process: cellular amino acid metabolic process (GO:0006520);; Molecular Function: electron carrier activity (GO:0009055);; Cellular Component: chloroplast (GO:0009507);; Molecular Function: oxidoreductase activity, acting on paired donors, with incorporation or reduction of mol…	--	--	--	S	Function unknown	PREDICTED: uncharacterized protein LOC100249822 isoform X2 [Vitis vinifera]	biological process: cellular process (GO:0009987);; biological process: single-organism process (GO:0044699);; biological process: metabolic process (GO:0008152);; molecular function: catalytic activity (GO:0003824);; molecular function: binding (GO:0005488);; molecular function: electron carrier activity (GO:0009055);; cellular component: organelle (GO:0043226);; cellular component: cell part (G…
gene31539	4.55103	1.39602	7.49158	LOC107408274	[R]	General function prediction only	Molecular Function: phospholipase A2 activity (GO:0004623);; Biological Process: lipid metabolic process (GO:0006629);; Molecular Function: galactolipase activity (GO:0047714);;	--	--	Patatin-like protein 2 GN=PLP2 OS=Arabidopsis thaliana (Mouse-ear cress) PE=1 SV=1	I	Lipid transport and metabolism	Patatin group A-3 [Morus notabilis]	molecular function: catalytic activity (GO:0003824);; biological process: metabolic process (GO:0008152);; biological process: single-organism process (GO:0044699);;
gene32294	2.38407	0.523654	1.32131	LOC107409099	--	--	--	--	--	F-box protein SKIP23 GN=SKIP23 OS=Arabidopsis thaliana (Mouse-ear cress) PE=1 SV=1	R	General function prediction only	PREDICTED: F-box protein SKIP23-like [Vitis vinifera]	--
gene32506	19.6908	8.63482	27.5124	LOC107409332	[G]	Carbohydrate transport and metabolism	Cellular Component: cytosol (GO:0005829);; Biological Process: glycogen biosynthetic process (GO:0005978);; Molecular Function: glucose-1-phosphate adenylyltransferase activity (GO:0008878);; Cellular Component: chloroplast (GO:0009507);; Cellular Component: glucose-1-phosphate adenylyltransferase complex (GO:0010170);; Biological Process: starch biosynthetic process (GO:0019252);;	K00975|8.55843e-148|vvi:100253688|glucose-1-phosphate adenylyltransferase large subunit 1; K00975 glucose-1-phosphate adenylyltransferase [EC:2.7.7.27] (A)	Starch and sucrose metabolism (ko00500);; Amino sugar and nucleotide sugar metabolism (ko00520)	Glucose-1-phosphate adenylyltransferase large subunit 3, chloroplastic (Precursor) GN=APL3 OS=Arabidopsis thaliana (Mouse-ear cress) PE=2 SV=2	M	Cell wall/membrane/envelope biogenesis	Glucose-1-phosphate adenylyltransferase large subunit 3 [Morus notabilis]	biological process: cellular process (GO:0009987);; biological process: single-organism process (GO:0044699);; biological process: metabolic process (GO:0008152);; molecular function: catalytic activity (GO:0003824);; cellular component: organelle (GO:0043226);; cellular component: cell (GO:0005623);; cellular component: cell part (GO:0044464);; cellular component: macromolecular complex (GO:0032…
gene32981	12.5526	7.27873	20.6969	LOC107409847	--	--	--	--	--	Ethylene-responsive transcription factor ABR1 GN=MVP7.8 OS=Arabidopsis thaliana (Mouse-ear cress) PE=2 SV=1	K	Transcription	unnamed protein product [Vitis vinifera]	--
gene33006	6.66769	4.12683	8.92231	LOC107409876	[OC]	Posttranslational modification, protein turnover, chaperones;; Energy production and conversion	Biological Process: glycerol ether metabolic process (GO:0006662);; Molecular Function: electron carrier activity (GO:0009055);; Molecular Function: protein disulfide oxidoreductase activity (GO:0015035);; Biological Process: cell redox homeostasis (GO:0045454);;	--	--	Thioredoxin-like 1-2, chloroplastic (Precursor) GN=At5g61440 OS=Arabidopsis thaliana (Mouse-ear cress) PE=2 SV=1	O	Posttranslational modification, protein turnover, chaperones	PREDICTED: thioredoxin-like 1-2, chloroplastic [Pyrus x bretschneideri]	biological process: single-organism process (GO:0044699);; biological process: metabolic process (GO:0008152);; biological process: biological regulation (GO:0065007);; biological process: cellular process (GO:0009987);; molecular function: electron carrier activity (GO:0009055);; molecular function: catalytic activity (GO:0003824);;
gene33022	58.9564	37.6943	80.9827	LOC107409894	--	--	Biological Process: response to stress (GO:0006950);; Biological Process: response to abiotic stimulus (GO:0009628);; Biological Process: cellular process (GO:0009987);; Biological Process: response to organic substance (GO:0010033);; Biological Process: biological regulation (GO:0065007);; Biological Process: response to oxygen-containing compound (GO:1901700);;	--	--	NAC domain-containing protein 2 GN=T1N6.12 OS=Arabidopsis thaliana (Mouse-ear cress) PE=2 SV=2	K	Transcription	hypothetical protein POPTR_0007s04780g [Populus trichocarpa]	biological process: cellular process (GO:0009987);; biological process: biological regulation (GO:0065007);; biological process: response to stimulus (GO:0050896);;
gene3308	16.9221	6.59355	11.1397	LOC107410282	--	--	Cellular Component: mitochondrion (GO:0005739);;	--	--	--	S	Function unknown	Alpha-1B-glycoprotein [Gossypium arboreum]	cellular component: cell (GO:0005623);; cellular component: cell part (GO:0044464);; cellular component: organelle (GO:0043226);;
gene33148	6.46968	2.88725	4.35199	LOC107410033	--	--	Molecular Function: sequence-specific DNA binding transcription factor activity (GO:0003700);; Cellular Component: nucleus (GO:0005634);; Biological Process: regulation of transcription, DNA-templated (GO:0006355);; Biological Process: positive regulation of cell proliferation (GO:0008284);; Biological Process: response to auxin (GO:0009733);; Biological Process: procambium histogenesis (GO:00100…	K09338|1.81414e-52|mdm:103441156|homeobox-leucine zipper protein ATHB-8; K09338 homeobox-leucine zipper protein (A)	--	Homeobox-leucine zipper protein ATHB-15 OS=Arabidopsis thaliana (Mouse-ear cress) PE=1 SV=1	K	Transcription	unknown [Populus trichocarpa]	cellular component: cell part (GO:0044464);; cellular component: cell (GO:0005623);; cellular component: organelle (GO:0043226);; biological process: response to stimulus (GO:0050896);; biological process: reproductive process (GO:0022414);; biological process: single-organism process (GO:0044699);; biological process: developmental process (GO:0032502);; biological process: biological regulation…
gene3459	4.90101	1.17884	3.64328	LOC107410447	--	--	--	--	--	--	B	Chromatin structure and dynamics	hypothetical protein PRUPE_ppa008870mg [Prunus persica]	--
gene3461	1.42951	0.674087	1.23415	LOC107410449	--	--	--	--	--	--	H	Coenzyme transport and metabolism	PREDICTED: UPF0553 protein-like [Prunus mume]	--
gene3691	9.02384	3.9906	12.6112	LOC107410697	--	--	--	--	--	F-box protein At4g18380 GN=At4g18380 OS=Arabidopsis thaliana (Mouse-ear cress) PE=2 SV=1	R	General function prediction only	F-box protein [Morus notabilis]	--
gene3740	2.85981	0.251805	0.95185	LOC107410779	--	--	--	--	--	BURP domain-containing protein 3 (Precursor) OS=Oryza sativa subsp. japonica (Rice) PE=2 SV=1	R	General function prediction only	hypothetical protein PRUPE_ppa008862mg [Prunus persica]	--
gene3843	2.95898	1.29489	2.27393	LOC107410852	[M]	Cell wall/membrane/envelope biogenesis	Biological Process: sucrose metabolic process (GO:0005985);; Biological Process: biosynthetic process (GO:0009058);; Molecular Function: sucrose-phosphate synthase activity (GO:0046524);;	K00696|0|tcc:TCM_036061|Sucrose-phosphate synthase family protein isoform 1; K00696 sucrose-phosphate synthase [EC:2.4.1.14] (A)	Starch and sucrose metabolism (ko00500)	Probable sucrose-phosphate synthase 4 GN=F28M11.40 OS=Arabidopsis thaliana (Mouse-ear cress) PE=1 SV=1	M	Cell wall/membrane/envelope biogenesis	Sucrose-phosphate synthase family protein isoform 1 [Theobroma cacao]	biological process: metabolic process (GO:0008152);; biological process: single-organism process (GO:0044699);; biological process: cellular process (GO:0009987);; molecular function: catalytic activity (GO:0003824);;
gene3873	37.6171	21.7394	49.287	LOC107410918	--	--	--	--	--	--	S	Function unknown	PREDICTED: uncharacterized protein LOC103321768 isoform X1 [Prunus mume]	--
gene3904	136.088	34.1685	77.45	LOC107410922	--	--	--	--	--	--	S	Function unknown	hypothetical protein PRUPE_ppa012003mg [Prunus persica]	--
gene4071	0.683619	0.316723	0.508312	LOC107411084	--	--	--	--	--	Pentatricopeptide repeat-containing protein At4g11690 GN=At4g11690 OS=Arabidopsis thaliana (Mouse-ear cress) PE=2 SV=1	R	General function prediction only	PREDICTED: pentatricopeptide repeat-containing protein At4g11690 [Prunus mume]	--
gene4200	100.415	49.2152	91.1777	LOC107411200	--	--	--	--	--	--	S	Function unknown	hypothetical protein POPTR_0009s11140g [Populus trichocarpa]	--
gene431	10.3499	4.32179	6.70213	LOC107411182	[RTKL]	General function prediction only;; Signal transduction mechanisms;; Transcription;; Replication, recombination and repair	--	--	--	Probable LRR receptor-like serine/threonine-protein kinase At2g24230 (Precursor) GN=At2g24230 OS=Arabidopsis thaliana (Mouse-ear cress) PE=2 SV=1	T	Signal transduction mechanisms	PREDICTED: probable LRR receptor-like serine/threonine-protein kinase At2g24230 [Prunus mume]	--
gene4323	0.771242	0.353391	1.00139	LOC107411378	[RTKL]	General function prediction only;; Signal transduction mechanisms;; Transcription;; Replication, recombination and repair	Molecular Function: nucleotide binding (GO:0000166);; Molecular Function: protein kinase activity (GO:0004672);; Cellular Component: endosome (GO:0005768);; Biological Process: anatomical structure morphogenesis (GO:0009653);; Biological Process: epidermal cell differentiation (GO:0009913);; Biological Process: cellular component organization (GO:0016043);; Biological Process: phosphorylation (GO…	--	--	Receptor-like serine/threonine-protein kinase NCRK (Precursor) GN=NCRK OS=Arabidopsis thaliana (Mouse-ear cress) PE=1 SV=1	T	Signal transduction mechanisms	Receptor-like serine/threonine-protein kinase NCRK [Morus notabilis]	cellular component: cell part (GO:0044464);; cellular component: cell (GO:0005623);; cellular component: organelle (GO:0043226);; molecular function: catalytic activity (GO:0003824);; molecular function: binding (GO:0005488);; biological process: cellular process (GO:0009987);; biological process: cellular component organization or biogenesis (GO:0071840);; biological process: developmental proce…
gene4561	1.22995	0.575287	0.90898	LOC107411636	--	--	--	K10268|0|fve:101311952|F-box/LRR-repeat protein 3-like; K10268 F-box and leucine-rich repeat protein 2/20 (A)	--	F-box/LRR-repeat protein 3 GN=FBL3 OS=Arabidopsis thaliana (Mouse-ear cress) PE=2 SV=1	R	General function prediction only	hypothetical protein PRUPE_ppa002560mg [Prunus persica]	--
gene4614	2.95304	0.645302	1.82561	LOC107411670	[KAD]	Transcription;; RNA processing and modification;; Cell cycle control, cell division, chromosome partitioning	--	K09422|1.36981e-51|pper:PRUPE_ppa019718mg|hypothetical protein; K09422 myb proto-oncogene protein, plant (A)	--	Myb-related protein Hv33 GN=MYB2 OS=Hordeum vulgare (Barley) PE=2 SV=3	K	Transcription	hypothetical protein PRUPE_ppa019718mg [Prunus persica]	--
gene4838	12.9086	5.66809	12.9631	LOC107411868	--	--	Biological Process: anion transport (GO:0006820);; Cellular Component: cell part (GO:0044464);; Biological Process: intracellular transport (GO:0046907);; Biological Process: regulation of biological process (GO:0050789);; Biological Process: response to stimulus (GO:0050896);; Biological Process: organic substance transport (GO:0071702);; Biological Process: nitrogen compound transport (GO:00717…	--	--	C2 domain-containing protein At1g63220 GN=At1g63220 OS=Arabidopsis thaliana (Mouse-ear cress) PE=1 SV=1	R	General function prediction only	hypothetical protein JCGZ_23324 [Jatropha curcas]	biological process: single-organism process (GO:0044699);; biological process: response to stimulus (GO:0050896);; biological process: localization (GO:0051179);; biological process: biological regulation (GO:0065007);; cellular component: cell part (GO:0044464);;
gene5074	171.319	61.6928	105.673	LOC107412231	--	--	Molecular Function: chitin binding (GO:0008061);; Biological Process: response to virus (GO:0009615);; Biological Process: systemic acquired resistance (GO:0009627);; Biological Process: response to salt stress (GO:0009651);; Biological Process: response to ethylene (GO:0009723);; Biological Process: defense response to fungus, incompatible interaction (GO:0009817);; Biological Process: defense r…	--	--	Wound-induced protein WIN2 (Precursor) GN=WIN2 OS=Solanum tuberosum (Potato) PE=2 SV=1	R	General function prediction only	PREDICTED: pro-hevein [Glycine max]	biological process: multi-organism process (GO:0051704);; biological process: response to stimulus (GO:0050896);; biological process: immune system process (GO:0002376);; molecular function: binding (GO:0005488);;
gene5502	1.13536	0.750933	1.51832	LOC107412640	[G]	Carbohydrate transport and metabolism	Molecular Function: hydrolase activity, hydrolyzing O-glycosyl compounds (GO:0004553);; Biological Process: carbohydrate metabolic process (GO:0005975);;	K01188|0|vvi:100260409|beta-glucosidase 12-like; K01188 beta-glucosidase [EC:3.2.1.21] (A)	Cyanoamino acid metabolism (ko00460);; Starch and sucrose metabolism (ko00500);; Phenylpropanoid biosynthesis (ko00940)	Beta-glucosidase 12 (Precursor) OS=Oryza sativa subsp. japonica (Rice) PE=2 SV=2	G	Carbohydrate transport and metabolism	beta-glucosidase [Rosa hybrid cultivar]	biological process: metabolic process (GO:0008152);; molecular function: catalytic activity (GO:0003824);;
gene5543	63.1869	9.2974e-86	1.31226e-14	LOC107412698	--	--	--	--	--	Lachrymatory-factor synthase (Precursor) GN=LFS OS=Allium cepa (Onion) PE=1 SV=1	S	Function unknown	PREDICTED: lachrymatory-factor synthase-like isoform X1 [Populus euphratica]	--
gene5568	49.7508	11.0821	44.8248	LOC107412713	--	--	Cellular Component: cell wall (GO:0005618);; Biological Process: defense response (GO:0006952);; Biological Process: signal transduction (GO:0007165);; Cellular Component: plasmodesma (GO:0009506);; Cellular Component: chloroplast (GO:0009507);; Cellular Component: membrane (GO:0016020);; Cellular Component: apoplast (GO:0048046);;	--	--	DNA-damage-repair/toleration protein DRT100 (Precursor) OS=Arabidopsis thaliana (Mouse-ear cress) PE=2 SV=2	R	General function prediction only	DNA-damage-repair/toleration protein [Morus notabilis]	cellular component: cell junction (GO:0030054);; cellular component: extracellular region (GO:0005576);; cellular component: membrane (GO:0016020);; cellular component: organelle (GO:0043226);; cellular component: cell (GO:0005623);; cellular component: cell part (GO:0044464);; biological process: cellular process (GO:0009987);; biological process: biological regulation (GO:0065007);; biological …
gene5710	2.59635	0	0.958367	LOC107412871	[L]	Replication, recombination and repair	Molecular Function: ATP binding (GO:0005524);; Molecular Function: nucleoside-triphosphatase activity (GO:0017111);;	K11269|3.31065e-51|rcu:RCOM_1020420|chromosome transmission fidelity factor, putative; K11269 chromosome transmission fidelity protein 18 (A)	--	Pentatricopeptide repeat-containing protein At4g35850, mitochondrial (Precursor) GN=At4g35850 OS=Arabidopsis thaliana (Mouse-ear cress) PE=2 SV=1	O	Posttranslational modification, protein turnover, chaperones	chromosome transmission fidelity factor, putative [Ricinus communis]	molecular function: catalytic activity (GO:0003824);; molecular function: binding (GO:0005488);; biological process: metabolic process (GO:0008152);;
gene5876	1.60079	0.64285	1.17347	LOC107413054	--	--	--	--	--	Beta-D-glucosyl crocetin beta-1,6-glucosyltransferase GN=UGT94E5 OS=Gardenia jasminoides (Cape jasmine) PE=1 SV=1	CG	Energy production and conversion;; Carbohydrate transport and metabolism	hypothetical protein EUGRSUZ_J01015, partial [Eucalyptus grandis]	--
gene5889	4.93639	2.3444	4.02715	LOC107413064	[LKJ]	Replication, recombination and repair;; Transcription;; Translation, ribosomal structure and biogenesis	--	--	--	DEAD-box ATP-dependent RNA helicase 30 GN=RH30 OS=Arabidopsis thaliana (Mouse-ear cress) PE=2 SV=2	A	RNA processing and modification	PREDICTED: ATP-dependent RNA helicase DBP3 [Prunus mume]	--
gene5907	3.77116	1.51435	2.45324	LOC107413077	[I]	Lipid transport and metabolism	--	K18678|1.52862e-120|cic:CICLE_v10032240mg|hypothetical protein; K18678 phytol kinase [EC:2.7.1.182] (A)	--	Probable phytol kinase 1, chloroplastic (Precursor) OS=Glycine max (Soybean) PE=2 SV=1	S	Function unknown	hypothetical protein CICLE_v10032240mg [Citrus clementina]	--
gene5980	1.97344	0.913331	1.55234	LOC107413133	--	--	--	--	--	Basic leucine zipper 19 GN=OSJNBa0090H18.24 OS=Oryza sativa subsp. japonica (Rice) PE=2 SV=1	S	Function unknown	hypothetical protein PRUPE_ppa017576mg [Prunus persica]	--
[truncated: 1,226 more rows]
