# Supplementary figures and images for: Comparative Transcriptomic Analyses of Different Jujube Cultivars Reveal the Co-Regulation of Multiple Pathways during Fruit Cracking
Source: MDPI journal article supplement (doi:10.3390/genes13010105), 2022-01-02

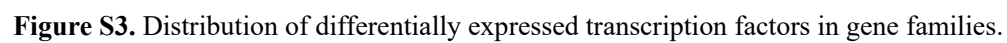

**Figure S3.** Distribution of differentially expressed transcription factors in gene families.

Supplement: s1 [file s1]

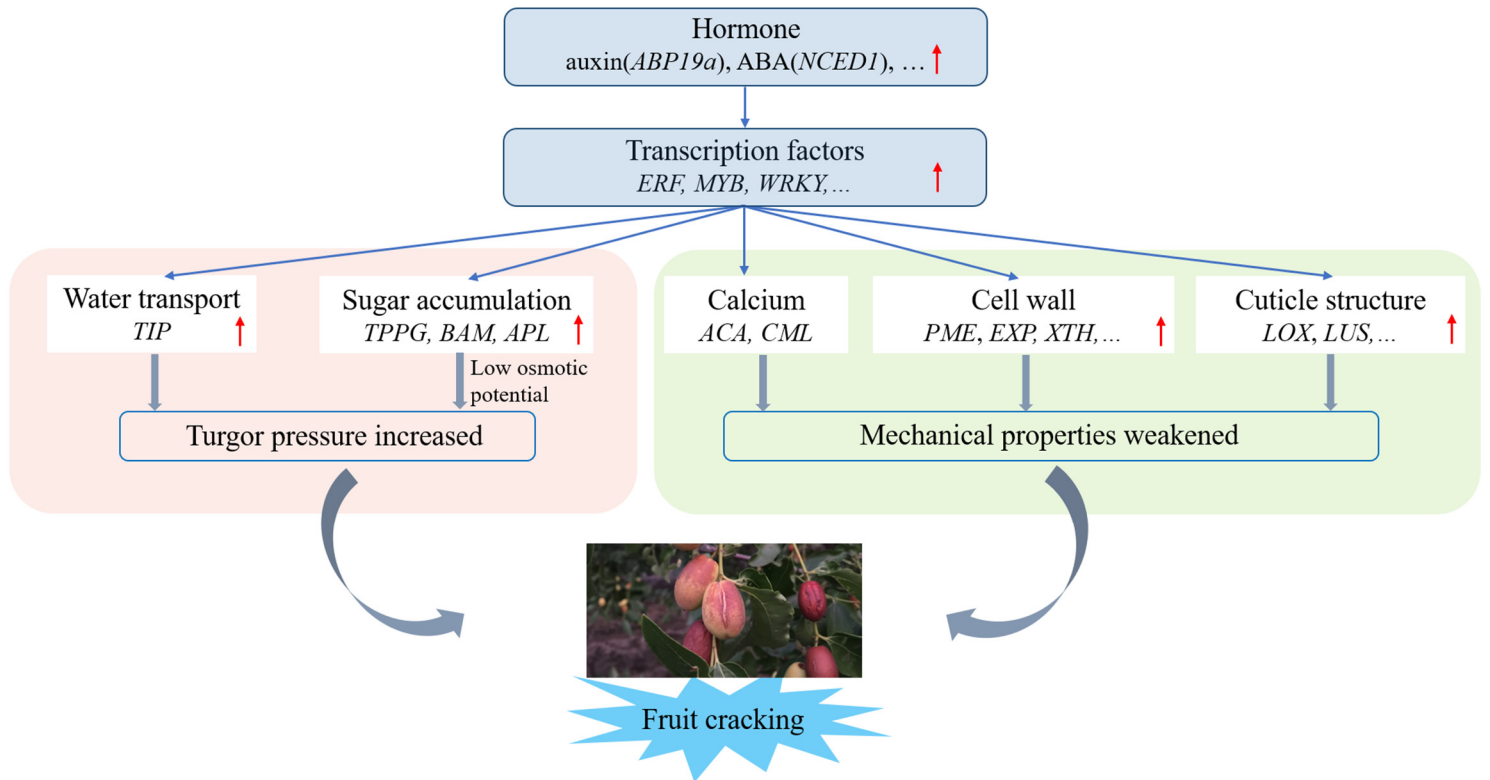

**Figure S4.** Hypothesized mechanisms of fruit cracking in jujube.

Supplement: s1 [file s1]
